# Supplementary material for: Genetically instrumented LDL‐cholesterol lowering and multiple disease outcomes: A Mendelian randomization phenome‐wide association study in the UK Biobank
Source: PubMed Central journal article supplement (PMC10952153; doi:10.1111/bcp.15793), 2023-06-06
Supplement: BCP-89-2992-s001.pdf [file BCP-89-2992-s001.pdf]

## **Online data supplement**

### **Contents (Tables):**

|                                                                                                                                                                                                                                                                                                                                                                                                                                                                                                                             |              |
|-----------------------------------------------------------------------------------------------------------------------------------------------------------------------------------------------------------------------------------------------------------------------------------------------------------------------------------------------------------------------------------------------------------------------------------------------------------------------------------------------------------------------------|--------------|
| <b>Supplementary table 1.</b> Association with LDL-cholesterol for the 21 LDL-C lowering variants (1 variant excluded from GRS) used to construct the genetic risk score in the UK Biobank and the GLGC consortium (for <i>PCSK9</i> , <i>HMGCR</i> , <i>NPC1L1</i> , and <i>LDLR</i> )                                                                                                                                                                                                                                     | <b>3</b>     |
| <b>Supplementary table 2.</b> Construction of LDL-C lowering genetic risk scores                                                                                                                                                                                                                                                                                                                                                                                                                                            | <b>4</b>     |
| <b>Supplementary table 3.</b> Disease categories and the number of cases with a phecode                                                                                                                                                                                                                                                                                                                                                                                                                                     | <b>5</b>     |
| <b>Supplementary table 4.</b> List of 1135 phecodes tested in the PheWAS analyses                                                                                                                                                                                                                                                                                                                                                                                                                                           | <b>6-13</b>  |
| <b>Supplementary table 5.</b> Power to detect associations with disease outcomes based on available numbers of cases, alpha 5%, instrument strength determined from the UK Biobank ( <i>PCSK9</i> $r^2=0.12\%$ ; <i>HMGCR</i> $r^2=0.15\%$ ; <i>NPC1L1</i> $r^2=0.026\%$ ; <i>LDLR</i> $r^2=0.64\%$ ) and four different assumed effect sizes per 1mg/dL decrease in LDL-C ( $\beta=0.2$ ; $\beta=0.5$ ; $\beta=1.0$ ; $\beta=1.5$ ). Phenotypes are listed by phecode number, as specified above in Supplementary Table 4. | <b>14-29</b> |
| <b>Supplementary table 6.</b> Associations of each genetic instrument ( <i>PCSK9</i> , <i>HMGCR</i> , <i>NPC1L1</i> , and <i>LDLR</i> ) with cardiovascular related biomarkers (from the IVWMR analyses).                                                                                                                                                                                                                                                                                                                   | <b>30</b>    |
| <b>Supplementary table 7.</b> Associations between each LDL-C lowering genetic risk score and known confounders.                                                                                                                                                                                                                                                                                                                                                                                                            | <b>31</b>    |
| <b>Supplementary table 8.</b> MR analyses using MR IVW, weighted medium, weighted mode, MR-Egger and MR-PRESSO approaches, for 13 disease outcomes identified in the PheWAS of LDL-C lowering variants under FDR corrected thresholds.                                                                                                                                                                                                                                                                                      | <b>32</b>    |
| <b>Supplementary table 9.</b> Replication of MR analyses for disease phenotypes available in the MR-Base repository.                                                                                                                                                                                                                                                                                                                                                                                                        | <b>33</b>    |
| <b>Supplementary table 10.</b> List of 52 serum, cardiac imaging, brain imaging and clinical biomarkers.                                                                                                                                                                                                                                                                                                                                                                                                                    | <b>34</b>    |
| <b>Supplementary table 11.</b> MR analyses using MR IVW, weighted medium, weighted mode, MR-Egger and MR-PRESSO approaches, for all 52 serum, urine, cardiac imaging, brain imaging and clinical biomarkers, using the <i>PCSK9</i> genetic instrument                                                                                                                                                                                                                                                                      | <b>35</b>    |
| <b>Supplementary table 12.</b> MR analyses using MR IVW, weighted medium, weighted mode, MR-Egger and MR-PRESSO approaches, for all 52 serum, urine, cardiac imaging, brain imaging and clinical biomarkers, using the <i>HMGCR</i> genetic instrument                                                                                                                                                                                                                                                                      | <b>36</b>    |
| <b>Supplementary table 13.</b> MR analyses using MR IVW, weighted medium, weighted mode, MR-Egger and MR-PRESSO approaches, for all 52 serum, urine, cardiac imaging, brain imaging and clinical biomarkers, using the <i>NPC1L1</i> genetic instrument                                                                                                                                                                                                                                                                     | <b>37</b>    |
| <b>Supplementary table 14.</b> MR analyses using MR IVW, weighted medium, weighted mode, MR-Egger and MR-PRESSO approaches, for all 52 serum, urine, cardiac imaging, brain imaging and clinical biomarkers, using the <i>LDLR</i> genetic instrument                                                                                                                                                                                                                                                                       | <b>38</b>    |

## Contents (Figures):

|                                                                                                                                                                                                                                                                                                                                                                          |              |
|--------------------------------------------------------------------------------------------------------------------------------------------------------------------------------------------------------------------------------------------------------------------------------------------------------------------------------------------------------------------------|--------------|
| <b>Supplementary figure 1.</b> Participant flowchart showing the sample restriction from the full UK Biobank cohort to the final analysis sample for the MR-PheWAS analysis.                                                                                                                                                                                             | <b>39</b>    |
| <b>Supplementary figure 2.</b> Plots for the 10 distinct LDL-C-disease associations significant under FDR correction, for the <i>PCSK9</i> genetic risk score.                                                                                                                                                                                                           | <b>40-44</b> |
| <b>Supplementary figure 3.</b> Plots for the 10 distinct LDL-C-disease associations significant under FDR correction, for the <i>HMGCR</i> genetic risk score.                                                                                                                                                                                                           | <b>45-49</b> |
| <b>Supplementary figure 4.</b> Plots for the 10 distinct LDL-C-disease associations significant under FDR correction, for the <i>NPC1L1</i> genetic risk score.                                                                                                                                                                                                          | <b>50-54</b> |
| <b>Supplementary figure 5.</b> Plots for the 10 distinct LDL-C-disease associations significant under FDR correction, for the <i>LDLR</i> genetic risk score.                                                                                                                                                                                                            | <b>55-59</b> |
| <b>Supplementary figure 6.</b> Forest plots for the mendelian randomisation analyses on 4 LDL-C lowering hormone biomarker associations, using the LDL-C lowering genetic instruments and stratified by sex. Analyses using inverse-variance weighted mendelian randomisation (IVWMR) are shown. Estimates are odds ratios (OR 95% CI) per 1mg/dL lower LDL-cholesterol. | <b>60</b>    |

**Supplementary Table 1:** Association with LDL-cholesterol for the 21 LDL-C lowering variants (1 variant excluded from GRS) used to construct the genetic risk score in the UK Biobank and the GLGC consortium.

| SNP        | Gene   | Chr | Effect allele | Other allele | Missing (UKB) | P_HWE (UKB) | Change in LDL-C per risk allele (UKB) <sup>^</sup> |              |       |         | Change in LDL-C per one risk allele (GLGC) <sup>^</sup> |              |       |         |
|------------|--------|-----|---------------|--------------|---------------|-------------|----------------------------------------------------|--------------|-------|---------|---------------------------------------------------------|--------------|-------|---------|
|            |        |     |               |              |               |             | EAF                                                | Beta (mg/dL) | SE    | P       | EAF                                                     | Beta (mg/dL) | SE    | P       |
| rs11206510 | PCSK9  | 1   | C             | T            | 0.00          | 0.05        | 0.19                                               | -1.538       | 0.108 | <1E-300 | 0.15                                                    | -2.659       | 0.005 | 2.4E-53 |
| rs2479409  | PCSK9  | 1   | A             | G            | 0.00          | 0.37        | 0.65                                               | -1.121       | 0.089 | 9.5E-37 | 0.67                                                    | -2.054       | 0.004 | 2.5E-50 |
| rs2149041  | PCSK9  | 1   | C             | G            | 0.82          | 0.30        | 0.81                                               | -1.420       | 0.109 | 7.0E-39 | 0.84                                                    | -2.035       | 0.005 | 1.4E-35 |
| rs2479394  | PCSK9  | 1   | A             | G            | 0.00          | 0.76        | 0.72                                               | -0.837       | 0.094 | 6.7E-19 | 0.72                                                    | -1.235       | 0.004 | 1.6E-19 |
| rs10888897 | PCSK9  | 1   | T             | C            | 0.00          | 0.94        | 0.39                                               | -0.983       | 0.086 | 5.7E-30 | 0.39                                                    | -1.622       | 0.004 | 8.4E-31 |
| rs7552841  | PCSK9  | 1   | C             | T            | 12.49         | 0.01        | 0.63                                               | -0.777       | 0.094 | 1.3E-16 | 0.63                                                    | -1.178       | 0.004 | 5.4E-15 |
| rs562556   | PCSK9  | 1   | G             | A            | 0.00          | 0.75        | 0.18                                               | -0.842       | 0.110 | 1.8E-14 | 0.19                                                    | -2.048       | 0.007 | 6.2E-21 |
| rs12916    | HMGCR  | 5   | T             | C            | 0.00          | 0.76        | 0.60                                               | -2.118       | 0.086 | <1E-300 | 0.57                                                    | -2.346       | 0.122 | 7.8E-78 |
| rs17238484 | HMGCR  | 5   | G             | T            | 0.04          | 0.02        | 0.78                                               | -1.761       | 0.101 | <1E-300 | 0.75                                                    | -2.006       | 0.198 | 1.4E-21 |
| rs5909     | HMGCR  | 5   | G             | A            | 0.00          | 0.59        | 0.91                                               | -1.582       | 0.145 | 1.1E-27 | 0.90                                                    | -1.974       | 0.282 | 4.9E-13 |
| rs2303152  | HMGCR  | 5   | G             | A            | 0.13          | 0.72        | 0.90                                               | -1.087       | 0.141 | 1.2E-14 | 0.88                                                    | -1.354       | 0.205 | 1.0E-09 |
| rs10066707 | HMGCR  | 5   | G             | A            | 1.68          | 0.03        | 0.63                                               | -1.379       | 0.088 | <1E-300 | 0.58                                                    | -1.590       | 0.173 | 3.0E-19 |
| rs2006760  | HMGCR  | 5   | C             | G            | 2.95          | 0.70        | 0.80                                               | -1.182       | 0.107 | 4.0E-28 | 0.81                                                    | -1.706       | 0.243 | 1.7E-13 |
| rs217386   | NPC1L1 | 7   | A             | G            | 0.00          | 0.13        | 0.42                                               | -0.794       | 0.085 | 1.4E-20 | 0.41                                                    | -1.125       | 0.118 | 1.2E-19 |
| rs2073547* | NPC1L1 | 7   | A             | G            | 0.00          | 7.48E-13    | 0.82                                               | -1.242       | 0.108 | 2.1E-30 | 0.81                                                    | -1.504       | 0.152 | 1.9E-21 |
| rs7791240  | NPC1L1 | 7   | T             | C            | 0.01          | 0.63        | 0.91                                               | -0.861       | 0.146 | 4.1E-09 | 0.91                                                    | -1.318       | 0.202 | 1.8E-10 |
| rs10234070 | NPC1L1 | 7   | C             | T            | 0.48          | 0.76        | 0.88                                               | -0.540       | 0.131 | 3.8E-05 | 0.90                                                    | -0.915       | 0.183 | 1.5E-06 |
| rs2300414  | NPC1L1 | 7   | G             | A            | 0.30          | 0.84        | 0.93                                               | -0.487       | 0.169 | 4.0E-03 | 0.93                                                    | -1.094       | 0.248 | 5.5E-06 |
| rs6511720  | LDLR   | 19  | T             | G            | 0.00          | 0.51        | 0.12                                               | -5.945       | 0.130 | <1E-300 | 0.11                                                    | -6.766       | 0.136 | <1E-300 |
| rs1122608  | LDLR   | 19  | T             | G            | 0.00          | 0.74        | 0.25                                               | -1.819       | 0.097 | <1E-300 | 0.23                                                    | -2.118       | 0.108 | 2.0E-86 |
| rs688      | LDLR   | 19  | C             | T            | 0.11          | 0.12        | 0.55                                               | -1.100       | 0.085 | 2.7E-38 | 0.56                                                    | -1.728       | 0.118 | 3.0E-48 |

UKB: UK Biobank; GLGC: Global Lipids Genetics Consortium; EAF: Effect allele frequency; and P\_HWE: P-value for Hardy-Weinberg Equilibrium test

<sup>^</sup> Estimates for the UKB were taken from models adjusted for age, sex, assessment centre, type of genotyping array, and 40 principal components; GLGC estimates were adjusted for age, sex and principal components.

\* rs2073547 excluded from the NPC1L1 genetic risk score because it deviated from the Hardy-Weinberg equilibrium (P\_HWE < 0.05).

**Supplementary Table 2:** Construction of LDL-C lowering genetic risk scores.

|                                  | No of SNPs | SNPs                                                                                     | % variation in LDL-C in UKB | Association of each GRS with LDL-C |                        |             |
|----------------------------------|------------|------------------------------------------------------------------------------------------|-----------------------------|------------------------------------|------------------------|-------------|
|                                  |            |                                                                                          |                             | Beta (95% CI)                      | P                      | F-statistic |
| <b>PCSK9 genetic risk score</b>  | 7          | rs11206510<br>rs2479409<br>rs2149041<br>rs2479394<br>rs10888897<br>rs7552841<br>rs562556 | 0.12%                       | -0.01 (-0.01, -0.01)               | $8.2 \times 10^{-89}$  | 400.03      |
| <b>HMGCR genetic risk score</b>  | 6          | rs12916<br>rs17238484<br>rs5909<br>rs2303152<br>rs10066707<br>rs2006760                  | 0.15%                       | -0.01 (-0.01, -0.01)               | $1.2 \times 10^{-105}$ | 481.80      |
| <b>NPC1L1 genetic risk score</b> | 4          | rs217386<br>rs7791240<br>rs10234070<br>rs2300414                                         | 0.026%                      | -0.01 (-0.01, -0.01)               | $1.8 \times 10^{-20}$  | 84.42       |
| <b>LDLR genetic risk score</b>   | 3          | rs6511720<br>rs1122608<br>rs688                                                          | 0.64%                       | -0.06 (-0.06, -0.06)               | $< 1 \times 10^{-300}$ | 2077.99     |

**Supplementary Table 3:** Disease categories and the number of cases with a phecode.

| Disease categories      | No of phecodes | Number of cases with phecodes * |        |      |         |
|-------------------------|----------------|---------------------------------|--------|------|---------|
|                         |                | Minimum                         | Median | Mean | Maximum |
| Circulatory system      | 116            | 209                             | 1509   | 5075 | 75408   |
| Congenital anomalies    | 26             | 204                             | 428    | 836  | 3002    |
| Dermatologic            | 58             | 205                             | 1192   | 2075 | 7950    |
| Digestive               | 132            | 208                             | 1826   | 4980 | 45454   |
| Endocrine/metabolic     | 77             | 200                             | 631    | 3436 | 35143   |
| Genitourinary           | 123            | 200                             | 1393   | 2913 | 17536   |
| Hematopoietic           | 28             | 200                             | 716    | 1888 | 12234   |
| Infectious diseases     | 28             | 207                             | 1069   | 2157 | 11864   |
| Injuries & poisonings   | 70             | 211                             | 1403   | 2832 | 18479   |
| Mental disorders        | 41             | 248                             | 837    | 4115 | 39468   |
| Musculoskeletal         | 87             | 204                             | 1419   | 4806 | 50335   |
| Neoplasms               | 100            | 201                             | 1404   | 3344 | 30162   |
| Neurological            | 50             | 210                             | 514    | 1352 | 11404   |
| Pregnancy complications | 28             | 217                             | 1036   | 1317 | 4525    |
| Respiratory             | 59             | 203                             | 1762   | 2945 | 24896   |
| Sense organs            | 74             | 209                             | 760    | 1694 | 22347   |
| Symptoms                | 22             | 212                             | 2140   | 5270 | 37426   |
| Miscellaneous           | 16             | 200                             | 1293   | 4502 | 16572   |
| <b>Total phecodes</b>   | <b>1135</b>    |                                 |        |      |         |

\* Number of phecode cases was the same across all genetic risk scores.

**Supplementary Table 4:** List of 1135 phecodes tested in the PheWAS analyses.

| Phecode | Description                                                                              | Group               | Cases | Controls | Phecode | Description                                                                        | Group       | Cases | Controls |
|---------|------------------------------------------------------------------------------------------|---------------------|-------|----------|---------|------------------------------------------------------------------------------------|-------------|-------|----------|
| 008     | Intestinal infection                                                                     | infectious diseases | 10361 | 304892   | 507     | Pleurisy; pleural effusion                                                         | respiratory | 6979  | 269389   |
| 008.5   | Bacterial enteritis                                                                      | infectious diseases | 2546  | 304892   | 508     | Pulmonary collapse; interstitial & compensatory emphysema                          | respiratory | 2447  | 269389   |
| 008.52  | Intestinal infection due to C. difficile                                                 | infectious diseases | 673   | 304892   | 509     | Respiratory failure, insufficiency, arrest                                         | respiratory | 3054  | 269389   |
| 008.6   | Viral Enteritis                                                                          | infectious diseases | 903   | 304892   | 509.1   | Respiratory failure                                                                | respiratory | 2479  | 269389   |
| 038     | Septicemia                                                                               | infectious diseases | 4885  | 304892   | 509.2   | Respiratory insufficiency                                                          | respiratory | 2205  | 269389   |
| 038.1   | Gram negative septicemia                                                                 | infectious diseases | 962   | 304892   | 509.8   | Dependence on respirator [Ventilator] or supplemental oxygen                       | respiratory | 444   | 269389   |
| 038.2   | Gram positive septicemia                                                                 | infectious diseases | 506   | 304892   | 510     | Other diseases of lung                                                             | respiratory | 1171  | 269389   |
| 041     | Bacterial infection NOS                                                                  | infectious diseases | 11864 | 304892   | 512     | Other symptoms of respiratory system                                               | respiratory | 9349  | 269389   |
| 041.1   | Staphylococcus infections                                                                | infectious diseases | 3057  | 304892   | 512.1   | Wheezing                                                                           | respiratory | 268   | 269389   |
| 041.11  | Methicillin sensitive Staphylococcus aureus                                              | infectious diseases | 2191  | 304892   | 512.2   | Painful respiration                                                                | respiratory | 203   | 269389   |
| 041.2   | Streptococcus infection                                                                  | infectious diseases | 1659  | 304892   | 512.7   | Shortness of breath                                                                | respiratory | 6109  | 269389   |
| 041.4   | E. coli                                                                                  | infectious diseases | 2977  | 304892   | 512.8   | Cough                                                                              | respiratory | 2986  | 269389   |
| 053     | Herpes zoster                                                                            | infectious diseases | 426   | 304892   | 512.9   | Other dyspnea                                                                      | respiratory | 884   | 269389   |
| 054     | Herpes simplex                                                                           | infectious diseases | 207   | 304892   | 513     | Respiratory abnormalities                                                          | respiratory | 603   | 269389   |
| 070     | Viral hepatitis                                                                          | infectious diseases | 580   | 304892   | 513.4   | Hyperventilation                                                                   | respiratory | 251   | 269389   |
| 070.3   | Viral hepatitis C                                                                        | infectious diseases | 237   | 304892   | 514     | Abnormal findings examination of lungs                                             | respiratory | 2607  | 269389   |
| 070.4   | Chronic hepatitis                                                                        | infectious diseases | 261   | 304892   | 516     | Abnormal sputum                                                                    | respiratory | 2036  | 269389   |
| 070.9   | Hepatitis NOS                                                                            | infectious diseases | 476   | 304892   | 516.1   | Hemoptysis                                                                         | respiratory | 1948  | 269389   |
| 078     | Viral warts & HPV                                                                        | infectious diseases | 1176  | 304892   | 519     | Other diseases of respiratory system, not elsewhere classified                     | respiratory | 9890  | 269389   |
| 079     | Viral infection                                                                          | infectious diseases | 2704  | 304892   | 519.2   | Respiratory complications                                                          | respiratory | 323   | 269389   |
| 079.9   | Viremia, NOS                                                                             | infectious diseases | 1577  | 304892   | 519.8   | Other diseases of respiratory system, NEC                                          | respiratory | 9307  | 269389   |
| 080     | Postoperative infection                                                                  | infectious diseases | 4201  | 304892   | 519.9   | Symptoms involving respiratory system & other chest symptoms                       | respiratory | 272   | 269389   |
| 081     | Infection/inflammation of internal prosthetic device; implant; & graft                   | infectious diseases | 2438  | 304892   | 520     | Disorders of tooth development                                                     | digestive   | 2122  | 191014   |
| 1000    | Burns                                                                                    | miscellaneous       | 511   | 336964   | 520.2   | Disturbances in tooth eruption                                                     | digestive   | 2041  | 191014   |
| 1001    | Foreign body injury                                                                      | miscellaneous       | 1110  | 336365   | 521     | Diseases of hard tissues of teeth                                                  | digestive   | 3012  | 191014   |
| 1002    | Symptoms concerning nutrition, metabolism, & development                                 | miscellaneous       | 5846  | 331629   | 521.1   | Dental caries                                                                      | digestive   | 2952  | 191014   |
| 1004    | Other signs & symptoms involving emotional state                                         | miscellaneous       | 444   | 337031   | 522     | Diseases of pulp & periapical tissues                                              | digestive   | 1661  | 191014   |
| 1005    | Other symptoms                                                                           | miscellaneous       | 1476  | 335999   | 522.5   | Periapical abscess                                                                 | digestive   | 1117  | 191014   |
| 1006    | Crushing injury                                                                          | miscellaneous       | 200   | 337275   | 523     | Gingival & periodontal diseases                                                    | digestive   | 1638  | 191014   |
| 1007    | Injury to blood vessels                                                                  | miscellaneous       | 281   | 337194   | 523.3   | Periodontitis (acute or chronic)                                                   | digestive   | 1133  | 191014   |
| 1008    | Crushing or internal injury to organs                                                    | miscellaneous       | 1051  | 336424   | 523.32  | Chronic periodontitis                                                              | digestive   | 1000  | 191014   |
| 1009    | Injury, NOS                                                                              | miscellaneous       | 7326  | 330149   | 524     | Dentofacial anomalies, including malocclusion                                      | digestive   | 309   | 191014   |
| 1010    | Other tests                                                                              | miscellaneous       | 16572 | 320903   | 524.3   | Anomalies of tooth position/malocclusion                                           | digestive   | 276   | 191014   |
| 1011    | Complications of surgical & medical procedures                                           | miscellaneous       | 10083 | 327392   | 525     | Other diseases of the teeth & supporting structures                                | digestive   | 2546  | 191014   |
| 1013    | Asphyxia & hypoxemia                                                                     | miscellaneous       | 349   | 337126   | 526     | Diseases of the jaws                                                               | digestive   | 909   | 191014   |
| 1014    | Effects of heat, cold & air pressure                                                     | miscellaneous       | 254   | 337221   | 526.1   | Cysts of the jaws                                                                  | digestive   | 312   | 191014   |
| 1015    | Effects of other external causes                                                         | miscellaneous       | 10460 | 327015   | 526.4   | Temporomandibular joint disorders                                                  | digestive   | 229   | 191014   |
| 1019    | Other ill-defined & unknown causes of morbidity & mortality                              | miscellaneous       | 13786 | 323689   | 526.41  | Temporomandibular joint disorder, unspecified                                      | digestive   | 222   | 191014   |
| 110     | Dermatophytosis / Dermatomycosis                                                         | infectious diseases | 294   | 304892   | 526.9   | Jaw disease NOS                                                                    | digestive   | 220   | 191014   |
| 110.1   | Dermatophytosis                                                                          | infectious diseases | 288   | 304892   | 527     | Diseases of the salivary glands                                                    | digestive   | 663   | 191014   |
| 1100    | Family history of colonic polyps                                                         | miscellaneous       | 2277  | 335198   | 527.2   | Sialoadenitis                                                                      | digestive   | 340   | 191014   |
| 112     | Candidiasis                                                                              | infectious diseases | 2400  | 304892   | 528     | Diseases of the oral soft tissues, excluding lesions specific for gingiva & tongue | digestive   | 3788  | 191014   |
| 117     | Mycoses                                                                                  | infectious diseases | 307   | 304892   | 528.1   | Stomatitis & mucositis                                                             | digestive   | 475   | 191014   |
| 136     | Other infectious & parasitic diseases                                                    | infectious diseases | 237   | 304892   | 528.11  | Stomatitis & mucositis (ulcerative)                                                | digestive   | 406   | 191014   |
| 145     | Cancer of mouth                                                                          | neoplasms           | 627   | 234242   | 528.5   | Diseases of lips                                                                   | digestive   | 644   | 191014   |
| 145.2   | Cancer of tongue                                                                         | neoplasms           | 303   | 234242   | 528.6   | Leukoplakia of oral mucosa                                                         | digestive   | 298   | 191014   |
| 149     | Cancer of larynx, pharynx, nasal cavities                                                | neoplasms           | 630   | 234242   | 528.7   | Sialolithiasis                                                                     | digestive   | 289   | 191014   |
| 149.1   | Cancer of oropharynx                                                                     | neoplasms           | 257   | 234242   | 529     | Diseases & other conditions of the tongue                                          | digestive   | 1210  | 191014   |
| 149.4   | Cancer of larynx                                                                         | neoplasms           | 252   | 234242   | 529.1   | Glossitis                                                                          | digestive   | 290   | 191014   |
| 150     | Cancer of esophagus                                                                      | neoplasms           | 817   | 234242   | 530     | Diseases of esophagus                                                              | digestive   | 34889 | 191014   |
| 151     | Cancer of stomach                                                                        | neoplasms           | 603   | 234242   | 530.1   | Esophagitis, GERD, & related diseases                                              | digestive   | 32569 | 191014   |
| 153     | Colorectal cancer                                                                        | neoplasms           | 4541  | 234242   | 530.11  | GERD                                                                               | digestive   | 15750 | 191014   |
| 153.2   | Colon cancer                                                                             | neoplasms           | 3053  | 234242   | 530.12  | Ulcer of esophagus                                                                 | digestive   | 4731  | 191014   |
| 153.3   | Malignant neoplasm of rectum, rectosigmoid junction, & anus                              | neoplasms           | 2169  | 234242   | 530.13  | Barrett's esophagus                                                                | digestive   | 3105  | 191014   |
| 155     | Cancer of liver & intrahepatic bile duct                                                 | neoplasms           | 449   | 234242   | 530.14  | Reflux esophagitis                                                                 | digestive   | 10069 | 191014   |
| 157     | Pancreatic cancer                                                                        | neoplasms           | 756   | 234242   | 530.2   | Esophageal bleeding (varices/hemorrhage)                                           | digestive   | 1770  | 191014   |
| 158     | Neoplasm of unspecified nature of digestive system                                       | neoplasms           | 1091  | 234242   | 530.3   | Stricture & stenosis of esophagus                                                  | digestive   | 1940  | 191014   |
| 159     | Malignant neoplasm of other & ill-defined sites within the digestive organs & peritoneum | neoplasms           | 5580  | 234242   | 530.5   | Disorders of esophageal motility                                                   | digestive   | 637   | 191014   |
| 159.2   | Malignant neoplasm of small intestine, including duodenum                                | neoplasms           | 204   | 234242   | 530.7   | Gastroesophageal laceration-hemorrhage syndrome                                    | digestive   | 303   | 191014   |
| 159.3   | Malignant neoplasm of gallbladder & extrahepatic bile ducts                              | neoplasms           | 233   | 234242   | 530.9   | Heartburn                                                                          | digestive   | 2010  | 191014   |
| 159.4   | Malignant neoplasm of retroperitoneum & peritoneum                                       | neoplasms           | 205   | 234242   | 531     | Peptic ulcer (excl. esophageal)                                                    | digestive   | 7143  | 191014   |
| 165     | Cancer within the respiratory system                                                     | neoplasms           | 3012  | 234242   | 531.1   | Hemorrhage from gastrointestinal ulcer                                             | digestive   | 638   | 191014   |
| 165.1   | Cancer of bronchus; lung                                                                 | neoplasms           | 2617  | 234242   | 531.2   | Gastric ulcer                                                                      | digestive   | 4026  | 191014   |
| 170     | Cancer of bone & connective tissue                                                       | neoplasms           | 443   | 234242   | 531.3   | Duodenal ulcer                                                                     | digestive   | 2794  | 191014   |
| 170.2   | Cancer of connective tissue                                                              | neoplasms           | 320   | 234242   | 531.4   | Peptic ulcer, site unspecified                                                     | digestive   | 404   | 191014   |
| 172     | Skin cancer                                                                              | neoplasms           | 14207 | 234242   | 532     | Dysphagia                                                                          | digestive   | 6669  | 191014   |
| 172.1   | Melanomas of skin, dx or hx                                                              | neoplasms           | 2739  | 234242   | 535     | Gastritis & duodenitis                                                             | digestive   | 28094 | 191014   |
| 172.11  | Melanomas of skin                                                                        | neoplasms           | 2739  | 234242   | 535.1   | Acute gastritis                                                                    | digestive   | 1145  | 191014   |
| 172.2   | Other non-epithelial cancer of skin                                                      | neoplasms           | 11594 | 234242   | 535.2   | Atrophic gastritis                                                                 | digestive   | 372   | 191014   |
| 172.3   | Carcinoma in situ of skin                                                                | neoplasms           | 741   | 234242   | 535.6   | Duodenitis                                                                         | digestive   | 7254  | 191014   |
| 174     | Breast cancer                                                                            | neoplasms           | 12023 | 232710   | 535.8   | Other specified gastritis                                                          | digestive   | 8264  | 191014   |
| 174.1   | Breast cancer [female]                                                                   | neoplasms           | 11848 | 120733   | 536     | Disorders of function of stomach                                                   | digestive   | 11052 | 191014   |
| 174.11  | Malignant neoplasm of female breast                                                      | neoplasms           | 11108 | 120733   | 536.8   | Dyspepsia & other specified disorders of function of stomach                       | digestive   | 11046 | 191014   |
| 175     | Acquired absence of breast                                                               | neoplasms           | 3261  | 120184   | 537     | Other disorders of stomach & duodenum                                              | digestive   | 3459  | 191014   |
| 180     | Cervical cancer & dysplasia                                                              | neoplasms           | 3299  | 122212   | 540     | Appendiceal conditions                                                             | digestive   | 3462  | 191014   |

| Phocode | Description                                                        | Group               | Cases | Controls | Phocode | Description                                                                        | Group     | Cases | Controls |
|---------|--------------------------------------------------------------------|---------------------|-------|----------|---------|------------------------------------------------------------------------------------|-----------|-------|----------|
| 180.1   | Cervical cancer                                                    | neoplasms           | 1622  | 122212   | 540.1   | Appendicitis                                                                       | digestive | 3299  | 191014   |
| 180.3   | Cervical intraepithelial neoplasia [CIN] [Cervical dysplasia]      | neoplasms           | 1757  | 122212   | 540.11  | Acute appendicitis                                                                 | digestive | 2801  | 191014   |
| 182     | Malignant neoplasm of uterus                                       | neoplasms           | 1240  | 122251   | 550     | Abdominal hernia                                                                   | digestive | 45454 | 191014   |
| 184     | Cancer of other female genital organs                              | neoplasms           | 2388  | 122251   | 550.1   | Inguinal hernia                                                                    | digestive | 15079 | 191014   |
| 184.1   | Malignant neoplasm of ovary & other uterine adnexa                 | neoplasms           | 2091  | 122251   | 550.2   | Diaphragmatic hernia                                                               | digestive | 26753 | 191014   |
| 184.11  | Malignant neoplasm of ovary                                        | neoplasms           | 2072  | 122251   | 550.3   | Femoral hernia                                                                     | digestive | 634   | 191014   |
| 184.2   | Cancer of other female genital organs (excluding uterus & ovary)   | neoplasms           | 281   | 122251   | 550.4   | Umbilical hernia                                                                   | digestive | 3634  | 191014   |
| 185     | Cancer of prostate                                                 | neoplasms           | 7072  | 105218   | 550.5   | Ventral hernia                                                                     | digestive | 3384  | 191014   |
| 187     | Cancer of other male genital organs                                | neoplasms           | 3330  | 111991   | 550.6   | Incisional hernia                                                                  | digestive | 246   | 191014   |
| 187.1   | Malignant neoplasm of unspecified male genital organ               | neoplasms           | 3085  | 111991   | 555     | Inflammatory bowel disease & other gastroenteritis & colitis                       | digestive | 4149  | 191014   |
| 187.2   | Malignant neoplasm of testis                                       | neoplasms           | 3194  | 111991   | 555.1   | Regional enteritis                                                                 | digestive | 1621  | 191014   |
| 189     | Cancer of urinary organs (incl. kidney & bladder)                  | neoplasms           | 4104  | 234242   | 555.2   | Ulcerative colitis                                                                 | digestive | 2920  | 191014   |
| 189.1   | Cancer of kidney & renal pelvis                                    | neoplasms           | 1098  | 234242   | 555.21  | Ulcerative colitis (chronic)                                                       | digestive | 541   | 191014   |
| 189.11  | Malignant neoplasm of kidney, except pelvis                        | neoplasms           | 1055  | 234242   | 556     | Ulceration of the lower GI tract                                                   | digestive | 1084  | 191014   |
| 189.2   | Cancer of bladder                                                  | neoplasms           | 2339  | 234242   | 556.1   | Ulceration of intestine                                                            | digestive | 711   | 191014   |
| 189.21  | Malignant neoplasm of bladder                                      | neoplasms           | 2083  | 234242   | 557     | Intestinal malabsorption (non-celiac)                                              | digestive | 287   | 191014   |
| 191     | Malignant & unknown neoplasms of brain & nervous system            | neoplasms           | 702   | 234242   | 557.1   | Celiac disease                                                                     | digestive | 1764  | 191014   |
| 191.1   | Cancer of brain & nervous system                                   | neoplasms           | 579   | 234242   | 558     | Noninfectious gastroenteritis                                                      | digestive | 13696 | 191014   |
| 191.11  | Cancer of brain                                                    | neoplasms           | 539   | 234242   | 559     | Ileostomy status                                                                   | digestive | 1579  | 191014   |
| 193     | Thyroid cancer                                                     | neoplasms           | 345   | 234242   | 560     | Intestinal obstruction without mention of hernia                                   | digestive | 4175  | 191014   |
| 195     | Cancer, suspected or other                                         | neoplasms           | 17637 | 234242   | 560.1   | Paralytic ileus                                                                    | digestive | 602   | 191014   |
| 195.1   | Malignant neoplasm, other                                          | neoplasms           | 16966 | 234242   | 560.2   | Impaction of intestine                                                             | digestive | 282   | 191014   |
| 196     | Radiotherapy                                                       | neoplasms           | 12225 | 234242   | 560.3   | Peritoneal or intestinal adhesions                                                 | digestive | 874   | 191014   |
| 197     | Chemotherapy                                                       | neoplasms           | 30162 | 234242   | 560.4   | Other intestinal obstruction                                                       | digestive | 3467  | 191014   |
| 198     | Secondary malignant neoplasm                                       | neoplasms           | 10103 | 234242   | 561     | Symptoms involving digestive system                                                | digestive | 16127 | 191014   |
| 198.1   | Secondary malignancy of lymph nodes                                | neoplasms           | 5504  | 234242   | 561.1   | Diarrhea                                                                           | digestive | 536   | 191014   |
| 198.2   | Secondary malignancy of respiratory organs                         | neoplasms           | 2544  | 234242   | 561.2   | Flatulence                                                                         | digestive | 1767  | 191014   |
| 198.3   | Secondary malignant neoplasm of digestive systems                  | neoplasms           | 1757  | 234242   | 562     | Diverticulosis & diverticulitis                                                    | digestive | 28363 | 191014   |
| 198.4   | Secondary malignant neoplasm of liver                              | neoplasms           | 2970  | 234242   | 562.1   | Diverticulosis                                                                     | digestive | 28326 | 191014   |
| 198.5   | Secondary malignancy of brain/spine                                | neoplasms           | 927   | 234242   | 563     |                                                                                    | digestive | 10878 | 191014   |
| 198.6   | Secondary malignancy of bone                                       | neoplasms           | 2454  | 234242   | 564     | Functional digestive disorders                                                     | digestive | 22341 | 191014   |
| 198.7   | Secondary malignant neoplasm of skin                               | neoplasms           | 201   | 234242   | 564.1   | Irritable Bowel Syndrome                                                           | digestive | 5580  | 191014   |
| 199     | Neoplasm of uncertain behavior                                     | neoplasms           | 1504  | 234242   | 564.8   |                                                                                    | digestive | 1743  | 191014   |
| 200     | Myeloproliferative disease                                         | neoplasms           | 1054  | 234242   | 564.9   | Personal history of diseases of digestive system                                   | digestive | 15641 | 191014   |
| 200.1   | Polycythemia vera                                                  | neoplasms           | 408   | 232957   | 565     | Anal & rectal conditions                                                           | digestive | 14352 | 191014   |
| 201     | Hodgkin's disease                                                  | neoplasms           | 252   | 234242   | 565.1   | Anal & rectal polyp                                                                | digestive | 7409  | 191014   |
| 202     | Cancer of other lymphoid, histiocytic tissue                       | neoplasms           | 2358  | 234242   | 567     | Peritonitis & retroperitoneal infections                                           | digestive | 949   | 191014   |
| 202.2   | Non-Hodgkins lymphoma                                              | neoplasms           | 1853  | 234242   | 568     | Other disorders of peritoneum                                                      | digestive | 3567  | 191014   |
| 202.21  | Nodular lymphoma                                                   | neoplasms           | 358   | 234242   | 568.1   | Peritoneal adhesions (postoperative) (postinfection)                               | digestive | 3346  | 191014   |
| 202.24  | Large cell lymphoma                                                | neoplasms           | 623   | 234242   | 569     | Other disorders of intestine                                                       | digestive | 4313  | 191014   |
| 204     | Leukemia                                                           | neoplasms           | 1774  | 234242   | 569.1   | Toxic gastroenteritis & colitis                                                    | digestive | 208   | 191014   |
| 204.1   | Lymphoid leukemia                                                  | neoplasms           | 612   | 234242   | 569.2   | Gastrointestinal complications                                                     | digestive | 515   | 191014   |
| 204.12  | Lymphoid leukemia, chronic                                         | neoplasms           | 540   | 234242   | 571     | Chronic liver disease & cirrhosis                                                  | digestive | 4206  | 191014   |
| 204.2   | Myeloid leukemia                                                   | neoplasms           | 507   | 234242   | 571.5   | Other chronic nonalcoholic liver disease                                           | digestive | 3329  | 191014   |
| 204.21  | Myeloid leukemia, acute                                            | neoplasms           | 353   | 234242   | 571.51  | Cirrhosis of liver without mention of alcohol                                      | digestive | 749   | 191014   |
| 204.4   | Multiple myeloma                                                   | neoplasms           | 593   | 234242   | 571.6   | Primary biliary cirrhosis                                                          | digestive | 258   | 191014   |
| 208     | Benign neoplasm of colon                                           | neoplasms           | 20688 | 234242   | 571.8   | Liver abscess & sequelae of chronic liver disease                                  | digestive | 1140  | 191014   |
| 210     | Benign neoplasm of lip, oral cavity, & pharynx                     | neoplasms           | 911   | 234242   | 571.81  | Portal hypertension                                                                | digestive | 589   | 191014   |
| 211     | Benign neoplasm of other parts of digestive system                 | neoplasms           | 5805  | 234242   | 572     | Ascites (nonmalignant)                                                             | digestive | 1656  | 191014   |
| 212     | Benign neoplasm of respiratory & intrathoracic organs              | neoplasms           | 341   | 234242   | 573     | Other disorders of liver                                                           | digestive | 1712  | 191014   |
| 213     | Benign neoplasm of bone & articular cartilage                      | neoplasms           | 284   | 234242   | 573.3   | Hepatomegaly                                                                       | digestive | 295   | 191014   |
| 214     | Lipoma                                                             | neoplasms           | 5942  | 234242   | 573.5   | Jaundice (not of newborn)                                                          | digestive | 914   | 191014   |
| 214.1   | Lipoma of skin & subcutaneous tissue                               | neoplasms           | 4303  | 234242   | 573.7   | Abnormal results of function study of liver                                        | digestive | 3714  | 191014   |
| 215     | Other benign neoplasm of connective & other soft tissue            | neoplasms           | 1015  | 234242   | 573.9   | Abnormal serum enzyme levels                                                       | digestive | 214   | 191014   |
| 216     | Benign neoplasm of skin                                            | neoplasms           | 8174  | 234242   | 574     | Cholelithiasis & cholecystitis                                                     | digestive | 15179 | 191014   |
| 217     | Vascular hamartomas & non-neoplastic nevi                          | neoplasms           | 592   | 234242   | 574.1   | Cholelithiasis                                                                     | digestive | 12924 | 191014   |
| 217.1   | Nevus, non-neoplastic                                              | neoplasms           | 548   | 234242   | 574.11  | Cholelithiasis with acute cholecystitis                                            | digestive | 1537  | 191014   |
| 218     | Benign neoplasm of uterus                                          | neoplasms           | 9233  | 122251   | 574.12  | Cholelithiasis with other cholecystitis                                            | digestive | 5200  | 191014   |
| 218.1   | Uterine leiomyoma                                                  | neoplasms           | 9007  | 122251   | 574.2   | Calculus of bile duct                                                              | digestive | 2550  | 191014   |
| 218.2   | Other benign neoplasm of uterus                                    | neoplasms           | 304   | 122251   | 574.3   | Cholecystitis without cholelithiasis                                               | digestive | 2574  | 191014   |
| 220     | Benign neoplasm of ovary                                           | neoplasms           | 1320  | 122251   | 575     | Other biliary tract disease                                                        | digestive | 3989  | 191014   |
| 225     | Benign neoplasm of brain & other parts of nervous system           | neoplasms           | 818   | 234242   | 575.1   | Cholangitis                                                                        | digestive | 599   | 191014   |
| 225.1   | Benign neoplasm of brain, cranial nerves, meninges                 | neoplasms           | 764   | 234242   | 575.2   | Obstruction of bile duct                                                           | digestive | 850   | 191014   |
| 226     | Benign neoplasm of thyroid glands                                  | neoplasms           | 260   | 234242   | 575.6   | Cholesterosis of gallbladder                                                       | digestive | 437   | 191014   |
| 227     | Benign neoplasm of other endocrine glands & related structures     | neoplasms           | 895   | 234242   | 575.7   | Other disorders of gallbladder                                                     | digestive | 1372  | 191014   |
| 227.2   | Benign neoplasm of parathyroid gland                               | neoplasms           | 377   | 234242   | 575.8   | Other disorders of biliary tract                                                   | digestive | 1096  | 191014   |
| 227.3   | Benign neoplasm of pituitary gland & craniopharyngeal duct (pouch) | neoplasms           | 319   | 234242   | 575.9   | Nonspecific abnormal findings on radiological & other examination of biliary tract | digestive | 360   | 191014   |
| 228     | Hemangioma & lymphangioma, any site                                | neoplasms           | 1487  | 234242   | 577     | Diseases of pancreas                                                               | digestive | 2747  | 191014   |
| 229     | Benign neoplasm of unspecified sites                               | neoplasms           | 2113  | 234242   | 577.1   | Acute pancreatitis                                                                 | digestive | 1925  | 191014   |
| 240     | Simple & unspecified goiter                                        | endocrine/metabolic | 542   | 261466   | 577.2   | Chronic pancreatitis                                                               | digestive | 473   | 191014   |
| 241     | Nontoxic nodular goiter                                            | endocrine/metabolic | 1539  | 261466   | 577.3   | Cyst & pseudocyst of pancreas                                                      | digestive | 388   | 191014   |
| 241.1   | Nontoxic uninodular goiter                                         | endocrine/metabolic | 478   | 261466   | 578     | Gastrointestinal hemorrhage                                                        | digestive | 19880 | 191014   |
| 241.2   | Nontoxic multinodular goiter                                       | endocrine/metabolic | 631   | 261466   | 578.1   | Hematemesis                                                                        | digestive | 1882  | 191014   |
| 242     | Thyrotoxicosis with or without goiter                              | endocrine/metabolic | 1795  | 261466   | 578.2   | Blood in stool                                                                     | digestive | 2514  | 191014   |
| 242.1   | Graves' disease                                                    | endocrine/metabolic | 439   | 261466   | 578.8   | Hemorrhage of rectum & anus                                                        | digestive | 11473 | 191014   |
| 242.3   | Exophthalmos                                                       | endocrine/metabolic | 210   | 261466   | 578.9   | Hemorrhage of gastrointestinal tract                                               | digestive | 6068  | 191014   |

| Phocode | Description                                                   | Group               | Cases | Controls | Phocode | Description                                                   | Group         | Cases | Controls |
|---------|---------------------------------------------------------------|---------------------|-------|----------|---------|---------------------------------------------------------------|---------------|-------|----------|
| 244     | Hypothyroidism                                                | endocrine/metabolic | 14603 | 261466   | 579     | Other symptoms involving abdomen & pelvis                     | digestive     | 1543  | 191014   |
| 244.1   | Secondary hypothyroidism                                      | endocrine/metabolic | 1144  | 261466   | 579.2   | Splenomegaly                                                  | digestive     | 447   | 191014   |
| 244.4   | Hypothyroidism NOS                                            | endocrine/metabolic | 13923 | 261466   | 579.8   | Nonspecific abnormal findings in stool contents               | digestive     | 1887  | 191014   |
| 245     | Thyroiditis                                                   | endocrine/metabolic | 282   | 261466   | 580     | Nephritis; nephrosis; renal sclerosis                         | genitourinary | 1984  | 234338   |
| 245.2   | Chronic thyroiditis                                           | endocrine/metabolic | 215   | 261466   | 580.1   | Glomerulonephritis                                            | genitourinary | 906   | 234338   |
| 245.21  | Chronic lymphocytic thyroiditis                               | endocrine/metabolic | 202   | 261466   | 580.14  | Chronic glomerulonephritis, NOS                               | genitourinary | 723   | 234338   |
| 246     | Other disorders of thyroid                                    | endocrine/metabolic | 386   | 261466   | 580.2   | Nephrotic syndrome without mention of glomerulonephritis      | genitourinary | 1042  | 234338   |
| 250     | Diabetes mellitus                                             | endocrine/metabolic | 19441 | 261466   | 580.3   | Nephritis & nephropathy without mention of glomerulonephritis | genitourinary | 301   | 234338   |
| 250.1   | Type 1 diabetes                                               | endocrine/metabolic | 2582  | 261466   | 580.32  | Nephritis & nephropathy with pathological lesion              | genitourinary | 286   | 234338   |
| 250.11  | Type 1 diabetes with ketoacidosis                             | endocrine/metabolic | 212   | 261466   | 585     | Renal failure                                                 | genitourinary | 10995 | 234338   |
| 250.13  | Type 1 diabetes with ophthalmic manifestations                | endocrine/metabolic | 451   | 261466   | 585.1   | Acute renal failure                                           | genitourinary | 6203  | 234338   |
| 250.2   | Type 2 diabetes                                               | endocrine/metabolic | 18758 | 261466   | 585.2   | Renal failure NOS                                             | genitourinary | 1430  | 234338   |
| 250.22  | Type 2 diabetes with renal manifestations                     | endocrine/metabolic | 213   | 261466   | 585.3   | Chronic renal failure [CKD]                                   | genitourinary | 5710  | 234338   |
| 250.23  | Type 2 diabetes with ophthalmic manifestations                | endocrine/metabolic | 1355  | 261466   | 585.31  | Renal dialysis                                                | genitourinary | 507   | 234338   |
| 250.24  | Type 2 diabetes with neurological manifestations              | endocrine/metabolic | 598   | 261466   | 585.32  | End stage renal disease                                       | genitourinary | 426   | 234338   |
| 250.4   | Abnormal glucose                                              | endocrine/metabolic | 678   | 261466   | 585.33  | Chronic Kidney Disease, Stage III                             | genitourinary | 3054  | 234338   |
| 250.41  | Impaired fasting glucose                                      | endocrine/metabolic | 288   | 261466   | 585.34  | Chronic Kidney Disease, Stage IV                              | genitourinary | 455   | 234338   |
| 250.42  | Other abnormal glucose                                        | endocrine/metabolic | 391   | 261466   | 585.4   | Chronic kidney disease, Stage I or II                         | genitourinary | 343   | 234338   |
| 250.6   | Polyneuropathy in diabetes                                    | endocrine/metabolic | 408   | 261466   | 586     | Other disorders of the kidney & ureters                       | genitourinary | 3536  | 234338   |
| 250.7   | Diabetic retinopathy                                          | endocrine/metabolic | 1398  | 254478   | 586.1   | Anatomical abnormalities of kidney & ureters                  | genitourinary | 232   | 234338   |
| 251.1   | Hypoglycemia                                                  | endocrine/metabolic | 1024  | 261466   | 586.11  | Small kidney                                                  | genitourinary | 200   | 234338   |
| 252     | Disorders of parathyroid gland                                | endocrine/metabolic | 940   | 261466   | 586.2   | Cyst of kidney, acquired                                      | genitourinary | 1393  | 234338   |
| 252.1   | Hyperparathyroidism                                           | endocrine/metabolic | 830   | 261466   | 586.4   | Stricture/obstruction of ureter                               | genitourinary | 936   | 234338   |
| 253     | Disorders of the pituitary gland & its hypothalamic control   | endocrine/metabolic | 697   | 261466   | 587     | Kidney replaced by transplant                                 | genitourinary | 334   | 234338   |
| 253.2   | Pituitary hypofunction                                        | endocrine/metabolic | 261   | 261466   | 590     | Pyelonephritis                                                | genitourinary | 1361  | 234338   |
| 255     | Disorders of adrenal glands                                   | endocrine/metabolic | 636   | 261466   | 591     | Urinary tract infection                                       | genitourinary | 12543 | 234338   |
| 255.2   | Adrenal hypofunction                                          | endocrine/metabolic | 363   | 261466   | 592     | Cystitis & urethritis                                         | genitourinary | 2885  | 234338   |
| 255.21  | Glucocorticoid deficiency                                     | endocrine/metabolic | 363   | 261466   | 592.1   | Cystitis                                                      | genitourinary | 2766  | 234338   |
| 256     | Ovarian dysfunction                                           | endocrine/metabolic | 241   | 143689   | 592.12  | Chronic cystitis                                              | genitourinary | 833   | 234338   |
| 256.4   | Polycystic ovaries                                            | endocrine/metabolic | 200   | 143689   | 592.13  | Chronic interstitial cystitis                                 | genitourinary | 233   | 234338   |
| 260     | Protein-calorie malnutrition                                  | endocrine/metabolic | 275   | 261466   | 593     | Hematuria                                                     | genitourinary | 14542 | 234338   |
| 260.6   | Anorexia                                                      | endocrine/metabolic | 885   | 261466   | 594     | Urinary calculus                                              | genitourinary | 6165  | 234338   |
| 261     | Vitamin deficiency                                            | endocrine/metabolic | 1684  | 261466   | 594.1   | Calculus of kidney                                            | genitourinary | 3198  | 234338   |
| 261.2   | Vitamin B-complex deficiencies                                | endocrine/metabolic | 911   | 261466   | 594.2   | Calculus of lower urinary tract                               | genitourinary | 767   | 234338   |
| 261.4   | Vitamin D deficiency                                          | endocrine/metabolic | 788   | 261466   | 594.3   | Calculus of ureter                                            | genitourinary | 2243  | 234338   |
| 262     | Mineral deficiency NEC                                        | endocrine/metabolic | 298   | 261466   | 594.8   | Renal colic                                                   | genitourinary | 1754  | 234338   |
| 269     | Proteinuria                                                   | endocrine/metabolic | 324   | 261466   | 595     | Hydronephrosis                                                | genitourinary | 2075  | 234338   |
| 270     | Disorders of protein plasma/amino-acid transport & metabolism | endocrine/metabolic | 365   | 261466   | 596     | Other disorders of bladder                                    | genitourinary | 9275  | 234338   |
| 270.3   | Disorders of plasma protein metabolism                        | endocrine/metabolic | 321   | 261466   | 596.1   | Bladder neck obstruction                                      | genitourinary | 1831  | 234338   |
| 270.32  | Paraproteinemia                                               | endocrine/metabolic | 246   | 261466   | 596.5   | Functional disorders of bladder                               | genitourinary | 1431  | 234338   |
| 272     | Disorders of lipid metabolism                                 | endocrine/metabolic | 35143 | 261466   | 597     | Other disorders of urethra & urinary tract                    | genitourinary | 3888  | 234338   |
| 272.1   | Hyperlipidemia                                                | endocrine/metabolic | 35033 | 261466   | 597.1   | Urethral stricture (not specified as infectious)              | genitourinary | 3159  | 234338   |
| 272.11  | Hypercholesterolemia                                          | endocrine/metabolic | 32554 | 261466   | 598     | Abnormal findings on examination of urine                     | genitourinary | 3286  | 234338   |
| 272.9   | Unspecified disorder of lipid metabolism                      | endocrine/metabolic | 251   | 261466   | 598.9   | Other nonspecific findings on examination of urine            | genitourinary | 299   | 234338   |
| 274     | Gout & other crystal arthropathies                            | endocrine/metabolic | 4155  | 261466   | 599     | Other symptoms/disorders or the urinary system                | genitourinary | 17536 | 234338   |
| 274.1   | Gout                                                          | endocrine/metabolic | 3587  | 261466   | 599.2   | Retention of urine                                            | genitourinary | 7478  | 234338   |
| 274.2   | Crystal arthropathies                                         | endocrine/metabolic | 628   | 261466   | 599.3   | Dysuria                                                       | genitourinary | 1104  | 234338   |
| 274.21  | Chondrocalcinosis                                             | endocrine/metabolic | 557   | 261466   | 599.4   | Urinary incontinence                                          | genitourinary | 8031  | 234338   |
| 275     | Disorders of mineral metabolism                               | endocrine/metabolic | 2470  | 261466   | 599.5   | Frequency of urination & polyuria                             | genitourinary | 3626  | 234338   |
| 275.1   | Disorders of iron metabolism                                  | hematopoietic       | 661   | 309446   | 599.9   | Other abnormality of urination                                | genitourinary | 1683  | 234338   |
| 275.3   | Disorders of magnesium metabolism                             | endocrine/metabolic | 543   | 261466   | 600     | Hyperplasia of prostate                                       | genitourinary | 11447 | 114193   |
| 275.5   | Disorders of calcium/phosphorus metabolism                    | endocrine/metabolic | 1454  | 261466   | 601     | Inflammatory diseases of prostate                             | genitourinary | 2119  | 114193   |
| 275.53  | Disorders of phosphorus metabolism                            | endocrine/metabolic | 273   | 261466   | 601.1   | Prostatitis                                                   | genitourinary | 1527  | 114193   |
| 276     | Disorders of fluid, electrolyte, & acid-base balance          | endocrine/metabolic | 7916  | 261466   | 601.11  | Acute prostatitis                                             | genitourinary | 231   | 114193   |
| 276.1   | Electrolyte imbalance                                         | endocrine/metabolic | 5081  | 261466   | 601.12  | Chronic prostatitis                                           | genitourinary | 908   | 114193   |
| 276.11  | Hyperosmolality &/or hypernatremia                            | endocrine/metabolic | 323   | 261466   | 601.4   | Balanoposthitis                                               | genitourinary | 283   | 114193   |
| 276.12  | Hypoosmolality &/or hyponatremia                              | endocrine/metabolic | 2295  | 261466   | 601.8   | Other inflammatory disorders of male genital organs           | genitourinary | 291   | 114193   |
| 276.13  | Hyperpotassemia                                               | endocrine/metabolic | 1176  | 261466   | 602     | Other disorders of prostate                                   | genitourinary | 1292  | 114193   |
| 276.14  | Hypopotassemia                                                | endocrine/metabolic | 1781  | 261466   | 603     | Other disorders of testis                                     | genitourinary | 2075  | 117407   |
| 276.4   | Acid-base balance disorder                                    | endocrine/metabolic | 1421  | 261466   | 603.1   | Hydrocele                                                     | genitourinary | 1274  | 117407   |
| 276.41  | Acidosis                                                      | endocrine/metabolic | 1278  | 261466   | 604     | Disorders of penis                                            | genitourinary | 3185  | 117407   |
| 276.5   | Hypovolemia                                                   | endocrine/metabolic | 3349  | 261466   | 604.1   | Redundant prepuce & phimosis/BXO                              | genitourinary | 2635  | 117407   |
| 276.6   | Fluid overload                                                | endocrine/metabolic | 615   | 261466   | 604.3   | Peyronie's disease                                            | genitourinary | 752   | 117407   |
| 277     | Other disorders of metabolism                                 | endocrine/metabolic | 1034  | 261466   | 605     | Erectile dysfunction [ED]                                     | genitourinary | 482   | 117407   |
| 277.4   | Disorders of bilirubin excretion                              | endocrine/metabolic | 383   | 261466   | 608     | Other disorders of male genital organs                        | genitourinary | 2620  | 117407   |
| 277.5   | Other disorders of lipid metabolism                           | endocrine/metabolic | 256   | 261466   | 610     | Benign mammary dysplasias                                     | genitourinary | 2479  | 116931   |
| 278     | Overweight, obesity & other hyperalimentionation              | endocrine/metabolic | 12786 | 261466   | 610.1   | Cystic mastopathy                                             | genitourinary | 805   | 116931   |
| 278.1   | Obesity                                                       | endocrine/metabolic | 12646 | 261466   | 610.2   | Fibro adenosis of breast                                      | genitourinary | 275   | 116931   |
| 279     | Disorders involving the immune mechanism                      | endocrine/metabolic | 271   | 261466   | 610.3   | Fibrosclerosis of breast                                      | genitourinary | 266   | 116931   |
| 279.1   | Immunity deficiency                                           | endocrine/metabolic | 223   | 261466   | 610.4   | Benign neoplasm of breast                                     | genitourinary | 1353  | 116931   |
| 279.7   | Other immunological findings                                  | endocrine/metabolic | 239   | 261466   | 610.8   | Other specified benign mammary dysplasias                     | genitourinary | 644   | 116931   |
| 280     | Iron deficiency anemias                                       | hematopoietic       | 8403  | 310388   | 611     | Abnormal findings on mammogram or breast exam                 | genitourinary | 1363  | 234338   |
| 280.1   | Iron deficiency anemias, unspecified or not due to blood loss | hematopoietic       | 8022  | 310388   | 611.3   | Lump or mass in breast                                        | genitourinary | 1305  | 234338   |
| 280.2   | Iron deficiency anemia secondary to blood loss (chronic)      | hematopoietic       | 436   | 310388   | 612     | Breast conditions, congenital or relating to hormones         | genitourinary | 788   | 234338   |
| 281     | Other deficiency anemia                                       | hematopoietic       | 1150  | 310388   | 612.2   | Hypertrophy of breast (Gynecomastia)                          | genitourinary | 715   | 234338   |
| 281.1   | Megaloblastic anemia                                          | hematopoietic       | 1093  | 310388   | 613     | Other nonmalignant breast conditions                          | genitourinary | 1712  | 234338   |
| 281.11  | Pernicious anemia                                             | hematopoietic       | 769   | 310388   | 613.1   | Inflammatory disease of breast                                | genitourinary | 615   | 234338   |
| 281.13  | Folate-deficiency anemia                                      | hematopoietic       | 200   | 310388   | 613.7   | Other signs & symptoms in breast                              | genitourinary | 614   | 234338   |
| 284     | Aplastic anemia                                               | hematopoietic       | 480   | 310388   | 613.8   | Other specified disorders of breast                           | genitourinary | 289   | 234338   |



| Phocode | Description                                                                       | Group            | Cases | Controls | Phocode | Description                                                                   | Group                   | Cases | Controls |
|---------|-----------------------------------------------------------------------------------|------------------|-------|----------|---------|-------------------------------------------------------------------------------|-------------------------|-------|----------|
| 285     | Other anemias                                                                     | hematopoietic    | 12234 | 310388   | 614     | Inflammatory diseases of female pelvic organs                                 | genitourinary           | 5602  | 116931   |
| 285.1   | Acute post hemorrhagic anemia                                                     | hematopoietic    | 237   | 310388   | 614.1   | Pelvic peritoneal adhesions, female (postoperative) (post infection)          | genitourinary           | 2293  | 116931   |
| 285.2   | Anemia of chronic disease                                                         | hematopoietic    | 736   | 310388   | 614.3   | Pelvic inflammatory disease (PID)                                             | genitourinary           | 802   | 116931   |
| 285.22  | Anemia in neoplastic disease                                                      | hematopoietic    | 433   | 310388   | 614.32  | Chronic inflammatory pelvic disease                                           | genitourinary           | 352   | 116931   |
| 286     | Coagulation defects                                                               | hematopoietic    | 1023  | 310388   | 614.33  | Pelvic inflammatory disease, NOS                                              | genitourinary           | 308   | 116931   |
| 286.1   | Congenital coagulation defects                                                    | hematopoietic    | 442   | 310388   | 614.4   | Inflammatory diseases of uterus, except cervix                                | genitourinary           | 245   | 116931   |
| 286.12  | Congenital deficiency of other clotting factors (including factor VII)            | hematopoietic    | 278   | 310388   | 614.5   | Inflammatory disease of cervix, vagina, & vulva                               | genitourinary           | 2642  | 116931   |
| 286.7   | Other & unspecified coagulation defects                                           | hematopoietic    | 411   | 310388   | 614.51  | Cervicitis & endocervicitis                                                   | genitourinary           | 1116  | 116931   |
| 287     | Purpura & other hemorrhagic conditions                                            | hematopoietic    | 1804  | 310388   | 614.52  | Vaginitis & vulvovaginitis                                                    | genitourinary           | 591   | 116931   |
| 287.3   | Thrombocytopenia                                                                  | hematopoietic    | 1667  | 310388   | 614.53  | Cyst or abscess of Bartholin's gland                                          | genitourinary           | 658   | 116931   |
| 287.31  | Primary thrombocytopenia                                                          | hematopoietic    | 415   | 310388   | 614.54  | Abscess or ulceration of vulva                                                | genitourinary           | 228   | 116931   |
| 288     | Diseases of white blood cells                                                     | hematopoietic    | 697   | 310388   | 615     | Endometriosis                                                                 | genitourinary           | 3495  | 116931   |
| 288.1   | Decreased white blood cell count                                                  | hematopoietic    | 3267  | 310388   | 617     | Disorders secondary to childbirth, surgery, trauma                            | genitourinary           | 1252  | 234338   |
| 288.11  | Neutropenia                                                                       | hematopoietic    | 3267  | 310388   | 618     | Genital prolapse                                                              | genitourinary           | 10694 | 116931   |
| 289     | Other diseases of blood & blood-forming organs                                    | hematopoietic    | 954   | 310388   | 618.1   | Prolapse of vaginal walls                                                     | genitourinary           | 6724  | 116931   |
| 289.3   | Personal history of diseases of blood & blood-forming organs                      | hematopoietic    | 318   | 310388   | 618.2   | Uterine/Uterovaginal prolapse                                                 | genitourinary           | 4836  | 116931   |
| 289.4   | Lymphadenitis                                                                     | hematopoietic    | 2636  | 310388   | 618.5   | Prolapse of vaginal vault after hysterectomy                                  | genitourinary           | 459   | 116931   |
| 289.5   | Diseases of spleen                                                                | hematopoietic    | 514   | 310388   | 618.6   | Vaginal enterocele, congenital or acquired                                    | genitourinary           | 629   | 116931   |
| 289.8   | Polycythemia, secondary                                                           | hematopoietic    | 315   | 310063   | 619     | Noninflammatory female genital disorders                                      | genitourinary           | 8298  | 116931   |
| 290     | Delirium dementia & amnestic & other cognitive disorders                          | mental disorders | 2856  | 262912   | 619.1   | Noninflammatory disorders of ovary, fallopian tube, & broad ligament          | genitourinary           | 683   | 116931   |
| 290.1   | Dementias                                                                         | mental disorders | 1583  | 262912   | 619.2   | Disorders of uterus, NEC                                                      | genitourinary           | 3020  | 116931   |
| 290.11  | Alzheimer's disease                                                               | mental disorders | 666   | 262912   | 619.3   | Noninflammatory disorders of cervix                                           | genitourinary           | 2536  | 116931   |
| 290.13  | Senile dementia                                                                   | mental disorders | 847   | 262912   | 619.4   | Noninflammatory disorders of vagina                                           | genitourinary           | 1535  | 116931   |
| 290.16  | Vascular dementia                                                                 | mental disorders | 361   | 262912   | 619.5   | Noninflammatory disorders of vulva & perineum                                 | genitourinary           | 1209  | 116931   |
| 290.2   | Delirium due to conditions classified elsewhere                                   | mental disorders | 1157  | 262912   | 621     | Endometrial hyperplasia                                                       | genitourinary           | 970   | 116931   |
| 291     | Other specified nonpsychotic and/or transient mental disorders                    | mental disorders | 693   | 262912   | 622     | Polyp of female genital organs                                                | genitourinary           | 9429  | 116931   |
| 291.8   | Alteration of consciousness                                                       | mental disorders | 484   | 262912   | 622.1   | Polyp of corpus uteri                                                         | genitourinary           | 6913  | 116931   |
| 292     | Neurological disorders                                                            | mental disorders | 5218  | 262912   | 622.2   | Mucous polyp of cervix                                                        | genitourinary           | 2951  | 116931   |
| 292.1   | Aphasia/speech disturbance                                                        | mental disorders | 1626  | 262912   | 623     | Hypertrophy of female genital organs                                          | genitourinary           | 1089  | 116931   |
| 292.2   | Mild cognitive impairment                                                         | mental disorders | 248   | 262912   | 624     | Symptoms involving female genital tract                                       | genitourinary           | 805   | 116931   |
| 292.3   | Memory loss                                                                       | mental disorders | 730   | 262912   | 624.1   | Dystrophy of female genital tract                                             | genitourinary           | 254   | 116931   |
| 292.4   | Altered mental status                                                             | mental disorders | 2527  | 262912   | 624.2   | Atrophy of female genital tract                                               | genitourinary           | 440   | 116931   |
| 292.6   | Hallucinations                                                                    | mental disorders | 350   | 262912   | 624.9   | stress incontinence, female                                                   | genitourinary           | 5074  | 116931   |
| 293     | Symptoms involving head & neck                                                    | mental disorders | 1929  | 262912   | 625     | Pain & other symptoms associated with female genital organs                   | genitourinary           | 2526  | 116931   |
| 293.1   | Swelling, mass, or lump in head & neck [Space-occupying lesion, intracranial NOS] | mental disorders | 832   | 262912   | 625.1   | Dyspareunia                                                                   | genitourinary           | 1007  | 116931   |
| 295     | Schizophrenia & other psychotic disorders                                         | mental disorders | 793   | 262912   | 626     | Disorders of menstruation & other abnormal bleeding from female genital tract | genitourinary           | 15577 | 116931   |
| 295.1   | Schizophrenia                                                                     | mental disorders | 513   | 262912   | 626.1   | Irregular menstrual cycle/bleeding                                            | genitourinary           | 13278 | 116931   |
| 296     | Mood disorders                                                                    | mental disorders | 13263 | 262912   | 626.12  | Excessive or frequent menstruation                                            | genitourinary           | 8228  | 116931   |
| 296.1   | Bipolar                                                                           | mental disorders | 1015  | 262912   | 626.13  | Irregular menstrual cycle                                                     | genitourinary           | 1646  | 116931   |
| 296.2   | Depression                                                                        | mental disorders | 12701 | 262912   | 626.14  | Irregular menstrual bleeding                                                  | genitourinary           | 3244  | 116931   |
| 296.22  | Major depressive disorder                                                         | mental disorders | 12629 | 262912   | 626.2   | Dysmenorrhea                                                                  | genitourinary           | 1487  | 116931   |
| 297     | Suicidal ideation or attempt                                                      | mental disorders | 1529  | 262912   | 626.8   | Infertility, female                                                           | genitourinary           | 1139  | 116931   |
| 297.2   | Suicide or self-inflicted injury                                                  | mental disorders | 1457  | 262912   | 627     | Menopausal & postmenopausal disorders                                         | genitourinary           | 9346  | 116931   |
| 300     | Anxiety disorders                                                                 | mental disorders | 8295  | 262912   | 627.1   | Postmenopausal bleeding                                                       | genitourinary           | 7915  | 116931   |
| 300.1   | Anxiety disorder                                                                  | mental disorders | 7701  | 262912   | 627.3   | Postmenopausal atrophic vaginitis                                             | genitourinary           | 1078  | 116931   |
| 300.12  | Agoraphobia, social phobia, & panic disorder                                      | mental disorders | 820   | 262912   | 627.4   | Premenopausal menorrhagia                                                     | genitourinary           | 252   | 116931   |
| 300.13  | Phobia                                                                            | mental disorders | 649   | 262912   | 628     | Ovarian cyst                                                                  | genitourinary           | 4147  | 116931   |
| 301     | Personality disorders                                                             | mental disorders | 338   | 262912   | 634     | Miscarriage; stillbirth                                                       | pregnancy complications | 4525  | 169668   |
| 302     | Sexual & gender identity disorders                                                | mental disorders | 279   | 262912   | 634.1   | Missed abortion/Hydatidiform mole                                             | pregnancy complications | 1038  | 169668   |
| 303     | Psychogenic & somatoform disorders                                                | mental disorders | 457   | 262912   | 634.3   | Ectopic pregnancy                                                             | pregnancy complications | 272   | 169668   |
| 303.3   | Psychogenic disorder                                                              | mental disorders | 339   | 262912   | 635     | Hemorrhage during pregnancy; childbirth & postpartum                          | pregnancy complications | 1680  | 169668   |
| 304     | Adjustment reaction                                                               | mental disorders | 258   | 262912   | 635.2   | Antepartum hemorrhage, abruptio placentae, & placenta previa                  | pregnancy complications | 739   | 169668   |
| 306     | Other mental disorder                                                             | mental disorders | 39468 | 262912   | 635.3   | Placenta previa & abruptio placenta                                           | pregnancy complications | 1054  | 169668   |
| 306.9   | Tension headache                                                                  | mental disorders | 280   | 262912   | 636     | Early or threatened labor; hemorrhage in early pregnancy                      | pregnancy complications | 2079  | 169668   |
| 315     | Developmental delays & disorders                                                  | mental disorders | 563   | 262912   | 636.2   | Early onset of delivery                                                       | pregnancy complications | 508   | 169668   |
| 316     | Substance addiction & disorders                                                   | mental disorders | 412   | 262912   | 636.3   | Hemorrhage in early pregnancy                                                 | pregnancy complications | 872   | 169668   |
| 317     | Alcohol-related disorders                                                         | mental disorders | 12721 | 262912   | 642     | Hypertension complicating pregnancy, childbirth, & the puerperium             | pregnancy complications | 946   | 169668   |
| 317.1   | Alcoholism                                                                        | mental disorders | 10886 | 262912   | 642.1   | Preeclampsia & eclampsia                                                      | pregnancy complications | 259   | 169668   |
| 317.11  | Alcoholic liver damage                                                            | mental disorders | 837   | 262912   | 644     | Anemia during pregnancy                                                       | pregnancy complications | 677   | 169668   |
| 318     | Tobacco use disorder                                                              | mental disorders | 18403 | 262912   | 645     | Late pregnancy & failed induction                                             | pregnancy complications | 1054  | 325859   |
| 320     | Meningitis                                                                        | neurological     | 391   | 295570   | 646     | Other complications of pregnancy NEC                                          | pregnancy complications | 1868  | 169668   |
| 323     | Encephalitis                                                                      | neurological     | 349   | 295570   | 647.1   | Infections of genitourinary tract during pregnancy                            | pregnancy complications | 226   | 169668   |
| 324     | Other CNS infection & poliomyelitis                                               | neurological     | 305   | 295570   | 650     | Normal delivery                                                               | pregnancy complications | 1568  | 325859   |
| 327     | Sleep disorders                                                                   | neurological     | 1210  | 295570   | 651     | Multiple gestation                                                            | pregnancy complications | 299   | 325859   |
| 327.3   | Sleep apnea                                                                       | neurological     | 4435  | 295570   | 652     | Malposition & malpresentation of fetus or obstruction                         | pregnancy complications | 1428  | 325859   |

| Phocode | Description                                                     | Group        | Cases | Controls | Phocode | Description                                                                                          | Group                   | Cases | Controls |
|---------|-----------------------------------------------------------------|--------------|-------|----------|---------|------------------------------------------------------------------------------------------------------|-------------------------|-------|----------|
| 331     | Other cerebral degenerations                                    | neurological | 1287  | 295570   | 653     | Problems associated with amniotic cavity & membranes                                                 | pregnancy complications | 1257  | 169668   |
| 331.1   | Hydrocephalus                                                   | neurological | 515   | 295570   | 654.1   | Abnormality of organs & soft tissues of pelvis complicating pregnancy, childbirth, or the puerperium | pregnancy complications | 1034  | 169668   |
| 331.9   | Cerebral degeneration, unspecified                              | neurological | 514   | 295570   | 654.2   | Rhesus isoimmunization in pregnancy                                                                  | pregnancy complications | 258   | 169668   |
| 332     | Parkinson's disease                                             | neurological | 1345  | 295570   | 655     | Known or suspected fetal abnormality affecting management of mother                                  | pregnancy complications | 3585  | 169668   |
| 333     | Extrapyramidal disease & abnormal movement disorders            | neurological | 1094  | 295570   | 656     | Other perinatal conditions of fetus or newborn                                                       | pregnancy complications | 499   | 325859   |
| 333.1   | Essential tremor                                                | neurological | 271   | 295570   | 661     | Fetal distress & abnormal forces of labor                                                            |                         | 1819  | 325859   |
| 333.4   | Torsion dystonia                                                | neurological | 265   | 295570   | 663     | Umbilical cord complications during labor & delivery                                                 |                         | 511   | 325859   |
| 334     | Degenerative disease of the spinal cord                         | neurological | 1896  | 295570   | 665     | Obstetrical/birth trauma                                                                             | pregnancy complications | 4394  | 325859   |
| 334.2   | Anterior horn cell disease                                      | neurological | 277   | 295570   | 669     | Complications of labor & delivery NEC                                                                | pregnancy complications | 2212  | 169668   |
| 335     | Multiple sclerosis                                              | neurological | 1222  | 295570   | 674     | Other complications of the puerperium NEC                                                            | pregnancy complications | 217   | 169668   |
| 337     | Disorders of the autonomic nervous system                       | neurological | 355   | 295570   | 681     | Superficial cellulitis & abscess                                                                     | dermatologic            | 7381  | 289596   |
| 338     | Pain                                                            | neurological | 742   | 295570   | 681.1   | Cellulitis & abscess of fingers/toes                                                                 | dermatologic            | 550   | 289596   |
| 338.1   | Acute pain                                                      | neurological | 363   | 295570   | 681.2   | Cellulitis & abscess of face/neck                                                                    | dermatologic            | 509   | 289596   |
| 338.2   | Chronic pain                                                    | neurological | 387   | 295570   | 681.3   | Cellulitis & abscess of arm/hand                                                                     | dermatologic            | 5521  | 289596   |
| 339     | Other headache syndromes                                        | neurological | 7243  | 295570   | 681.5   | Cellulitis & abscess of leg, except foot                                                             | dermatologic            | 5524  | 289596   |
| 340     | Migraine                                                        | neurological | 2962  | 295570   | 681.6   | Cellulitis & abscess of foot, toe                                                                    | dermatologic            | 5489  | 289596   |
| 340.1   | Migrain with aura                                               | neurological | 217   | 295570   | 681.7   | Cellulitis & abscess of trunk                                                                        | dermatologic            | 623   | 289596   |
| 341     | Other demyelinating diseases of central nervous system          | neurological | 221   | 295570   | 686     | Other local infections of skin & subcutaneous tissue                                                 | dermatologic            | 1364  | 289596   |
| 342     | Hemiplegia                                                      | neurological | 1600  | 295570   | 686.1   | Carbuncle & furuncle                                                                                 | dermatologic            | 2170  | 289596   |
| 344     | Other paralytic syndromes                                       | neurological | 658   | 295570   | 686.3   | Pilonidal cyst                                                                                       | dermatologic            | 510   | 289596   |
| 345     | Epilepsy, recurrent seizures, convulsions                       | neurological | 4890  | 295570   | 686.4   | Pyogenic granuloma                                                                                   | dermatologic            | 337   | 289596   |
| 345.1   | Epilepsy                                                        | neurological | 877   | 295570   | 687     | Symptoms affecting skin                                                                              | dermatologic            | 1302  | 289596   |
| 345.11  | Generalized convulsive epilepsy                                 | neurological | 423   | 295570   | 687.1   | Rash & other nonspecific skin eruption                                                               | dermatologic            | 2100  | 289596   |
| 345.12  | Partial epilepsy                                                | neurological | 273   | 295570   | 687.2   | Localized superficial swelling, mass, or lump                                                        | dermatologic            | 947   | 289596   |
| 345.3   | Convulsions                                                     | neurological | 2204  | 295570   | 687.4   | Disturbance of skin sensation                                                                        | dermatologic            | 2787  | 289596   |
| 348     | Other conditions of brain                                       | neurological | 854   | 295570   | 689     | Disorder of skin & subcutaneous tissue NOS                                                           | dermatologic            | 5767  | 289596   |
| 348.2   | Cerebral edema & compression of brain                           | neurological | 280   | 295570   | 690     | Erythematous dermatosis                                                                              | dermatologic            | 3042  | 289596   |
| 348.7   | Coma                                                            | neurological | 338   | 295570   | 690.1   | Seborrheic dermatitis                                                                                | dermatologic            | 3024  | 289596   |
| 348.8   | Encephalopathy, not elsewhere classified                        | neurological | 267   | 295570   | 694     | Dyschromia & Vitiligo                                                                                | dermatologic            | 952   | 289596   |
| 348.9   | Other conditions of brain, NOS                                  | neurological | 440   | 295570   | 694.2   | Other dyschromia                                                                                     | dermatologic            | 762   | 289596   |
| 349     | Other & unspecified disorders of the nervous system             | neurological | 403   | 295570   | 695     | Erythematous conditions                                                                              | dermatologic            | 2344  | 289596   |
| 350     | Abnormal movement                                               | neurological | 3488  | 295570   | 695.3   | Rosacea                                                                                              | dermatologic            | 312   | 289596   |
| 350.1   | Abnormal involuntary movements                                  | neurological | 968   | 295570   | 695.4   | Lupus (localized & systemic)                                                                         | dermatologic            | 391   | 288757   |
| 350.2   | Abnormality of gait                                             | neurological | 2371  | 295570   | 695.42  | Systemic lupus erythematosus                                                                         | dermatologic            | 324   | 288757   |
| 350.3   | Lack of coordination                                            | neurological | 368   | 295570   | 695.7   | Prurigo & Lichen                                                                                     | dermatologic            | 724   | 289596   |
| 351     | Other peripheral nerve disorders                                | neurological | 11404 | 295570   | 695.8   | Other specified erythematous conditions                                                              | dermatologic            | 231   | 289596   |
| 352     | Disorders of other cranial nerves                               | neurological | 1378  | 295570   | 695.9   | Unspecified erythematous condition                                                                   | dermatologic            | 486   | 289596   |
| 352.1   | Trigeminal nerve disorders [CN5]                                | neurological | 485   | 295570   | 696     | Psoriasis & related disorders                                                                        | dermatologic            | 2369  | 286399   |
| 352.2   | Facial nerve disorders [CN7]                                    | neurological | 842   | 295570   | 696.4   | Psoriasis                                                                                            | dermatologic            | 2308  | 286399   |
| 353     | Nerve root & plexus disorders                                   | neurological | 2069  | 295570   | 696.41  | Psoriasis vulgaris                                                                                   | dermatologic            | 1756  | 286399   |
| 355     | Complex regional/central pain syndrome                          | neurological | 329   | 295570   | 696.42  | Psoriatic arthropathy                                                                                | dermatologic            | 711   | 286399   |
| 357     | Inflammatory & toxic neuropathy                                 | neurological | 1558  | 295570   | 697     | Sarcoidosis                                                                                          | dermatologic            | 522   | 289596   |
| 358     | Myoneural disorders                                             | neurological | 210   | 295570   | 698     | Pruritus & related conditions                                                                        | dermatologic            | 767   | 289596   |
| 359     | Muscular dystrophies & other myopathies                         | neurological | 439   | 295570   | 700     | Corns & callosities                                                                                  | dermatologic            | 280   | 289596   |
| 359.2   | Myopathy                                                        | neurological | 337   | 295570   | 701     | Other hypertrophic & atrophic conditions of skin                                                     | dermatologic            | 4868  | 289596   |
| 360     | Disorders of the globe                                          | sense organs | 315   | 287331   | 701.2   | Scar conditions & fibrosis of skin                                                                   | dermatologic            | 2159  | 289596   |
| 360.2   | Progressive myopia                                              | sense organs | 227   | 287331   | 701.3   | Circumscribed scleroderma                                                                            | dermatologic            | 478   | 289596   |
| 361     | Retinal detachments & defects                                   | sense organs | 3118  | 287331   | 701.4   | Keloid scar                                                                                          | dermatologic            | 205   | 289596   |
| 361.1   | Retinal detachment with retinal defect                          | sense organs | 1401  | 287331   | 701.5   | Abnormal granulation tissue                                                                          | dermatologic            | 447   | 289596   |
| 362     | Other retinal disorders                                         | sense organs | 5021  | 286896   | 702     | Degenerative skin conditions & other dermatoses                                                      | dermatologic            | 5494  | 289596   |
| 362.2   | Degeneration of macula & posterior pole of retina               | sense organs | 2640  | 286896   | 702.1   | Actinic keratosis                                                                                    | dermatologic            | 2726  | 289596   |
| 362.29  | Macular degeneration (senile) of retina NOS                     | sense organs | 2637  | 286896   | 702.2   | Seborrheic keratosis                                                                                 | dermatologic            | 2973  | 289596   |
| 362.3   | Other nondiabetic retinopathy                                   | sense organs | 1059  | 286896   | 703     | Diseases of nail, NOS                                                                                | dermatologic            | 345   | 289596   |
| 362.31  | Separation of retinal layers                                    | sense organs | 1003  | 286896   | 703.1   | Ingrown nail                                                                                         | dermatologic            | 837   | 289596   |
| 362.4   | Retinal vascular changes & abnormalities                        | sense organs | 872   | 286896   | 704     | Diseases of hair & hair follicles                                                                    | dermatologic            | 4724  | 289596   |
| 364     | Corneal opacity & other disorders of cornea                     | sense organs | 751   | 287331   | 705.8   | Hyperhidrosis                                                                                        | dermatologic            | 569   | 289596   |
| 364.4   | Corneal degenerations                                           | sense organs | 240   | 287331   | 706     | Diseases of sebaceous glands                                                                         | dermatologic            | 7950  | 289596   |
| 364.5   | Corneal dystrophy                                               | sense organs | 236   | 287331   | 706.2   | Sebaceous cyst                                                                                       | dermatologic            | 7878  | 289596   |
| 365     | Glaucoma                                                        | sense organs | 4986  | 287331   | 707     | Chronic ulcer of skin                                                                                | dermatologic            | 2310  | 289596   |
| 365.1   | Open-angle glaucoma                                             | sense organs | 1216  | 287331   | 707.1   | Decubitus ulcer                                                                                      | dermatologic            | 1184  | 289596   |
| 365.11  | Primary open angle glaucoma                                     | sense organs | 1212  | 287331   | 707.2   | Chronic ulcer of leg or foot                                                                         | dermatologic            | 1199  | 289596   |
| 365.2   | Primary angle-closure glaucoma                                  | sense organs | 742   | 287331   | 709     | Diffuse diseases of connective tissue                                                                | dermatologic            | 3306  | 289596   |
| 366     | Cataract                                                        | sense organs | 22347 | 287331   | 709.2   | Sicca syndrome                                                                                       | dermatologic            | 512   | 289596   |
| 366.2   | Senile cataract                                                 | sense organs | 9863  | 287331   | 709.7   | Unspecified diffuse connective tissue disease                                                        | dermatologic            | 2592  | 289596   |
| 367     | Disorders of refraction & accommodation; blindness & low vision | sense organs | 2886  | 287331   | 710     | Osteomyelitis, periostitis, & other infections involving bone                                        | musculoskeletal         | 620   | 295120   |
| 367.1   | Myopia                                                          | sense organs | 1422  | 287331   | 710.1   | Osteomyelitis                                                                                        | musculoskeletal         | 602   | 295120   |
| 367.2   | Astigmatism                                                     | sense organs | 225   | 287331   | 710.19  | Unspecified osteomyelitis                                                                            | musculoskeletal         | 444   | 295120   |
| 367.8   | Hypermetropia                                                   | sense organs | 278   | 287331   | 711     | Arthropathy associated with infections                                                               | musculoskeletal         | 433   | 295120   |
| 367.9   | Blindness & low vision                                          | sense organs | 950   | 287331   | 711.1   | Pyogenic arthritis                                                                                   | musculoskeletal         | 333   | 295120   |
| 368     | Visual disturbances                                             | sense organs | 3085  | 287331   | 714     | Rheumatoid arthritis & other inflammatory polyarthropathies                                          | musculoskeletal         | 4896  | 294409   |
| 368.1   | Amblyopia                                                       | sense organs | 607   | 287331   | 714.1   | Rheumatoid arthritis                                                                                 | musculoskeletal         | 4369  | 294409   |
| 368.2   | Diplopia & disorders of binocular vision                        | sense organs | 723   | 287331   | 715     | Other inflammatory spondylopathies                                                                   | musculoskeletal         | 1641  | 294409   |
| 368.4   | Visual field defects                                            | sense organs | 370   | 287331   | 715.2   | Ankylosing spondylitis                                                                               | musculoskeletal         | 399   | 294409   |
| 368.9   | Subjective visual disturbances                                  | sense organs | 635   | 287331   | 716     | Other arthropathies                                                                                  | musculoskeletal         | 38203 | 295120   |
| 368.91  | Psychophysical visual disturbances                              | sense organs | 222   | 287331   | 716.2   | Unspecified monoarthritis                                                                            | musculoskeletal         | 16046 | 295120   |
| 369     | Infection of the eye                                            | sense organs | 574   | 287331   | 716.9   | Arthropathy NOS                                                                                      | musculoskeletal         | 38053 | 295120   |

| Phocode | Description                                                       | Group              | Cases | Controls | Phocode | Description                                                                            | Group                | Cases | Controls |
|---------|-------------------------------------------------------------------|--------------------|-------|----------|---------|----------------------------------------------------------------------------------------|----------------------|-------|----------|
| 369.5   | Conjunctivitis, infectious                                        | sense organs       | 241   | 287331   | 717     | Polymyalgia Rheumatica                                                                 | musculoskeletal      | 1354  | 336121   |
| 370     | Keratitis                                                         | sense organs       | 283   | 287331   | 720     | Spinal stenosis                                                                        | musculoskeletal      | 4105  | 322347   |
| 371     | Inflammation of the eye                                           | sense organs       | 2760  | 287331   | 721     | Spondylosis & allied disorders                                                         | musculoskeletal      | 8311  | 322347   |
| 371.1   | Uveitis, noninfectious or NOS                                     | sense organs       | 485   | 287331   | 721.1   | Spondylosis without myelopathy                                                         | musculoskeletal      | 7917  | 322347   |
| 371.3   | Inflammation of eyelids                                           | sense organs       | 2161  | 287331   | 721.2   | Spondylosis with myelopathy                                                            | musculoskeletal      | 204   | 322347   |
| 372     | Disorders of conjunctiva                                          | sense organs       | 731   | 287331   | 721.8   | Other allied disorders of spine                                                        | musculoskeletal      | 384   | 322347   |
| 374     | Other disorders of eyelids                                        | sense organs       | 5327  | 287331   | 722     | Intervertebral disc disorders                                                          | musculoskeletal      | 6764  | 322347   |
| 374.1   | Ectropion or entropion                                            | sense organs       | 1101  | 287331   | 722.1   | Displacement of intervertebral disc                                                    | musculoskeletal      | 495   | 322347   |
| 374.3   | Ptosis of eyelid                                                  | sense organs       | 1725  | 287331   | 722.6   | Degeneration of intervertebral disc                                                    | musculoskeletal      | 2865  | 322347   |
| 375     | Disorders of lacrimal system                                      | sense organs       | 2085  | 287331   | 722.7   | Intervertebral disc disorder with myelopathy                                           | musculoskeletal      | 398   | 322347   |
| 375.2   | Epiphora                                                          | sense organs       | 840   | 287331   | 722.9   | Other & unspecified disc disorder                                                      | musculoskeletal      | 4097  | 322347   |
| 377     | Disorders of optic nerve & visual pathways                        | sense organs       | 438   | 287331   | 723     | Other disorders of cervical region                                                     | musculoskeletal      | 537   | 322347   |
| 377.3   | Optic neuritis/neuropathy                                         | sense organs       | 234   | 287331   | 724     | Other & unspecified disorders of back                                                  | musculoskeletal      | 1156  | 322347   |
| 378     | Strabismus & other disorders of binocular eye movements           | sense organs       | 1329  | 287331   | 724.1   | Disorders of sacrum                                                                    | musculoskeletal      | 358   | 322347   |
| 378.1   | Strabismus (not specified as paralytic)                           | sense organs       | 836   | 287331   | 724.2   | Disorders of coccyx                                                                    | musculoskeletal      | 361   | 322347   |
| 378.2   | Nystagmus & other irregular eye movements                         | sense organs       | 209   | 287331   | 724.9   | Other unspecified back disorders                                                       | musculoskeletal      | 723   | 322347   |
| 378.5   | Paralytic strabismus                                              | sense organs       | 264   | 287331   | 726     | Peripheral enthesopathies & allied syndromes                                           | musculoskeletal      | 14369 | 306383   |
| 379     | Other disorders of eye                                            | sense organs       | 4107  | 287331   | 726.1   | Enthesopathy                                                                           | musculoskeletal      | 9643  | 306383   |
| 379.2   | Disorders of vitreous body                                        | sense organs       | 1443  | 287331   | 726.2   | Synoviopathy                                                                           | musculoskeletal      | 527   | 306383   |
| 379.3   | Aphakia & other disorders of lens                                 | sense organs       | 2166  | 287331   | 726.3   | Bursitis                                                                               | musculoskeletal      | 822   | 306383   |
| 379.5   | Disorders of iris & ciliary body                                  | sense organs       | 371   | 287331   | 726.4   | Calcaneal spur; Exostosis NOS                                                          | musculoskeletal      | 3462  | 306383   |
| 380     | Disorders of external ear                                         | sense organs       | 614   | 287331   | 727     | Other disorders of synovium, tendon, & bursa                                           | musculoskeletal      | 12755 | 306383   |
| 380.1   | Otitis externa                                                    | sense organs       | 478   | 287331   | 727.1   | Synovitis & tenosynovitis                                                              | musculoskeletal      | 5004  | 306383   |
| 380.4   | Impacted cerumen                                                  | sense organs       | 323   | 287331   | 727.4   | Ganglion & cyst of synovium, tendon, & bursa                                           | musculoskeletal      | 2903  | 306383   |
| 381     | Otitis media & Eustachian tube disorders                          | sense organs       | 2003  | 287331   | 727.5   | Rupture of synovium                                                                    | musculoskeletal      | 587   | 306383   |
| 381.1   | Otitis media                                                      | sense organs       | 1613  | 287331   | 727.6   | Rupture of tendon, nontraumatic                                                        | musculoskeletal      | 3877  | 306383   |
| 381.11  | Suppurative & unspecified otitis media                            | sense organs       | 739   | 287331   | 728     | Disorders of muscle, ligament, & fascia                                                | musculoskeletal      | 832   | 306383   |
| 381.9   | Otorrhea                                                          | sense organs       | 242   | 287331   | 728.2   | Laxity of ligament or hypermobility syndrome                                           | musculoskeletal      | 402   | 306383   |
| 382     | Otalgia                                                           | sense organs       | 288   | 287331   | 728.7   | Fasciitis                                                                              | musculoskeletal      | 3729  | 306383   |
| 383     | Otosclerosis                                                      | sense organs       | 275   | 287331   | 728.71  | Contracture of palmar fascia [Dupuytren's disease]                                     | musculoskeletal      | 3406  | 306383   |
| 384     | Other disorders of tympanic membrane                              | sense organs       | 1161  | 287331   | 729     | Other disorders of soft tissues                                                        | musculoskeletal      | 6003  | 306383   |
| 384.4   | Perforation of tympanic membrane                                  | sense organs       | 894   | 287331   | 729.1   | Rheumatism, unspecified & fibrositis                                                   | musculoskeletal      | 835   | 306383   |
| 385     | Other disorders of middle ear & mastoid                           | sense organs       | 768   | 287331   | 731     | Osteitis deformans & osteopathies associated with other disorders classified elsewhere | musculoskeletal      | 290   | 320016   |
| 385.3   | Cholesteatoma                                                     | sense organs       | 521   | 287331   | 731.1   | Osteitis deformans [Paget's disease of bone]                                           | musculoskeletal      | 239   | 320016   |
| 386     | Vertiginous syndromes & other disorders of vestibular system      | sense organs       | 1729  | 287331   | 732     | Osteochondropathies                                                                    | musculoskeletal      | 461   | 320016   |
| 386.1   | Meniere's disease                                                 | sense organs       | 559   | 287331   | 732.1   | Juvenile osteochondrosis                                                               | musculoskeletal      | 205   | 320016   |
| 386.2   | Peripheral or central vertigo                                     | sense organs       | 464   | 287331   | 733     | Other disorders of bone & cartilage                                                    | musculoskeletal      | 2100  | 320016   |
| 386.3   | Labyrinthitis                                                     | sense organs       | 710   | 287331   | 733.2   | Cyst of bone                                                                           | musculoskeletal      | 295   | 320016   |
| 386.9   | Dizziness & giddiness (Light-headedness & vertigo)                | sense organs       | 4685  | 287331   | 733.4   | Aseptic necrosis of bone                                                               | musculoskeletal      | 518   | 320016   |
| 389     | Hearing loss                                                      | sense organs       | 4810  | 287331   | 733.8   | Malunion & nonunion of fracture                                                        | musculoskeletal      | 1175  | 320016   |
| 389.1   | Sensorineural hearing loss                                        | sense organs       | 499   | 287331   | 735     | Acquired foot deformities                                                              | musculoskeletal      | 8929  | 324005   |
| 389.2   | Conductive hearing loss                                           | sense organs       | 412   | 287331   | 735.1   | Flat foot                                                                              | musculoskeletal      | 215   | 324005   |
| 389.4   | Tinnitus                                                          | sense organs       | 539   | 287331   | 735.2   | Acquired toe deformities                                                               | musculoskeletal      | 4749  | 324005   |
| 394     | Rheumatic disease of the heart valves                             | circulatory system | 5564  | 202269   | 735.21  | Hammer toe (acquired)                                                                  | musculoskeletal      | 1813  | 324005   |
| 394.1   | Mitral valve stenosis & aortic valve stenosis                     | circulatory system | 680   | 202269   | 735.23  | Hallux rigidus                                                                         | musculoskeletal      | 1423  | 324005   |
| 394.2   | Mitral valve disease                                              | circulatory system | 3323  | 202269   | 735.3   | Hallux valgus (Bunion)                                                                 | musculoskeletal      | 6000  | 324005   |
| 394.3   | Aortic valve disease                                              | circulatory system | 1453  | 202269   | 736     | Other acquired deformities of limbs                                                    | musculoskeletal      | 1764  | 324005   |
| 394.7   | Disease of tricuspid valve                                        | circulatory system | 1335  | 202269   | 736.2   | Acquired deformities of finger                                                         | musculoskeletal      | 234   | 324005   |
| 395     | Heart valve disorders                                             | circulatory system | 6317  | 202269   | 737     | Curvature of spine                                                                     | musculoskeletal      | 1419  | 324005   |
| 395.1   | Nonrheumatic mitral valve disorders                               | circulatory system | 3224  | 202269   | 737.1   | Kyphosis (acquired)                                                                    | musculoskeletal      | 213   | 324005   |
| 395.2   | Nonrheumatic aortic valve disorders                               | circulatory system | 2915  | 202269   | 737.3   | Kyphoscoliosis & scoliosis                                                             | musculoskeletal      | 1174  | 324005   |
| 395.6   | Heart valve replaced                                              | circulatory system | 1554  | 202269   | 738     | Other acquired musculoskeletal deformity                                               | musculoskeletal      | 1991  | 324005   |
| 396     | Abnormal heart sounds                                             | circulatory system | 1382  | 202269   | 738.4   | Acquired spondylolisthesis                                                             | musculoskeletal      | 1644  | 324005   |
| 401     | Hypertension                                                      | circulatory system | 75408 | 202269   | 739     | Contracture of joint                                                                   | musculoskeletal      | 496   | 324005   |
| 401.1   | Essential hypertension                                            | circulatory system | 75160 | 202269   | 740     | Osteoarthritis                                                                         | musculoskeletal      | 50335 | 287140   |
| 401.2   | Hypertensive heart and/or renal disease                           | circulatory system | 1667  | 202269   | 740.1   | Osteoarthritis, localized                                                              | musculoskeletal      | 31034 | 287140   |
| 401.21  | Hypertensive heart disease                                        | circulatory system | 395   | 202269   | 740.11  | Osteoarthritis, localized, primary                                                     | musculoskeletal      | 8866  | 287140   |
| 401.22  | Hypertensive chronic kidney disease                               | circulatory system | 1285  | 202269   | 740.12  | Osteoarthritis, localized, secondary                                                   | musculoskeletal      | 634   | 287140   |
| 402     | Elevated blood pressure reading without diagnosis of hypertension | circulatory system | 1464  | 202269   | 740.2   | Osteoarthritis, generalized                                                            | musculoskeletal      | 4353  | 287140   |
| 411     | Ischemic Heart Disease                                            | circulatory system | 30489 | 202269   | 740.9   | Osteoarthritis NOS                                                                     | musculoskeletal      | 28265 | 287140   |
| 411.1   | Unstable angina (intermediate coronary syndrome)                  | circulatory system | 4478  | 202269   | 741     | Symptoms & disorders of the joints                                                     | musculoskeletal      | 3744  | 331152   |
| 411.2   | Myocardial infarction                                             | circulatory system | 12033 | 202269   | 741.2   | Stiffness of joint                                                                     | musculoskeletal      | 590   | 331152   |
| 411.3   | Angina pectoris                                                   | circulatory system | 15180 | 202269   | 741.4   | Joint effusions                                                                        | musculoskeletal      | 1400  | 331152   |
| 411.4   | Coronary atherosclerosis                                          | circulatory system | 19684 | 202269   | 742     | Derangement of joint, non-traumatic                                                    | musculoskeletal      | 2856  | 331152   |
| 411.41  | Aneurysm & dissection of heart                                    | circulatory system | 735   | 202269   | 742.1   | Loose body in joint                                                                    | musculoskeletal      | 297   | 331152   |
| 411.8   | Other chronic ischemic heart disease, unspecified                 | circulatory system | 15139 | 202269   | 742.2   | Pathological, developmental or recurrent dislocation                                   | musculoskeletal      | 383   | 331152   |
| 411.9   | Other acute & subacute forms of ischemic heart disease            | circulatory system | 1423  | 202269   | 742.8   | Articular cartilage disorder                                                           | musculoskeletal      | 970   | 331152   |
| 414     | Other forms of chronic heart disease                              | circulatory system | 2245  | 202269   | 742.9   | Other derangement of joint                                                             | musculoskeletal      | 2384  | 331152   |
| 415     | Pulmonary heart disease                                           | circulatory system | 4937  | 202269   | 743     | Osteoporosis, osteopenia & pathological fracture                                       | musculoskeletal      | 7552  | 329923   |
| 415.2   | Chronic pulmonary heart disease                                   | circulatory system | 976   | 202269   | 743.1   | Osteoporosis                                                                           | musculoskeletal      | 6241  | 329923   |
| 415.21  | Primary pulmonary hypertension                                    | circulatory system | 414   | 202269   | 743.11  | Osteoporosis NOS                                                                       | musculoskeletal      | 6220  | 329923   |
| 416     | Cardiomegaly                                                      | circulatory system | 3070  | 202269   | 743.2   | Pathologic fracture                                                                    | musculoskeletal      | 571   | 329923   |
| 418     | Nonspecific chest pain                                            | circulatory system | 26417 | 202269   | 743.21  | Pathologic fracture of vertebrae                                                       | musculoskeletal      | 325   | 329923   |
| 418.1   | Precordial pain                                                   | circulatory system | 3619  | 202269   | 743.9   | Osteopenia or other disorder of bone & cartilage                                       | musculoskeletal      | 836   | 329923   |
| 420     | Carditis                                                          | circulatory system | 2276  | 202269   | 745     | Pain in joint                                                                          | musculoskeletal      | 7733  | 329742   |
| 420.2   | Pericarditis                                                      | circulatory system | 1431  | 202269   | 747     | Cardiac & circulatory congenital anomalies                                             | congenital anomalies | 3002  | 329064   |
| 420.21  | Acute pericarditis                                                | circulatory system | 209   | 202269   | 747.1   | Cardiac congenital anomalies                                                           | congenital anomalies | 2826  | 329064   |
| 420.3   | Endocarditis                                                      | circulatory system | 764   | 202269   | 747.11  | Cardiac shunt/ heart septal defect                                                     | congenital anomalies | 576   | 329064   |
| 425     | Cardiomyopathy                                                    | circulatory system | 1363  | 202269   | 747.12  | Valvular heart disease/ heart chambers                                                 | congenital anomalies | 270   | 329064   |
| 425.1   | Primary/intrinsic cardiomyopathies                                | circulatory system | 1307  | 202269   | 747.13  | Congenital anomalies of great vessels                                                  | congenital anomalies | 2015  | 329064   |
| 426     | Cardiac conduction disorders                                      | circulatory system | 7651  | 202269   | 749     | Congenital anomalies of face & neck                                                    | congenital anomalies | 295   | 329064   |

| Phecode | Description                                               | Group              | Cases | Controls | Phecode | Description                                                                                     | Group                 | Cases | Controls |
|---------|-----------------------------------------------------------|--------------------|-------|----------|---------|-------------------------------------------------------------------------------------------------|-----------------------|-------|----------|
| 426.2   | Atrioventricular [AV] block                               | circulatory system | 2459  | 202269   | 750     | Digestive congenital anomalies                                                                  | congenital anomalies  | 706   | 329064   |
| 426.21  | First degree AV block                                     | circulatory system | 1220  | 202269   | 750.1   | Upper gastrointestinal congenital anomalies                                                     | congenital anomalies  | 351   | 329064   |
| 426.23  | Second degree AV block                                    | circulatory system | 508   | 202269   | 750.13  | Congenital anomalies of mouth/tongue                                                            | congenital anomalies  | 204   | 329064   |
| 426.24  | Atrioventricular block, complete                          | circulatory system | 659   | 202269   | 750.2   | Lower gastrointestinal congenital anomalies                                                     | congenital anomalies  | 348   | 329064   |
| 426.3   | Bundle branch block                                       | circulatory system | 3818  | 202269   | 750.21  | Congenital anomalies of intestine                                                               | congenital anomalies  | 222   | 329064   |
| 426.31  | Right bundle branch block                                 | circulatory system | 1758  | 202269   | 751     | Genitourinary congenital anomalies                                                              | congenital anomalies  | 1465  | 329064   |
| 426.32  | Left bundle branch block                                  | circulatory system | 2030  | 202269   | 751.1   | Congenital anomalies of genital organs                                                          | congenital anomalies  | 633   | 329064   |
| 426.4   | Anomalous atrioventricular excitation                     | circulatory system | 210   | 202269   | 751.11  | Congenital anomalies of female genital organs                                                   | congenital anomalies  | 392   | 176821   |
| 426.9   | Cardiac pacemaker/device in situ                          | circulatory system | 2715  | 202269   | 751.12  | Congenital anomalies of male genital organs                                                     | congenital anomalies  | 205   | 152243   |
| 426.91  | Cardiac pacemaker in situ                                 | circulatory system | 2511  | 202269   | 751.2   | Congenital anomalies of urinary system                                                          | congenital anomalies  | 801   | 329064   |
| 427     | Cardiac dysrhythmias                                      | circulatory system | 25228 | 202269   | 751.21  | Cystic kidney disease                                                                           | congenital anomalies  | 394   | 329064   |
| 427.1   | Paroxysmal tachycardia, unspecified                       | circulatory system | 3202  | 202269   | 751.22  | Other specified congenital anomalies of kidney                                                  | congenital anomalies  | 333   | 329064   |
| 427.11  | Paroxysmal supraventricular tachycardia                   | circulatory system | 2326  | 202269   | 752     | Nervous system congenital anomalies                                                             | congenital anomalies  | 1689  | 329064   |
| 427.12  | Paroxysmal ventricular tachycardia                        | circulatory system | 956   | 202269   | 752.1   | Neural tube defects                                                                             | congenital anomalies  | 1613  | 329064   |
| 427.2   | Atrial fibrillation & flutter                             | circulatory system | 15491 | 202269   | 754     | Congenital musculoskeletal deformities of spine                                                 | congenital anomalies  | 1491  | 329064   |
| 427.21  | Atrial fibrillation                                       | circulatory system | 983   | 202269   | 755     | Congenital anomalies of limbs                                                                   | congenital anomalies  | 432   | 329064   |
| 427.3   | Other specified cardiac dysrhythmias                      | circulatory system | 3400  | 202269   | 755.1   | Congenital deformities of feet                                                                  | congenital anomalies  | 222   | 329064   |
| 427.4   | Cardiac arrest & ventricular fibrillation                 | circulatory system | 1324  | 202269   | 756     | Other congenital musculoskeletal anomalies                                                      | congenital anomalies  | 590   | 329064   |
| 427.41  | Ventricular fibrillation & flutter                        | circulatory system | 365   | 202269   | 756.5   | Congenital osteodystrophy                                                                       | congenital anomalies  | 425   | 329064   |
| 427.42  | Cardiac arrest                                            | circulatory system | 1121  | 202269   | 759     | Other & unspecified congenital anomalies                                                        | congenital anomalies  | 223   | 329064   |
| 427.5   | Arrhythmia (cardiac) NOS                                  | circulatory system | 998   | 202269   | 760     | Back pain                                                                                       | symptoms              | 10889 | 257697   |
| 427.6   | Premature beats                                           | circulatory system | 837   | 202269   | 761     | Cervicalgia                                                                                     | symptoms              | 1764  | 257697   |
| 427.7   | Tachycardia NOS                                           | circulatory system | 2398  | 202269   | 764     | Sciatica                                                                                        | symptoms              | 2339  | 257697   |
| 427.8   | Sinoatrial node dysfunction (Bradycardia)                 | circulatory system | 484   | 202269   | 765     | Cervical radiculitis                                                                            | symptoms              | 505   | 257697   |
| 427.9   | Palpitations                                              | circulatory system | 3694  | 202269   | 766     | Neuralgia, neuritis, & radiculitis NOS                                                          | symptoms              | 1265  | 257697   |
| 428     | Congestive heart failure; nonhypertensive                 | circulatory system | 6185  | 202269   | 770     | Myalgia & myositis unspecified                                                                  | symptoms              | 1789  | 257697   |
| 428.1   | Congestive heart failure (CHF) NOS                        | circulatory system | 3650  | 202269   | 771     | Musculoskeletal symptoms referable to limbs                                                     | symptoms              | 776   | 257697   |
| 428.2   | Heart failure NOS                                         | circulatory system | 4914  | 202269   | 771.1   | Swelling of limb                                                                                | symptoms              | 4680  | 257697   |
| 429     | Ill-defined descriptions & complications of heart disease | circulatory system | 756   | 202269   | 772     | Symptoms of the muscles                                                                         | symptoms              | 676   | 257697   |
| 429.2   | Abnormal function study of cardiovascular system          | circulatory system | 553   | 202269   | 773     | Pain in limb                                                                                    | symptoms              | 5984  | 257697   |
| 430     | Intracranial hemorrhage                                   | circulatory system | 1984  | 202269   | 780     | Hypothermia/Chills                                                                              | symptoms              | 212   | 257697   |
| 430.1   | Subarachnoid hemorrhage                                   | circulatory system | 816   | 202269   | 781     | Symptoms involving nervous & musculoskeletal systems                                            | symptoms              | 9086  | 257697   |
| 430.2   | Intracerebral hemorrhage                                  | circulatory system | 855   | 202269   | 782.3   | Edema                                                                                           | symptoms              | 1941  | 257697   |
| 430.3   | Subdural hemorrhage                                       | circulatory system | 308   | 202269   | 783     | Fever of unknown origin                                                                         | symptoms              | 3998  | 257697   |
| 433     | Cerebrovascular disease                                   | circulatory system | 9077  | 202269   | 785     | Abdominal pain                                                                                  | symptoms              | 37426 | 257697   |
| 433.1   | Occlusion & stenosis of precerebral arteries              | circulatory system | 1354  | 202269   | 788     | Syncope & collapse                                                                              | symptoms              | 9030  | 257697   |
| 433.12  | Cerebral atherosclerosis                                  | circulatory system | 270   | 202269   | 789     | Nausea & vomiting                                                                               | symptoms              | 11420 | 257697   |
| 433.2   | Occlusion of cerebral arteries                            | circulatory system | 4355  | 202269   | 790.6   | Other abnormal blood chemistry                                                                  | symptoms              | 6857  | 257697   |
| 433.21  | Cerebral artery occlusion, with cerebral infarction       | circulatory system | 4193  | 202269   | 791     | Gangrene                                                                                        | symptoms              | 645   | 257697   |
| 433.3   | Cerebral ischemia                                         | circulatory system | 3089  | 202269   | 793.2   | Nonspecific abnormal findings on radiological & other examination of other intrathoracic organs | symptoms              | 608   | 257697   |
| 433.31  | Transient cerebral ischemia                               | circulatory system | 2115  | 202269   | 798     | Malaise & fatigue                                                                               | symptoms              | 3438  | 257697   |
| 433.5   | Cerebral aneurysm                                         | circulatory system | 364   | 202269   | 798.1   | Chronic fatigue syndrome                                                                        | symptoms              | 607   | 257697   |
| 433.8   | Late effects of cerebrovascular disease                   | circulatory system | 1333  | 202269   | 800     | Fracture of lower limb                                                                          | injuries & poisonings | 6862  | 243043   |
| 440     | Atherosclerosis                                           | circulatory system | 1453  | 202269   | 800.1   | Fracture of neck of femur                                                                       | injuries & poisonings | 1926  | 243043   |
| 440.2   | Atherosclerosis of the extremities                        | circulatory system | 848   | 202269   | 800.2   | Fracture of unspecified part of femur                                                           | injuries & poisonings | 888   | 243043   |
| 440.9   | Atherosclerosis of aorta                                  | circulatory system | 331   | 202269   | 800.3   | Fracture of tibia & fibula                                                                      | injuries & poisonings | 1976  | 243043   |
| 441     | Vascular insufficiency of intestine                       | circulatory system | 701   | 202269   | 800.4   | Fracture of patella                                                                             | injuries & poisonings | 689   | 243043   |
| 441.1   | Acute vascular insufficiency of intestine                 | circulatory system | 321   | 202269   | 801     | Fracture of ankle & foot                                                                        | injuries & poisonings | 1992  | 243043   |
| 442     | Other aneurysm                                            | circulatory system | 2079  | 202269   | 801.1   | Fracture of foot                                                                                | injuries & poisonings | 1220  | 243043   |
| 442.1   | Aortic aneurysm                                           | circulatory system | 1632  | 202269   | 802     | Fracture of pelvis                                                                              | injuries & poisonings | 759   | 243043   |
| 442.11  | Abdominal aortic aneurysm                                 | circulatory system | 1047  | 202269   | 803     | Fracture of upper limb                                                                          | injuries & poisonings | 8356  | 243043   |
| 442.8   | Aneurysm of other specified artery                        | circulatory system | 218   | 202269   | 803.1   | Fracture of humerus                                                                             | injuries & poisonings | 1610  | 243043   |
| 443     | Peripheral vascular disease                               | circulatory system | 4031  | 202269   | 803.2   | Fracture of radius & ulna                                                                       | injuries & poisonings | 5165  | 243043   |
| 443.1   | Raynaud's syndrome                                        | circulatory system | 1162  | 202269   | 803.3   | Fracture of clavicle or scapula                                                                 | injuries & poisonings | 1581  | 243043   |
| 443.7   | Peripheral angiopathy in diseases classified elsewhere    | circulatory system | 397   | 202269   | 804     | Fracture of hand or wrist                                                                       | injuries & poisonings | 3156  | 243043   |
| 443.9   | Peripheral vascular disease, unspecified                  | circulatory system | 2679  | 202269   | 805     | Fracture of vertebral column without mention of spinal cord injury                              | injuries & poisonings | 1685  | 243043   |
| 444     | Arterial embolism & thrombosis                            | circulatory system | 903   | 202269   | 807     | Fracture of ribs                                                                                | injuries & poisonings | 1555  | 243043   |
| 444.1   | Arterial embolism & thrombosis of lower extremity artery  | circulatory system | 560   | 202269   | 809     | Fracture of unspecified bones                                                                   | injuries & poisonings | 10448 | 243043   |
| 446     | Polyarteritis nodosa & allied conditions                  | circulatory system | 857   | 202269   | 817     | Concussion                                                                                      | injuries & poisonings | 219   | 243043   |
| 446.5   | Giant cell arteritis                                      | circulatory system | 417   | 202269   | 818     | Intracranial hemorrhage (injury)                                                                | injuries & poisonings | 667   | 243043   |
| 446.9   | Arteritis NOS                                             | circulatory system | 258   | 202269   | 819     | Skull & face fracture & other intracranial injury                                               | injuries & poisonings | 2986  | 243043   |
| 447     | Other disorders of arteries & arterioles                  | circulatory system | 1320  | 202269   | 830     | Dislocation                                                                                     | injuries & poisonings | 1954  | 243043   |
| 447.1   | Stricture of artery                                       | circulatory system | 858   | 202269   | 835     | Internal derangement of knee                                                                    | injuries & poisonings | 13967 | 243043   |
| 450     | Noninfectious disorders of lymphatic channels             | circulatory system | 805   | 202269   | 836     | Traumatic arthropathy                                                                           | injuries & poisonings | 498   | 243043   |
| 451     | Phlebitis & thrombophlebitis                              | circulatory system | 3916  | 202269   | 840     | Sprains & strains                                                                               | injuries & poisonings | 866   | 243043   |
| 451.2   | Phlebitis & thrombophlebitis of lower extremities         | circulatory system | 3612  | 202269   | 840.3   | Joint/ligament sprain                                                                           | injuries & poisonings | 457   | 243043   |
| 452     | Other venous embolism & thrombosis                        | circulatory system | 598   | 202269   | 850     | Hemorrhage or hematoma complicating a procedure                                                 | injuries & poisonings | 5032  | 243043   |
| 454     | Varicose veins                                            | circulatory system | 10793 | 202269   | 851     | Complications of transplants & reattached limbs                                                 | injuries & poisonings | 17270 | 243043   |
| 454.1   | Varicose veins of lower extremity                         | circulatory system | 10333 | 202269   | 853     | Complication of colostomy or enterostomy                                                        | injuries & poisonings | 494   | 243043   |
| 454.11  | Varicose veins of lower extremity, symptomatic            | circulatory system | 716   | 202269   | 854     | Complications of cardiac/vascular device, implant, & graft                                      | injuries & poisonings | 2535  | 243043   |
| 455     | Hemorrhoids                                               | circulatory system | 23176 | 202269   | 857     | Mechanical complication of unspecified genitourinary device, implant, & graft                   | injuries & poisonings | 1436  | 243043   |
| 456     | Chronic venous insufficiency [CVI]                        | circulatory system | 224   | 202269   | 858     | Complication of internal orthopedic device                                                      | injuries & poisonings | 3502  | 243043   |
| 458     | Hypotension                                               | circulatory system | 6659  | 202269   | 859     | Complication due to other implant & internal device                                             | injuries & poisonings | 3509  | 243043   |

| Phecode | Description                                                         | Group              | Cases | Controls | Phecode | Description                                                                            | Group                 | Cases | Controls |
|---------|---------------------------------------------------------------------|--------------------|-------|----------|---------|----------------------------------------------------------------------------------------|-----------------------|-------|----------|
| 458.1   | Orthostatic hypotension                                             | circulatory system | 1622  | 202269   | 870     | Open wounds of head; neck; & trunk                                                     | injuries & poisonings | 3784  | 243043   |
| 458.2   | Iatrogenic hypotension                                              | circulatory system | 250   | 202269   | 870.1   | Open wound or laceration of eye or eyelid                                              | injuries & poisonings | 522   | 243043   |
| 458.9   | Hypotension NOS                                                     | circulatory system | 4073  | 202269   | 870.3   | Other open wound of head & face                                                        | injuries & poisonings | 2938  | 243043   |
| 459     | Other disorders of circulatory system                               | circulatory system | 17142 | 202269   | 870.4   | Open wound of nose & sinus                                                             | injuries & poisonings | 247   | 243043   |
| 459.9   | Circulatory disease NEC                                             | circulatory system | 16931 | 202269   | 870.5   | Open wound of lip & mouth                                                              | injuries & poisonings | 374   | 243043   |
| 465     | Acute upper respiratory infections of multiple or unspecified sites | respiratory        | 2223  | 269389   | 871     | Open wounds of extremities                                                             | injuries & poisonings | 4405  | 243043   |
| 465.2   | Acute pharyngitis                                                   | respiratory        | 841   | 269389   | 872     | Traumatic amputation                                                                   | injuries & poisonings | 435   | 243043   |
| 470     | Septal Deviations/Turbinate Hypertrophy                             | respiratory        | 4226  | 269389   | 873     | Broken tooth                                                                           | injuries & poisonings | 250   | 243043   |
| 471     | Nasal polyps                                                        | respiratory        | 2933  | 269389   | 907     | Injuries to the nervous system                                                         | injuries & poisonings | 1285  | 243043   |
| 472     | Chronic pharyngitis & nasopharyngitis                               | respiratory        | 906   | 269389   | 915     | Superficial injury without mention of infection                                        | injuries & poisonings | 4691  | 243043   |
| 473     | Diseases of the larynx & vocal cords                                | respiratory        | 2414  | 269389   | 916     | Contusion                                                                              | injuries & poisonings | 1533  | 243043   |
| 473.3   | Paralysis/spasm of vocal cords or larynx                            | respiratory        | 263   | 269389   | 938     | Dermatitis due to solar radiation                                                      | dermatologic          | 368   | 288850   |
| 473.4   | Voice disturbance                                                   | respiratory        | 972   | 269389   | 938.2   | Chronic dermatitis due to solar radiation                                              | dermatologic          | 256   | 288850   |
| 474     | Acute & chronic tonsillitis                                         | respiratory        | 1762  | 269389   | 939     | Atopic/contact dermatitis due to other or unspecified                                  | dermatologic          | 2227  | 288850   |
| 474.1   | Acute tonsillitis                                                   | respiratory        | 552   | 269389   | 941     | Adverse reaction to serum or vaccine                                                   | injuries & poisonings | 259   | 241796   |
| 474.2   | Chronic tonsillitis & adenoiditis                                   | respiratory        | 971   | 269389   | 946     | Anaphylactic shock NOS                                                                 | injuries & poisonings | 527   | 241796   |
| 475     | Chronic sinusitis                                                   | respiratory        | 2395  | 269389   | 947     | Urticaria                                                                              | dermatologic          | 541   | 288850   |
| 476     | Allergic rhinitis                                                   | respiratory        | 1225  | 269389   | 949     | Allergies, other                                                                       | injuries & poisonings | 397   | 241796   |
| 477     | Epistaxis or throat hemorrhage                                      | respiratory        | 2412  | 269389   | 958     | Certain early complications of trauma or procedure                                     | injuries & poisonings | 531   | 243043   |
| 478     | Throat pain                                                         | respiratory        | 338   | 269389   | 960     | Poisoning by antibiotics                                                               | injuries & poisonings | 18479 | 243043   |
| 479     | Other upper respiratory disease                                     | respiratory        | 3786  | 269389   | 960.2   | Allergy/adverse effect of penicillin                                                   | injuries & poisonings | 16028 | 243043   |
| 480     | Pneumonia                                                           | respiratory        | 11693 | 269389   | 961     | Poisoning by other anti-infectives                                                     | injuries & poisonings | 411   | 243043   |
| 480.1   | Bacterial pneumonia                                                 | respiratory        | 7555  | 269389   | 961.1   | Poisoning/allergy of sulfonamides                                                      | injuries & poisonings | 842   | 243043   |
| 480.11  | Pneumococcal pneumonia                                              | respiratory        | 6741  | 269389   | 962     | Poisoning by hormones & synthetic substitutes                                          | injuries & poisonings | 482   | 243043   |
| 480.5   | Bronchopneumonia & lung abscess                                     | respiratory        | 894   | 269389   | 962.3   | Hormones & synthetic substitutes causing adverse effects in therapeutic use            | injuries & poisonings | 357   | 243043   |
| 481     | Influenza                                                           | respiratory        | 418   | 269389   | 963     | Poisoning by primarily systemic agents                                                 | injuries & poisonings | 2626  | 243043   |
| 483     | Acute bronchitis & bronchiolitis                                    | respiratory        | 227   | 269389   | 964     | Poisoning by agents primarily affecting blood constituents                             | injuries & poisonings | 391   | 243043   |
| 495     | Asthma                                                              | respiratory        | 24896 | 269389   | 964.1   | Anticoagulants causing adverse effects                                                 | injuries & poisonings | 298   | 243043   |
| 495.2   | Asthma with exacerbation                                            | respiratory        | 229   | 269389   | 965     | Poisoning by analgesics, antipyretics, & antirheumatics                                | injuries & poisonings | 6181  | 243043   |
| 496     | Chronic airway obstruction                                          | respiratory        | 11361 | 269389   | 965.1   | Opiates & related narcotics causing adverse effects in therapeutic use                 | injuries & poisonings | 1370  | 243043   |
| 496.1   | Emphysema                                                           | respiratory        | 1937  | 269389   | 965.3   | Salicylates causing adverse effects in therapeutic use                                 | injuries & poisonings | 378   | 243043   |
| 496.2   | Chronic bronchitis                                                  | respiratory        | 3258  | 269389   | 966     | Poisoning by anticonvulsants & anti-Parkinsonism drugs                                 | injuries & poisonings | 507   | 243043   |
| 496.21  | Obstructive chronic bronchitis                                      | respiratory        | 2997  | 269389   | 967     | Adverse effects of sedatives or other central nervous system depressants & anesthetics | injuries & poisonings | 515   | 243043   |
| 496.3   | Bronchiectasis                                                      | respiratory        | 2143  | 269389   | 969     | Poisoning by psychotropic agents                                                       | injuries & poisonings | 1748  | 243043   |
| 497     | Bronchitis                                                          | respiratory        | 647   | 269389   | 971     | Poisoning by drugs primarily affecting the autonomic nervous system                    | injuries & poisonings | 511   | 243043   |
| 500     | Lung disease due to external agents                                 | respiratory        | 459   | 269389   | 972     | Poisoning by agents primarily affecting the cardiovascular system                      | injuries & poisonings | 828   | 243043   |
| 500.2   | Pneumoconiosis                                                      | respiratory        | 273   | 269389   | 973     | Poisoning by agents primarily affecting the gastrointestinal system                    | injuries & poisonings | 211   | 243043   |
| 501     | Pneumonitis due to inhalation of food or vomitus                    | respiratory        | 852   | 269389   | 977     | Personal history of allergy to medicinal agents                                        | injuries & poisonings | 5864  | 243043   |
| 502     | Postinflammatory pulmonary fibrosis                                 | respiratory        | 1036  | 269389   | 979     | Adverse drug events & drug allergies                                                   | injuries & poisonings | 692   | 243043   |
| 503     | Pulmonary congestion & hypostasis                                   | respiratory        | 534   | 269389   | 981     | Toxic effect of (non-ethyl) alcohol & petroleum & other solvents                       | injuries & poisonings | 262   | 243043   |
| 504     | Other alveolar & parietoalveolar pneumonopathy                      | respiratory        | 389   | 269389   | 990     | Effects radiation NOS                                                                  | injuries & poisonings | 3850  | 243043   |
| 506     | Empyema & pneumothorax                                              | respiratory        | 1207  | 269389   | 994     | Sepsis & SIRS                                                                          | injuries & poisonings | 3970  | 243043   |
|         |                                                                     |                    |       |          | 994.2   | Sepsis                                                                                 | injuries & poisonings | 3970  | 243043   |

**Supplementary Table 5:** Power to detect associations with disease outcomes based on available numbers of cases, alpha 5%, instrument strength determined from the UK Biobank (PCSK9  $r^2=0.12\%$ ; HMGCR  $r^2=0.15\%$ ; NPC1L1  $r^2=0.026\%$ ; LDLR  $r^2=0.64\%$ ) and four different assumed effect sizes per 1mg/dL decrease in LDL-C (beta=0.2; beta=0.5; beta=1.0; beta=1.5). Phenotypes are listed by phecode number, as specified above in Supplementary Table 4.

| Phenotype | Cases, n | Controls, n | PCSK9             |                   |                   |                   | HMGCR             |                   |                   |                   | NPC1L1            |                   |                   |                   | LDLR              |                   |                   |                   |
|-----------|----------|-------------|-------------------|-------------------|-------------------|-------------------|-------------------|-------------------|-------------------|-------------------|-------------------|-------------------|-------------------|-------------------|-------------------|-------------------|-------------------|-------------------|
|           |          |             | Power at beta=0.2 | Power at beta=0.5 | Power at beta=1.0 | Power at beta=1.5 | Power at beta=0.2 | Power at beta=0.5 | Power at beta=1.0 | Power at beta=1.5 | Power at beta=0.2 | Power at beta=0.5 | Power at beta=1.0 | Power at beta=1.5 | Power at beta=0.2 | Power at beta=0.5 | Power at beta=1.0 | Power at beta=1.5 |
| 008       | 10361    | 304892      | 0.10              | 0.42              | 0.94              | 1.00              | 0.12              | 0.48              | 0.97              | 1.00              | 0.05              | 0.13              | 0.37              | 0.69              | 0.36              | 0.98              | 1.00              | 1.00              |
| 008.5     | 2546     | 304892      | 0.05              | 0.14              | 0.42              | 0.75              | 0.06              | 0.16              | 0.49              | 0.82              | 0.04              | 0.06              | 0.13              | 0.23              | 0.12              | 0.52              | 0.98              | 1.00              |
| 008.52    | 673      | 304892      | 0.04              | 0.07              | 0.15              | 0.28              | 0.04              | 0.07              | 0.17              | 0.32              | 0.03              | 0.04              | 0.06              | 0.09              | 0.06              | 0.18              | 0.54              | 0.87              |
| 008.6     | 903      | 304892      | 0.04              | 0.08              | 0.18              | 0.35              | 0.04              | 0.08              | 0.21              | 0.41              | 0.03              | 0.04              | 0.07              | 0.11              | 0.07              | 0.22              | 0.67              | 0.95              |
| 038       | 4885     | 304892      | 0.07              | 0.23              | 0.68              | 0.95              | 0.08              | 0.26              | 0.76              | 0.98              | 0.04              | 0.08              | 0.20              | 0.39              | 0.20              | 0.79              | 1.00              | 1.00              |
| 038.1     | 962      | 304892      | 0.04              | 0.08              | 0.19              | 0.37              | 0.04              | 0.09              | 0.22              | 0.43              | 0.03              | 0.04              | 0.07              | 0.11              | 0.07              | 0.23              | 0.70              | 0.96              |
| 038.2     | 506      | 304892      | 0.04              | 0.06              | 0.12              | 0.22              | 0.04              | 0.06              | 0.14              | 0.25              | 0.03              | 0.04              | 0.06              | 0.08              | 0.05              | 0.14              | 0.43              | 0.77              |
| 041       | 11864    | 304892      | 0.11              | 0.47              | 0.96              | 1.00              | 0.13              | 0.53              | 0.98              | 1.00              | 0.05              | 0.14              | 0.41              | 0.74              | 0.40              | 0.99              | 1.00              | 1.00              |
| 041.1     | 3057     | 304892      | 0.06              | 0.16              | 0.49              | 0.82              | 0.06              | 0.18              | 0.49              | 0.88              | 0.04              | 0.07              | 0.14              | 0.27              | 0.14              | 0.59              | 0.99              | 1.00              |
| 041.11    | 2191     | 304892      | 0.05              | 0.13              | 0.37              | 0.69              | 0.05              | 0.14              | 0.37              | 0.69              | 0.04              | 0.06              | 0.11              | 0.21              | 0.11              | 0.46              | 0.96              | 1.00              |
| 041.2     | 1659     | 304892      | 0.05              | 0.11              | 0.30              | 0.57              | 0.05              | 0.12              | 0.34              | 0.65              | 0.03              | 0.05              | 0.10              | 0.17              | 0.09              | 0.37              | 0.90              | 1.00              |
| 041.4     | 2977     | 304892      | 0.06              | 0.16              | 0.48              | 0.81              | 0.06              | 0.18              | 0.55              | 0.88              | 0.04              | 0.06              | 0.14              | 0.26              | 0.14              | 0.58              | 0.99              | 1.00              |
| 053       | 426      | 304892      | 0.03              | 0.05              | 0.11              | 0.19              | 0.04              | 0.06              | 0.12              | 0.22              | 0.03              | 0.04              | 0.05              | 0.07              | 0.05              | 0.13              | 0.38              | 0.69              |
| 054       | 207      | 304892      | 0.03              | 0.04              | 0.07              | 0.11              | 0.03              | 0.04              | 0.05              | 0.08              | 0.03              | 0.03              | 0.04              | 0.05              | 0.04              | 0.08              | 0.21              | 0.41              |
| 070       | 580      | 304892      | 0.04              | 0.06              | 0.13              | 0.24              | 0.04              | 0.07              | 0.15              | 0.28              | 0.03              | 0.04              | 0.06              | 0.08              | 0.06              | 0.16              | 0.48              | 0.82              |
| 070.3     | 237      | 304892      | 0.03              | 0.05              | 0.08              | 0.12              | 0.03              | 0.05              | 0.09              | 0.14              | 0.03              | 0.03              | 0.04              | 0.06              | 0.04              | 0.09              | 0.23              | 0.45              |
| 070.4     | 261      | 304892      | 0.03              | 0.05              | 0.08              | 0.13              | 0.03              | 0.05              | 0.09              | 0.15              | 0.03              | 0.03              | 0.04              | 0.06              | 0.04              | 0.09              | 0.25              | 0.49              |
| 070.9     | 476      | 304892      | 0.04              | 0.06              | 0.12              | 0.21              | 0.04              | 0.06              | 0.13              | 0.24              | 0.03              | 0.04              | 0.05              | 0.08              | 0.05              | 0.14              | 0.41              | 0.74              |
| 078       | 1176     | 304892      | 0.04              | 0.09              | 0.22              | 0.44              | 0.04              | 0.10              | 0.26              | 0.50              | 0.03              | 0.05              | 0.08              | 0.13              | 0.08              | 0.28              | 0.78              | 0.98              |
| 079       | 2704     | 304892      | 0.06              | 0.15              | 0.44              | 0.78              | 0.06              | 0.17              | 0.51              | 0.84              | 0.04              | 0.06              | 0.13              | 0.24              | 0.13              | 0.54              | 0.99              | 1.00              |
| 079.9     | 1577     | 304892      | 0.05              | 0.10              | 0.28              | 0.55              | 0.05              | 0.11              | 0.33              | 0.62              | 0.03              | 0.05              | 0.09              | 0.16              | 0.09              | 0.35              | 0.89              | 1.00              |
| 080       | 4201     | 304892      | 0.07              | 0.20              | 0.62              | 0.92              | 0.07              | 0.23              | 0.69              | 0.96              | 0.04              | 0.08              | 0.18              | 0.35              | 0.18              | 0.73              | 1.00              | 1.00              |
| 081       | 2438     | 304892      | 0.05              | 0.14              | 0.41              | 0.73              | 0.06              | 0.15              | 0.47              | 0.81              | 0.04              | 0.06              | 0.12              | 0.22              | 0.12              | 0.50              | 0.98              | 1.00              |
| 1000      | 511      | 336964      | 0.04              | 0.06              | 0.12              | 0.22              | 0.04              | 0.06              | 0.14              | 0.25              | 0.03              | 0.04              | 0.06              | 0.08              | 0.05              | 0.14              | 0.44              | 0.77              |
| 1001      | 1110     | 336365      | 0.04              | 0.08              | 0.21              | 0.42              | 0.04              | 0.09              | 0.25              | 0.48              | 0.03              | 0.05              | 0.08              | 0.13              | 0.08              | 0.26              | 0.76              | 0.98              |
| 1002      | 5846     | 331629      | 0.08              | 0.26              | 0.76              | 0.98              | 0.08              | 0.31              | 0.83              | 0.99              | 0.04              | 0.09              | 0.23              | 0.46              | 0.23              | 0.86              | 1.00              | 1.00              |
| 1004      | 444      | 337031      | 0.03              | 0.06              | 0.11              | 0.20              | 0.04              | 0.06              | 0.12              | 0.23              | 0.03              | 0.04              | 0.05              | 0.07              | 0.05              | 0.13              | 0.39              | 0.71              |
| 1005      | 1476     | 335999      | 0.05              | 0.10              | 0.27              | 0.52              | 0.05              | 0.11              | 0.31              | 0.60              | 0.03              | 0.05              | 0.09              | 0.15              | 0.09              | 0.33              | 0.86              | 1.00              |
| 1006      | 200      | 337275      | 0.03              | 0.04              | 0.07              | 0.11              | 0.03              | 0.05              | 0.08              | 0.13              | 0.03              | 0.03              | 0.04              | 0.05              | 0.04              | 0.08              | 0.20              | 0.39              |
| 1007      | 281      | 337194      | 0.03              | 0.05              | 0.08              | 0.14              | 0.03              | 0.05              | 0.09              | 0.16              | 0.03              | 0.03              | 0.05              | 0.06              | 0.05              | 0.10              | 0.27              | 0.52              |
| 1008      | 1051     | 336424      | 0.04              | 0.08              | 0.20              | 0.40              | 0.04              | 0.09              | 0.24              | 0.46              | 0.03              | 0.04              | 0.08              | 0.12              | 0.07              | 0.25              | 0.73              | 0.97              |
| 1009      | 7326     | 330149      | 0.09              | 0.32              | 0.84              | 0.99              | 0.09              | 0.37              | 0.90              | 1.00              | 0.05              | 0.10              | 0.28              | 0.54              | 0.27              | 0.92              | 1.00              | 1.00              |
| 1010      | 16572    | 320903      | 0.14              | 0.59              | 0.99              | 1.00              | 0.16              | 0.67              | 1.00              | 1.00              | 0.06              | 0.17              | 0.53              | 0.87              | 0.52              | 1.00              | 1.00              | 1.00              |
| 1011      | 10083    | 327392      | 0.10              | 0.41              | 0.93              | 1.00              | 0.11              | 0.47              | 0.97              | 1.00              | 0.05              | 0.12              | 0.36              | 0.68              | 0.35              | 0.98              | 1.00              | 1.00              |
| 1013      | 349      | 337126      | 0.03              | 0.05              | 0.10              | 0.16              | 0.03              | 0.05              | 0.11              | 0.19              | 0.03              | 0.04              | 0.05              | 0.07              | 0.05              | 0.11              | 0.32              | 0.61              |
| 1014      | 254      | 337221      | 0.03              | 0.05              | 0.08              | 0.13              | 0.03              | 0.05              | 0.09              | 0.15              | 0.03              | 0.03              | 0.04              | 0.06              | 0.04              | 0.09              | 0.25              | 0.48              |
| 1015      | 10460    | 327015      | 0.10              | 0.42              | 0.94              | 1.00              | 0.12              | 0.49              | 0.97              | 1.00              | 0.05              | 0.13              | 0.37              | 0.69              | 0.36              | 0.98              | 1.00              | 1.00              |
| 1019      | 13786    | 323689      | 0.12              | 0.52              | 0.98              | 1.00              | 0.14              | 0.60              | 0.99              | 1.00              | 0.06              | 0.15              | 0.46              | 0.80              | 0.45              | 1.00              | 1.00              | 1.00              |
| 110       | 294      | 304892      | 0.03              | 0.05              | 0.09              | 0.14              | 0.03              | 0.05              | 0.10              | 0.16              | 0.03              | 0.03              | 0.05              | 0.06              | 0.05              | 0.10              | 0.28              | 0.54              |
| 110.1     | 288      | 304892      | 0.03              | 0.05              | 0.09              | 0.14              | 0.03              | 0.05              | 0.10              | 0.16              | 0.03              | 0.03              | 0.05              | 0.06              | 0.05              | 0.10              | 0.27              | 0.53              |
| 1100      | 2277     | 335198      | 0.05              | 0.13              | 0.38              | 0.71              | 0.06              | 0.15              | 0.44              | 0.78              | 0.04              | 0.06              | 0.12              | 0.21              | 0.11              | 0.48              | 0.97              | 1.00              |
| 112       | 2400     | 304892      | 0.05              | 0.13              | 0.40              | 0.73              | 0.06              | 0.15              | 0.46              | 0.80              | 0.04              | 0.06              | 0.12              | 0.22              | 0.12              | 0.50              | 0.97              | 1.00              |
| 117       | 307      | 304892      | 0.03              | 0.05              | 0.09              | 0.15              | 0.03              | 0.05              | 0.10              | 0.17              | 0.03              | 0.03              | 0.05              | 0.06              | 0.05              | 0.10              | 0.29              | 0.55              |
| 136       | 237      | 304892      | 0.03              | 0.05              | 0.08              | 0.12              | 0.03              | 0.05              | 0.09              | 0.14              | 0.03              | 0.03              | 0.04              | 0.06              | 0.04              | 0.09              | 0.23              | 0.45              |
| 145       | 627      | 234242      | 0.04              | 0.06              | 0.14              | 0.26              | 0.04              | 0.07              | 0.16              | 0.30              | 0.03              | 0.04              | 0.06              | 0.09              | 0.06              | 0.17              | 0.51              | 0.85              |
| 145.2     | 303      | 234242      | 0.03              | 0.05              | 0.09              | 0.15              | 0.03              | 0.05              | 0.10              | 0.17              | 0.03              | 0.03              | 0.05              | 0.06              | 0.05              | 0.10              | 0.28              | 0.55              |
| 149       | 630      | 234242      | 0.04              | 0.06              | 0.14              | 0.26              | 0.04              | 0.07              | 0.16              | 0.30              | 0.03              | 0.04              | 0.06              | 0.09              | 0.06              | 0.17              | 0.52              | 0.85              |
| 149.1     | 257      | 234242      | 0.03              | 0.05              | 0.08              | 0.13              | 0.03              | 0.05              | 0.09              | 0.15              | 0.03              | 0.03              | 0.04              | 0.06              | 0.04              | 0.09              | 0.25              | 0.48              |
| 149.4     | 252      | 234242      | 0.03              | 0.05              | 0.08              | 0.13              | 0.03              | 0.05              | 0.09              | 0.15              | 0.03              | 0.03              | 0.04              | 0.06              | 0.04              | 0.09              | 0.24              | 0.48              |
| 150       | 817      | 234242      | 0.04              | 0.07              | 0.17              | 0.32              | 0.04              | 0.08              | 0.19              | 0.37              | 0.03              | 0.04              | 0.07              | 0.10              | 0.07              | 0.21              | 0.62              | 0.93              |
| 151       | 603      | 234242      | 0.04              | 0.06              | 0.14              | 0.25              | 0.04              | 0.07              | 0.15              | 0.29              | 0.03              | 0.04              | 0.06              | 0.09              | 0.06              | 0.16              | 0.50              | 0.84              |
| 153       | 4541     | 234242      | 0.07              | 0.21              | 0.65              | 0.94              | 0.07              | 0.25              | 0.72              | 0.97              | 0.04              | 0.08              | 0.19              | 0.37              | 0.19              | 0.76              | 1.00              | 1.00              |
| 153.2     | 3053     | 234242      | 0.06              | 0.16              | 0.49              | 0.82              | 0.06              | 0.18              | 0.56              | 0.88              | 0.04              | 0.07              | 0.14              | 0.27              | 0.14              | 0.59              | 0.99              | 1.00              |
| 153.3     | 2169     | 234242      | 0.05              | 0.13              | 0.37              | 0.68              | 0.05              | 0.14              | 0.43              | 0.76              | 0.04              | 0.06              | 0.11              | 0.20              | 0.11              | 0.46              | 0.96              | 1.00              |
| 155       | 449      | 234242      | 0.04              | 0.06              | 0.11              | 0.20              | 0.04              | 0.06              | 0.13              | 0.23              | 0.03              | 0.04              | 0.05              | 0.07              | 0.05              | 0.13              | 0.39              | 0.72              |
| 157       | 756      | 234242      | 0.04              | 0.07              | 0.16              | 0.30              | 0.04              | 0.08              | 0.18              | 0.35              | 0.03              | 0.04              | 0.07              | 0.10              | 0.06              | 0.19              | 0.59              | 0.91              |
| 158       | 1091     | 234242      | 0.04              | 0.08              | 0.21              | 0.41              | 0.04              | 0.09              | 0.24              | 0.47              | 0.03              | 0.05              | 0.08              | 0.12              | 0.08              | 0.26              | 0.75              | 0.98              |
| 159       | 5580     | 234242      | 0.07              | 0.25              | 0.73              | 0.97              | 0.08              | 0.29              | 0.81              | 0.99              | 0.04              | 0.09              | 0.22              | 0.44              | 0.22              | 0.84              | 1.00              | 1.00              |
| 159.2     | 204      | 234242      | 0.03              | 0.04              | 0.07              | 0.11              | 0.03              | 0.05              | 0.08              | 0.13              | 0.03              | 0.03              | 0.04              | 0.05              | 0.04              | 0.08              | 0.21              | 0.40              |
| 159.3     | 233      | 234242      | 0.03              | 0.05              | 0.08              | 0.12              | 0.03              | 0.05              | 0.08              | 0.14              | 0.03              | 0.03              | 0.04              | 0.06              | 0.04              | 0.09              | 0.23              | 0.45              |
| 159.4     | 205      | 234242      | 0.03              | 0.04              | 0.07              | 0.11              | 0.03              | 0.05              | 0.08              | 0.13              | 0.03              | 0.03              | 0.04              | 0.05              | 0.04              | 0.08              | 0.21              | 0.40              |
| 165       | 3012     | 234242      | 0.06              | 0.16              | 0.48              | 0.82              | 0.06              | 0.18              | 0.55              | 0.88              | 0.04              | 0.06              | 0.14              | 0.26              | 0.14              | 0.59              | 0.99              | 1.00              |
| 165.1     | 2617     | 234242      | 0.05              | 0.14              | 0.43              | 0.76              | 0.06              | 0.16              | 0.50              | 0.83              | 0.04              | 0.06              | 0.13              | 0.24              | 0.13              | 0.53              | 0.98              | 1.00              |
| 170       | 443      | 234242      | 0.03              | 0.06              | 0.11              | 0.20              | 0.04              | 0.06              | 0.12              | 0.23              | 0.03              | 0.04              | 0.05              | 0.07              | 0.05              | 0.13              | 0.39              | 0.71              |
| 170.2     | 320      | 234242      | 0.03              | 0.05              | 0.09              | 0.15              | 0.03              | 0.05              | 0.10              | 0.18              | 0.03              | 0.03              | 0.05              | 0.06              | 0.05              | 0.11              | 0.30              | 0.57              |
| 172       | 14207    | 234242      | 0.13              | 0.53              | 0.98              | 1.00              | 0.14              | 0.60              | 0.99              | 1.00              | 0.06              | 0.15              | 0.47              | 0.81              | 0.46              | 1.00              | 1.00              | 1.00              |
| 172.1     | 2739     | 234242      | 0.06              | 0.15              | 0.45              | 0.78              | 0.06              | 0.17              | 0.51              | 0.85              | 0.04              |                   |                   |                   |                   |                   |                   |                   |

|        |       |        |      |      |      |      |      |      |      |      |      |      |      |      |      |      |      |      |
|--------|-------|--------|------|------|------|------|------|------|------|------|------|------|------|------|------|------|------|------|
| 172.11 | 2739  | 234242 | 0.06 | 0.15 | 0.45 | 0.78 | 0.06 | 0.17 | 0.51 | 0.85 | 0.04 | 0.06 | 0.13 | 0.25 | 0.13 | 0.55 | 0.99 | 1.00 |
| 172.2  | 11594 | 234242 | 0.11 | 0.45 | 0.96 | 1.00 | 0.12 | 0.52 | 0.98 | 1.00 | 0.05 | 0.13 | 0.40 | 0.73 | 0.39 | 0.99 | 1.00 | 1.00 |
| 172.3  | 741   | 234242 | 0.04 | 0.07 | 0.16 | 0.30 | 0.04 | 0.07 | 0.18 | 0.34 | 0.03 | 0.04 | 0.06 | 0.10 | 0.06 | 0.19 | 0.58 | 0.90 |
| 174    | 12023 | 232710 | 0.11 | 0.47 | 0.96 | 1.00 | 0.13 | 0.53 | 0.98 | 1.00 | 0.05 | 0.14 | 0.41 | 0.74 | 0.40 | 0.99 | 1.00 | 1.00 |
| 174.1  | 11848 | 120733 | 0.11 | 0.44 | 0.95 | 1.00 | 0.12 | 0.51 | 0.98 | 1.00 | 0.05 | 0.13 | 0.39 | 0.72 | 0.38 | 0.99 | 1.00 | 1.00 |
| 174.11 | 11108 | 120733 | 0.11 | 0.42 | 0.94 | 1.00 | 0.12 | 0.49 | 0.97 | 1.00 | 0.05 | 0.13 | 0.37 | 0.69 | 0.36 | 0.98 | 1.00 | 1.00 |
| 175    | 3261  | 120184 | 0.06 | 0.17 | 0.51 | 0.84 | 0.06 | 0.19 | 0.58 | 0.90 | 0.04 | 0.07 | 0.15 | 0.28 | 0.14 | 0.61 | 0.99 | 1.00 |
| 180    | 3299  | 122212 | 0.06 | 0.17 | 0.51 | 0.85 | 0.06 | 0.19 | 0.58 | 0.90 | 0.04 | 0.07 | 0.15 | 0.28 | 0.15 | 0.62 | 0.99 | 1.00 |
| 180.1  | 1622  | 122212 | 0.05 | 0.10 | 0.29 | 0.56 | 0.05 | 0.12 | 0.33 | 0.63 | 0.03 | 0.05 | 0.10 | 0.16 | 0.09 | 0.36 | 0.89 | 1.00 |
| 180.3  | 1757  | 122212 | 0.05 | 0.11 | 0.31 | 0.59 | 0.05 | 0.12 | 0.36 | 0.67 | 0.03 | 0.05 | 0.10 | 0.17 | 0.10 | 0.38 | 0.91 | 1.00 |
| 182    | 1240  | 122251 | 0.04 | 0.09 | 0.23 | 0.45 | 0.05 | 0.10 | 0.27 | 0.52 | 0.03 | 0.05 | 0.08 | 0.13 | 0.08 | 0.29 | 0.80 | 0.99 |
| 184    | 2388  | 122251 | 0.05 | 0.13 | 0.40 | 0.72 | 0.06 | 0.15 | 0.46 | 0.79 | 0.04 | 0.06 | 0.12 | 0.22 | 0.12 | 0.49 | 0.97 | 1.00 |
| 184.1  | 2091  | 122251 | 0.05 | 0.12 | 0.36 | 0.66 | 0.05 | 0.14 | 0.41 | 0.74 | 0.03 | 0.06 | 0.11 | 0.20 | 0.11 | 0.44 | 0.95 | 1.00 |
| 184.11 | 2072  | 122251 | 0.05 | 0.12 | 0.35 | 0.66 | 0.05 | 0.14 | 0.41 | 0.74 | 0.03 | 0.06 | 0.11 | 0.20 | 0.11 | 0.44 | 0.95 | 1.00 |
| 184.2  | 281   | 122251 | 0.03 | 0.05 | 0.08 | 0.14 | 0.03 | 0.05 | 0.09 | 0.16 | 0.03 | 0.03 | 0.05 | 0.06 | 0.05 | 0.10 | 0.27 | 0.52 |
| 185    | 7072  | 105218 | 0.08 | 0.30 | 0.81 | 0.99 | 0.09 | 0.34 | 0.88 | 1.00 | 0.05 | 0.10 | 0.26 | 0.51 | 0.25 | 0.90 | 1.00 | 1.00 |
| 187    | 3330  | 111991 | 0.06 | 0.17 | 0.51 | 0.85 | 0.06 | 0.19 | 0.59 | 0.90 | 0.04 | 0.07 | 0.15 | 0.28 | 0.15 | 0.62 | 1.00 | 1.00 |
| 187.1  | 3085  | 111991 | 0.06 | 0.16 | 0.48 | 0.82 | 0.06 | 0.18 | 0.55 | 0.88 | 0.04 | 0.06 | 0.14 | 0.27 | 0.14 | 0.59 | 0.99 | 1.00 |
| 187.2  | 3194  | 111991 | 0.06 | 0.16 | 0.50 | 0.83 | 0.06 | 0.19 | 0.57 | 0.89 | 0.04 | 0.07 | 0.15 | 0.27 | 0.14 | 0.60 | 0.99 | 1.00 |
| 189    | 4104  | 234242 | 0.06 | 0.20 | 0.60 | 0.92 | 0.07 | 0.23 | 0.68 | 0.95 | 0.04 | 0.07 | 0.18 | 0.34 | 0.17 | 0.72 | 1.00 | 1.00 |
| 189.1  | 1098  | 234242 | 0.04 | 0.08 | 0.21 | 0.41 | 0.04 | 0.09 | 0.24 | 0.48 | 0.03 | 0.05 | 0.08 | 0.12 | 0.08 | 0.26 | 0.75 | 0.98 |
| 189.11 | 1055  | 234242 | 0.04 | 0.08 | 0.20 | 0.40 | 0.04 | 0.09 | 0.24 | 0.46 | 0.03 | 0.04 | 0.08 | 0.12 | 0.07 | 0.25 | 0.73 | 0.97 |
| 189.2  | 2339  | 234242 | 0.05 | 0.13 | 0.39 | 0.72 | 0.06 | 0.15 | 0.45 | 0.79 | 0.04 | 0.06 | 0.12 | 0.22 | 0.12 | 0.48 | 0.97 | 1.00 |
| 189.21 | 2083  | 234242 | 0.05 | 0.12 | 0.36 | 0.67 | 0.05 | 0.14 | 0.41 | 0.74 | 0.03 | 0.06 | 0.11 | 0.20 | 0.11 | 0.44 | 0.95 | 1.00 |
| 191    | 702   | 234242 | 0.04 | 0.07 | 0.15 | 0.28 | 0.04 | 0.07 | 0.17 | 0.33 | 0.03 | 0.04 | 0.06 | 0.09 | 0.06 | 0.18 | 0.56 | 0.89 |
| 191.1  | 579   | 234242 | 0.04 | 0.06 | 0.13 | 0.24 | 0.04 | 0.07 | 0.15 | 0.28 | 0.03 | 0.04 | 0.06 | 0.08 | 0.06 | 0.16 | 0.48 | 0.82 |
| 191.11 | 539   | 234242 | 0.04 | 0.06 | 0.13 | 0.23 | 0.04 | 0.06 | 0.14 | 0.26 | 0.03 | 0.04 | 0.06 | 0.08 | 0.06 | 0.15 | 0.46 | 0.79 |
| 193    | 345   | 234242 | 0.03 | 0.05 | 0.10 | 0.16 | 0.03 | 0.05 | 0.11 | 0.19 | 0.03 | 0.04 | 0.05 | 0.07 | 0.05 | 0.11 | 0.32 | 0.60 |
| 195    | 17637 | 234242 | 0.14 | 0.61 | 0.99 | 1.00 | 0.16 | 0.69 | 1.00 | 1.00 | 0.06 | 0.18 | 0.55 | 0.88 | 0.53 | 1.00 | 1.00 | 1.00 |
| 195.1  | 16966 | 234242 | 0.14 | 0.60 | 0.99 | 1.00 | 0.16 | 0.67 | 1.00 | 1.00 | 0.06 | 0.17 | 0.53 | 0.87 | 0.52 | 1.00 | 1.00 | 1.00 |
| 196    | 12225 | 234242 | 0.11 | 0.47 | 0.97 | 1.00 | 0.13 | 0.54 | 0.98 | 1.00 | 0.05 | 0.14 | 0.42 | 0.75 | 0.41 | 0.99 | 1.00 | 1.00 |
| 197    | 30162 | 234242 | 0.21 | 0.82 | 1.00 | 1.00 | 0.24 | 0.88 | 1.00 | 1.00 | 0.08 | 0.26 | 0.76 | 0.98 | 0.74 | 1.00 | 1.00 | 1.00 |
| 198    | 10103 | 234242 | 0.10 | 0.41 | 0.93 | 1.00 | 0.11 | 0.47 | 0.96 | 1.00 | 0.05 | 0.12 | 0.36 | 0.67 | 0.35 | 0.98 | 1.00 | 1.00 |
| 198.1  | 5504  | 234242 | 0.07 | 0.25 | 0.73 | 0.97 | 0.08 | 0.29 | 0.80 | 0.99 | 0.04 | 0.09 | 0.22 | 0.43 | 0.22 | 0.83 | 1.00 | 1.00 |
| 198.2  | 2544  | 234242 | 0.05 | 0.14 | 0.42 | 0.75 | 0.06 | 0.16 | 0.48 | 0.82 | 0.04 | 0.06 | 0.13 | 0.23 | 0.12 | 0.52 | 0.98 | 1.00 |
| 198.3  | 1757  | 234242 | 0.05 | 0.11 | 0.31 | 0.59 | 0.05 | 0.12 | 0.36 | 0.67 | 0.03 | 0.05 | 0.10 | 0.17 | 0.10 | 0.38 | 0.92 | 1.00 |
| 198.4  | 2970  | 234242 | 0.06 | 0.16 | 0.48 | 0.81 | 0.06 | 0.18 | 0.55 | 0.88 | 0.04 | 0.06 | 0.14 | 0.26 | 0.14 | 0.58 | 0.99 | 1.00 |
| 198.5  | 927   | 234242 | 0.04 | 0.08 | 0.19 | 0.36 | 0.04 | 0.08 | 0.21 | 0.41 | 0.03 | 0.04 | 0.07 | 0.11 | 0.07 | 0.23 | 0.68 | 0.95 |
| 198.6  | 2454  | 234242 | 0.05 | 0.14 | 0.41 | 0.74 | 0.06 | 0.15 | 0.47 | 0.81 | 0.04 | 0.06 | 0.12 | 0.22 | 0.12 | 0.50 | 0.98 | 1.00 |
| 198.7  | 201   | 234242 | 0.03 | 0.04 | 0.07 | 0.11 | 0.03 | 0.05 | 0.08 | 0.13 | 0.03 | 0.03 | 0.04 | 0.05 | 0.04 | 0.08 | 0.20 | 0.40 |
| 199    | 1504  | 234242 | 0.05 | 0.10 | 0.27 | 0.53 | 0.05 | 0.11 | 0.32 | 0.60 | 0.03 | 0.05 | 0.09 | 0.15 | 0.09 | 0.34 | 0.87 | 1.00 |
| 200    | 1054  | 234242 | 0.04 | 0.08 | 0.20 | 0.40 | 0.04 | 0.09 | 0.24 | 0.46 | 0.03 | 0.04 | 0.08 | 0.12 | 0.07 | 0.25 | 0.73 | 0.97 |
| 200.1  | 408   | 232957 | 0.03 | 0.05 | 0.11 | 0.18 | 0.04 | 0.06 | 0.12 | 0.21 | 0.03 | 0.04 | 0.05 | 0.07 | 0.05 | 0.12 | 0.36 | 0.68 |
| 201    | 252   | 234242 | 0.03 | 0.05 | 0.08 | 0.13 | 0.03 | 0.05 | 0.09 | 0.15 | 0.03 | 0.05 | 0.03 | 0.04 | 0.04 | 0.09 | 0.24 | 0.48 |
| 202    | 2358  | 234242 | 0.05 | 0.13 | 0.39 | 0.72 | 0.06 | 0.15 | 0.46 | 0.79 | 0.04 | 0.06 | 0.12 | 0.22 | 0.12 | 0.49 | 0.97 | 1.00 |
| 202.2  | 1853  | 234242 | 0.05 | 0.11 | 0.32 | 0.62 | 0.05 | 0.13 | 0.38 | 0.69 | 0.03 | 0.05 | 0.10 | 0.18 | 0.10 | 0.40 | 0.93 | 1.00 |
| 202.21 | 358   | 234242 | 0.03 | 0.05 | 0.10 | 0.17 | 0.03 | 0.06 | 0.11 | 0.19 | 0.03 | 0.04 | 0.05 | 0.07 | 0.05 | 0.11 | 0.33 | 0.62 |
| 202.24 | 623   | 234242 | 0.04 | 0.06 | 0.14 | 0.26 | 0.04 | 0.07 | 0.16 | 0.30 | 0.03 | 0.04 | 0.06 | 0.09 | 0.06 | 0.17 | 0.51 | 0.85 |
| 204    | 1774  | 234242 | 0.05 | 0.11 | 0.31 | 0.60 | 0.05 | 0.12 | 0.36 | 0.67 | 0.03 | 0.05 | 0.10 | 0.17 | 0.10 | 0.39 | 0.92 | 1.00 |
| 204.1  | 612   | 234242 | 0.04 | 0.06 | 0.14 | 0.25 | 0.04 | 0.07 | 0.16 | 0.29 | 0.03 | 0.04 | 0.06 | 0.09 | 0.06 | 0.17 | 0.50 | 0.84 |
| 204.12 | 540   | 234242 | 0.04 | 0.06 | 0.13 | 0.23 | 0.04 | 0.06 | 0.14 | 0.27 | 0.03 | 0.04 | 0.06 | 0.08 | 0.06 | 0.15 | 0.46 | 0.79 |
| 204.2  | 507   | 234242 | 0.04 | 0.06 | 0.12 | 0.22 | 0.04 | 0.06 | 0.14 | 0.25 | 0.03 | 0.04 | 0.06 | 0.08 | 0.05 | 0.14 | 0.43 | 0.77 |
| 204.21 | 353   | 234242 | 0.03 | 0.05 | 0.10 | 0.17 | 0.03 | 0.05 | 0.11 | 0.19 | 0.03 | 0.04 | 0.05 | 0.07 | 0.05 | 0.11 | 0.32 | 0.61 |
| 204.4  | 593   | 234242 | 0.04 | 0.06 | 0.13 | 0.25 | 0.04 | 0.07 | 0.15 | 0.29 | 0.03 | 0.04 | 0.06 | 0.09 | 0.06 | 0.16 | 0.49 | 0.83 |
| 208    | 20688 | 234242 | 0.16 | 0.68 | 1.00 | 1.00 | 0.18 | 0.75 | 1.00 | 1.00 | 0.07 | 0.20 | 0.61 | 0.92 | 0.60 | 1.00 | 1.00 | 1.00 |
| 210    | 911   | 234242 | 0.04 | 0.08 | 0.18 | 0.35 | 0.04 | 0.08 | 0.21 | 0.41 | 0.03 | 0.04 | 0.07 | 0.11 | 0.07 | 0.22 | 0.67 | 0.95 |
| 211    | 5805  | 234242 | 0.08 | 0.26 | 0.75 | 0.98 | 0.08 | 0.30 | 0.82 | 0.99 | 0.04 | 0.09 | 0.23 | 0.45 | 0.22 | 0.85 | 1.00 | 1.00 |
| 212    | 341   | 234242 | 0.03 | 0.05 | 0.09 | 0.16 | 0.03 | 0.05 | 0.11 | 0.18 | 0.03 | 0.04 | 0.05 | 0.07 | 0.05 | 0.11 | 0.31 | 0.60 |
| 213    | 284   | 234242 | 0.03 | 0.05 | 0.09 | 0.14 | 0.03 | 0.05 | 0.09 | 0.16 | 0.03 | 0.03 | 0.05 | 0.06 | 0.05 | 0.10 | 0.27 | 0.52 |
| 214    | 5942  | 234242 | 0.08 | 0.27 | 0.76 | 0.98 | 0.08 | 0.31 | 0.83 | 0.99 | 0.04 | 0.09 | 0.24 | 0.46 | 0.23 | 0.86 | 1.00 | 1.00 |
| 214.1  | 4303  | 234242 | 0.07 | 0.21 | 0.62 | 0.93 | 0.07 | 0.24 | 0.70 | 0.96 | 0.04 | 0.08 | 0.18 | 0.35 | 0.18 | 0.74 | 1.00 | 1.00 |
| 215    | 1015  | 234242 | 0.04 | 0.08 | 0.20 | 0.39 | 0.04 | 0.09 | 0.23 | 0.45 | 0.03 | 0.04 | 0.07 | 0.12 | 0.07 | 0.24 | 0.72 | 0.97 |
| 216    | 8174  | 234242 | 0.09 | 0.34 | 0.88 | 1.00 | 0.10 | 0.40 | 0.93 | 1.00 | 0.05 | 0.11 | 0.30 | 0.58 | 0.29 | 0.94 | 1.00 | 1.00 |
| 217    | 592   | 234242 | 0.04 | 0.06 | 0.13 | 0.25 | 0.04 | 0.07 | 0.15 | 0.29 | 0.03 | 0.04 | 0.06 | 0.09 | 0.06 | 0.16 | 0.49 | 0.83 |
| 217.1  | 548   | 234242 | 0.04 | 0.06 | 0.13 | 0.23 | 0.04 | 0.07 | 0.14 | 0.27 | 0.03 | 0.04 | 0.06 | 0.08 | 0.06 | 0.15 | 0.46 | 0.80 |
| 218    | 9233  | 122251 | 0.10 | 0.37 | 0.90 | 1.00 | 0.11 | 0.43 | 0.94 | 1.00 | 0.05 | 0.11 | 0.33 | 0.62 | 0.32 | 0.96 | 1.00 | 1.00 |
| 218.1  | 9007  | 122251 | 0.09 | 0.36 | 0.89 | 1.00 | 0.10 | 0.42 | 0.94 | 1.00 | 0.05 | 0.11 | 0.32 | 0.61 | 0.31 | 0.96 | 1.00 | 1.00 |
| 218.2  | 304   | 122251 | 0.03 | 0.05 | 0.09 | 0.15 | 0.03 | 0.05 | 0.10 | 0.17 | 0.03 | 0.03 | 0.05 | 0.06 | 0.05 | 0.10 | 0.28 | 0.55 |
| 220    | 1320  | 122251 | 0.04 | 0.09 | 0.24 | 0.48 | 0.05 | 0.10 | 0.28 | 0.55 | 0.03 | 0.05 | 0.09 | 0.14 | 0.08 | 0.30 | 0.82 | 0.99 |
| 225    | 818   | 234242 | 0.04 | 0.07 | 0.17 |      |      |      |      |      |      |      |      |      |      |      |      |      |

|        |       |        |      |      |      |      |      |      |      |      |      |      |      |      |      |      |      |      |      |
|--------|-------|--------|------|------|------|------|------|------|------|------|------|------|------|------|------|------|------|------|------|
| 227.3  | 319   | 234242 | 0.03 | 0.05 | 0.09 | 0.15 | 0.03 | 0.05 | 0.10 | 0.17 | 0.03 | 0.03 | 0.05 | 0.06 | 0.05 | 0.11 | 0.30 | 0.57 |      |
| 228    | 1487  | 234242 | 0.05 | 0.10 | 0.27 | 0.52 | 0.05 | 0.11 | 0.31 | 0.60 | 0.03 | 0.05 | 0.09 | 0.15 | 0.09 | 0.34 | 0.87 | 1.00 |      |
| 229    | 2113  | 234242 | 0.05 | 0.12 | 0.36 | 0.67 | 0.05 | 0.14 | 0.42 | 0.75 | 0.04 | 0.06 | 0.11 | 0.20 | 0.11 | 0.45 | 0.95 | 1.00 |      |
| 240    | 542   | 261466 | 0.04 | 0.06 | 0.13 | 0.23 | 0.04 | 0.06 | 0.14 | 0.27 | 0.03 | 0.04 | 0.06 | 0.08 | 0.06 | 0.15 | 0.46 | 0.80 |      |
| 241    | 1539  | 261466 | 0.05 | 0.10 | 0.28 | 0.54 | 0.05 | 0.11 | 0.32 | 0.61 | 0.03 | 0.05 | 0.09 | 0.16 | 0.09 | 0.35 | 0.88 | 1.00 |      |
| 241.1  | 478   | 261466 | 0.04 | 0.06 | 0.12 | 0.21 | 0.04 | 0.06 | 0.13 | 0.24 | 0.03 | 0.04 | 0.05 | 0.08 | 0.05 | 0.14 | 0.41 | 0.74 |      |
| 241.2  | 631   | 261466 | 0.04 | 0.06 | 0.14 | 0.26 | 0.04 | 0.07 | 0.16 | 0.30 | 0.03 | 0.04 | 0.06 | 0.09 | 0.06 | 0.17 | 0.52 | 0.85 |      |
| 242    | 1795  | 261466 | 0.05 | 0.11 | 0.32 | 0.60 | 0.05 | 0.12 | 0.37 | 0.68 | 0.03 | 0.05 | 0.10 | 0.18 | 0.10 | 0.39 | 0.92 | 1.00 |      |
| 242.1  | 439   | 261466 | 0.03 | 0.06 | 0.11 | 0.20 | 0.04 | 0.06 | 0.12 | 0.22 | 0.03 | 0.04 | 0.05 | 0.07 | 0.05 | 0.13 | 0.39 | 0.71 |      |
| 242.3  | 210   | 261466 | 0.03 | 0.04 | 0.07 | 0.12 | 0.03 | 0.04 | 0.05 | 0.08 | 0.03 | 0.05 | 0.03 | 0.04 | 0.05 | 0.04 | 0.08 | 0.21 | 0.41 |
| 244    | 14603 | 261466 | 0.13 | 0.54 | 0.98 | 1.00 | 0.14 | 0.61 | 0.99 | 1.00 | 0.06 | 0.16 | 0.48 | 0.82 | 0.47 | 1.00 | 1.00 | 1.00 |      |
| 244.1  | 1144  | 261466 | 0.04 | 0.09 | 0.22 | 0.43 | 0.04 | 0.09 | 0.25 | 0.49 | 0.03 | 0.05 | 0.08 | 0.13 | 0.08 | 0.27 | 0.77 | 0.98 |      |
| 244.4  | 13923 | 261466 | 0.12 | 0.52 | 0.98 | 1.00 | 0.14 | 0.60 | 0.99 | 1.00 | 0.06 | 0.15 | 0.46 | 0.80 | 0.45 | 1.00 | 1.00 | 1.00 |      |
| 245    | 282   | 261466 | 0.03 | 0.05 | 0.09 | 0.14 | 0.03 | 0.05 | 0.09 | 0.14 | 0.03 | 0.05 | 0.03 | 0.05 | 0.05 | 0.10 | 0.27 | 0.52 |      |
| 245.2  | 215   | 261466 | 0.03 | 0.04 | 0.07 | 0.12 | 0.03 | 0.05 | 0.08 | 0.13 | 0.03 | 0.03 | 0.04 | 0.05 | 0.04 | 0.08 | 0.21 | 0.42 |      |
| 245.21 | 202   | 261466 | 0.03 | 0.04 | 0.07 | 0.11 | 0.03 | 0.05 | 0.08 | 0.13 | 0.03 | 0.03 | 0.04 | 0.05 | 0.04 | 0.08 | 0.20 | 0.40 |      |
| 246    | 386   | 261466 | 0.03 | 0.05 | 0.10 | 0.18 | 0.04 | 0.06 | 0.11 | 0.20 | 0.03 | 0.04 | 0.05 | 0.07 | 0.05 | 0.12 | 0.35 | 0.65 |      |
| 250    | 19441 | 261466 | 0.15 | 0.65 | 1.00 | 1.00 | 0.18 | 0.73 | 1.00 | 1.00 | 0.06 | 0.19 | 0.59 | 0.91 | 0.57 | 1.00 | 1.00 | 1.00 |      |
| 250.1  | 2582  | 261466 | 0.05 | 0.14 | 0.43 | 0.76 | 0.06 | 0.16 | 0.49 | 0.83 | 0.04 | 0.06 | 0.13 | 0.23 | 0.12 | 0.52 | 0.98 | 1.00 |      |
| 250.11 | 212   | 261466 | 0.03 | 0.04 | 0.07 | 0.12 | 0.03 | 0.05 | 0.08 | 0.13 | 0.03 | 0.03 | 0.04 | 0.05 | 0.04 | 0.08 | 0.21 | 0.41 |      |
| 250.13 | 451   | 261466 | 0.04 | 0.06 | 0.11 | 0.20 | 0.04 | 0.06 | 0.13 | 0.23 | 0.03 | 0.04 | 0.05 | 0.07 | 0.05 | 0.13 | 0.40 | 0.72 |      |
| 250.2  | 18758 | 261466 | 0.15 | 0.64 | 1.00 | 1.00 | 0.17 | 0.72 | 1.00 | 1.00 | 0.06 | 0.19 | 0.58 | 0.90 | 0.56 | 1.00 | 1.00 | 1.00 |      |
| 250.22 | 213   | 261466 | 0.03 | 0.04 | 0.07 | 0.12 | 0.03 | 0.05 | 0.08 | 0.13 | 0.03 | 0.03 | 0.04 | 0.05 | 0.04 | 0.08 | 0.21 | 0.42 |      |
| 250.23 | 1355  | 261466 | 0.04 | 0.09 | 0.25 | 0.49 | 0.05 | 0.10 | 0.29 | 0.56 | 0.03 | 0.05 | 0.09 | 0.14 | 0.08 | 0.31 | 0.83 | 0.99 |      |
| 250.24 | 598   | 261466 | 0.04 | 0.06 | 0.13 | 0.25 | 0.04 | 0.07 | 0.15 | 0.29 | 0.03 | 0.04 | 0.06 | 0.09 | 0.06 | 0.16 | 0.50 | 0.83 |      |
| 250.4  | 678   | 261466 | 0.04 | 0.07 | 0.15 | 0.28 | 0.04 | 0.07 | 0.17 | 0.32 | 0.03 | 0.04 | 0.06 | 0.09 | 0.06 | 0.18 | 0.55 | 0.88 |      |
| 250.41 | 288   | 261466 | 0.03 | 0.05 | 0.09 | 0.14 | 0.03 | 0.05 | 0.10 | 0.16 | 0.03 | 0.03 | 0.05 | 0.06 | 0.05 | 0.10 | 0.27 | 0.53 |      |
| 250.42 | 391   | 261466 | 0.03 | 0.05 | 0.10 | 0.18 | 0.04 | 0.06 | 0.11 | 0.20 | 0.03 | 0.04 | 0.05 | 0.07 | 0.05 | 0.12 | 0.35 | 0.66 |      |
| 250.6  | 408   | 261466 | 0.03 | 0.05 | 0.11 | 0.18 | 0.04 | 0.06 | 0.12 | 0.21 | 0.03 | 0.04 | 0.05 | 0.07 | 0.05 | 0.12 | 0.36 | 0.68 |      |
| 250.7  | 1398  | 254478 | 0.04 | 0.10 | 0.26 | 0.50 | 0.05 | 0.11 | 0.30 | 0.57 | 0.03 | 0.05 | 0.09 | 0.15 | 0.09 | 0.32 | 0.85 | 0.99 |      |
| 251.1  | 1024  | 261466 | 0.04 | 0.08 | 0.20 | 0.39 | 0.04 | 0.08 | 0.23 | 0.39 | 0.03 | 0.04 | 0.07 | 0.12 | 0.07 | 0.25 | 0.72 | 0.97 |      |
| 252    | 940   | 261466 | 0.04 | 0.08 | 0.19 | 0.36 | 0.04 | 0.08 | 0.22 | 0.42 | 0.03 | 0.04 | 0.07 | 0.11 | 0.07 | 0.23 | 0.69 | 0.96 |      |
| 252.1  | 830   | 261466 | 0.04 | 0.07 | 0.17 | 0.33 | 0.04 | 0.08 | 0.20 | 0.38 | 0.03 | 0.04 | 0.07 | 0.10 | 0.07 | 0.21 | 0.63 | 0.93 |      |
| 253    | 697   | 261466 | 0.04 | 0.07 | 0.15 | 0.28 | 0.04 | 0.07 | 0.17 | 0.33 | 0.03 | 0.04 | 0.06 | 0.09 | 0.06 | 0.18 | 0.56 | 0.88 |      |
| 253.2  | 261   | 261466 | 0.03 | 0.05 | 0.08 | 0.13 | 0.03 | 0.05 | 0.09 | 0.13 | 0.03 | 0.03 | 0.04 | 0.06 | 0.04 | 0.09 | 0.25 | 0.49 |      |
| 255    | 636   | 261466 | 0.04 | 0.06 | 0.14 | 0.26 | 0.04 | 0.07 | 0.16 | 0.30 | 0.03 | 0.04 | 0.06 | 0.09 | 0.06 | 0.17 | 0.52 | 0.85 |      |
| 255.2  | 363   | 261466 | 0.03 | 0.05 | 0.10 | 0.17 | 0.03 | 0.06 | 0.11 | 0.19 | 0.03 | 0.04 | 0.05 | 0.07 | 0.05 | 0.12 | 0.33 | 0.63 |      |
| 255.21 | 363   | 261466 | 0.03 | 0.05 | 0.10 | 0.17 | 0.03 | 0.06 | 0.11 | 0.19 | 0.03 | 0.04 | 0.05 | 0.07 | 0.05 | 0.12 | 0.33 | 0.63 |      |
| 256    | 241   | 143689 | 0.03 | 0.05 | 0.08 | 0.13 | 0.03 | 0.05 | 0.09 | 0.14 | 0.03 | 0.03 | 0.04 | 0.06 | 0.04 | 0.09 | 0.24 | 0.46 |      |
| 256.4  | 200   | 143689 | 0.03 | 0.04 | 0.07 | 0.11 | 0.03 | 0.05 | 0.08 | 0.13 | 0.03 | 0.03 | 0.04 | 0.05 | 0.04 | 0.08 | 0.20 | 0.39 |      |
| 260    | 275   | 261466 | 0.03 | 0.05 | 0.08 | 0.14 | 0.03 | 0.05 | 0.09 | 0.16 | 0.03 | 0.03 | 0.05 | 0.06 | 0.05 | 0.10 | 0.26 | 0.51 |      |
| 260.6  | 885   | 261466 | 0.04 | 0.07 | 0.18 | 0.35 | 0.04 | 0.08 | 0.21 | 0.40 | 0.03 | 0.04 | 0.07 | 0.11 | 0.07 | 0.22 | 0.66 | 0.94 |      |
| 261    | 1684  | 261466 | 0.05 | 0.11 | 0.30 | 0.58 | 0.05 | 0.12 | 0.35 | 0.65 | 0.03 | 0.05 | 0.10 | 0.17 | 0.10 | 0.37 | 0.90 | 1.00 |      |
| 261.2  | 911   | 261466 | 0.04 | 0.08 | 0.18 | 0.35 | 0.04 | 0.08 | 0.21 | 0.35 | 0.03 | 0.08 | 0.04 | 0.07 | 0.11 | 0.07 | 0.22 | 0.67 | 0.95 |
| 261.4  | 788   | 261466 | 0.04 | 0.07 | 0.16 | 0.31 | 0.04 | 0.08 | 0.19 | 0.36 | 0.03 | 0.04 | 0.07 | 0.10 | 0.07 | 0.20 | 0.61 | 0.92 |      |
| 262    | 298   | 261466 | 0.03 | 0.05 | 0.09 | 0.15 | 0.03 | 0.05 | 0.10 | 0.17 | 0.03 | 0.03 | 0.05 | 0.06 | 0.05 | 0.10 | 0.28 | 0.54 |      |
| 269    | 324   | 261466 | 0.03 | 0.05 | 0.09 | 0.16 | 0.03 | 0.05 | 0.10 | 0.18 | 0.03 | 0.03 | 0.05 | 0.06 | 0.05 | 0.11 | 0.30 | 0.58 |      |
| 270    | 365   | 261466 | 0.03 | 0.05 | 0.10 | 0.17 | 0.03 | 0.06 | 0.11 | 0.19 | 0.03 | 0.04 | 0.05 | 0.07 | 0.05 | 0.12 | 0.33 | 0.63 |      |
| 270.3  | 321   | 261466 | 0.03 | 0.05 | 0.09 | 0.15 | 0.03 | 0.05 | 0.10 | 0.18 | 0.03 | 0.03 | 0.05 | 0.06 | 0.05 | 0.11 | 0.30 | 0.57 |      |
| 270.32 | 246   | 261466 | 0.03 | 0.05 | 0.08 | 0.13 | 0.03 | 0.05 | 0.09 | 0.14 | 0.03 | 0.03 | 0.04 | 0.06 | 0.04 | 0.09 | 0.24 | 0.47 |      |
| 272    | 35143 | 261466 | 0.23 | 0.87 | 1.00 | 1.00 | 0.27 | 0.92 | 1.00 | 1.00 | 0.08 | 0.30 | 0.82 | 0.99 | 0.80 | 1.00 | 1.00 | 1.00 |      |
| 272.1  | 35033 | 261466 | 0.23 | 0.87 | 1.00 | 1.00 | 0.27 | 0.92 | 1.00 | 1.00 | 0.08 | 0.30 | 0.82 | 0.99 | 0.80 | 1.00 | 1.00 | 1.00 |      |
| 272.11 | 32554 | 261466 | 0.22 | 0.85 | 1.00 | 1.00 | 0.26 | 0.90 | 1.00 | 1.00 | 0.08 | 0.28 | 0.79 | 0.99 | 0.78 | 1.00 | 1.00 | 1.00 |      |
| 272.9  | 251   | 261466 | 0.03 | 0.05 | 0.08 | 0.13 | 0.03 | 0.05 | 0.09 | 0.15 | 0.03 | 0.03 | 0.04 | 0.06 | 0.04 | 0.09 | 0.24 | 0.47 |      |
| 274    | 4155  | 261466 | 0.07 | 0.20 | 0.61 | 0.92 | 0.07 | 0.23 | 0.69 | 0.96 | 0.04 | 0.07 | 0.18 | 0.34 | 0.17 | 0.72 | 1.00 | 1.00 |      |
| 274.1  | 3587  | 261466 | 0.06 | 0.18 | 0.55 | 0.88 | 0.07 | 0.21 | 0.62 | 0.93 | 0.04 | 0.07 | 0.16 | 0.31 | 0.16 | 0.66 | 1.00 | 1.00 |      |
| 274.2  | 628   | 261466 | 0.04 | 0.06 | 0.14 | 0.26 | 0.04 | 0.07 | 0.16 | 0.30 | 0.03 | 0.04 | 0.06 | 0.09 | 0.06 | 0.17 | 0.52 | 0.85 |      |
| 274.21 | 557   | 261466 | 0.04 | 0.06 | 0.13 | 0.24 | 0.04 | 0.07 | 0.15 | 0.27 | 0.03 | 0.04 | 0.06 | 0.08 | 0.06 | 0.15 | 0.47 | 0.81 |      |
| 275    | 2470  | 261466 | 0.05 | 0.14 | 0.41 | 0.74 | 0.06 | 0.16 | 0.47 | 0.81 | 0.04 | 0.06 | 0.12 | 0.23 | 0.12 | 0.51 | 0.98 | 1.00 |      |
| 275.1  | 661   | 309446 | 0.04 | 0.07 | 0.14 | 0.27 | 0.04 | 0.07 | 0.16 | 0.31 | 0.03 | 0.04 | 0.06 | 0.09 | 0.06 | 0.17 | 0.54 | 0.87 |      |
| 275.3  | 543   | 261466 | 0.04 | 0.06 | 0.13 | 0.23 | 0.04 | 0.06 | 0.14 | 0.27 | 0.03 | 0.04 | 0.06 | 0.08 | 0.06 | 0.15 | 0.46 | 0.80 |      |
| 275.5  | 1454  | 261466 | 0.05 | 0.10 | 0.27 | 0.52 | 0.05 | 0.11 | 0.31 | 0.59 | 0.03 | 0.05 | 0.09 | 0.15 | 0.09 | 0.33 | 0.86 | 1.00 |      |
| 275.53 | 273   | 261466 | 0.03 | 0.05 | 0.08 | 0.14 | 0.03 | 0.05 | 0.09 | 0.16 | 0.03 | 0.03 | 0.05 | 0.06 | 0.04 | 0.10 | 0.26 | 0.51 |      |
| 276    | 7916  | 261466 | 0.09 | 0.34 | 0.87 | 1.00 | 0.10 | 0.39 | 0.92 | 1.00 | 0.05 | 0.11 | 0.30 | 0.57 | 0.29 | 0.94 | 1.00 | 1.00 |      |
| 276.1  | 5081  | 261466 | 0.07 | 0.23 | 0.70 | 0.96 | 0.08 | 0.27 | 0.77 | 0.98 | 0.04 | 0.08 | 0.21 | 0.41 | 0.20 | 0.80 | 1.00 | 1.00 |      |
| 276.11 | 323   | 261466 | 0.03 | 0.05 | 0.09 | 0.15 | 0.03 | 0.05 | 0.10 | 0.18 | 0.03 | 0.03 | 0.05 | 0.06 | 0.05 | 0.11 | 0.30 | 0.58 |      |
| 276.12 | 2295  | 261466 | 0.05 | 0.13 | 0.39 | 0.71 | 0.06 | 0.15 | 0.45 | 0.78 | 0.04 | 0.06 | 0.12 | 0.21 | 0.12 | 0.48 | 0.97 | 1.00 |      |
| 276.13 | 1176  | 261466 | 0.04 | 0.09 | 0.22 | 0.44 | 0.04 | 0.10 | 0.26 | 0.50 | 0.03 | 0.05 | 0.08 | 0.13 | 0.08 | 0.28 | 0.78 | 0.98 |      |
| 276.14 | 1781  | 261466 | 0.05 | 0.11 | 0.31 | 0.60 | 0.05 | 0.12 | 0.36 | 0.68 | 0.03 | 0.05 | 0.10 | 0.18 | 0.10 | 0.39 | 0.92 | 1.00 |      |
| 276.4  | 1421  | 261466 | 0.04 |      |      |      |      |      |      |      |      |      |      |      |      |      |      |      |      |



|        |       |        |      |      |      |      |      |      |      |      |      |      |      |      |      |      |      |      |
|--------|-------|--------|------|------|------|------|------|------|------|------|------|------|------|------|------|------|------|------|
| 277.4  | 383   | 261466 | 0.03 | 0.05 | 0.10 | 0.18 | 0.04 | 0.06 | 0.11 | 0.20 | 0.03 | 0.04 | 0.05 | 0.07 | 0.05 | 0.12 | 0.35 | 0.65 |
| 277.5  | 256   | 261466 | 0.03 | 0.05 | 0.08 | 0.13 | 0.03 | 0.05 | 0.09 | 0.15 | 0.03 | 0.03 | 0.04 | 0.06 | 0.04 | 0.09 | 0.25 | 0.48 |
| 278    | 12786 | 261466 | 0.12 | 0.49 | 0.97 | 1.00 | 0.13 | 0.56 | 0.99 | 1.00 | 0.05 | 0.14 | 0.44 | 0.77 | 0.42 | 0.99 | 1.00 | 1.00 |
| 278.1  | 12646 | 261466 | 0.12 | 0.49 | 0.97 | 1.00 | 0.13 | 0.56 | 0.99 | 1.00 | 0.05 | 0.14 | 0.43 | 0.76 | 0.42 | 0.99 | 1.00 | 1.00 |
| 279    | 271   | 261466 | 0.03 | 0.05 | 0.08 | 0.14 | 0.03 | 0.05 | 0.08 | 0.14 | 0.03 | 0.03 | 0.05 | 0.06 | 0.04 | 0.10 | 0.26 | 0.50 |
| 279.1  | 223   | 261466 | 0.03 | 0.04 | 0.08 | 0.12 | 0.03 | 0.05 | 0.08 | 0.14 | 0.03 | 0.03 | 0.04 | 0.06 | 0.04 | 0.09 | 0.22 | 0.43 |
| 279.7  | 239   | 261466 | 0.03 | 0.05 | 0.08 | 0.13 | 0.03 | 0.05 | 0.09 | 0.14 | 0.03 | 0.03 | 0.04 | 0.06 | 0.04 | 0.09 | 0.23 | 0.46 |
| 280    | 8403  | 310388 | 0.09 | 0.35 | 0.89 | 1.00 | 0.10 | 0.41 | 0.93 | 1.00 | 0.05 | 0.11 | 0.31 | 0.60 | 0.30 | 0.95 | 1.00 | 1.00 |
| 280.1  | 8022  | 310388 | 0.09 | 0.34 | 0.87 | 1.00 | 0.10 | 0.39 | 0.92 | 1.00 | 0.05 | 0.11 | 0.30 | 0.58 | 0.29 | 0.94 | 1.00 | 1.00 |
| 280.2  | 436   | 310388 | 0.03 | 0.06 | 0.11 | 0.19 | 0.04 | 0.06 | 0.12 | 0.22 | 0.03 | 0.04 | 0.05 | 0.07 | 0.05 | 0.13 | 0.38 | 0.70 |
| 281    | 1150  | 310388 | 0.04 | 0.09 | 0.22 | 0.43 | 0.04 | 0.09 | 0.25 | 0.49 | 0.03 | 0.05 | 0.08 | 0.13 | 0.08 | 0.27 | 0.77 | 0.98 |
| 281.1  | 1093  | 310388 | 0.04 | 0.08 | 0.21 | 0.41 | 0.04 | 0.09 | 0.24 | 0.47 | 0.03 | 0.05 | 0.08 | 0.12 | 0.08 | 0.26 | 0.75 | 0.98 |
| 281.11 | 769   | 310388 | 0.04 | 0.07 | 0.16 | 0.31 | 0.04 | 0.08 | 0.18 | 0.36 | 0.03 | 0.04 | 0.07 | 0.10 | 0.06 | 0.20 | 0.60 | 0.91 |
| 281.13 | 200   | 310388 | 0.03 | 0.04 | 0.07 | 0.11 | 0.03 | 0.05 | 0.08 | 0.11 | 0.03 | 0.03 | 0.04 | 0.05 | 0.04 | 0.08 | 0.20 | 0.39 |
| 284    | 480   | 310388 | 0.04 | 0.06 | 0.12 | 0.21 | 0.04 | 0.06 | 0.13 | 0.24 | 0.03 | 0.04 | 0.05 | 0.08 | 0.05 | 0.14 | 0.42 | 0.75 |
| 285    | 12234 | 310388 | 0.12 | 0.48 | 0.97 | 1.00 | 0.13 | 0.55 | 0.99 | 1.00 | 0.05 | 0.14 | 0.42 | 0.75 | 0.41 | 0.99 | 1.00 | 1.00 |
| 285.1  | 237   | 310388 | 0.03 | 0.05 | 0.08 | 0.12 | 0.03 | 0.05 | 0.09 | 0.14 | 0.03 | 0.03 | 0.04 | 0.06 | 0.04 | 0.09 | 0.23 | 0.45 |
| 285.2  | 736   | 310388 | 0.04 | 0.07 | 0.16 | 0.30 | 0.04 | 0.07 | 0.18 | 0.34 | 0.03 | 0.04 | 0.06 | 0.10 | 0.06 | 0.19 | 0.58 | 0.90 |
| 285.22 | 433   | 310388 | 0.03 | 0.06 | 0.11 | 0.19 | 0.04 | 0.06 | 0.12 | 0.22 | 0.03 | 0.04 | 0.05 | 0.07 | 0.05 | 0.13 | 0.38 | 0.70 |
| 286    | 1023  | 310388 | 0.04 | 0.08 | 0.20 | 0.39 | 0.04 | 0.09 | 0.23 | 0.45 | 0.03 | 0.04 | 0.07 | 0.12 | 0.07 | 0.25 | 0.72 | 0.97 |
| 286.1  | 442   | 310388 | 0.03 | 0.06 | 0.11 | 0.20 | 0.04 | 0.06 | 0.12 | 0.23 | 0.03 | 0.04 | 0.05 | 0.07 | 0.05 | 0.13 | 0.39 | 0.71 |
| 286.12 | 278   | 310388 | 0.03 | 0.05 | 0.08 | 0.14 | 0.03 | 0.05 | 0.09 | 0.14 | 0.03 | 0.03 | 0.05 | 0.06 | 0.05 | 0.10 | 0.26 | 0.51 |
| 286.7  | 411   | 310388 | 0.03 | 0.05 | 0.11 | 0.19 | 0.04 | 0.06 | 0.12 | 0.21 | 0.03 | 0.04 | 0.05 | 0.07 | 0.05 | 0.12 | 0.37 | 0.68 |
| 287    | 1804  | 310388 | 0.05 | 0.11 | 0.32 | 0.61 | 0.05 | 0.13 | 0.37 | 0.68 | 0.03 | 0.05 | 0.10 | 0.18 | 0.10 | 0.39 | 0.92 | 1.00 |
| 287.3  | 1667  | 310388 | 0.05 | 0.11 | 0.30 | 0.57 | 0.05 | 0.12 | 0.34 | 0.65 | 0.03 | 0.05 | 0.10 | 0.17 | 0.10 | 0.37 | 0.90 | 1.00 |
| 287.31 | 415   | 310388 | 0.03 | 0.05 | 0.11 | 0.19 | 0.04 | 0.06 | 0.12 | 0.21 | 0.03 | 0.04 | 0.05 | 0.07 | 0.05 | 0.13 | 0.37 | 0.68 |
| 288    | 697   | 310388 | 0.04 | 0.07 | 0.15 | 0.28 | 0.04 | 0.07 | 0.17 | 0.33 | 0.03 | 0.04 | 0.06 | 0.09 | 0.06 | 0.18 | 0.56 | 0.88 |
| 288.1  | 3267  | 310388 | 0.06 | 0.17 | 0.51 | 0.85 | 0.06 | 0.19 | 0.59 | 0.90 | 0.04 | 0.07 | 0.15 | 0.28 | 0.15 | 0.62 | 1.00 | 1.00 |
| 288.11 | 3267  | 310388 | 0.06 | 0.17 | 0.51 | 0.85 | 0.06 | 0.19 | 0.59 | 0.90 | 0.04 | 0.07 | 0.15 | 0.28 | 0.15 | 0.62 | 1.00 | 1.00 |
| 289    | 954   | 310388 | 0.04 | 0.08 | 0.19 | 0.37 | 0.04 | 0.09 | 0.22 | 0.43 | 0.03 | 0.04 | 0.07 | 0.11 | 0.07 | 0.23 | 0.69 | 0.96 |
| 289.3  | 318   | 310388 | 0.03 | 0.05 | 0.09 | 0.15 | 0.03 | 0.05 | 0.10 | 0.17 | 0.03 | 0.03 | 0.05 | 0.06 | 0.05 | 0.11 | 0.30 | 0.57 |
| 289.4  | 2636  | 310388 | 0.05 | 0.14 | 0.43 | 0.77 | 0.06 | 0.16 | 0.50 | 0.84 | 0.04 | 0.06 | 0.13 | 0.24 | 0.13 | 0.53 | 0.98 | 1.00 |
| 289.5  | 514   | 310388 | 0.04 | 0.06 | 0.12 | 0.22 | 0.04 | 0.06 | 0.14 | 0.25 | 0.03 | 0.04 | 0.06 | 0.08 | 0.05 | 0.15 | 0.44 | 0.77 |
| 289.8  | 315   | 310063 | 0.03 | 0.05 | 0.09 | 0.15 | 0.03 | 0.05 | 0.10 | 0.17 | 0.03 | 0.03 | 0.05 | 0.06 | 0.05 | 0.11 | 0.29 | 0.57 |
| 290    | 2856  | 262912 | 0.06 | 0.15 | 0.46 | 0.80 | 0.06 | 0.15 | 0.53 | 0.86 | 0.04 | 0.06 | 0.14 | 0.25 | 0.13 | 0.56 | 0.99 | 1.00 |
| 290.1  | 1583  | 262912 | 0.05 | 0.10 | 0.28 | 0.55 | 0.05 | 0.11 | 0.33 | 0.62 | 0.03 | 0.05 | 0.09 | 0.16 | 0.09 | 0.35 | 0.89 | 1.00 |
| 290.11 | 666   | 262912 | 0.04 | 0.07 | 0.15 | 0.27 | 0.04 | 0.07 | 0.17 | 0.32 | 0.03 | 0.04 | 0.06 | 0.09 | 0.06 | 0.18 | 0.54 | 0.87 |
| 290.13 | 847   | 262912 | 0.04 | 0.07 | 0.17 | 0.33 | 0.04 | 0.08 | 0.20 | 0.39 | 0.03 | 0.04 | 0.07 | 0.11 | 0.07 | 0.21 | 0.64 | 0.94 |
| 290.16 | 361   | 262912 | 0.03 | 0.05 | 0.10 | 0.17 | 0.03 | 0.06 | 0.10 | 0.19 | 0.03 | 0.04 | 0.05 | 0.07 | 0.05 | 0.11 | 0.33 | 0.62 |
| 290.2  | 1157  | 262912 | 0.04 | 0.09 | 0.22 | 0.43 | 0.04 | 0.10 | 0.25 | 0.50 | 0.03 | 0.05 | 0.08 | 0.13 | 0.08 | 0.27 | 0.77 | 0.98 |
| 291    | 693   | 262912 | 0.04 | 0.07 | 0.15 | 0.28 | 0.04 | 0.07 | 0.17 | 0.33 | 0.03 | 0.04 | 0.06 | 0.09 | 0.06 | 0.18 | 0.56 | 0.88 |
| 291.8  | 484   | 262912 | 0.04 | 0.06 | 0.12 | 0.21 | 0.04 | 0.06 | 0.13 | 0.24 | 0.03 | 0.04 | 0.05 | 0.08 | 0.05 | 0.14 | 0.42 | 0.75 |
| 292    | 5218  | 262912 | 0.07 | 0.24 | 0.71 | 0.96 | 0.08 | 0.28 | 0.78 | 0.98 | 0.04 | 0.08 | 0.21 | 0.42 | 0.21 | 0.81 | 1.00 | 1.00 |
| 292.1  | 1626  | 262912 | 0.05 | 0.10 | 0.29 | 0.56 | 0.05 | 0.12 | 0.34 | 0.64 | 0.03 | 0.05 | 0.10 | 0.16 | 0.09 | 0.36 | 0.89 | 1.00 |
| 292.2  | 248   | 262912 | 0.03 | 0.05 | 0.08 | 0.13 | 0.03 | 0.05 | 0.09 | 0.15 | 0.03 | 0.03 | 0.04 | 0.06 | 0.04 | 0.09 | 0.24 | 0.47 |
| 292.3  | 730   | 262912 | 0.04 | 0.07 | 0.16 | 0.29 | 0.04 | 0.07 | 0.18 | 0.34 | 0.03 | 0.04 | 0.06 | 0.10 | 0.06 | 0.19 | 0.58 | 0.90 |
| 292.4  | 2527  | 262912 | 0.05 | 0.14 | 0.42 | 0.75 | 0.06 | 0.16 | 0.48 | 0.82 | 0.04 | 0.06 | 0.13 | 0.23 | 0.12 | 0.51 | 0.98 | 1.00 |
| 292.6  | 350   | 262912 | 0.03 | 0.05 | 0.10 | 0.16 | 0.03 | 0.05 | 0.11 | 0.19 | 0.03 | 0.05 | 0.04 | 0.05 | 0.05 | 0.11 | 0.32 | 0.61 |
| 293    | 1929  | 262912 | 0.05 | 0.12 | 0.33 | 0.63 | 0.05 | 0.13 | 0.39 | 0.71 | 0.03 | 0.05 | 0.11 | 0.19 | 0.10 | 0.42 | 0.94 | 1.00 |
| 293.1  | 832   | 262912 | 0.04 | 0.07 | 0.17 | 0.33 | 0.04 | 0.08 | 0.20 | 0.38 | 0.03 | 0.04 | 0.07 | 0.10 | 0.07 | 0.21 | 0.63 | 0.93 |
| 295    | 793   | 262912 | 0.04 | 0.07 | 0.16 | 0.31 | 0.04 | 0.08 | 0.19 | 0.37 | 0.03 | 0.04 | 0.07 | 0.10 | 0.07 | 0.20 | 0.61 | 0.92 |
| 295.1  | 513   | 262912 | 0.04 | 0.06 | 0.12 | 0.22 | 0.04 | 0.06 | 0.14 | 0.25 | 0.03 | 0.04 | 0.06 | 0.08 | 0.05 | 0.15 | 0.44 | 0.77 |
| 296    | 13263 | 262912 | 0.12 | 0.50 | 0.98 | 1.00 | 0.14 | 0.58 | 0.99 | 1.00 | 0.06 | 0.15 | 0.45 | 0.78 | 0.43 | 0.99 | 1.00 | 1.00 |
| 296.1  | 1015  | 262912 | 0.04 | 0.08 | 0.20 | 0.39 | 0.04 | 0.09 | 0.23 | 0.45 | 0.03 | 0.04 | 0.07 | 0.12 | 0.07 | 0.24 | 0.72 | 0.97 |
| 296.2  | 12701 | 262912 | 0.12 | 0.49 | 0.97 | 1.00 | 0.13 | 0.56 | 0.99 | 1.00 | 0.05 | 0.14 | 0.43 | 0.77 | 0.42 | 0.99 | 1.00 | 1.00 |
| 296.22 | 12629 | 262912 | 0.12 | 0.49 | 0.97 | 1.00 | 0.13 | 0.56 | 0.99 | 1.00 | 0.05 | 0.14 | 0.43 | 0.76 | 0.42 | 0.99 | 1.00 | 1.00 |
| 297    | 1529  | 262912 | 0.05 | 0.10 | 0.28 | 0.54 | 0.05 | 0.11 | 0.32 | 0.61 | 0.03 | 0.05 | 0.09 | 0.16 | 0.09 | 0.34 | 0.88 | 1.00 |
| 297.2  | 1457  | 262912 | 0.05 | 0.10 | 0.27 | 0.52 | 0.05 | 0.11 | 0.31 | 0.59 | 0.03 | 0.05 | 0.09 | 0.15 | 0.09 | 0.33 | 0.86 | 1.00 |
| 300    | 8295  | 262912 | 0.09 | 0.35 | 0.88 | 1.00 | 0.10 | 0.40 | 0.93 | 1.00 | 0.05 | 0.11 | 0.31 | 0.59 | 0.30 | 0.95 | 1.00 | 1.00 |
| 300.1  | 7701  | 262912 | 0.09 | 0.33 | 0.86 | 1.00 | 0.10 | 0.38 | 0.91 | 1.00 | 0.05 | 0.10 | 0.29 | 0.56 | 0.28 | 0.93 | 1.00 | 1.00 |
| 300.12 | 820   | 262912 | 0.04 | 0.07 | 0.17 | 0.32 | 0.04 | 0.08 | 0.19 | 0.38 | 0.03 | 0.04 | 0.07 | 0.10 | 0.07 | 0.21 | 0.63 | 0.93 |
| 300.13 | 649   | 262912 | 0.04 | 0.07 | 0.14 | 0.27 | 0.04 | 0.07 | 0.16 | 0.31 | 0.03 | 0.04 | 0.06 | 0.09 | 0.06 | 0.17 | 0.53 | 0.86 |
| 301    | 338   | 262912 | 0.03 | 0.05 | 0.09 | 0.16 | 0.03 | 0.05 | 0.10 | 0.18 | 0.03 | 0.04 | 0.05 | 0.07 | 0.05 | 0.11 | 0.31 | 0.59 |
| 302    | 279   | 262912 | 0.03 | 0.05 | 0.08 | 0.14 | 0.03 | 0.05 | 0.09 | 0.16 | 0.03 | 0.03 | 0.05 | 0.06 | 0.05 | 0.10 | 0.27 | 0.52 |
| 303    | 457   | 262912 | 0.04 | 0.06 | 0.11 | 0.20 | 0.04 | 0.06 | 0.13 | 0.23 | 0.03 | 0.04 | 0.05 | 0.08 | 0.05 | 0.13 | 0.40 | 0.73 |
| 303.3  | 339   | 262912 | 0.03 | 0.05 | 0.09 | 0.16 | 0.03 | 0.05 | 0.10 | 0.18 | 0.03 | 0.04 | 0.05 | 0.07 | 0.05 | 0.11 | 0.31 | 0.60 |
| 304    | 258   | 262912 | 0.03 | 0.05 | 0.08 | 0.13 | 0.03 | 0.05 | 0.09 | 0.15 | 0.03 | 0.03 | 0.04 | 0.06 | 0.04 | 0.09 | 0.25 | 0.49 |
| 306    | 39468 | 262912 | 0.25 | 0.90 | 1.00 | 1.00 | 0.29 | 0.94 | 1.00 | 1.00 | 0.09 | 0.33 | 0.85 | 0.99 | 0.84 | 1.00 | 1.00 | 1.00 |
| 306.9  | 280   | 262912 | 0.03 | 0.05 | 0.08 | 0.14 | 0.03 | 0.05 | 0.09 | 0.16 | 0.03 | 0.03 | 0.05 | 0.06 | 0.05 | 0.10 | 0.27 | 0.52 |
| 315    | 563   | 262912 | 0.04 | 0.06 | 0.13 | 0.24 |      |      |      |      |      |      |      |      |      |      |      |      |

|        |       |        |      |      |      |      |      |      |      |      |      |      |      |      |      |      |      |      |
|--------|-------|--------|------|------|------|------|------|------|------|------|------|------|------|------|------|------|------|------|
| 318    | 18403 | 262912 | 0.15 | 0.63 | 1.00 | 1.00 | 0.17 | 0.71 | 1.00 | 1.00 | 0.06 | 0.19 | 0.57 | 0.89 | 0.55 | 1.00 | 1.00 | 1.00 |
| 320    | 391   | 295570 | 0.03 | 0.05 | 0.10 | 0.18 | 0.04 | 0.06 | 0.11 | 0.20 | 0.03 | 0.04 | 0.05 | 0.07 | 0.05 | 0.12 | 0.35 | 0.66 |
| 323    | 349   | 295570 | 0.03 | 0.05 | 0.10 | 0.16 | 0.03 | 0.05 | 0.11 | 0.19 | 0.03 | 0.04 | 0.05 | 0.07 | 0.05 | 0.11 | 0.32 | 0.61 |
| 324    | 305   | 295570 | 0.03 | 0.05 | 0.09 | 0.15 | 0.03 | 0.05 | 0.10 | 0.17 | 0.03 | 0.03 | 0.05 | 0.06 | 0.05 | 0.10 | 0.29 | 0.55 |
| 327    | 1210  | 295570 | 0.04 | 0.09 | 0.23 | 0.45 | 0.05 | 0.09 | 0.23 | 0.26 | 0.03 | 0.05 | 0.08 | 0.13 | 0.08 | 0.28 | 0.79 | 0.99 |
| 327.3  | 4435  | 295570 | 0.07 | 0.21 | 0.64 | 0.94 | 0.07 | 0.24 | 0.72 | 0.97 | 0.04 | 0.08 | 0.19 | 0.36 | 0.18 | 0.75 | 1.00 | 1.00 |
| 331    | 1287  | 295570 | 0.04 | 0.09 | 0.24 | 0.47 | 0.05 | 0.10 | 0.28 | 0.54 | 0.03 | 0.05 | 0.08 | 0.14 | 0.08 | 0.30 | 0.82 | 0.99 |
| 331.1  | 515   | 295570 | 0.04 | 0.06 | 0.12 | 0.22 | 0.04 | 0.06 | 0.14 | 0.26 | 0.03 | 0.04 | 0.06 | 0.08 | 0.06 | 0.15 | 0.44 | 0.77 |
| 331.9  | 514   | 295570 | 0.04 | 0.06 | 0.12 | 0.22 | 0.04 | 0.06 | 0.14 | 0.25 | 0.03 | 0.04 | 0.06 | 0.08 | 0.05 | 0.15 | 0.44 | 0.77 |
| 332    | 1345  | 295570 | 0.04 | 0.09 | 0.25 | 0.49 | 0.05 | 0.09 | 0.29 | 0.56 | 0.03 | 0.05 | 0.09 | 0.14 | 0.08 | 0.31 | 0.83 | 0.99 |
| 333    | 1094  | 295570 | 0.04 | 0.08 | 0.21 | 0.41 | 0.04 | 0.09 | 0.24 | 0.47 | 0.03 | 0.05 | 0.08 | 0.12 | 0.08 | 0.26 | 0.75 | 0.98 |
| 333.1  | 271   | 295570 | 0.03 | 0.05 | 0.08 | 0.14 | 0.03 | 0.05 | 0.09 | 0.16 | 0.03 | 0.03 | 0.05 | 0.06 | 0.04 | 0.10 | 0.26 | 0.50 |
| 333.4  | 265   | 295570 | 0.03 | 0.05 | 0.08 | 0.13 | 0.03 | 0.05 | 0.09 | 0.15 | 0.03 | 0.03 | 0.05 | 0.06 | 0.04 | 0.10 | 0.25 | 0.50 |
| 334    | 1896  | 295570 | 0.05 | 0.12 | 0.33 | 0.63 | 0.05 | 0.12 | 0.38 | 0.70 | 0.03 | 0.05 | 0.10 | 0.18 | 0.10 | 0.41 | 0.93 | 1.00 |
| 334.2  | 277   | 295570 | 0.03 | 0.05 | 0.08 | 0.14 | 0.03 | 0.05 | 0.09 | 0.16 | 0.03 | 0.03 | 0.05 | 0.06 | 0.05 | 0.10 | 0.26 | 0.51 |
| 335    | 1222  | 295570 | 0.04 | 0.09 | 0.23 | 0.45 | 0.05 | 0.10 | 0.27 | 0.52 | 0.03 | 0.05 | 0.08 | 0.13 | 0.08 | 0.29 | 0.80 | 0.99 |
| 337    | 355   | 295570 | 0.03 | 0.05 | 0.10 | 0.17 | 0.03 | 0.05 | 0.11 | 0.19 | 0.03 | 0.04 | 0.05 | 0.07 | 0.05 | 0.11 | 0.32 | 0.62 |
| 338    | 742   | 295570 | 0.04 | 0.07 | 0.16 | 0.30 | 0.04 | 0.07 | 0.18 | 0.35 | 0.03 | 0.04 | 0.06 | 0.10 | 0.06 | 0.19 | 0.58 | 0.90 |
| 338.1  | 363   | 295570 | 0.03 | 0.05 | 0.10 | 0.17 | 0.03 | 0.06 | 0.11 | 0.19 | 0.03 | 0.04 | 0.05 | 0.07 | 0.05 | 0.12 | 0.33 | 0.63 |
| 338.2  | 387   | 295570 | 0.03 | 0.05 | 0.10 | 0.18 | 0.04 | 0.06 | 0.11 | 0.20 | 0.03 | 0.04 | 0.05 | 0.07 | 0.05 | 0.12 | 0.35 | 0.65 |
| 339    | 7243  | 295570 | 0.09 | 0.31 | 0.84 | 0.99 | 0.09 | 0.36 | 0.90 | 1.00 | 0.05 | 0.10 | 0.28 | 0.54 | 0.27 | 0.92 | 1.00 | 1.00 |
| 340    | 2962  | 295570 | 0.06 | 0.16 | 0.48 | 0.81 | 0.06 | 0.16 | 0.55 | 0.87 | 0.04 | 0.06 | 0.14 | 0.26 | 0.14 | 0.58 | 0.99 | 1.00 |
| 340.1  | 217   | 295570 | 0.03 | 0.04 | 0.07 | 0.12 | 0.03 | 0.05 | 0.08 | 0.13 | 0.03 | 0.03 | 0.04 | 0.05 | 0.04 | 0.09 | 0.22 | 0.42 |
| 341    | 221   | 295570 | 0.03 | 0.04 | 0.08 | 0.12 | 0.03 | 0.05 | 0.08 | 0.13 | 0.03 | 0.03 | 0.04 | 0.06 | 0.04 | 0.09 | 0.22 | 0.43 |
| 342    | 1600  | 295570 | 0.05 | 0.10 | 0.29 | 0.55 | 0.05 | 0.12 | 0.33 | 0.63 | 0.03 | 0.05 | 0.09 | 0.16 | 0.09 | 0.36 | 0.89 | 1.00 |
| 344    | 658   | 295570 | 0.04 | 0.07 | 0.14 | 0.27 | 0.04 | 0.07 | 0.16 | 0.31 | 0.03 | 0.04 | 0.06 | 0.09 | 0.06 | 0.17 | 0.53 | 0.87 |
| 345    | 4890  | 295570 | 0.07 | 0.23 | 0.68 | 0.95 | 0.08 | 0.23 | 0.76 | 0.98 | 0.04 | 0.08 | 0.20 | 0.39 | 0.20 | 0.79 | 1.00 | 1.00 |
| 345.1  | 877   | 295570 | 0.04 | 0.07 | 0.18 | 0.34 | 0.04 | 0.08 | 0.20 | 0.40 | 0.03 | 0.04 | 0.07 | 0.11 | 0.07 | 0.22 | 0.66 | 0.94 |
| 345.11 | 423   | 295570 | 0.03 | 0.05 | 0.11 | 0.19 | 0.04 | 0.06 | 0.12 | 0.22 | 0.03 | 0.04 | 0.05 | 0.07 | 0.05 | 0.13 | 0.37 | 0.69 |
| 345.12 | 273   | 295570 | 0.03 | 0.05 | 0.08 | 0.14 | 0.03 | 0.05 | 0.09 | 0.16 | 0.03 | 0.03 | 0.05 | 0.06 | 0.04 | 0.10 | 0.26 | 0.51 |
| 345.3  | 2204  | 295570 | 0.05 | 0.13 | 0.37 | 0.69 | 0.05 | 0.13 | 0.43 | 0.77 | 0.04 | 0.06 | 0.12 | 0.21 | 0.11 | 0.46 | 0.96 | 1.00 |
| 348    | 854   | 295570 | 0.04 | 0.07 | 0.17 | 0.34 | 0.04 | 0.08 | 0.20 | 0.39 | 0.03 | 0.04 | 0.07 | 0.11 | 0.07 | 0.21 | 0.64 | 0.94 |
| 348.2  | 280   | 295570 | 0.03 | 0.05 | 0.08 | 0.14 | 0.03 | 0.05 | 0.09 | 0.16 | 0.03 | 0.03 | 0.05 | 0.06 | 0.05 | 0.10 | 0.27 | 0.52 |
| 348.7  | 338   | 295570 | 0.03 | 0.05 | 0.09 | 0.16 | 0.03 | 0.05 | 0.10 | 0.18 | 0.03 | 0.04 | 0.05 | 0.07 | 0.05 | 0.11 | 0.31 | 0.59 |
| 348.8  | 267   | 295570 | 0.03 | 0.05 | 0.08 | 0.14 | 0.03 | 0.05 | 0.09 | 0.15 | 0.03 | 0.03 | 0.05 | 0.06 | 0.04 | 0.10 | 0.26 | 0.50 |
| 348.9  | 440   | 295570 | 0.03 | 0.06 | 0.11 | 0.20 | 0.04 | 0.06 | 0.12 | 0.22 | 0.03 | 0.04 | 0.05 | 0.07 | 0.05 | 0.13 | 0.39 | 0.71 |
| 349    | 403   | 295570 | 0.03 | 0.05 | 0.10 | 0.18 | 0.04 | 0.06 | 0.12 | 0.21 | 0.03 | 0.04 | 0.05 | 0.07 | 0.05 | 0.12 | 0.36 | 0.67 |
| 350    | 3488  | 295570 | 0.06 | 0.18 | 0.54 | 0.87 | 0.07 | 0.20 | 0.61 | 0.92 | 0.04 | 0.07 | 0.16 | 0.30 | 0.15 | 0.65 | 1.00 | 1.00 |
| 350.1  | 968   | 295570 | 0.04 | 0.08 | 0.19 | 0.37 | 0.04 | 0.09 | 0.19 | 0.22 | 0.03 | 0.04 | 0.07 | 0.11 | 0.07 | 0.24 | 0.70 | 0.96 |
| 350.2  | 2371  | 295570 | 0.05 | 0.13 | 0.40 | 0.72 | 0.06 | 0.15 | 0.46 | 0.80 | 0.04 | 0.06 | 0.12 | 0.22 | 0.12 | 0.49 | 0.97 | 1.00 |
| 350.3  | 368   | 295570 | 0.03 | 0.05 | 0.10 | 0.17 | 0.03 | 0.06 | 0.11 | 0.20 | 0.03 | 0.04 | 0.05 | 0.07 | 0.05 | 0.12 | 0.33 | 0.63 |
| 351    | 11404 | 295570 | 0.11 | 0.45 | 0.96 | 1.00 | 0.12 | 0.52 | 0.98 | 1.00 | 0.05 | 0.13 | 0.40 | 0.72 | 0.39 | 0.99 | 1.00 | 1.00 |
| 352    | 1378  | 295570 | 0.04 | 0.09 | 0.25 | 0.49 | 0.05 | 0.11 | 0.29 | 0.57 | 0.03 | 0.05 | 0.09 | 0.15 | 0.09 | 0.32 | 0.84 | 0.99 |
| 352.1  | 485   | 295570 | 0.04 | 0.06 | 0.12 | 0.21 | 0.04 | 0.06 | 0.12 | 0.21 | 0.03 | 0.04 | 0.05 | 0.08 | 0.05 | 0.14 | 0.42 | 0.75 |
| 352.2  | 842   | 295570 | 0.04 | 0.07 | 0.17 | 0.33 | 0.04 | 0.08 | 0.20 | 0.38 | 0.03 | 0.04 | 0.07 | 0.11 | 0.07 | 0.21 | 0.64 | 0.93 |
| 353    | 2069  | 295570 | 0.05 | 0.12 | 0.36 | 0.66 | 0.05 | 0.12 | 0.41 | 0.74 | 0.03 | 0.06 | 0.11 | 0.20 | 0.11 | 0.44 | 0.95 | 1.00 |
| 355    | 329   | 295570 | 0.03 | 0.05 | 0.09 | 0.16 | 0.03 | 0.05 | 0.10 | 0.18 | 0.03 | 0.03 | 0.05 | 0.06 | 0.05 | 0.11 | 0.30 | 0.58 |
| 357    | 1558  | 295570 | 0.05 | 0.10 | 0.28 | 0.54 | 0.05 | 0.10 | 0.33 | 0.62 | 0.03 | 0.05 | 0.09 | 0.16 | 0.09 | 0.35 | 0.88 | 1.00 |
| 358    | 210   | 295570 | 0.03 | 0.04 | 0.07 | 0.12 | 0.03 | 0.05 | 0.08 | 0.13 | 0.03 | 0.03 | 0.04 | 0.05 | 0.04 | 0.08 | 0.21 | 0.41 |
| 359    | 439   | 295570 | 0.03 | 0.06 | 0.11 | 0.20 | 0.04 | 0.06 | 0.12 | 0.22 | 0.03 | 0.04 | 0.05 | 0.07 | 0.05 | 0.13 | 0.39 | 0.71 |
| 359.2  | 337   | 295570 | 0.03 | 0.05 | 0.09 | 0.16 | 0.03 | 0.05 | 0.10 | 0.18 | 0.03 | 0.04 | 0.05 | 0.07 | 0.05 | 0.11 | 0.31 | 0.59 |
| 360    | 315   | 287331 | 0.03 | 0.05 | 0.09 | 0.15 | 0.03 | 0.05 | 0.09 | 0.10 | 0.03 | 0.03 | 0.05 | 0.06 | 0.05 | 0.11 | 0.29 | 0.57 |
| 360.2  | 227   | 287331 | 0.03 | 0.04 | 0.08 | 0.12 | 0.03 | 0.05 | 0.08 | 0.14 | 0.03 | 0.03 | 0.04 | 0.06 | 0.04 | 0.09 | 0.22 | 0.44 |
| 361    | 3118  | 287331 | 0.06 | 0.16 | 0.49 | 0.83 | 0.06 | 0.18 | 0.57 | 0.89 | 0.04 | 0.07 | 0.15 | 0.27 | 0.14 | 0.60 | 0.99 | 1.00 |
| 361.1  | 1401  | 287331 | 0.04 | 0.10 | 0.26 | 0.50 | 0.05 | 0.11 | 0.30 | 0.57 | 0.03 | 0.05 | 0.09 | 0.15 | 0.09 | 0.32 | 0.85 | 0.99 |
| 362    | 5021  | 286896 | 0.07 | 0.23 | 0.69 | 0.96 | 0.08 | 0.27 | 0.77 | 0.98 | 0.04 | 0.08 | 0.21 | 0.40 | 0.20 | 0.80 | 1.00 | 1.00 |
| 362.2  | 2640  | 286896 | 0.05 | 0.14 | 0.43 | 0.77 | 0.06 | 0.16 | 0.50 | 0.84 | 0.04 | 0.06 | 0.13 | 0.24 | 0.13 | 0.53 | 0.98 | 1.00 |
| 362.29 | 2637  | 286896 | 0.05 | 0.14 | 0.43 | 0.77 | 0.06 | 0.16 | 0.50 | 0.84 | 0.04 | 0.06 | 0.13 | 0.24 | 0.13 | 0.53 | 0.98 | 1.00 |
| 362.3  | 1059  | 286896 | 0.04 | 0.08 | 0.21 | 0.40 | 0.04 | 0.09 | 0.24 | 0.46 | 0.03 | 0.04 | 0.08 | 0.12 | 0.07 | 0.25 | 0.74 | 0.97 |
| 362.31 | 1003  | 286896 | 0.04 | 0.08 | 0.20 | 0.38 | 0.04 | 0.09 | 0.23 | 0.44 | 0.03 | 0.04 | 0.07 | 0.12 | 0.07 | 0.24 | 0.71 | 0.97 |
| 362.4  | 872   | 286896 | 0.04 | 0.07 | 0.18 | 0.34 | 0.04 | 0.08 | 0.20 | 0.39 | 0.03 | 0.04 | 0.07 | 0.11 | 0.07 | 0.22 | 0.65 | 0.94 |
| 364    | 751   | 287331 | 0.04 | 0.07 | 0.16 | 0.30 | 0.04 | 0.08 | 0.18 | 0.35 | 0.03 | 0.04 | 0.06 | 0.10 | 0.06 | 0.19 | 0.59 | 0.91 |
| 364.4  | 240   | 287331 | 0.03 | 0.05 | 0.08 | 0.13 | 0.03 | 0.05 | 0.09 | 0.14 | 0.03 | 0.03 | 0.04 | 0.06 | 0.04 | 0.09 | 0.23 | 0.46 |
| 364.5  | 236   | 287331 | 0.03 | 0.05 | 0.08 | 0.12 | 0.03 | 0.05 | 0.09 | 0.14 | 0.03 | 0.03 | 0.04 | 0.06 | 0.04 | 0.09 | 0.23 | 0.45 |
| 365    | 4986  | 287331 | 0.07 | 0.23 | 0.69 | 0.96 | 0.08 | 0.27 | 0.76 | 0.98 | 0.04 | 0.08 | 0.21 | 0.40 | 0.20 | 0.80 | 1.00 | 1.00 |
| 365.1  | 1216  | 287331 | 0.04 | 0.09 | 0.23 | 0.45 | 0.05 | 0.10 | 0.27 | 0.52 | 0.03 | 0.05 | 0.08 | 0.13 | 0.08 | 0.28 | 0.79 | 0.99 |
| 365.11 | 1212  | 287331 | 0.04 | 0.09 | 0.23 | 0.45 | 0.05 | 0.10 | 0.26 | 0.51 | 0.03 | 0.05 | 0.08 | 0.13 | 0.08 | 0.28 | 0.79 | 0.99 |
| 365.2  | 742   | 287331 | 0.04 | 0.07 | 0.16 | 0.30 | 0.04 | 0.08 | 0.18 | 0.35 | 0.03 | 0.04 | 0.06 | 0.10 | 0.06 | 0.19 | 0.58 | 0.90 |
| 366    | 22347 | 287331 | 0.17 | 0.71 | 1.00 | 1.00 | 0.20 | 0.79 | 1.00 | 1.00 | 0.07 | 0.22 | 0.65 | 0.94 | 0.63 | 1.00 | 1.00 | 1.00 |
| 366.2  | 9863  | 287331 | 0.10 | 0.40 | 0.93 | 1.00 | 0.11 | 0.46 | 0.96 |      |      |      |      |      |      |      |      |      |

|        |       |        |      |      |      |      |      |      |      |      |      |      |      |      |      |      |      |      |
|--------|-------|--------|------|------|------|------|------|------|------|------|------|------|------|------|------|------|------|------|
| 367.9  | 950   | 287331 | 0.04 | 0.08 | 0.19 | 0.37 | 0.04 | 0.09 | 0.22 | 0.42 | 0.03 | 0.04 | 0.07 | 0.11 | 0.07 | 0.23 | 0.69 | 0.96 |
| 368    | 3085  | 287331 | 0.06 | 0.16 | 0.49 | 0.83 | 0.06 | 0.18 | 0.56 | 0.89 | 0.04 | 0.07 | 0.14 | 0.27 | 0.14 | 0.60 | 0.99 | 1.00 |
| 368.1  | 607   | 287331 | 0.04 | 0.06 | 0.14 | 0.25 | 0.04 | 0.07 | 0.15 | 0.29 | 0.03 | 0.04 | 0.06 | 0.09 | 0.06 | 0.16 | 0.50 | 0.84 |
| 368.2  | 723   | 287331 | 0.04 | 0.07 | 0.15 | 0.29 | 0.04 | 0.07 | 0.18 | 0.34 | 0.03 | 0.04 | 0.06 | 0.10 | 0.06 | 0.19 | 0.57 | 0.90 |
| 368.4  | 370   | 287331 | 0.03 | 0.05 | 0.10 | 0.17 | 0.03 | 0.05 | 0.10 | 0.17 | 0.03 | 0.04 | 0.05 | 0.07 | 0.05 | 0.12 | 0.34 | 0.63 |
| 368.9  | 635   | 287331 | 0.04 | 0.06 | 0.14 | 0.26 | 0.04 | 0.07 | 0.16 | 0.30 | 0.03 | 0.04 | 0.06 | 0.09 | 0.06 | 0.17 | 0.52 | 0.85 |
| 368.91 | 222   | 287331 | 0.03 | 0.04 | 0.08 | 0.12 | 0.03 | 0.05 | 0.08 | 0.13 | 0.03 | 0.03 | 0.04 | 0.06 | 0.04 | 0.09 | 0.22 | 0.43 |
| 369    | 574   | 287331 | 0.04 | 0.06 | 0.13 | 0.24 | 0.04 | 0.07 | 0.15 | 0.28 | 0.03 | 0.04 | 0.06 | 0.08 | 0.06 | 0.16 | 0.48 | 0.82 |
| 369.5  | 241   | 287331 | 0.03 | 0.05 | 0.08 | 0.13 | 0.03 | 0.05 | 0.08 | 0.13 | 0.03 | 0.03 | 0.04 | 0.06 | 0.04 | 0.09 | 0.24 | 0.46 |
| 370    | 283   | 287331 | 0.03 | 0.05 | 0.09 | 0.14 | 0.03 | 0.05 | 0.09 | 0.14 | 0.03 | 0.05 | 0.03 | 0.05 | 0.05 | 0.10 | 0.27 | 0.52 |
| 371    | 2760  | 287331 | 0.06 | 0.15 | 0.45 | 0.78 | 0.06 | 0.17 | 0.52 | 0.85 | 0.04 | 0.06 | 0.13 | 0.25 | 0.13 | 0.55 | 0.99 | 1.00 |
| 371.1  | 485   | 287331 | 0.04 | 0.06 | 0.12 | 0.21 | 0.04 | 0.06 | 0.13 | 0.24 | 0.03 | 0.04 | 0.05 | 0.08 | 0.05 | 0.14 | 0.42 | 0.75 |
| 371.3  | 2161  | 287331 | 0.05 | 0.13 | 0.37 | 0.68 | 0.05 | 0.14 | 0.43 | 0.76 | 0.04 | 0.06 | 0.11 | 0.20 | 0.11 | 0.46 | 0.96 | 1.00 |
| 372    | 731   | 287331 | 0.04 | 0.07 | 0.16 | 0.29 | 0.04 | 0.07 | 0.18 | 0.29 | 0.03 | 0.04 | 0.06 | 0.10 | 0.06 | 0.19 | 0.58 | 0.90 |
| 374    | 5327  | 287331 | 0.07 | 0.24 | 0.72 | 0.97 | 0.08 | 0.28 | 0.79 | 0.99 | 0.04 | 0.09 | 0.22 | 0.42 | 0.21 | 0.82 | 1.00 | 1.00 |
| 374.1  | 1101  | 287331 | 0.04 | 0.08 | 0.21 | 0.41 | 0.04 | 0.09 | 0.24 | 0.48 | 0.03 | 0.05 | 0.08 | 0.12 | 0.08 | 0.26 | 0.75 | 0.98 |
| 374.3  | 1725  | 287331 | 0.05 | 0.11 | 0.31 | 0.59 | 0.05 | 0.12 | 0.35 | 0.66 | 0.03 | 0.05 | 0.10 | 0.17 | 0.10 | 0.38 | 0.91 | 1.00 |
| 375    | 2085  | 287331 | 0.05 | 0.12 | 0.36 | 0.67 | 0.05 | 0.12 | 0.41 | 0.74 | 0.04 | 0.06 | 0.11 | 0.20 | 0.11 | 0.44 | 0.95 | 1.00 |
| 375.2  | 840   | 287331 | 0.04 | 0.07 | 0.17 | 0.33 | 0.04 | 0.08 | 0.20 | 0.38 | 0.03 | 0.04 | 0.07 | 0.10 | 0.07 | 0.21 | 0.64 | 0.93 |
| 377    | 438   | 287331 | 0.03 | 0.06 | 0.11 | 0.19 | 0.04 | 0.06 | 0.12 | 0.22 | 0.03 | 0.04 | 0.05 | 0.07 | 0.05 | 0.13 | 0.39 | 0.71 |
| 377.3  | 234   | 287331 | 0.03 | 0.05 | 0.08 | 0.12 | 0.03 | 0.05 | 0.08 | 0.14 | 0.03 | 0.03 | 0.04 | 0.06 | 0.04 | 0.09 | 0.23 | 0.45 |
| 378    | 1329  | 287331 | 0.04 | 0.09 | 0.25 | 0.48 | 0.05 | 0.10 | 0.29 | 0.55 | 0.03 | 0.05 | 0.09 | 0.14 | 0.08 | 0.31 | 0.83 | 0.99 |
| 378.1  | 836   | 287331 | 0.04 | 0.07 | 0.17 | 0.33 | 0.04 | 0.08 | 0.20 | 0.38 | 0.03 | 0.04 | 0.07 | 0.10 | 0.07 | 0.21 | 0.63 | 0.93 |
| 378.2  | 209   | 287331 | 0.03 | 0.04 | 0.07 | 0.12 | 0.03 | 0.05 | 0.08 | 0.13 | 0.03 | 0.03 | 0.04 | 0.05 | 0.04 | 0.08 | 0.21 | 0.41 |
| 378.5  | 264   | 287331 | 0.03 | 0.05 | 0.08 | 0.13 | 0.03 | 0.05 | 0.09 | 0.15 | 0.03 | 0.03 | 0.04 | 0.06 | 0.04 | 0.09 | 0.25 | 0.49 |
| 379    | 4107  | 287331 | 0.07 | 0.20 | 0.61 | 0.92 | 0.07 | 0.23 | 0.68 | 0.92 | 0.04 | 0.07 | 0.18 | 0.34 | 0.17 | 0.72 | 1.00 | 1.00 |
| 379.2  | 1443  | 287331 | 0.05 | 0.10 | 0.26 | 0.51 | 0.05 | 0.10 | 0.31 | 0.59 | 0.03 | 0.05 | 0.09 | 0.15 | 0.09 | 0.33 | 0.86 | 1.00 |
| 379.3  | 2166  | 287331 | 0.05 | 0.13 | 0.37 | 0.68 | 0.05 | 0.14 | 0.43 | 0.76 | 0.04 | 0.06 | 0.11 | 0.20 | 0.11 | 0.46 | 0.96 | 1.00 |
| 379.5  | 371   | 287331 | 0.03 | 0.05 | 0.10 | 0.17 | 0.03 | 0.06 | 0.11 | 0.20 | 0.03 | 0.04 | 0.05 | 0.07 | 0.05 | 0.12 | 0.34 | 0.63 |
| 380    | 614   | 287331 | 0.04 | 0.06 | 0.14 | 0.26 | 0.04 | 0.07 | 0.16 | 0.30 | 0.03 | 0.04 | 0.06 | 0.09 | 0.06 | 0.17 | 0.51 | 0.84 |
| 380.1  | 478   | 287331 | 0.04 | 0.06 | 0.12 | 0.21 | 0.04 | 0.06 | 0.12 | 0.24 | 0.03 | 0.04 | 0.05 | 0.08 | 0.05 | 0.14 | 0.41 | 0.74 |
| 380.4  | 323   | 287331 | 0.03 | 0.05 | 0.09 | 0.15 | 0.03 | 0.05 | 0.10 | 0.18 | 0.03 | 0.03 | 0.05 | 0.06 | 0.05 | 0.11 | 0.30 | 0.58 |
| 381    | 2003  | 287331 | 0.05 | 0.12 | 0.35 | 0.65 | 0.05 | 0.13 | 0.40 | 0.73 | 0.03 | 0.06 | 0.11 | 0.19 | 0.11 | 0.43 | 0.95 | 1.00 |
| 381.1  | 1613  | 287331 | 0.05 | 0.10 | 0.29 | 0.56 | 0.05 | 0.12 | 0.33 | 0.63 | 0.03 | 0.05 | 0.10 | 0.16 | 0.09 | 0.36 | 0.89 | 1.00 |
| 381.11 | 739   | 287331 | 0.04 | 0.07 | 0.16 | 0.30 | 0.04 | 0.07 | 0.18 | 0.34 | 0.03 | 0.04 | 0.06 | 0.10 | 0.06 | 0.19 | 0.58 | 0.90 |
| 381.9  | 242   | 287331 | 0.03 | 0.05 | 0.08 | 0.13 | 0.03 | 0.05 | 0.09 | 0.14 | 0.03 | 0.03 | 0.04 | 0.06 | 0.04 | 0.09 | 0.24 | 0.46 |
| 382    | 288   | 287331 | 0.03 | 0.05 | 0.09 | 0.14 | 0.03 | 0.05 | 0.10 | 0.16 | 0.03 | 0.03 | 0.05 | 0.06 | 0.05 | 0.10 | 0.27 | 0.53 |
| 383    | 275   | 287331 | 0.03 | 0.05 | 0.08 | 0.14 | 0.03 | 0.05 | 0.09 | 0.16 | 0.03 | 0.03 | 0.05 | 0.06 | 0.05 | 0.10 | 0.26 | 0.51 |
| 384    | 1161  | 287331 | 0.04 | 0.09 | 0.22 | 0.43 | 0.04 | 0.10 | 0.26 | 0.43 | 0.03 | 0.05 | 0.08 | 0.13 | 0.08 | 0.27 | 0.77 | 0.98 |
| 384.4  | 894   | 287331 | 0.04 | 0.08 | 0.18 | 0.35 | 0.04 | 0.08 | 0.21 | 0.35 | 0.03 | 0.04 | 0.07 | 0.11 | 0.07 | 0.22 | 0.66 | 0.95 |
| 385    | 768   | 287331 | 0.04 | 0.07 | 0.16 | 0.31 | 0.04 | 0.08 | 0.18 | 0.36 | 0.03 | 0.04 | 0.07 | 0.10 | 0.06 | 0.20 | 0.60 | 0.91 |
| 385.3  | 521   | 287331 | 0.04 | 0.06 | 0.12 | 0.22 | 0.04 | 0.06 | 0.14 | 0.26 | 0.03 | 0.04 | 0.06 | 0.08 | 0.06 | 0.15 | 0.44 | 0.78 |
| 386    | 1729  | 287331 | 0.05 | 0.11 | 0.31 | 0.59 | 0.05 | 0.12 | 0.35 | 0.66 | 0.03 | 0.05 | 0.10 | 0.17 | 0.10 | 0.38 | 0.91 | 1.00 |
| 386.1  | 559   | 287331 | 0.04 | 0.06 | 0.13 | 0.24 | 0.04 | 0.07 | 0.15 | 0.27 | 0.03 | 0.04 | 0.06 | 0.08 | 0.06 | 0.15 | 0.47 | 0.81 |
| 386.2  | 464   | 287331 | 0.04 | 0.06 | 0.11 | 0.20 | 0.04 | 0.06 | 0.13 | 0.23 | 0.03 | 0.04 | 0.05 | 0.08 | 0.05 | 0.14 | 0.40 | 0.73 |
| 386.3  | 710   | 287331 | 0.04 | 0.07 | 0.15 | 0.29 | 0.04 | 0.07 | 0.17 | 0.33 | 0.03 | 0.04 | 0.06 | 0.10 | 0.06 | 0.18 | 0.57 | 0.89 |
| 386.9  | 4685  | 287331 | 0.07 | 0.22 | 0.66 | 0.95 | 0.07 | 0.25 | 0.74 | 0.97 | 0.04 | 0.08 | 0.20 | 0.38 | 0.19 | 0.77 | 1.00 | 1.00 |
| 389    | 4810  | 287331 | 0.07 | 0.23 | 0.67 | 0.95 | 0.08 | 0.26 | 0.75 | 0.98 | 0.04 | 0.08 | 0.20 | 0.39 | 0.19 | 0.78 | 1.00 | 1.00 |
| 389.1  | 499   | 287331 | 0.04 | 0.06 | 0.12 | 0.22 | 0.04 | 0.06 | 0.13 | 0.25 | 0.03 | 0.04 | 0.06 | 0.08 | 0.05 | 0.14 | 0.43 | 0.76 |
| 389.2  | 412   | 287331 | 0.03 | 0.05 | 0.11 | 0.19 | 0.04 | 0.06 | 0.12 | 0.21 | 0.03 | 0.04 | 0.05 | 0.07 | 0.05 | 0.13 | 0.37 | 0.68 |
| 389.4  | 539   | 287331 | 0.04 | 0.06 | 0.13 | 0.23 | 0.04 | 0.06 | 0.14 | 0.27 | 0.03 | 0.04 | 0.06 | 0.08 | 0.06 | 0.15 | 0.46 | 0.79 |
| 394    | 5564  | 202269 | 0.07 | 0.25 | 0.73 | 0.97 | 0.08 | 0.29 | 0.80 | 0.99 | 0.04 | 0.09 | 0.22 | 0.43 | 0.22 | 0.84 | 1.00 | 1.00 |
| 394.1  | 680   | 202269 | 0.04 | 0.07 | 0.15 | 0.28 | 0.04 | 0.07 | 0.17 | 0.32 | 0.03 | 0.04 | 0.06 | 0.09 | 0.06 | 0.18 | 0.55 | 0.88 |
| 394.2  | 3323  | 202269 | 0.06 | 0.17 | 0.52 | 0.85 | 0.06 | 0.19 | 0.59 | 0.91 | 0.04 | 0.07 | 0.15 | 0.29 | 0.15 | 0.63 | 1.00 | 1.00 |
| 394.3  | 1453  | 202269 | 0.05 | 0.10 | 0.26 | 0.51 | 0.05 | 0.11 | 0.31 | 0.59 | 0.03 | 0.05 | 0.09 | 0.15 | 0.09 | 0.33 | 0.86 | 1.00 |
| 394.7  | 1335  | 202269 | 0.04 | 0.09 | 0.25 | 0.48 | 0.05 | 0.10 | 0.29 | 0.55 | 0.03 | 0.05 | 0.09 | 0.14 | 0.08 | 0.31 | 0.83 | 0.99 |
| 395    | 6317  | 202269 | 0.08 | 0.28 | 0.78 | 0.98 | 0.09 | 0.32 | 0.85 | 0.99 | 0.04 | 0.09 | 0.25 | 0.48 | 0.24 | 0.88 | 1.00 | 1.00 |
| 395.1  | 3224  | 202269 | 0.06 | 0.17 | 0.51 | 0.84 | 0.06 | 0.19 | 0.58 | 0.90 | 0.04 | 0.07 | 0.15 | 0.28 | 0.14 | 0.61 | 0.99 | 1.00 |
| 395.2  | 2915  | 202269 | 0.06 | 0.15 | 0.47 | 0.80 | 0.06 | 0.18 | 0.54 | 0.87 | 0.04 | 0.06 | 0.14 | 0.26 | 0.13 | 0.57 | 0.99 | 1.00 |
| 395.6  | 1554  | 202269 | 0.05 | 0.10 | 0.28 | 0.54 | 0.05 | 0.11 | 0.32 | 0.62 | 0.03 | 0.05 | 0.09 | 0.16 | 0.09 | 0.35 | 0.88 | 1.00 |
| 396    | 1382  | 202269 | 0.04 | 0.09 | 0.25 | 0.50 | 0.05 | 0.11 | 0.29 | 0.57 | 0.03 | 0.05 | 0.09 | 0.15 | 0.09 | 0.32 | 0.84 | 0.99 |
| 401    | 75408 | 202269 | 0.38 | 0.98 | 1.00 | 1.00 | 0.43 | 0.99 | 1.00 | 1.00 | 0.12 | 0.48 | 0.97 | 1.00 | 0.96 | 1.00 | 1.00 | 1.00 |
| 401.1  | 75160 | 202269 | 0.37 | 0.98 | 1.00 | 1.00 | 0.43 | 0.99 | 1.00 | 1.00 | 0.12 | 0.48 | 0.97 | 1.00 | 0.96 | 1.00 | 1.00 | 1.00 |
| 401.2  | 1667  | 202269 | 0.05 | 0.11 | 0.30 | 0.57 | 0.05 | 0.12 | 0.34 | 0.65 | 0.03 | 0.05 | 0.10 | 0.17 | 0.09 | 0.37 | 0.90 | 1.00 |
| 401.21 | 395   | 202269 | 0.03 | 0.05 | 0.10 | 0.18 | 0.04 | 0.06 | 0.12 | 0.21 | 0.03 | 0.04 | 0.05 | 0.07 | 0.05 | 0.12 | 0.35 | 0.66 |
| 401.22 | 1285  | 202269 | 0.04 | 0.09 | 0.24 | 0.47 | 0.05 | 0.10 | 0.28 | 0.54 | 0.03 | 0.05 | 0.08 | 0.14 | 0.08 | 0.30 | 0.81 | 0.99 |
| 402    | 1464  | 202269 | 0.05 | 0.10 | 0.27 | 0.52 | 0.05 | 0.11 | 0.31 | 0.59 | 0.03 | 0.05 | 0.09 | 0.15 | 0.09 | 0.33 | 0.86 | 1.00 |
| 411    | 30489 | 202269 | 0.21 | 0.81 | 1.00 | 1.00 | 0.24 | 0.88 | 1.00 | 1.00 | 0.08 | 0.26 | 0.75 | 0.98 | 0.74 | 1.00 | 1.00 | 1.00 |
| 411.1  | 4478  | 202269 | 0.07 | 0.21 | 0.64 | 0.94 | 0.07 | 0.24 | 0.72 | 0.97 | 0.04 | 0.08 | 0.19 | 0.37 | 0.18 | 0.75 | 1.00 | 1.00 |
| 411.2  | 12033 | 202269 | 0.11 | 0.46 | 0.96 | 1.00 | 0.13 |      |      |      |      |      |      |      |      |      |      |      |

|        |       |        |      |      |      |      |      |      |      |      |      |      |      |      |      |      |      |      |
|--------|-------|--------|------|------|------|------|------|------|------|------|------|------|------|------|------|------|------|------|
| 411.9  | 1423  | 202269 | 0.04 | 0.10 | 0.26 | 0.51 | 0.05 | 0.11 | 0.30 | 0.58 | 0.03 | 0.05 | 0.09 | 0.15 | 0.09 | 0.32 | 0.85 | 0.99 |
| 414    | 2245  | 202269 | 0.05 | 0.13 | 0.38 | 0.70 | 0.05 | 0.15 | 0.44 | 0.77 | 0.04 | 0.06 | 0.12 | 0.21 | 0.11 | 0.47 | 0.96 | 1.00 |
| 415    | 4937  | 202269 | 0.07 | 0.23 | 0.68 | 0.95 | 0.08 | 0.26 | 0.76 | 0.98 | 0.04 | 0.08 | 0.20 | 0.40 | 0.20 | 0.79 | 1.00 | 1.00 |
| 415.2  | 976   | 202269 | 0.04 | 0.08 | 0.19 | 0.37 | 0.04 | 0.09 | 0.22 | 0.43 | 0.03 | 0.04 | 0.07 | 0.12 | 0.07 | 0.24 | 0.70 | 0.96 |
| 415.21 | 414   | 202269 | 0.03 | 0.05 | 0.11 | 0.19 | 0.04 | 0.06 | 0.11 | 0.12 | 0.03 | 0.04 | 0.05 | 0.07 | 0.05 | 0.13 | 0.37 | 0.68 |
| 416    | 3070  | 202269 | 0.06 | 0.16 | 0.49 | 0.82 | 0.06 | 0.18 | 0.56 | 0.88 | 0.04 | 0.07 | 0.14 | 0.27 | 0.14 | 0.59 | 0.99 | 1.00 |
| 418    | 26417 | 202269 | 0.19 | 0.76 | 1.00 | 1.00 | 0.21 | 0.83 | 1.00 | 1.00 | 0.07 | 0.24 | 0.70 | 0.96 | 0.68 | 1.00 | 1.00 | 1.00 |
| 418.1  | 3619  | 202269 | 0.06 | 0.18 | 0.55 | 0.88 | 0.07 | 0.21 | 0.63 | 0.93 | 0.04 | 0.07 | 0.16 | 0.31 | 0.16 | 0.66 | 1.00 | 1.00 |
| 420    | 2276  | 202269 | 0.05 | 0.13 | 0.38 | 0.70 | 0.06 | 0.15 | 0.44 | 0.78 | 0.04 | 0.06 | 0.12 | 0.21 | 0.11 | 0.47 | 0.97 | 1.00 |
| 420.2  | 1431  | 202269 | 0.04 | 0.10 | 0.26 | 0.51 | 0.05 | 0.10 | 0.30 | 0.58 | 0.03 | 0.11 | 0.05 | 0.09 | 0.15 | 0.09 | 0.32 | 0.85 |
| 420.21 | 209   | 202269 | 0.03 | 0.04 | 0.07 | 0.11 | 0.03 | 0.05 | 0.08 | 0.13 | 0.03 | 0.03 | 0.04 | 0.05 | 0.04 | 0.08 | 0.21 | 0.41 |
| 420.3  | 764   | 202269 | 0.04 | 0.07 | 0.16 | 0.31 | 0.04 | 0.08 | 0.18 | 0.35 | 0.03 | 0.04 | 0.07 | 0.10 | 0.06 | 0.20 | 0.60 | 0.91 |
| 425    | 1363  | 202269 | 0.04 | 0.09 | 0.25 | 0.49 | 0.05 | 0.10 | 0.29 | 0.56 | 0.03 | 0.05 | 0.09 | 0.14 | 0.08 | 0.31 | 0.84 | 0.99 |
| 425.1  | 1307  | 202269 | 0.04 | 0.09 | 0.24 | 0.47 | 0.05 | 0.09 | 0.10 | 0.28 | 0.03 | 0.10 | 0.05 | 0.08 | 0.08 | 0.30 | 0.82 | 0.99 |
| 426    | 7651  | 202269 | 0.09 | 0.32 | 0.85 | 0.99 | 0.10 | 0.38 | 0.91 | 1.00 | 0.05 | 0.10 | 0.29 | 0.55 | 0.28 | 0.93 | 1.00 | 1.00 |
| 426.2  | 2459  | 202269 | 0.05 | 0.14 | 0.41 | 0.74 | 0.06 | 0.15 | 0.47 | 0.81 | 0.04 | 0.06 | 0.12 | 0.22 | 0.12 | 0.50 | 0.98 | 1.00 |
| 426.21 | 1220  | 202269 | 0.04 | 0.09 | 0.23 | 0.45 | 0.05 | 0.10 | 0.27 | 0.52 | 0.03 | 0.05 | 0.08 | 0.13 | 0.08 | 0.28 | 0.79 | 0.99 |
| 426.23 | 508   | 202269 | 0.04 | 0.06 | 0.12 | 0.22 | 0.04 | 0.06 | 0.12 | 0.22 | 0.03 | 0.04 | 0.06 | 0.08 | 0.05 | 0.14 | 0.44 | 0.77 |
| 426.24 | 659   | 202269 | 0.04 | 0.07 | 0.14 | 0.27 | 0.04 | 0.07 | 0.16 | 0.31 | 0.03 | 0.04 | 0.06 | 0.09 | 0.06 | 0.17 | 0.53 | 0.87 |
| 426.3  | 3818  | 202269 | 0.06 | 0.19 | 0.57 | 0.90 | 0.07 | 0.22 | 0.65 | 0.94 | 0.04 | 0.07 | 0.17 | 0.32 | 0.16 | 0.69 | 1.00 | 1.00 |
| 426.31 | 1758  | 202269 | 0.05 | 0.11 | 0.31 | 0.59 | 0.05 | 0.12 | 0.36 | 0.67 | 0.03 | 0.05 | 0.10 | 0.17 | 0.10 | 0.38 | 0.92 | 1.00 |
| 426.32 | 2030  | 202269 | 0.05 | 0.12 | 0.35 | 0.65 | 0.05 | 0.12 | 0.40 | 0.65 | 0.03 | 0.06 | 0.11 | 0.19 | 0.11 | 0.43 | 0.95 | 1.00 |
| 426.4  | 210   | 202269 | 0.03 | 0.04 | 0.07 | 0.12 | 0.03 | 0.05 | 0.08 | 0.13 | 0.03 | 0.03 | 0.04 | 0.05 | 0.04 | 0.08 | 0.21 | 0.41 |
| 426.9  | 2715  | 202269 | 0.06 | 0.15 | 0.44 | 0.78 | 0.06 | 0.17 | 0.51 | 0.84 | 0.04 | 0.06 | 0.13 | 0.24 | 0.13 | 0.54 | 0.99 | 1.00 |
| 426.91 | 2511  | 202269 | 0.05 | 0.14 | 0.42 | 0.74 | 0.06 | 0.16 | 0.48 | 0.82 | 0.04 | 0.06 | 0.13 | 0.23 | 0.12 | 0.51 | 0.98 | 1.00 |
| 427    | 25228 | 202269 | 0.18 | 0.75 | 1.00 | 1.00 | 0.21 | 0.82 | 1.00 | 1.00 | 0.07 | 0.23 | 0.68 | 0.95 | 0.67 | 1.00 | 1.00 | 1.00 |
| 427.1  | 3202  | 202269 | 0.06 | 0.16 | 0.50 | 0.84 | 0.06 | 0.16 | 0.58 | 0.84 | 0.04 | 0.19 | 0.07 | 0.15 | 0.28 | 0.14 | 0.61 | 0.99 |
| 427.11 | 2326  | 202269 | 0.05 | 0.13 | 0.39 | 0.71 | 0.06 | 0.15 | 0.45 | 0.79 | 0.04 | 0.06 | 0.12 | 0.21 | 0.12 | 0.48 | 0.97 | 1.00 |
| 427.12 | 956   | 202269 | 0.04 | 0.08 | 0.19 | 0.37 | 0.04 | 0.09 | 0.22 | 0.43 | 0.03 | 0.04 | 0.07 | 0.11 | 0.07 | 0.23 | 0.69 | 0.96 |
| 427.2  | 15491 | 202269 | 0.13 | 0.56 | 0.99 | 1.00 | 0.15 | 0.63 | 1.00 | 1.00 | 0.06 | 0.16 | 0.50 | 0.83 | 0.48 | 1.00 | 1.00 | 1.00 |
| 427.21 | 983   | 202269 | 0.04 | 0.08 | 0.19 | 0.38 | 0.04 | 0.08 | 0.09 | 0.22 | 0.03 | 0.04 | 0.07 | 0.12 | 0.07 | 0.24 | 0.70 | 0.96 |
| 427.3  | 3400  | 202269 | 0.06 | 0.17 | 0.53 | 0.86 | 0.06 | 0.20 | 0.60 | 0.91 | 0.04 | 0.07 | 0.15 | 0.29 | 0.15 | 0.64 | 1.00 | 1.00 |
| 427.4  | 1324  | 202269 | 0.04 | 0.09 | 0.25 | 0.48 | 0.05 | 0.10 | 0.28 | 0.55 | 0.03 | 0.05 | 0.09 | 0.14 | 0.08 | 0.30 | 0.83 | 0.99 |
| 427.41 | 365   | 202269 | 0.03 | 0.05 | 0.10 | 0.17 | 0.03 | 0.06 | 0.11 | 0.19 | 0.03 | 0.04 | 0.05 | 0.07 | 0.05 | 0.12 | 0.33 | 0.63 |
| 427.42 | 1121  | 202269 | 0.04 | 0.08 | 0.21 | 0.42 | 0.04 | 0.08 | 0.21 | 0.42 | 0.03 | 0.05 | 0.08 | 0.13 | 0.08 | 0.27 | 0.76 | 0.98 |
| 427.5  | 998   | 202269 | 0.04 | 0.08 | 0.20 | 0.38 | 0.04 | 0.09 | 0.23 | 0.44 | 0.03 | 0.04 | 0.07 | 0.12 | 0.07 | 0.24 | 0.71 | 0.97 |
| 427.6  | 837   | 202269 | 0.04 | 0.07 | 0.17 | 0.33 | 0.04 | 0.08 | 0.20 | 0.38 | 0.03 | 0.04 | 0.07 | 0.10 | 0.07 | 0.21 | 0.63 | 0.93 |
| 427.7  | 2398  | 202269 | 0.05 | 0.13 | 0.40 | 0.73 | 0.06 | 0.15 | 0.46 | 0.80 | 0.04 | 0.06 | 0.12 | 0.22 | 0.12 | 0.49 | 0.97 | 1.00 |
| 427.8  | 484   | 202269 | 0.04 | 0.06 | 0.12 | 0.21 | 0.04 | 0.06 | 0.13 | 0.24 | 0.03 | 0.04 | 0.05 | 0.08 | 0.05 | 0.14 | 0.42 | 0.75 |
| 427.9  | 3694  | 202269 | 0.06 | 0.18 | 0.56 | 0.89 | 0.07 | 0.21 | 0.64 | 0.93 | 0.04 | 0.07 | 0.16 | 0.31 | 0.16 | 0.67 | 1.00 | 1.00 |
| 428    | 6185  | 202269 | 0.08 | 0.27 | 0.77 | 0.98 | 0.09 | 0.32 | 0.84 | 0.99 | 0.04 | 0.09 | 0.24 | 0.47 | 0.23 | 0.87 | 1.00 | 1.00 |
| 428.1  | 3650  | 202269 | 0.06 | 0.18 | 0.56 | 0.88 | 0.07 | 0.21 | 0.63 | 0.93 | 0.04 | 0.07 | 0.16 | 0.31 | 0.16 | 0.67 | 1.00 | 1.00 |
| 428.2  | 4914  | 202269 | 0.07 | 0.23 | 0.68 | 0.95 | 0.08 | 0.26 | 0.76 | 0.98 | 0.04 | 0.08 | 0.20 | 0.39 | 0.20 | 0.79 | 1.00 | 1.00 |
| 429    | 756   | 202269 | 0.04 | 0.07 | 0.16 | 0.30 | 0.04 | 0.07 | 0.18 | 0.30 | 0.03 | 0.08 | 0.04 | 0.07 | 0.06 | 0.19 | 0.59 | 0.91 |
| 429.2  | 553   | 202269 | 0.04 | 0.06 | 0.13 | 0.23 | 0.04 | 0.07 | 0.14 | 0.27 | 0.03 | 0.04 | 0.06 | 0.08 | 0.06 | 0.15 | 0.47 | 0.80 |
| 430    | 1984  | 202269 | 0.05 | 0.12 | 0.34 | 0.64 | 0.05 | 0.13 | 0.40 | 0.72 | 0.03 | 0.05 | 0.11 | 0.19 | 0.11 | 0.42 | 0.94 | 1.00 |
| 430.1  | 816   | 202269 | 0.04 | 0.07 | 0.17 | 0.32 | 0.04 | 0.08 | 0.19 | 0.37 | 0.03 | 0.04 | 0.07 | 0.10 | 0.07 | 0.21 | 0.62 | 0.93 |
| 430.2  | 855   | 202269 | 0.04 | 0.07 | 0.17 | 0.34 | 0.04 | 0.07 | 0.17 | 0.34 | 0.03 | 0.08 | 0.04 | 0.07 | 0.11 | 0.07 | 0.21 | 0.64 |
| 430.3  | 308   | 202269 | 0.03 | 0.05 | 0.09 | 0.15 | 0.03 | 0.05 | 0.10 | 0.17 | 0.03 | 0.03 | 0.05 | 0.06 | 0.05 | 0.10 | 0.29 | 0.56 |
| 433    | 9077  | 202269 | 0.10 | 0.37 | 0.90 | 1.00 | 0.11 | 0.43 | 0.95 | 1.00 | 0.05 | 0.11 | 0.33 | 0.62 | 0.32 | 0.96 | 1.00 | 1.00 |
| 433.1  | 1354  | 202269 | 0.04 | 0.09 | 0.25 | 0.49 | 0.05 | 0.10 | 0.29 | 0.56 | 0.03 | 0.05 | 0.09 | 0.14 | 0.08 | 0.31 | 0.83 | 0.99 |
| 433.12 | 270   | 202269 | 0.03 | 0.05 | 0.08 | 0.14 | 0.03 | 0.05 | 0.08 | 0.14 | 0.03 | 0.03 | 0.05 | 0.06 | 0.04 | 0.10 | 0.26 | 0.50 |
| 433.2  | 4355  | 202269 | 0.07 | 0.21 | 0.63 | 0.93 | 0.07 | 0.24 | 0.71 | 0.96 | 0.04 | 0.08 | 0.18 | 0.36 | 0.18 | 0.74 | 1.00 | 1.00 |
| 433.21 | 4193  | 202269 | 0.07 | 0.20 | 0.61 | 0.92 | 0.07 | 0.23 | 0.69 | 0.96 | 0.04 | 0.08 | 0.18 | 0.35 | 0.17 | 0.73 | 1.00 | 1.00 |
| 433.3  | 3089  | 202269 | 0.06 | 0.16 | 0.49 | 0.83 | 0.06 | 0.18 | 0.56 | 0.89 | 0.04 | 0.07 | 0.14 | 0.27 | 0.14 | 0.60 | 0.99 | 1.00 |
| 433.31 | 2115  | 202269 | 0.05 | 0.12 | 0.36 | 0.67 | 0.05 | 0.14 | 0.42 | 0.75 | 0.04 | 0.06 | 0.11 | 0.20 | 0.11 | 0.45 | 0.95 | 1.00 |
| 433.5  | 364   | 202269 | 0.03 | 0.05 | 0.10 | 0.17 | 0.03 | 0.06 | 0.11 | 0.17 | 0.03 | 0.06 | 0.04 | 0.05 | 0.07 | 0.12 | 0.33 | 0.63 |
| 433.8  | 1333  | 202269 | 0.04 | 0.09 | 0.25 | 0.48 | 0.05 | 0.10 | 0.29 | 0.55 | 0.03 | 0.05 | 0.09 | 0.14 | 0.08 | 0.31 | 0.83 | 0.99 |
| 440    | 1453  | 202269 | 0.05 | 0.10 | 0.26 | 0.51 | 0.05 | 0.11 | 0.31 | 0.59 | 0.03 | 0.05 | 0.09 | 0.15 | 0.09 | 0.33 | 0.86 | 1.00 |
| 440.2  | 848   | 202269 | 0.04 | 0.07 | 0.17 | 0.33 | 0.04 | 0.08 | 0.20 | 0.39 | 0.03 | 0.04 | 0.07 | 0.11 | 0.07 | 0.21 | 0.64 | 0.94 |
| 440.9  | 331   | 202269 | 0.03 | 0.05 | 0.09 | 0.16 | 0.03 | 0.05 | 0.10 | 0.18 | 0.03 | 0.03 | 0.05 | 0.06 | 0.05 | 0.11 | 0.31 | 0.59 |
| 441    | 701   | 202269 | 0.04 | 0.07 | 0.15 | 0.28 | 0.04 | 0.07 | 0.17 | 0.33 | 0.03 | 0.04 | 0.06 | 0.09 | 0.06 | 0.18 | 0.56 | 0.89 |
| 441.1  | 321   | 202269 | 0.03 | 0.05 | 0.09 | 0.15 | 0.03 | 0.05 | 0.10 | 0.18 | 0.03 | 0.03 | 0.05 | 0.06 | 0.05 | 0.11 | 0.30 | 0.57 |
| 442    | 2079  | 202269 | 0.05 | 0.12 | 0.36 | 0.66 | 0.05 | 0.14 | 0.41 | 0.74 | 0.03 | 0.06 | 0.11 | 0.20 | 0.11 | 0.44 | 0.95 | 1.00 |
| 442.1  | 1632  | 202269 | 0.05 | 0.10 | 0.29 | 0.56 | 0.05 | 0.10 | 0.34 | 0.64 | 0.03 | 0.05 | 0.10 | 0.16 | 0.09 | 0.36 | 0.89 | 1.00 |
| 442.11 | 1047  | 202269 | 0.04 | 0.08 | 0.20 | 0.40 | 0.04 | 0.09 | 0.23 | 0.46 | 0.03 | 0.04 | 0.08 | 0.12 | 0.07 | 0.25 | 0.73 | 0.97 |
| 442.8  | 218   | 202269 | 0.03 | 0.04 | 0.07 | 0.12 | 0.03 | 0.05 | 0.08 | 0.13 | 0.03 | 0.03 | 0.04 | 0.05 | 0.04 | 0.09 | 0.22 | 0.42 |
| 443    | 4031  | 202269 | 0.06 | 0.20 | 0.60 | 0.91 | 0.07 | 0.22 | 0.67 | 0.95 | 0.04 | 0.07 | 0.17 | 0.34 | 0.17 | 0.71 | 1.00 | 1.00 |
| 443.1  | 1162  | 202269 | 0.04 | 0.09 | 0.22 | 0.43 | 0.04 | 0.10 | 0.26 | 0.50 | 0.03 | 0.05 | 0.08 | 0.13 | 0.08 | 0.27 | 0.77 | 0.98 |
| 443.7  | 397   | 202269 | 0.   |      |      |      |      |      |      |      |      |      |      |      |      |      |      |      |

|        |       |        |      |      |      |      |      |      |        |      |      |      |      |      |      |      |      |      |
|--------|-------|--------|------|------|------|------|------|------|--------|------|------|------|------|------|------|------|------|------|
| 446.5  | 417   | 202269 | 0.03 | 0.05 | 0.11 | 0.19 | 0.04 | 0.06 | 0.12   | 0.22 | 0.03 | 0.04 | 0.05 | 0.07 | 0.05 | 0.13 | 0.37 | 0.69 |
| 446.9  | 258   | 202269 | 0.03 | 0.05 | 0.08 | 0.13 | 0.03 | 0.05 | 0.09   | 0.15 | 0.03 | 0.03 | 0.04 | 0.06 | 0.04 | 0.09 | 0.25 | 0.48 |
| 447    | 1320  | 202269 | 0.04 | 0.09 | 0.24 | 0.48 | 0.05 | 0.10 | 0.28   | 0.55 | 0.03 | 0.05 | 0.09 | 0.14 | 0.08 | 0.30 | 0.82 | 0.99 |
| 447.1  | 858   | 202269 | 0.04 | 0.07 | 0.17 | 0.34 | 0.04 | 0.08 | 0.20   | 0.39 | 0.03 | 0.04 | 0.07 | 0.11 | 0.07 | 0.21 | 0.65 | 0.94 |
| 450    | 805   | 202269 | 0.04 | 0.07 | 0.17 | 0.32 | 0.04 | 0.08 | 0.17   | 0.32 | 0.03 | 0.04 | 0.07 | 0.10 | 0.07 | 0.20 | 0.62 | 0.92 |
| 451    | 3916  | 202269 | 0.06 | 0.19 | 0.58 | 0.90 | 0.07 | 0.22 | 0.66   | 0.95 | 0.04 | 0.07 | 0.17 | 0.33 | 0.17 | 0.70 | 1.00 | 1.00 |
| 451.2  | 3612  | 202269 | 0.06 | 0.18 | 0.55 | 0.88 | 0.07 | 0.21 | 0.63   | 0.93 | 0.04 | 0.07 | 0.16 | 0.31 | 0.16 | 0.66 | 1.00 | 1.00 |
| 452    | 598   | 202269 | 0.04 | 0.06 | 0.13 | 0.25 | 0.04 | 0.07 | 0.15   | 0.29 | 0.03 | 0.04 | 0.06 | 0.09 | 0.06 | 0.16 | 0.50 | 0.83 |
| 454    | 10793 | 202269 | 0.11 | 0.43 | 0.94 | 1.00 | 0.12 | 0.49 | 0.97   | 1.00 | 0.05 | 0.13 | 0.38 | 0.70 | 0.37 | 0.98 | 1.00 | 1.00 |
| 454.1  | 10333 | 202269 | 0.10 | 0.41 | 0.94 | 1.00 | 0.11 | 0.48 | 0.97   | 1.00 | 0.05 | 0.12 | 0.36 | 0.68 | 0.35 | 0.98 | 1.00 | 1.00 |
| 454.11 | 716   | 202269 | 0.04 | 0.07 | 0.15 | 0.29 | 0.04 | 0.07 | 0.17   | 0.34 | 0.03 | 0.04 | 0.06 | 0.10 | 0.06 | 0.19 | 0.57 | 0.89 |
| 455    | 23176 | 202269 | 0.17 | 0.71 | 1.00 | 1.00 | 0.20 | 0.79 | 1.00   | 1.00 | 0.07 | 0.22 | 0.65 | 0.94 | 0.63 | 1.00 | 1.00 | 1.00 |
| 456    | 224   | 202269 | 0.03 | 0.04 | 0.08 | 0.12 | 0.03 | 0.05 | 0.08   | 0.14 | 0.03 | 0.03 | 0.04 | 0.06 | 0.04 | 0.09 | 0.22 | 0.43 |
| 458    | 6659  | 202269 | 0.08 | 0.29 | 0.80 | 0.99 | 0.09 | 0.34 | 0.87   | 1.00 | 0.04 | 0.10 | 0.26 | 0.50 | 0.25 | 0.89 | 1.00 | 1.00 |
| 458.1  | 1622  | 202269 | 0.05 | 0.10 | 0.29 | 0.56 | 0.05 | 0.12 | 0.34   | 0.63 | 0.03 | 0.05 | 0.10 | 0.16 | 0.09 | 0.36 | 0.89 | 1.00 |
| 458.2  | 250   | 202269 | 0.03 | 0.05 | 0.08 | 0.13 | 0.03 | 0.05 | 0.09   | 0.15 | 0.03 | 0.03 | 0.04 | 0.06 | 0.04 | 0.09 | 0.24 | 0.47 |
| 458.9  | 4073  | 202269 | 0.06 | 0.20 | 0.60 | 0.91 | 0.07 | 0.23 | 0.68   | 0.95 | 0.04 | 0.07 | 0.18 | 0.34 | 0.17 | 0.71 | 1.00 | 1.00 |
| 459    | 17142 | 202269 | 0.14 | 0.60 | 0.99 | 1.00 | 0.16 | 0.67 | 1.00   | 1.00 | 0.06 | 0.17 | 0.53 | 0.87 | 0.52 | 1.00 | 1.00 | 1.00 |
| 459.9  | 16931 | 202269 | 0.14 | 0.59 | 0.99 | 1.00 | 0.16 | 0.67 | 1.00   | 1.00 | 0.06 | 0.17 | 0.53 | 0.86 | 0.51 | 1.00 | 1.00 | 1.00 |
| 465    | 2223  | 269389 | 0.05 | 0.13 | 0.38 | 0.69 | 0.05 | 0.14 | 0.44   | 0.77 | 0.04 | 0.06 | 0.12 | 0.21 | 0.11 | 0.47 | 0.96 | 1.00 |
| 465.2  | 841   | 269389 | 0.04 | 0.07 | 0.17 | 0.33 | 0.04 | 0.08 | 0.20   | 0.38 | 0.03 | 0.04 | 0.07 | 0.11 | 0.07 | 0.21 | 0.64 | 0.93 |
| 470    | 4226  | 269389 | 0.07 | 0.20 | 0.62 | 0.92 | 0.07 | 0.23 | 0.69   | 0.96 | 0.04 | 0.08 | 0.18 | 0.35 | 0.18 | 0.73 | 1.00 | 1.00 |
| 471    | 2933  | 269389 | 0.06 | 0.15 | 0.47 | 0.81 | 0.06 | 0.18 | 0.54   | 0.87 | 0.04 | 0.06 | 0.14 | 0.26 | 0.14 | 0.58 | 0.99 | 1.00 |
| 472    | 906   | 269389 | 0.04 | 0.08 | 0.18 | 0.35 | 0.04 | 0.08 | 0.21   | 0.41 | 0.03 | 0.04 | 0.07 | 0.11 | 0.07 | 0.22 | 0.67 | 0.95 |
| 473    | 2414  | 269389 | 0.05 | 0.14 | 0.40 | 0.73 | 0.06 | 0.15 | 0.47   | 0.80 | 0.04 | 0.06 | 0.12 | 0.22 | 0.12 | 0.50 | 0.97 | 1.00 |
| 473.3  | 263   | 269389 | 0.03 | 0.05 | 0.08 | 0.13 | 0.03 | 0.05 | 0.09   | 0.15 | 0.03 | 0.03 | 0.04 | 0.06 | 0.04 | 0.09 | 0.25 | 0.49 |
| 473.4  | 972   | 269389 | 0.04 | 0.08 | 0.19 | 0.37 | 0.04 | 0.09 | 0.22   | 0.37 | 0.03 | 0.04 | 0.07 | 0.11 | 0.07 | 0.24 | 0.70 | 0.96 |
| 474    | 1762  | 269389 | 0.05 | 0.11 | 0.31 | 0.59 | 0.05 | 0.12 | 0.36   | 0.67 | 0.03 | 0.05 | 0.10 | 0.17 | 0.10 | 0.39 | 0.92 | 1.00 |
| 474.1  | 552   | 269389 | 0.04 | 0.06 | 0.13 | 0.23 | 0.04 | 0.07 | 0.14   | 0.27 | 0.03 | 0.04 | 0.06 | 0.08 | 0.06 | 0.15 | 0.47 | 0.80 |
| 474.2  | 971   | 269389 | 0.04 | 0.08 | 0.19 | 0.37 | 0.04 | 0.09 | 0.22   | 0.43 | 0.03 | 0.04 | 0.07 | 0.11 | 0.07 | 0.24 | 0.70 | 0.96 |
| 475    | 2395  | 269389 | 0.05 | 0.13 | 0.40 | 0.73 | 0.06 | 0.15 | 0.46   | 0.80 | 0.04 | 0.06 | 0.12 | 0.22 | 0.12 | 0.49 | 0.97 | 1.00 |
| 476    | 1225  | 269389 | 0.04 | 0.09 | 0.23 | 0.45 | 0.05 | 0.10 | 0.27   | 0.52 | 0.03 | 0.05 | 0.08 | 0.13 | 0.08 | 0.29 | 0.80 | 0.99 |
| 477    | 2412  | 269389 | 0.05 | 0.13 | 0.40 | 0.73 | 0.06 | 0.15 | 0.46   | 0.80 | 0.04 | 0.06 | 0.12 | 0.22 | 0.12 | 0.50 | 0.97 | 1.00 |
| 478    | 338   | 269389 | 0.03 | 0.05 | 0.09 | 0.16 | 0.03 | 0.05 | 0.10   | 0.18 | 0.03 | 0.04 | 0.05 | 0.07 | 0.05 | 0.11 | 0.31 | 0.59 |
| 479    | 3786  | 269389 | 0.06 | 0.19 | 0.57 | 0.89 | 0.07 | 0.21 | 0.65   | 0.94 | 0.04 | 0.07 | 0.17 | 0.32 | 0.16 | 0.68 | 1.00 | 1.00 |
| 480    | 11693 | 269389 | 0.11 | 0.46 | 0.96 | 1.00 | 0.13 | 0.53 | 0.98   | 1.00 | 0.05 | 0.14 | 0.41 | 0.73 | 0.39 | 0.99 | 1.00 | 1.00 |
| 480.1  | 7555  | 269389 | 0.09 | 0.32 | 0.85 | 0.99 | 0.10 | 0.37 | 0.91   | 1.00 | 0.05 | 0.10 | 0.29 | 0.55 | 0.28 | 0.93 | 1.00 | 1.00 |
| 480.11 | 6741  | 269389 | 0.08 | 0.29 | 0.81 | 0.99 | 0.09 | 0.34 | 0.87   | 1.00 | 0.04 | 0.10 | 0.26 | 0.51 | 0.25 | 0.90 | 1.00 | 1.00 |
| 480.5  | 894   | 269389 | 0.04 | 0.08 | 0.18 | 0.35 | 0.04 | 0.08 | 0.21   | 0.40 | 0.03 | 0.04 | 0.07 | 0.11 | 0.07 | 0.22 | 0.66 | 0.95 |
| 481    | 418   | 269389 | 0.03 | 0.05 | 0.11 | 0.19 | 0.04 | 0.06 | 0.12   | 0.22 | 0.03 | 0.04 | 0.05 | 0.07 | 0.05 | 0.13 | 0.37 | 0.69 |
| 483    | 227   | 269389 | 0.03 | 0.04 | 0.08 | 0.12 | 0.03 | 0.05 | 0.08   | 0.14 | 0.03 | 0.03 | 0.04 | 0.06 | 0.04 | 0.09 | 0.22 | 0.44 |
| 495    | 24896 | 269389 | 0.18 | 0.75 | 1.00 | 1.00 | 0.21 | 0.82 | 1.00   | 1.00 | 0.07 | 0.23 | 0.69 | 0.96 | 0.67 | 1.00 | 1.00 | 1.00 |
| 495.2  | 229   | 269389 | 0.03 | 0.05 | 0.08 | 0.12 | 0.03 | 0.05 | 0.08   | 0.14 | 0.03 | 0.03 | 0.04 | 0.06 | 0.04 | 0.09 | 0.23 | 0.44 |
| 496    | 11361 | 269389 | 0.11 | 0.45 | 0.96 | 1.00 | 0.12 | 0.52 | 0.98   | 1.00 | 0.05 | 0.13 | 0.40 | 0.72 | 0.38 | 0.99 | 1.00 | 1.00 |
| 496.1  | 1937  | 269389 | 0.05 | 0.12 | 0.34 | 0.64 | 0.05 | 0.13 | 0.39   | 0.71 | 0.03 | 0.05 | 0.11 | 0.19 | 0.10 | 0.42 | 0.94 | 1.00 |
| 496.2  | 3258  | 269389 | 0.06 | 0.17 | 0.51 | 0.85 | 0.06 | 0.19 | 0.58   | 0.90 | 0.04 | 0.07 | 0.15 | 0.28 | 0.15 | 0.62 | 0.99 | 1.00 |
| 496.21 | 2997  | 269389 | 0.06 | 0.16 | 0.48 | 0.82 | 0.06 | 0.18 | 0.55   | 0.88 | 0.04 | 0.06 | 0.14 | 0.26 | 0.14 | 0.58 | 0.99 | 1.00 |
| 496.3  | 2143  | 269389 | 0.05 | 0.12 | 0.37 | 0.68 | 0.05 | 0.14 | 0.42   | 0.75 | 0.04 | 0.06 | 0.11 | 0.20 | 0.11 | 0.45 | 0.96 | 1.00 |
| 497    | 647   | 269389 | 0.04 | 0.06 | 0.14 | 0.27 | 0.04 | 0.07 | 0.16   | 0.31 | 0.03 | 0.04 | 0.06 | 0.09 | 0.06 | 0.17 | 0.53 | 0.86 |
| 500    | 459   | 269389 | 0.04 | 0.06 | 0.11 | 0.20 | 0.04 | 0.06 | 0.13   | 0.23 | 0.03 | 0.04 | 0.05 | 0.08 | 0.05 | 0.13 | 0.40 | 0.73 |
| 500.2  | 273   | 269389 | 0.03 | 0.05 | 0.08 | 0.14 | 0.03 | 0.05 | 0.09   | 0.16 | 0.03 | 0.03 | 0.05 | 0.06 | 0.04 | 0.10 | 0.26 | 0.51 |
| 501    | 852   | 269389 | 0.04 | 0.07 | 0.17 | 0.33 | 0.04 | 0.08 | 0.20   | 0.39 | 0.03 | 0.04 | 0.07 | 0.11 | 0.07 | 0.21 | 0.64 | 0.94 |
| 502    | 1036  | 269389 | 0.04 | 0.08 | 0.20 | 0.39 | 0.04 | 0.09 | 0.23   | 0.45 | 0.03 | 0.04 | 0.08 | 0.12 | 0.07 | 0.25 | 0.73 | 0.97 |
| 503    | 534   | 269389 | 0.04 | 0.06 | 0.12 | 0.23 | 0.04 | 0.06 | 0.14   | 0.26 | 0.03 | 0.04 | 0.06 | 0.08 | 0.06 | 0.15 | 0.45 | 0.79 |
| 504    | 389   | 269389 | 0.03 | 0.05 | 0.10 | 0.18 | 0.04 | 0.06 | 0.11   | 0.20 | 0.03 | 0.04 | 0.05 | 0.07 | 0.05 | 0.12 | 0.35 | 0.66 |
| 506    | 1207  | 269389 | 0.04 | 0.09 | 0.23 | 0.45 | 0.05 | 0.10 | 0.26   | 0.51 | 0.03 | 0.05 | 0.08 | 0.13 | 0.08 | 0.28 | 0.79 | 0.99 |
| 507    | 6979  | 269389 | 0.08 | 0.30 | 0.82 | 0.99 | 0.09 | 0.35 | 0.88   | 1.00 | 0.05 | 0.10 | 0.27 | 0.52 | 0.26 | 0.91 | 1.00 | 1.00 |
| 508    | 2447  | 269389 | 0.05 | 0.14 | 0.41 | 0.74 | 0.06 | 0.15 | 0.47   | 0.81 | 0.04 | 0.06 | 0.12 | 0.22 | 0.12 | 0.50 | 0.98 | 1.00 |
| 509    | 3054  | 269389 | 0.06 | 0.16 | 0.49 | 0.82 | 0.06 | 0.18 | 0.56   | 0.88 | 0.04 | 0.07 | 0.14 | 0.27 | 0.14 | 0.59 | 0.99 | 1.00 |
| 509.1  | 2479  | 269389 | 0.05 | 0.14 | 0.41 | 0.74 | 0.06 | 0.16 | 0.48   | 0.81 | 0.04 | 0.06 | 0.12 | 0.23 | 0.12 | 0.51 | 0.98 | 1.00 |
| 509.2  | 2205  | 269389 | 0.05 | 0.13 | 0.37 | 0.69 | 0.05 | 0.14 | 0.43   | 0.77 | 0.04 | 0.06 | 0.12 | 0.21 | 0.11 | 0.46 | 0.96 | 1.00 |
| 509.8  | 444   | 269389 | 0.03 | 0.06 | 0.11 | 0.20 | 0.04 | 0.06 | 0.12   | 0.23 | 0.03 | 0.04 | 0.05 | 0.07 | 0.05 | 0.13 | 0.39 | 0.71 |
| 510    | 1171  | 269389 | 0.04 | 0.09 | 0.22 | 0.43 | 0.04 | 0.10 | 0.26   | 0.50 | 0.03 | 0.05 | 0.08 | 0.13 | 0.08 | 0.28 | 0.78 | 0.98 |
| 512    | 9349  | 269389 | 0.10 | 0.38 | 0.91 | 1.00 | 0.11 | 0.44 | 0.95   | 1.00 | 0.05 | 0.12 | 0.34 | 0.64 | 0.33 | 0.97 | 1.00 | 1.00 |
| 512.1  | 268   | 269389 | 0.03 | 0.05 | 0.08 | 0.14 | 0.03 | 0.05 | 0.09   | 0.15 | 0.03 | 0.03 | 0.05 | 0.06 | 0.04 | 0.10 | 0.26 | 0.50 |
| 512.2  | 203   | 269389 | 0.03 | 0.04 | 0.07 | 0.11 | 0.03 | 0.05 | 0.08   | 0.13 | 0.03 | 0.03 | 0.04 | 0.05 | 0.04 | 0.08 | 0.21 | 0.40 |
| 512.7  | 6109  | 269389 | 0.08 | 0.27 | 0.77 | 0.98 | 0.09 | 0.32 | 0.84   | 0.99 | 0.04 | 0.09 | 0.24 | 0.47 | 0.23 | 0.87 | 1.00 | 1.00 |
| 512.8  | 2986  | 269389 | 0.06 | 0.16 | 0.48 | 0.82 | 0.06 | 0.18 | 0.55   | 0.88 | 0.04 | 0.06 | 0.14 | 0.26 | 0.14 | 0.58 | 0.99 | 1.00 |
| 512.9  | 884   | 269389 | 0.04 | 0.07 | 0.18 | 0.34 | 0.04 | 0.08 | 0.21   | 0.40 | 0.03 | 0.04 | 0.07 | 0.11 | 0.07 | 0.22 | 0.66 | 0.94 |
| 513    | 603   | 269389 | 0.04 | 0.06 | 0.14 | 0.25 | 0.04 | 0.07 | 0.15</ |      |      |      |      |      |      |      |      |      |

|        |       |        |      |      |      |      |      |      |      |      |      |      |      |      |      |      |      |      |
|--------|-------|--------|------|------|------|------|------|------|------|------|------|------|------|------|------|------|------|------|
| 519    | 9890  | 269389 | 0.10 | 0.40 | 0.93 | 1.00 | 0.11 | 0.46 | 0.96 | 1.00 | 0.05 | 0.12 | 0.36 | 0.66 | 0.34 | 0.97 | 1.00 | 1.00 |
| 519.2  | 323   | 269389 | 0.03 | 0.05 | 0.09 | 0.15 | 0.03 | 0.05 | 0.10 | 0.18 | 0.03 | 0.03 | 0.05 | 0.06 | 0.05 | 0.11 | 0.30 | 0.58 |
| 519.8  | 9307  | 269389 | 0.10 | 0.38 | 0.91 | 1.00 | 0.11 | 0.44 | 0.95 | 1.00 | 0.05 | 0.12 | 0.34 | 0.64 | 0.33 | 0.97 | 1.00 | 1.00 |
| 519.9  | 272   | 269389 | 0.03 | 0.05 | 0.08 | 0.14 | 0.03 | 0.05 | 0.09 | 0.16 | 0.03 | 0.03 | 0.05 | 0.06 | 0.04 | 0.10 | 0.26 | 0.51 |
| 520    | 2122  | 191014 | 0.05 | 0.12 | 0.36 | 0.67 | 0.05 | 0.12 | 0.36 | 0.42 | 0.04 | 0.06 | 0.11 | 0.20 | 0.11 | 0.45 | 0.96 | 1.00 |
| 520.2  | 2041  | 191014 | 0.05 | 0.12 | 0.35 | 0.66 | 0.05 | 0.14 | 0.41 | 0.73 | 0.03 | 0.06 | 0.11 | 0.19 | 0.11 | 0.43 | 0.95 | 1.00 |
| 521    | 3012  | 191014 | 0.06 | 0.16 | 0.48 | 0.82 | 0.06 | 0.18 | 0.55 | 0.88 | 0.04 | 0.06 | 0.14 | 0.26 | 0.14 | 0.58 | 0.99 | 1.00 |
| 521.1  | 2952  | 191014 | 0.06 | 0.16 | 0.47 | 0.81 | 0.06 | 0.18 | 0.54 | 0.87 | 0.04 | 0.06 | 0.14 | 0.26 | 0.14 | 0.58 | 0.99 | 1.00 |
| 522    | 1661  | 191014 | 0.05 | 0.11 | 0.30 | 0.57 | 0.05 | 0.11 | 0.34 | 0.57 | 0.03 | 0.05 | 0.10 | 0.17 | 0.09 | 0.37 | 0.90 | 1.00 |
| 522.5  | 1117  | 191014 | 0.04 | 0.08 | 0.21 | 0.42 | 0.04 | 0.08 | 0.25 | 0.42 | 0.03 | 0.05 | 0.08 | 0.13 | 0.08 | 0.26 | 0.76 | 0.98 |
| 523    | 1638  | 191014 | 0.05 | 0.10 | 0.29 | 0.56 | 0.05 | 0.12 | 0.34 | 0.64 | 0.03 | 0.05 | 0.10 | 0.16 | 0.09 | 0.36 | 0.90 | 1.00 |
| 523.3  | 1133  | 191014 | 0.04 | 0.09 | 0.22 | 0.42 | 0.04 | 0.09 | 0.25 | 0.49 | 0.03 | 0.05 | 0.08 | 0.13 | 0.08 | 0.27 | 0.76 | 0.98 |
| 523.32 | 1000  | 191014 | 0.04 | 0.08 | 0.20 | 0.38 | 0.04 | 0.09 | 0.23 | 0.44 | 0.03 | 0.04 | 0.07 | 0.12 | 0.07 | 0.24 | 0.71 | 0.97 |
| 524    | 309   | 191014 | 0.03 | 0.05 | 0.09 | 0.15 | 0.03 | 0.05 | 0.10 | 0.15 | 0.03 | 0.03 | 0.04 | 0.05 | 0.05 | 0.10 | 0.29 | 0.56 |
| 524.3  | 276   | 191014 | 0.03 | 0.05 | 0.08 | 0.14 | 0.03 | 0.05 | 0.09 | 0.16 | 0.03 | 0.03 | 0.05 | 0.06 | 0.05 | 0.10 | 0.26 | 0.51 |
| 525    | 2546  | 191014 | 0.05 | 0.14 | 0.42 | 0.75 | 0.06 | 0.16 | 0.48 | 0.82 | 0.04 | 0.06 | 0.13 | 0.23 | 0.12 | 0.52 | 0.98 | 1.00 |
| 526    | 909   | 191014 | 0.04 | 0.08 | 0.18 | 0.35 | 0.04 | 0.08 | 0.21 | 0.41 | 0.03 | 0.04 | 0.07 | 0.11 | 0.07 | 0.22 | 0.67 | 0.95 |
| 526.1  | 312   | 191014 | 0.03 | 0.05 | 0.09 | 0.15 | 0.03 | 0.05 | 0.10 | 0.15 | 0.03 | 0.03 | 0.05 | 0.06 | 0.05 | 0.10 | 0.29 | 0.56 |
| 526.4  | 229   | 191014 | 0.03 | 0.05 | 0.08 | 0.12 | 0.03 | 0.05 | 0.08 | 0.14 | 0.03 | 0.03 | 0.04 | 0.06 | 0.04 | 0.09 | 0.23 | 0.44 |
| 526.41 | 222   | 191014 | 0.03 | 0.04 | 0.08 | 0.12 | 0.03 | 0.05 | 0.08 | 0.13 | 0.03 | 0.03 | 0.04 | 0.06 | 0.04 | 0.09 | 0.22 | 0.43 |
| 526.9  | 220   | 191014 | 0.03 | 0.04 | 0.07 | 0.12 | 0.03 | 0.05 | 0.08 | 0.13 | 0.03 | 0.03 | 0.04 | 0.06 | 0.04 | 0.09 | 0.22 | 0.43 |
| 527    | 663   | 191014 | 0.04 | 0.07 | 0.14 | 0.27 | 0.04 | 0.07 | 0.16 | 0.27 | 0.03 | 0.04 | 0.06 | 0.09 | 0.06 | 0.18 | 0.54 | 0.87 |
| 527.2  | 340   | 191014 | 0.03 | 0.05 | 0.09 | 0.16 | 0.03 | 0.05 | 0.10 | 0.18 | 0.03 | 0.04 | 0.05 | 0.07 | 0.05 | 0.11 | 0.31 | 0.60 |
| 528    | 3788  | 191014 | 0.06 | 0.19 | 0.57 | 0.89 | 0.07 | 0.21 | 0.65 | 0.94 | 0.04 | 0.07 | 0.17 | 0.32 | 0.16 | 0.68 | 1.00 | 1.00 |
| 528.1  | 475   | 191014 | 0.04 | 0.06 | 0.12 | 0.21 | 0.04 | 0.06 | 0.13 | 0.24 | 0.03 | 0.04 | 0.05 | 0.08 | 0.05 | 0.14 | 0.41 | 0.74 |
| 528.11 | 406   | 191014 | 0.03 | 0.05 | 0.10 | 0.18 | 0.04 | 0.06 | 0.12 | 0.21 | 0.03 | 0.04 | 0.05 | 0.07 | 0.05 | 0.12 | 0.36 | 0.67 |
| 528.5  | 644   | 191014 | 0.04 | 0.06 | 0.14 | 0.26 | 0.04 | 0.07 | 0.16 | 0.26 | 0.03 | 0.04 | 0.06 | 0.09 | 0.06 | 0.17 | 0.52 | 0.86 |
| 528.6  | 298   | 191014 | 0.03 | 0.05 | 0.09 | 0.15 | 0.03 | 0.05 | 0.10 | 0.17 | 0.03 | 0.03 | 0.05 | 0.06 | 0.05 | 0.10 | 0.28 | 0.54 |
| 528.7  | 289   | 191014 | 0.03 | 0.05 | 0.09 | 0.14 | 0.03 | 0.05 | 0.10 | 0.16 | 0.03 | 0.03 | 0.05 | 0.06 | 0.05 | 0.10 | 0.27 | 0.53 |
| 529    | 1210  | 191014 | 0.04 | 0.09 | 0.23 | 0.45 | 0.05 | 0.10 | 0.26 | 0.51 | 0.03 | 0.05 | 0.08 | 0.13 | 0.08 | 0.28 | 0.79 | 0.99 |
| 529.1  | 290   | 191014 | 0.03 | 0.05 | 0.09 | 0.14 | 0.03 | 0.05 | 0.10 | 0.16 | 0.03 | 0.03 | 0.05 | 0.06 | 0.05 | 0.10 | 0.27 | 0.53 |
| 530    | 34889 | 191014 | 0.22 | 0.85 | 1.00 | 1.00 | 0.26 | 0.91 | 1.00 | 1.00 | 0.08 | 0.29 | 0.80 | 0.99 | 0.78 | 1.00 | 1.00 | 1.00 |
| 530.1  | 32569 | 191014 | 0.21 | 0.83 | 1.00 | 1.00 | 0.25 | 0.89 | 1.00 | 1.00 | 0.08 | 0.27 | 0.77 | 0.98 | 0.76 | 1.00 | 1.00 | 1.00 |
| 530.11 | 15750 | 191014 | 0.13 | 0.56 | 0.99 | 1.00 | 0.15 | 0.64 | 1.00 | 1.00 | 0.06 | 0.16 | 0.50 | 0.84 | 0.49 | 1.00 | 1.00 | 1.00 |
| 530.12 | 4731  | 191014 | 0.07 | 0.22 | 0.66 | 0.95 | 0.07 | 0.25 | 0.74 | 0.97 | 0.04 | 0.08 | 0.20 | 0.38 | 0.19 | 0.77 | 1.00 | 1.00 |
| 530.13 | 3105  | 191014 | 0.06 | 0.16 | 0.49 | 0.83 | 0.06 | 0.18 | 0.56 | 0.89 | 0.04 | 0.07 | 0.14 | 0.27 | 0.14 | 0.60 | 0.99 | 1.00 |
| 530.14 | 10069 | 191014 | 0.10 | 0.40 | 0.93 | 1.00 | 0.11 | 0.47 | 0.96 | 1.00 | 0.05 | 0.12 | 0.36 | 0.67 | 0.35 | 0.97 | 1.00 | 1.00 |
| 530.2  | 1770  | 191014 | 0.05 | 0.11 | 0.31 | 0.60 | 0.05 | 0.12 | 0.36 | 0.67 | 0.03 | 0.05 | 0.10 | 0.17 | 0.10 | 0.39 | 0.92 | 1.00 |
| 530.3  | 1940  | 191014 | 0.05 | 0.12 | 0.34 | 0.63 | 0.05 | 0.13 | 0.39 | 0.71 | 0.03 | 0.05 | 0.11 | 0.19 | 0.10 | 0.42 | 0.94 | 1.00 |
| 530.5  | 637   | 191014 | 0.04 | 0.06 | 0.14 | 0.26 | 0.04 | 0.07 | 0.16 | 0.30 | 0.03 | 0.04 | 0.06 | 0.09 | 0.06 | 0.17 | 0.52 | 0.85 |
| 530.7  | 303   | 191014 | 0.03 | 0.05 | 0.09 | 0.15 | 0.03 | 0.05 | 0.10 | 0.17 | 0.03 | 0.03 | 0.05 | 0.06 | 0.05 | 0.10 | 0.28 | 0.55 |
| 530.9  | 2010  | 191014 | 0.05 | 0.12 | 0.35 | 0.65 | 0.05 | 0.13 | 0.40 | 0.73 | 0.03 | 0.06 | 0.11 | 0.19 | 0.11 | 0.43 | 0.95 | 1.00 |
| 531    | 7143  | 191014 | 0.08 | 0.31 | 0.83 | 0.99 | 0.09 | 0.36 | 0.89 | 0.99 | 0.05 | 0.10 | 0.27 | 0.53 | 0.26 | 0.91 | 1.00 | 1.00 |
| 531.1  | 638   | 191014 | 0.04 | 0.06 | 0.14 | 0.26 | 0.04 | 0.07 | 0.16 | 0.26 | 0.03 | 0.04 | 0.06 | 0.09 | 0.06 | 0.17 | 0.52 | 0.86 |
| 531.2  | 4026  | 191014 | 0.06 | 0.19 | 0.60 | 0.91 | 0.07 | 0.22 | 0.67 | 0.95 | 0.04 | 0.07 | 0.17 | 0.33 | 0.17 | 0.71 | 1.00 | 1.00 |
| 531.3  | 2794  | 191014 | 0.06 | 0.15 | 0.45 | 0.79 | 0.06 | 0.17 | 0.52 | 0.85 | 0.04 | 0.06 | 0.13 | 0.25 | 0.13 | 0.55 | 0.99 | 1.00 |
| 531.4  | 404   | 191014 | 0.03 | 0.05 | 0.10 | 0.18 | 0.04 | 0.06 | 0.12 | 0.21 | 0.03 | 0.04 | 0.05 | 0.07 | 0.05 | 0.12 | 0.36 | 0.67 |
| 532    | 6669  | 191014 | 0.08 | 0.29 | 0.80 | 0.99 | 0.09 | 0.34 | 0.87 | 0.99 | 0.04 | 0.10 | 0.26 | 0.50 | 0.25 | 0.89 | 1.00 | 1.00 |
| 535    | 28094 | 191014 | 0.19 | 0.78 | 1.00 | 1.00 | 0.22 | 0.85 | 1.00 | 1.00 | 0.07 | 0.25 | 0.72 | 0.97 | 0.70 | 1.00 | 1.00 | 1.00 |
| 535.1  | 1145  | 191014 | 0.04 | 0.09 | 0.22 | 0.43 | 0.04 | 0.09 | 0.25 | 0.49 | 0.03 | 0.05 | 0.08 | 0.13 | 0.08 | 0.27 | 0.77 | 0.98 |
| 535.2  | 372   | 191014 | 0.03 | 0.05 | 0.10 | 0.17 | 0.03 | 0.06 | 0.11 | 0.20 | 0.03 | 0.04 | 0.05 | 0.07 | 0.05 | 0.12 | 0.34 | 0.64 |
| 535.6  | 7254  | 191014 | 0.08 | 0.31 | 0.83 | 0.99 | 0.09 | 0.36 | 0.89 | 0.99 | 0.05 | 0.10 | 0.27 | 0.53 | 0.27 | 0.92 | 1.00 | 1.00 |
| 535.8  | 8264  | 191014 | 0.09 | 0.34 | 0.88 | 1.00 | 0.10 | 0.40 | 0.93 | 1.00 | 0.05 | 0.11 | 0.30 | 0.58 | 0.29 | 0.94 | 1.00 | 1.00 |
| 536    | 11052 | 191014 | 0.11 | 0.43 | 0.95 | 1.00 | 0.12 | 0.50 | 0.97 | 1.00 | 0.05 | 0.13 | 0.38 | 0.70 | 0.37 | 0.98 | 1.00 | 1.00 |
| 536.8  | 11046 | 191014 | 0.11 | 0.43 | 0.95 | 1.00 | 0.12 | 0.50 | 0.97 | 1.00 | 0.05 | 0.13 | 0.38 | 0.70 | 0.37 | 0.98 | 1.00 | 1.00 |
| 537    | 3459  | 191014 | 0.06 | 0.17 | 0.53 | 0.87 | 0.07 | 0.20 | 0.61 | 0.92 | 0.04 | 0.07 | 0.16 | 0.30 | 0.15 | 0.64 | 1.00 | 1.00 |
| 540    | 3462  | 191014 | 0.06 | 0.17 | 0.53 | 0.87 | 0.07 | 0.20 | 0.61 | 0.92 | 0.04 | 0.07 | 0.16 | 0.30 | 0.15 | 0.64 | 1.00 | 1.00 |
| 540.1  | 3299  | 191014 | 0.06 | 0.17 | 0.51 | 0.85 | 0.06 | 0.19 | 0.59 | 0.91 | 0.04 | 0.07 | 0.15 | 0.28 | 0.15 | 0.62 | 1.00 | 1.00 |
| 540.11 | 2801  | 191014 | 0.06 | 0.15 | 0.45 | 0.79 | 0.06 | 0.17 | 0.52 | 0.85 | 0.04 | 0.06 | 0.13 | 0.25 | 0.13 | 0.55 | 0.99 | 1.00 |
| 550    | 45454 | 191014 | 0.27 | 0.92 | 1.00 | 1.00 | 0.31 | 0.96 | 1.00 | 1.00 | 0.09 | 0.34 | 0.88 | 1.00 | 0.86 | 1.00 | 1.00 | 1.00 |
| 550.1  | 15079 | 191014 | 0.13 | 0.54 | 0.99 | 1.00 | 0.15 | 0.62 | 0.99 | 1.00 | 0.06 | 0.16 | 0.49 | 0.82 | 0.47 | 1.00 | 1.00 | 1.00 |
| 550.2  | 26753 | 191014 | 0.19 | 0.77 | 1.00 | 1.00 | 0.22 | 0.83 | 1.00 | 1.00 | 0.07 | 0.24 | 0.70 | 0.96 | 0.69 | 1.00 | 1.00 | 1.00 |
| 550.3  | 634   | 191014 | 0.04 | 0.06 | 0.14 | 0.26 | 0.04 | 0.07 | 0.16 | 0.30 | 0.03 | 0.04 | 0.06 | 0.09 | 0.06 | 0.17 | 0.52 | 0.85 |
| 550.4  | 3634  | 191014 | 0.06 | 0.18 | 0.55 | 0.88 | 0.07 | 0.21 | 0.63 | 0.93 | 0.04 | 0.07 | 0.16 | 0.31 | 0.16 | 0.66 | 1.00 | 1.00 |
| 550.5  | 3384  | 191014 | 0.06 | 0.17 | 0.52 | 0.86 | 0.06 | 0.20 | 0.60 | 0.91 | 0.04 | 0.07 | 0.15 | 0.29 | 0.15 | 0.63 | 1.00 | 1.00 |
| 550.6  | 246   | 191014 | 0.03 | 0.05 | 0.08 | 0.13 | 0.03 | 0.05 | 0.09 | 0.14 | 0.03 | 0.03 | 0.04 | 0.06 | 0.04 | 0.09 | 0.24 | 0.47 |
| 555    | 4149  | 191014 | 0.07 | 0.20 | 0.61 | 0.92 | 0.07 | 0.23 | 0.68 | 0.96 | 0.04 | 0.07 | 0.18 | 0.34 | 0.17 | 0.72 | 1.00 | 1.00 |
| 555.1  | 1621  | 191014 | 0.05 | 0.10 | 0.29 | 0.56 | 0.05 | 0.12 | 0.34 | 0.63 | 0.03 | 0.05 | 0.10 | 0.16 | 0.09 | 0.36 | 0.89 | 1.00 |
| 555.2  | 2920  | 191014 | 0.06 | 0.15 | 0.47 | 0.80 | 0.06 | 0.18 | 0.54 | 0.87 | 0.04 | 0.06 | 0.14 | 0.26 | 0.13 | 0.57 | 0.99 | 1.00 |
| 555.21 | 541   | 191014 | 0.04 | 0    |      |      |      |      |      |      |      |      |      |      |      |      |      |      |

|        |       |        |      |      |      |      |      |      |      |      |      |      |      |      |      |      |      |      |
|--------|-------|--------|------|------|------|------|------|------|------|------|------|------|------|------|------|------|------|------|
| 558    | 13696 | 191014 | 0.12 | 0.51 | 0.98 | 1.00 | 0.14 | 0.58 | 0.99 | 1.00 | 0.06 | 0.15 | 0.45 | 0.79 | 0.44 | 0.99 | 1.00 | 1.00 |
| 559    | 1579  | 191014 | 0.05 | 0.10 | 0.28 | 0.55 | 0.05 | 0.11 | 0.33 | 0.62 | 0.03 | 0.05 | 0.09 | 0.16 | 0.09 | 0.35 | 0.88 | 1.00 |
| 560    | 4175  | 191014 | 0.07 | 0.20 | 0.61 | 0.92 | 0.07 | 0.23 | 0.69 | 0.96 | 0.04 | 0.07 | 0.18 | 0.34 | 0.17 | 0.72 | 1.00 | 1.00 |
| 560.1  | 602   | 191014 | 0.04 | 0.06 | 0.14 | 0.25 | 0.04 | 0.07 | 0.15 | 0.29 | 0.03 | 0.04 | 0.06 | 0.09 | 0.06 | 0.16 | 0.50 | 0.83 |
| 560.2  | 282   | 191014 | 0.03 | 0.05 | 0.09 | 0.14 | 0.03 | 0.05 | 0.09 | 0.14 | 0.03 | 0.03 | 0.05 | 0.06 | 0.05 | 0.10 | 0.27 | 0.52 |
| 560.3  | 874   | 191014 | 0.04 | 0.07 | 0.18 | 0.34 | 0.04 | 0.08 | 0.20 | 0.40 | 0.03 | 0.04 | 0.07 | 0.11 | 0.07 | 0.22 | 0.65 | 0.94 |
| 560.4  | 3467  | 191014 | 0.06 | 0.17 | 0.53 | 0.87 | 0.07 | 0.20 | 0.61 | 0.92 | 0.04 | 0.07 | 0.16 | 0.30 | 0.15 | 0.64 | 1.00 | 1.00 |
| 561    | 16127 | 191014 | 0.13 | 0.57 | 0.99 | 1.00 | 0.15 | 0.65 | 1.00 | 1.00 | 0.06 | 0.17 | 0.51 | 0.85 | 0.49 | 1.00 | 1.00 | 1.00 |
| 561.1  | 536   | 191014 | 0.04 | 0.06 | 0.13 | 0.23 | 0.04 | 0.06 | 0.14 | 0.26 | 0.03 | 0.04 | 0.06 | 0.08 | 0.06 | 0.15 | 0.45 | 0.79 |
| 561.2  | 1767  | 191014 | 0.05 | 0.11 | 0.31 | 0.59 | 0.05 | 0.11 | 0.36 | 0.67 | 0.03 | 0.12 | 0.05 | 0.10 | 0.10 | 0.39 | 0.92 | 1.00 |
| 562    | 28363 | 191014 | 0.20 | 0.79 | 1.00 | 1.00 | 0.22 | 0.85 | 1.00 | 1.00 | 0.07 | 0.25 | 0.72 | 0.97 | 0.71 | 1.00 | 1.00 | 1.00 |
| 562.1  | 28326 | 191014 | 0.20 | 0.79 | 1.00 | 1.00 | 0.22 | 0.85 | 1.00 | 1.00 | 0.07 | 0.25 | 0.72 | 0.97 | 0.71 | 1.00 | 1.00 | 1.00 |
| 563    | 10878 | 191014 | 0.11 | 0.43 | 0.94 | 1.00 | 0.12 | 0.49 | 0.97 | 1.00 | 0.05 | 0.13 | 0.38 | 0.70 | 0.37 | 0.98 | 1.00 | 1.00 |
| 564    | 22341 | 191014 | 0.17 | 0.70 | 1.00 | 1.00 | 0.19 | 0.77 | 1.00 | 1.00 | 0.07 | 0.21 | 0.63 | 0.93 | 0.62 | 1.00 | 1.00 | 1.00 |
| 564.1  | 5580  | 191014 | 0.07 | 0.25 | 0.73 | 0.97 | 0.08 | 0.29 | 0.80 | 0.99 | 0.04 | 0.09 | 0.22 | 0.44 | 0.22 | 0.84 | 1.00 | 1.00 |
| 564.8  | 1743  | 191014 | 0.05 | 0.11 | 0.31 | 0.59 | 0.05 | 0.12 | 0.36 | 0.67 | 0.03 | 0.05 | 0.10 | 0.17 | 0.10 | 0.38 | 0.91 | 1.00 |
| 564.9  | 15641 | 191014 | 0.13 | 0.56 | 0.99 | 1.00 | 0.15 | 0.63 | 1.00 | 1.00 | 0.06 | 0.16 | 0.50 | 0.84 | 0.48 | 1.00 | 1.00 | 1.00 |
| 565    | 14352 | 191014 | 0.13 | 0.53 | 0.98 | 1.00 | 0.14 | 0.60 | 0.99 | 1.00 | 0.06 | 0.15 | 0.47 | 0.81 | 0.45 | 1.00 | 1.00 | 1.00 |
| 565.1  | 7409  | 191014 | 0.09 | 0.32 | 0.84 | 0.99 | 0.09 | 0.37 | 0.90 | 1.00 | 0.05 | 0.10 | 0.28 | 0.54 | 0.27 | 0.92 | 1.00 | 1.00 |
| 567    | 949   | 191014 | 0.04 | 0.08 | 0.19 | 0.37 | 0.04 | 0.09 | 0.22 | 0.42 | 0.03 | 0.04 | 0.07 | 0.11 | 0.07 | 0.23 | 0.69 | 0.96 |
| 568    | 3567  | 191014 | 0.06 | 0.18 | 0.55 | 0.88 | 0.07 | 0.20 | 0.62 | 0.92 | 0.04 | 0.07 | 0.16 | 0.30 | 0.16 | 0.66 | 1.00 | 1.00 |
| 568.1  | 3346  | 191014 | 0.06 | 0.17 | 0.52 | 0.85 | 0.06 | 0.19 | 0.59 | 0.85 | 0.04 | 0.07 | 0.15 | 0.29 | 0.15 | 0.63 | 1.00 | 1.00 |
| 569    | 4313  | 191014 | 0.07 | 0.21 | 0.62 | 0.93 | 0.07 | 0.24 | 0.70 | 0.96 | 0.04 | 0.08 | 0.18 | 0.35 | 0.18 | 0.74 | 1.00 | 1.00 |
| 569.1  | 208   | 191014 | 0.03 | 0.04 | 0.07 | 0.11 | 0.03 | 0.05 | 0.08 | 0.13 | 0.03 | 0.03 | 0.04 | 0.05 | 0.04 | 0.08 | 0.21 | 0.41 |
| 569.2  | 515   | 191014 | 0.04 | 0.06 | 0.12 | 0.22 | 0.04 | 0.06 | 0.14 | 0.26 | 0.03 | 0.04 | 0.06 | 0.08 | 0.06 | 0.15 | 0.44 | 0.77 |
| 571    | 4206  | 191014 | 0.07 | 0.20 | 0.61 | 0.92 | 0.07 | 0.23 | 0.69 | 0.96 | 0.04 | 0.08 | 0.18 | 0.35 | 0.17 | 0.73 | 1.00 | 1.00 |
| 571.5  | 3329  | 191014 | 0.06 | 0.17 | 0.52 | 0.85 | 0.06 | 0.19 | 0.59 | 0.85 | 0.04 | 0.07 | 0.15 | 0.29 | 0.15 | 0.63 | 1.00 | 1.00 |
| 571.51 | 749   | 191014 | 0.04 | 0.07 | 0.16 | 0.30 | 0.04 | 0.08 | 0.18 | 0.35 | 0.03 | 0.04 | 0.06 | 0.10 | 0.06 | 0.19 | 0.59 | 0.91 |
| 571.6  | 258   | 191014 | 0.03 | 0.05 | 0.08 | 0.13 | 0.03 | 0.05 | 0.09 | 0.15 | 0.03 | 0.03 | 0.04 | 0.06 | 0.04 | 0.09 | 0.25 | 0.48 |
| 571.8  | 1140  | 191014 | 0.04 | 0.09 | 0.22 | 0.42 | 0.04 | 0.09 | 0.25 | 0.49 | 0.03 | 0.05 | 0.08 | 0.13 | 0.08 | 0.27 | 0.77 | 0.98 |
| 571.81 | 589   | 191014 | 0.04 | 0.06 | 0.13 | 0.25 | 0.04 | 0.06 | 0.15 | 0.28 | 0.03 | 0.04 | 0.06 | 0.09 | 0.06 | 0.16 | 0.49 | 0.83 |
| 572    | 1656  | 191014 | 0.05 | 0.11 | 0.29 | 0.57 | 0.05 | 0.12 | 0.34 | 0.64 | 0.03 | 0.05 | 0.10 | 0.17 | 0.09 | 0.37 | 0.90 | 1.00 |
| 573    | 1712  | 191014 | 0.05 | 0.11 | 0.30 | 0.58 | 0.05 | 0.12 | 0.35 | 0.66 | 0.03 | 0.05 | 0.10 | 0.17 | 0.10 | 0.38 | 0.91 | 1.00 |
| 573.3  | 295   | 191014 | 0.03 | 0.05 | 0.09 | 0.15 | 0.03 | 0.05 | 0.10 | 0.16 | 0.03 | 0.03 | 0.05 | 0.06 | 0.05 | 0.10 | 0.28 | 0.54 |
| 573.5  | 914   | 191014 | 0.04 | 0.08 | 0.18 | 0.35 | 0.04 | 0.08 | 0.21 | 0.35 | 0.03 | 0.08 | 0.04 | 0.07 | 0.11 | 0.07 | 0.22 | 0.67 |
| 573.7  | 3714  | 191014 | 0.06 | 0.18 | 0.56 | 0.89 | 0.07 | 0.21 | 0.64 | 0.93 | 0.04 | 0.07 | 0.16 | 0.31 | 0.16 | 0.67 | 1.00 | 1.00 |
| 573.9  | 214   | 191014 | 0.03 | 0.04 | 0.07 | 0.12 | 0.03 | 0.05 | 0.08 | 0.13 | 0.03 | 0.03 | 0.04 | 0.05 | 0.04 | 0.08 | 0.21 | 0.42 |
| 574    | 15179 | 191014 | 0.13 | 0.55 | 0.99 | 1.00 | 0.15 | 0.62 | 1.00 | 1.00 | 0.06 | 0.16 | 0.49 | 0.82 | 0.47 | 1.00 | 1.00 | 1.00 |
| 574.1  | 12924 | 191014 | 0.12 | 0.49 | 0.97 | 1.00 | 0.13 | 0.56 | 0.97 | 1.00 | 0.05 | 0.14 | 0.43 | 0.77 | 0.42 | 0.99 | 1.00 | 1.00 |
| 574.11 | 1537  | 191014 | 0.05 | 0.10 | 0.28 | 0.54 | 0.05 | 0.11 | 0.32 | 0.61 | 0.03 | 0.11 | 0.05 | 0.09 | 0.09 | 0.34 | 0.88 | 1.00 |
| 574.12 | 5200  | 191014 | 0.07 | 0.24 | 0.70 | 0.96 | 0.08 | 0.27 | 0.78 | 0.98 | 0.04 | 0.08 | 0.21 | 0.41 | 0.20 | 0.81 | 1.00 | 1.00 |
| 574.2  | 2550  | 191014 | 0.05 | 0.14 | 0.42 | 0.75 | 0.06 | 0.16 | 0.48 | 0.82 | 0.04 | 0.06 | 0.13 | 0.23 | 0.12 | 0.52 | 0.98 | 1.00 |
| 574.3  | 2574  | 191014 | 0.05 | 0.14 | 0.42 | 0.75 | 0.06 | 0.16 | 0.49 | 0.82 | 0.04 | 0.06 | 0.13 | 0.23 | 0.12 | 0.52 | 0.98 | 1.00 |
| 575    | 3989  | 191014 | 0.06 | 0.19 | 0.59 | 0.91 | 0.07 | 0.22 | 0.67 | 0.95 | 0.04 | 0.07 | 0.17 | 0.33 | 0.17 | 0.70 | 1.00 | 1.00 |
| 575.1  | 599   | 191014 | 0.04 | 0.06 | 0.13 | 0.25 | 0.04 | 0.07 | 0.15 | 0.29 | 0.03 | 0.04 | 0.06 | 0.09 | 0.06 | 0.16 | 0.50 | 0.83 |
| 575.2  | 850   | 191014 | 0.04 | 0.07 | 0.17 | 0.33 | 0.04 | 0.08 | 0.20 | 0.39 | 0.03 | 0.04 | 0.07 | 0.11 | 0.07 | 0.21 | 0.64 | 0.94 |
| 575.6  | 437   | 191014 | 0.03 | 0.06 | 0.11 | 0.19 | 0.04 | 0.06 | 0.12 | 0.22 | 0.03 | 0.04 | 0.05 | 0.07 | 0.05 | 0.13 | 0.38 | 0.71 |
| 575.7  | 1372  | 191014 | 0.04 | 0.09 | 0.25 | 0.49 | 0.05 | 0.09 | 0.25 | 0.49 | 0.03 | 0.11 | 0.05 | 0.09 | 0.09 | 0.31 | 0.84 | 0.99 |
| 575.8  | 1096  | 191014 | 0.04 | 0.08 | 0.21 | 0.41 | 0.04 | 0.09 | 0.24 | 0.47 | 0.03 | 0.05 | 0.08 | 0.12 | 0.08 | 0.26 | 0.75 | 0.98 |
| 575.9  | 360   | 191014 | 0.03 | 0.05 | 0.10 | 0.17 | 0.03 | 0.06 | 0.11 | 0.19 | 0.03 | 0.04 | 0.05 | 0.07 | 0.05 | 0.11 | 0.33 | 0.62 |
| 577    | 2747  | 191014 | 0.06 | 0.15 | 0.45 | 0.78 | 0.06 | 0.17 | 0.51 | 0.85 | 0.04 | 0.06 | 0.13 | 0.25 | 0.13 | 0.55 | 0.99 | 1.00 |
| 577.1  | 1925  | 191014 | 0.05 | 0.12 | 0.33 | 0.63 | 0.05 | 0.13 | 0.39 | 0.71 | 0.03 | 0.13 | 0.05 | 0.11 | 0.10 | 0.41 | 0.94 | 1.00 |
| 577.2  | 473   | 191014 | 0.04 | 0.06 | 0.12 | 0.21 | 0.04 | 0.06 | 0.13 | 0.24 | 0.03 | 0.04 | 0.05 | 0.08 | 0.05 | 0.14 | 0.41 | 0.74 |
| 577.3  | 388   | 191014 | 0.03 | 0.05 | 0.10 | 0.18 | 0.04 | 0.06 | 0.11 | 0.20 | 0.03 | 0.04 | 0.05 | 0.07 | 0.05 | 0.12 | 0.35 | 0.65 |
| 578    | 19880 | 191014 | 0.15 | 0.65 | 1.00 | 1.00 | 0.18 | 0.73 | 1.00 | 1.00 | 0.06 | 0.19 | 0.59 | 0.91 | 0.57 | 1.00 | 1.00 | 1.00 |
| 578.1  | 1882  | 191014 | 0.05 | 0.11 | 0.33 | 0.62 | 0.05 | 0.13 | 0.38 | 0.70 | 0.03 | 0.05 | 0.10 | 0.18 | 0.10 | 0.41 | 0.93 | 1.00 |
| 578.2  | 2514  | 191014 | 0.05 | 0.14 | 0.42 | 0.74 | 0.06 | 0.16 | 0.48 | 0.82 | 0.04 | 0.16 | 0.06 | 0.13 | 0.12 | 0.51 | 0.98 | 1.00 |
| 578.8  | 11473 | 191014 | 0.11 | 0.45 | 0.95 | 1.00 | 0.12 | 0.51 | 0.98 | 1.00 | 0.05 | 0.13 | 0.39 | 0.72 | 0.38 | 0.99 | 1.00 | 1.00 |
| 578.9  | 6068  | 191014 | 0.08 | 0.27 | 0.77 | 0.98 | 0.08 | 0.31 | 0.84 | 0.99 | 0.04 | 0.09 | 0.24 | 0.46 | 0.23 | 0.86 | 1.00 | 1.00 |
| 579    | 1543  | 191014 | 0.05 | 0.10 | 0.28 | 0.54 | 0.05 | 0.11 | 0.32 | 0.61 | 0.03 | 0.05 | 0.09 | 0.16 | 0.09 | 0.35 | 0.88 | 1.00 |
| 579.2  | 447   | 191014 | 0.03 | 0.06 | 0.11 | 0.20 | 0.04 | 0.06 | 0.11 | 0.20 | 0.03 | 0.06 | 0.05 | 0.07 | 0.05 | 0.13 | 0.39 | 0.72 |
| 579.8  | 1887  | 191014 | 0.05 | 0.11 | 0.33 | 0.62 | 0.05 | 0.13 | 0.38 | 0.70 | 0.03 | 0.05 | 0.10 | 0.18 | 0.10 | 0.41 | 0.93 | 1.00 |
| 580    | 1984  | 234338 | 0.05 | 0.12 | 0.34 | 0.64 | 0.05 | 0.13 | 0.40 | 0.72 | 0.03 | 0.05 | 0.11 | 0.19 | 0.11 | 0.42 | 0.94 | 1.00 |
| 580.1  | 906   | 234338 | 0.04 | 0.08 | 0.18 | 0.35 | 0.04 | 0.08 | 0.21 | 0.41 | 0.03 | 0.04 | 0.07 | 0.11 | 0.07 | 0.22 | 0.67 | 0.95 |
| 580.14 | 723   | 234338 | 0.04 | 0.07 | 0.15 | 0.29 | 0.04 | 0.07 | 0.18 | 0.34 | 0.03 | 0.04 | 0.06 | 0.10 | 0.06 | 0.19 | 0.57 | 0.90 |
| 580.2  | 1042  | 234338 | 0.04 | 0.08 | 0.20 | 0.39 | 0.04 | 0.09 | 0.23 | 0.46 | 0.03 | 0.04 | 0.08 | 0.12 | 0.07 | 0.25 | 0.73 | 0.97 |
| 580.3  | 301   | 234338 | 0.03 | 0.05 | 0.09 | 0.15 | 0.03 | 0.05 | 0.10 | 0.17 | 0.03 | 0.03 | 0.05 | 0.06 | 0.05 | 0.10 | 0.28 | 0.55 |
| 580.32 | 286   | 234338 | 0.03 | 0.05 | 0.09 | 0.14 | 0.03 | 0.05 | 0.09 | 0.16 | 0.03 | 0.03 | 0.05 | 0.06 | 0.05 | 0.10 | 0.27 | 0.53 |
| 585    | 10995 | 234338 | 0.11 | 0.43 | 0.95 | 1.00 | 0.12 | 0.50 | 0.98 | 1.00 | 0.05 | 0.13 | 0.38 | 0.71 | 0.37 | 0.98 | 1.00 | 1.00 |
| 585.1  | 6203  | 234338 | 0.08 |      |      |      |      |      |      |      |      |      |      |      |      |      |      |      |

|        |       |        |      |      |      |      |      |      |      |      |      |      |      |      |      |      |      |      |      |
|--------|-------|--------|------|------|------|------|------|------|------|------|------|------|------|------|------|------|------|------|------|
| 585.33 | 3054  | 234338 | 0.06 | 0.16 | 0.49 | 0.82 | 0.06 | 0.18 | 0.56 | 0.88 | 0.04 | 0.07 | 0.14 | 0.27 | 0.14 | 0.59 | 0.99 | 1.00 |      |
| 585.34 | 455   | 234338 | 0.04 | 0.06 | 0.11 | 0.20 | 0.04 | 0.06 | 0.13 | 0.23 | 0.03 | 0.04 | 0.05 | 0.07 | 0.05 | 0.13 | 0.40 | 0.72 |      |
| 585.4  | 343   | 234338 | 0.03 | 0.05 | 0.09 | 0.16 | 0.03 | 0.05 | 0.11 | 0.18 | 0.03 | 0.04 | 0.05 | 0.07 | 0.05 | 0.11 | 0.31 | 0.60 |      |
| 586    | 3536  | 234338 | 0.06 | 0.18 | 0.54 | 0.87 | 0.07 | 0.20 | 0.62 | 0.92 | 0.04 | 0.07 | 0.16 | 0.30 | 0.15 | 0.65 | 1.00 | 1.00 |      |
| 586.1  | 232   | 234338 | 0.03 | 0.05 | 0.08 | 0.12 | 0.03 | 0.05 | 0.08 | 0.12 | 0.03 | 0.03 | 0.04 | 0.06 | 0.04 | 0.09 | 0.23 | 0.45 |      |
| 586.11 | 200   | 234338 | 0.03 | 0.04 | 0.07 | 0.11 | 0.03 | 0.05 | 0.08 | 0.13 | 0.03 | 0.03 | 0.04 | 0.05 | 0.04 | 0.08 | 0.20 | 0.39 |      |
| 586.2  | 1393  | 234338 | 0.04 | 0.10 | 0.26 | 0.50 | 0.05 | 0.11 | 0.30 | 0.57 | 0.03 | 0.05 | 0.09 | 0.15 | 0.09 | 0.32 | 0.84 | 0.99 |      |
| 586.4  | 936   | 234338 | 0.04 | 0.08 | 0.19 | 0.36 | 0.04 | 0.08 | 0.21 | 0.42 | 0.03 | 0.04 | 0.07 | 0.11 | 0.07 | 0.23 | 0.68 | 0.96 |      |
| 587    | 334   | 234338 | 0.03 | 0.05 | 0.09 | 0.16 | 0.03 | 0.05 | 0.10 | 0.18 | 0.03 | 0.04 | 0.05 | 0.06 | 0.05 | 0.11 | 0.31 | 0.59 |      |
| 590    | 1361  | 234338 | 0.04 | 0.09 | 0.25 | 0.49 | 0.05 | 0.10 | 0.29 | 0.56 | 0.03 | 0.10 | 0.05 | 0.09 | 0.14 | 0.08 | 0.31 | 0.99 |      |
| 591    | 12543 | 234338 | 0.12 | 0.48 | 0.97 | 1.00 | 0.13 | 0.55 | 0.99 | 1.00 | 0.05 | 0.14 | 0.43 | 0.76 | 0.41 | 0.99 | 1.00 | 1.00 |      |
| 592    | 2885  | 234338 | 0.06 | 0.15 | 0.46 | 0.80 | 0.06 | 0.17 | 0.53 | 0.87 | 0.04 | 0.06 | 0.14 | 0.26 | 0.13 | 0.57 | 0.99 | 1.00 |      |
| 592.1  | 2766  | 234338 | 0.06 | 0.15 | 0.45 | 0.78 | 0.06 | 0.17 | 0.52 | 0.85 | 0.04 | 0.06 | 0.13 | 0.25 | 0.13 | 0.55 | 0.99 | 1.00 |      |
| 592.12 | 833   | 234338 | 0.04 | 0.07 | 0.17 | 0.33 | 0.04 | 0.07 | 0.20 | 0.38 | 0.03 | 0.08 | 0.04 | 0.07 | 0.07 | 0.21 | 0.63 | 0.93 |      |
| 592.13 | 233   | 234338 | 0.03 | 0.05 | 0.08 | 0.12 | 0.03 | 0.05 | 0.08 | 0.14 | 0.03 | 0.03 | 0.04 | 0.06 | 0.04 | 0.09 | 0.23 | 0.45 |      |
| 593    | 14542 | 234338 | 0.13 | 0.54 | 0.98 | 1.00 | 0.14 | 0.61 | 0.99 | 1.00 | 0.06 | 0.16 | 0.48 | 0.81 | 0.46 | 1.00 | 1.00 | 1.00 |      |
| 594    | 6165  | 234338 | 0.08 | 0.27 | 0.78 | 0.98 | 0.09 | 0.32 | 0.84 | 0.99 | 0.04 | 0.09 | 0.24 | 0.47 | 0.24 | 0.87 | 1.00 | 1.00 |      |
| 594.1  | 3198  | 234338 | 0.06 | 0.16 | 0.50 | 0.84 | 0.06 | 0.19 | 0.58 | 0.90 | 0.04 | 0.07 | 0.15 | 0.28 | 0.14 | 0.61 | 0.99 | 1.00 |      |
| 594.2  | 767   | 234338 | 0.04 | 0.07 | 0.16 | 0.31 | 0.04 | 0.08 | 0.18 | 0.35 | 0.03 | 0.04 | 0.07 | 0.10 | 0.06 | 0.20 | 0.60 | 0.91 |      |
| 594.3  | 2243  | 234338 | 0.05 | 0.13 | 0.38 | 0.70 | 0.05 | 0.15 | 0.44 | 0.77 | 0.04 | 0.06 | 0.12 | 0.21 | 0.11 | 0.47 | 0.96 | 1.00 |      |
| 594.8  | 1754  | 234338 | 0.05 | 0.11 | 0.31 | 0.59 | 0.05 | 0.12 | 0.36 | 0.67 | 0.03 | 0.05 | 0.10 | 0.17 | 0.10 | 0.38 | 0.91 | 1.00 |      |
| 595    | 2075  | 234338 | 0.05 | 0.12 | 0.36 | 0.66 | 0.05 | 0.12 | 0.41 | 0.66 | 0.03 | 0.06 | 0.11 | 0.20 | 0.11 | 0.44 | 0.95 | 1.00 |      |
| 596    | 9275  | 234338 | 0.10 | 0.38 | 0.91 | 1.00 | 0.11 | 0.44 | 0.95 | 1.00 | 0.05 | 0.12 | 0.34 | 0.64 | 0.33 | 0.96 | 1.00 | 1.00 |      |
| 596.1  | 1831  | 234338 | 0.05 | 0.11 | 0.32 | 0.61 | 0.05 | 0.13 | 0.37 | 0.69 | 0.03 | 0.05 | 0.10 | 0.18 | 0.10 | 0.40 | 0.93 | 1.00 |      |
| 596.5  | 1431  | 234338 | 0.04 | 0.10 | 0.26 | 0.51 | 0.05 | 0.11 | 0.30 | 0.58 | 0.03 | 0.05 | 0.09 | 0.15 | 0.09 | 0.32 | 0.85 | 0.99 |      |
| 597    | 3888  | 234338 | 0.06 | 0.19 | 0.58 | 0.90 | 0.07 | 0.22 | 0.66 | 0.90 | 0.04 | 0.07 | 0.17 | 0.33 | 0.17 | 0.69 | 1.00 | 1.00 |      |
| 597.1  | 3159  | 234338 | 0.06 | 0.16 | 0.50 | 0.84 | 0.06 | 0.19 | 0.57 | 0.89 | 0.04 | 0.07 | 0.15 | 0.28 | 0.14 | 0.61 | 0.99 | 1.00 |      |
| 598    | 3286  | 234338 | 0.06 | 0.17 | 0.51 | 0.85 | 0.06 | 0.19 | 0.59 | 0.90 | 0.04 | 0.07 | 0.15 | 0.28 | 0.15 | 0.62 | 1.00 | 1.00 |      |
| 598.9  | 299   | 234338 | 0.03 | 0.05 | 0.09 | 0.15 | 0.03 | 0.05 | 0.10 | 0.17 | 0.03 | 0.03 | 0.05 | 0.06 | 0.05 | 0.10 | 0.28 | 0.54 |      |
| 599    | 17536 | 234338 | 0.14 | 0.61 | 0.99 | 1.00 | 0.16 | 0.69 | 1.00 | 1.00 | 0.06 | 0.18 | 0.55 | 0.88 | 0.53 | 1.00 | 1.00 | 1.00 |      |
| 599.2  | 7478  | 234338 | 0.09 | 0.32 | 0.85 | 0.99 | 0.10 | 0.37 | 0.90 | 0.99 | 0.05 | 0.10 | 0.28 | 0.55 | 0.27 | 0.92 | 1.00 | 1.00 |      |
| 599.3  | 1104  | 234338 | 0.04 | 0.08 | 0.21 | 0.41 | 0.04 | 0.09 | 0.24 | 0.48 | 0.03 | 0.05 | 0.08 | 0.12 | 0.08 | 0.26 | 0.75 | 0.98 |      |
| 599.4  | 8031  | 234338 | 0.09 | 0.34 | 0.87 | 1.00 | 0.10 | 0.39 | 0.92 | 1.00 | 0.05 | 0.11 | 0.30 | 0.58 | 0.29 | 0.94 | 1.00 | 1.00 |      |
| 599.5  | 3626  | 234338 | 0.06 | 0.18 | 0.55 | 0.88 | 0.07 | 0.21 | 0.63 | 0.93 | 0.04 | 0.07 | 0.16 | 0.31 | 0.16 | 0.66 | 1.00 | 1.00 |      |
| 599.9  | 1683  | 234338 | 0.05 | 0.11 | 0.30 | 0.57 | 0.05 | 0.11 | 0.35 | 0.65 | 0.03 | 0.05 | 0.10 | 0.17 | 0.10 | 0.37 | 0.90 | 1.00 |      |
| 600    | 11447 | 114193 | 0.11 | 0.43 | 0.95 | 1.00 | 0.12 | 0.50 | 0.97 | 1.00 | 0.05 | 0.13 | 0.38 | 0.70 | 0.37 | 0.98 | 1.00 | 1.00 |      |
| 601    | 2119  | 114193 | 0.05 | 0.12 | 0.36 | 0.67 | 0.05 | 0.14 | 0.42 | 0.75 | 0.04 | 0.06 | 0.11 | 0.20 | 0.11 | 0.44 | 0.95 | 1.00 |      |
| 601.1  | 1527  | 114193 | 0.05 | 0.10 | 0.27 | 0.53 | 0.05 | 0.11 | 0.32 | 0.61 | 0.03 | 0.05 | 0.09 | 0.16 | 0.09 | 0.34 | 0.87 | 1.00 |      |
| 601.11 | 231   | 114193 | 0.03 | 0.05 | 0.08 | 0.12 | 0.03 | 0.05 | 0.08 | 0.12 | 0.03 | 0.03 | 0.04 | 0.06 | 0.04 | 0.09 | 0.23 | 0.44 |      |
| 601.12 | 908   | 114193 | 0.04 | 0.08 | 0.18 | 0.35 | 0.04 | 0.08 | 0.21 | 0.41 | 0.03 | 0.04 | 0.07 | 0.11 | 0.07 | 0.22 | 0.67 | 0.95 |      |
| 601.4  | 283   | 114193 | 0.03 | 0.05 | 0.09 | 0.14 | 0.03 | 0.05 | 0.09 | 0.16 | 0.03 | 0.03 | 0.05 | 0.06 | 0.05 | 0.10 | 0.27 | 0.52 |      |
| 601.8  | 291   | 114193 | 0.03 | 0.05 | 0.09 | 0.14 | 0.03 | 0.05 | 0.10 | 0.16 | 0.03 | 0.03 | 0.05 | 0.06 | 0.05 | 0.10 | 0.27 | 0.53 |      |
| 602    | 1292  | 114193 | 0.04 | 0.09 | 0.24 | 0.47 | 0.05 | 0.10 | 0.28 | 0.54 | 0.03 | 0.05 | 0.08 | 0.14 | 0.08 | 0.30 | 0.81 | 0.99 |      |
| 603    | 2075  | 117407 | 0.05 | 0.12 | 0.35 | 0.66 | 0.05 | 0.12 | 0.41 | 0.66 | 0.03 | 0.06 | 0.11 | 0.20 | 0.11 | 0.44 | 0.95 | 1.00 |      |
| 603.1  | 1274  | 117407 | 0.04 | 0.09 | 0.24 | 0.46 | 0.05 | 0.10 | 0.27 | 0.53 | 0.03 | 0.05 | 0.08 | 0.14 | 0.08 | 0.29 | 0.81 | 0.99 |      |
| 604    | 3185  | 117407 | 0.06 | 0.16 | 0.50 | 0.83 | 0.06 | 0.19 | 0.57 | 0.89 | 0.04 | 0.07 | 0.15 | 0.27 | 0.14 | 0.60 | 0.99 | 1.00 |      |
| 604.1  | 2635  | 117407 | 0.05 | 0.14 | 0.43 | 0.76 | 0.06 | 0.16 | 0.49 | 0.83 | 0.04 | 0.06 | 0.13 | 0.24 | 0.13 | 0.53 | 0.98 | 1.00 |      |
| 604.3  | 752   | 117407 | 0.04 | 0.07 | 0.16 | 0.30 | 0.04 | 0.07 | 0.18 | 0.30 | 0.03 | 0.04 | 0.06 | 0.10 | 0.06 | 0.19 | 0.59 | 0.91 |      |
| 605    | 482   | 117407 | 0.04 | 0.06 | 0.12 | 0.21 | 0.04 | 0.06 | 0.13 | 0.24 | 0.03 | 0.04 | 0.05 | 0.08 | 0.05 | 0.14 | 0.42 | 0.75 |      |
| 608    | 2620  | 117407 | 0.05 | 0.14 | 0.43 | 0.76 | 0.06 | 0.16 | 0.49 | 0.83 | 0.04 | 0.06 | 0.13 | 0.23 | 0.12 | 0.52 | 0.98 | 1.00 |      |
| 610    | 2479  | 116931 | 0.05 | 0.14 | 0.41 | 0.74 | 0.06 | 0.15 | 0.47 | 0.81 | 0.04 | 0.06 | 0.12 | 0.22 | 0.12 | 0.50 | 0.98 | 1.00 |      |
| 610.1  | 805   | 116931 | 0.04 | 0.07 | 0.17 | 0.32 | 0.04 | 0.07 | 0.19 | 0.37 | 0.03 | 0.04 | 0.07 | 0.10 | 0.07 | 0.20 | 0.62 | 0.92 |      |
| 610.2  | 275   | 116931 | 0.03 | 0.05 | 0.08 | 0.14 | 0.03 | 0.05 | 0.09 | 0.16 | 0.03 | 0.03 | 0.05 | 0.06 | 0.04 | 0.10 | 0.26 | 0.51 |      |
| 610.3  | 266   | 116931 | 0.03 | 0.05 | 0.08 | 0.13 | 0.03 | 0.05 | 0.09 | 0.15 | 0.03 | 0.03 | 0.05 | 0.06 | 0.04 | 0.10 | 0.25 | 0.50 |      |
| 610.4  | 1353  | 116931 | 0.04 | 0.09 | 0.25 | 0.49 | 0.05 | 0.10 | 0.29 | 0.56 | 0.03 | 0.05 | 0.09 | 0.14 | 0.08 | 0.31 | 0.83 | 0.99 |      |
| 610.8  | 644   | 116931 | 0.04 | 0.06 | 0.14 | 0.26 | 0.04 | 0.07 | 0.16 | 0.31 | 0.03 | 0.04 | 0.06 | 0.09 | 0.06 | 0.17 | 0.52 | 0.86 |      |
| 611    | 1363  | 234338 | 0.04 | 0.09 | 0.25 | 0.49 | 0.05 | 0.10 | 0.29 | 0.56 | 0.03 | 0.10 | 0.05 | 0.09 | 0.14 | 0.09 | 0.31 | 0.84 | 0.99 |
| 611.3  | 1305  | 234338 | 0.04 | 0.09 | 0.24 | 0.47 | 0.05 | 0.10 | 0.28 | 0.54 | 0.03 | 0.05 | 0.08 | 0.14 | 0.08 | 0.30 | 0.82 | 0.99 |      |
| 612    | 788   | 234338 | 0.04 | 0.07 | 0.16 | 0.31 | 0.04 | 0.08 | 0.19 | 0.36 | 0.03 | 0.04 | 0.07 | 0.10 | 0.07 | 0.20 | 0.61 | 0.92 |      |
| 612.2  | 715   | 234338 | 0.04 | 0.07 | 0.15 | 0.29 | 0.04 | 0.07 | 0.17 | 0.33 | 0.03 | 0.04 | 0.06 | 0.10 | 0.06 | 0.19 | 0.57 | 0.89 |      |
| 613    | 1712  | 234338 | 0.05 | 0.11 | 0.30 | 0.58 | 0.05 | 0.11 | 0.35 | 0.66 | 0.03 | 0.05 | 0.10 | 0.17 | 0.10 | 0.38 | 0.91 | 1.00 |      |
| 613.1  | 615   | 234338 | 0.04 | 0.06 | 0.14 | 0.26 | 0.04 | 0.07 | 0.16 | 0.30 | 0.03 | 0.04 | 0.06 | 0.09 | 0.06 | 0.17 | 0.51 | 0.84 |      |
| 613.7  | 614   | 234338 | 0.04 | 0.06 | 0.14 | 0.25 | 0.04 | 0.07 | 0.16 | 0.30 | 0.03 | 0.04 | 0.06 | 0.09 | 0.06 | 0.17 | 0.51 | 0.84 |      |
| 613.8  | 289   | 234338 | 0.03 | 0.05 | 0.09 | 0.14 | 0.03 | 0.05 | 0.10 | 0.16 | 0.03 | 0.03 | 0.05 | 0.06 | 0.05 | 0.10 | 0.27 | 0.53 |      |
| 614    | 5602  | 116931 | 0.07 | 0.25 | 0.73 | 0.97 | 0.08 | 0.29 | 0.80 | 0.99 | 0.04 | 0.09 | 0.22 | 0.43 | 0.21 | 0.83 | 1.00 | 1.00 |      |
| 614.1  | 2293  | 116931 | 0.05 | 0.13 | 0.38 | 0.70 | 0.06 | 0.15 | 0.44 | 0.78 | 0.04 | 0.06 | 0.12 | 0.21 | 0.11 | 0.47 | 0.97 | 1.00 |      |
| 614.3  | 802   | 116931 | 0.04 | 0.07 | 0.17 | 0.32 | 0.04 | 0.08 | 0.19 | 0.37 | 0.03 | 0.04 | 0.07 | 0.10 | 0.07 | 0.20 | 0.62 | 0.92 |      |
| 614.32 | 352   | 116931 | 0.03 | 0.05 | 0.10 | 0.16 | 0.03 | 0.05 | 0.11 | 0.19 | 0.03 | 0.04 | 0.05 | 0.07 | 0.05 | 0.11 | 0.32 | 0.61 |      |
| 614.33 | 308   | 116931 | 0.03 | 0.05 | 0.09 | 0.15 | 0.03 | 0.05 | 0.10 | 0.19 | 0.03 | 0.03 | 0.05 | 0.06 | 0.05 | 0.10 | 0.29 | 0.56 |      |
| 614.4  | 245   | 116931 | 0.03 | 0.05 |      |      |      |      |      |      |      |      |      |      |      |      |      |      |      |



|        |       |        |      |      |      |      |      |      |      |      |      |      |      |      |      |      |      |      |
|--------|-------|--------|------|------|------|------|------|------|------|------|------|------|------|------|------|------|------|------|
| 614.54 | 228   | 116931 | 0.03 | 0.04 | 0.08 | 0.12 | 0.03 | 0.05 | 0.08 | 0.14 | 0.03 | 0.03 | 0.04 | 0.06 | 0.04 | 0.09 | 0.22 | 0.44 |
| 615    | 3495  | 116931 | 0.06 | 0.17 | 0.53 | 0.86 | 0.07 | 0.20 | 0.61 | 0.92 | 0.04 | 0.07 | 0.16 | 0.30 | 0.15 | 0.64 | 1.00 | 1.00 |
| 617    | 1252  | 234338 | 0.04 | 0.09 | 0.23 | 0.46 | 0.05 | 0.10 | 0.27 | 0.53 | 0.03 | 0.05 | 0.08 | 0.14 | 0.08 | 0.29 | 0.80 | 0.99 |
| 618    | 10694 | 116931 | 0.10 | 0.41 | 0.93 | 1.00 | 0.11 | 0.47 | 0.97 | 1.00 | 0.05 | 0.12 | 0.36 | 0.68 | 0.35 | 0.98 | 1.00 | 1.00 |
| 618.1  | 6724  | 116931 | 0.08 | 0.29 | 0.80 | 0.99 | 0.09 | 0.33 | 0.86 | 0.99 | 0.04 | 0.09 | 0.25 | 0.49 | 0.25 | 0.89 | 1.00 | 1.00 |
| 618.2  | 4836  | 116931 | 0.07 | 0.22 | 0.67 | 0.95 | 0.08 | 0.26 | 0.74 | 0.97 | 0.04 | 0.08 | 0.20 | 0.38 | 0.19 | 0.78 | 1.00 | 1.00 |
| 618.5  | 459   | 116931 | 0.04 | 0.06 | 0.11 | 0.20 | 0.04 | 0.06 | 0.13 | 0.23 | 0.03 | 0.04 | 0.05 | 0.08 | 0.05 | 0.13 | 0.40 | 0.73 |
| 618.6  | 629   | 116931 | 0.04 | 0.06 | 0.14 | 0.26 | 0.04 | 0.07 | 0.16 | 0.30 | 0.03 | 0.04 | 0.06 | 0.09 | 0.06 | 0.17 | 0.51 | 0.85 |
| 619    | 8298  | 116931 | 0.09 | 0.34 | 0.87 | 1.00 | 0.10 | 0.39 | 0.92 | 1.00 | 0.05 | 0.11 | 0.30 | 0.57 | 0.29 | 0.94 | 1.00 | 1.00 |
| 619.1  | 683   | 116931 | 0.04 | 0.07 | 0.15 | 0.28 | 0.04 | 0.07 | 0.17 | 0.28 | 0.03 | 0.04 | 0.06 | 0.09 | 0.06 | 0.18 | 0.55 | 0.88 |
| 619.2  | 3020  | 116931 | 0.06 | 0.16 | 0.48 | 0.81 | 0.06 | 0.18 | 0.55 | 0.88 | 0.04 | 0.06 | 0.14 | 0.26 | 0.14 | 0.58 | 0.99 | 1.00 |
| 619.3  | 2536  | 116931 | 0.05 | 0.14 | 0.42 | 0.75 | 0.06 | 0.16 | 0.48 | 0.82 | 0.04 | 0.06 | 0.13 | 0.23 | 0.12 | 0.51 | 0.98 | 1.00 |
| 619.4  | 1535  | 116931 | 0.05 | 0.10 | 0.28 | 0.53 | 0.05 | 0.11 | 0.32 | 0.61 | 0.03 | 0.05 | 0.09 | 0.16 | 0.09 | 0.34 | 0.87 | 1.00 |
| 619.5  | 1209  | 116931 | 0.04 | 0.09 | 0.23 | 0.44 | 0.05 | 0.10 | 0.26 | 0.51 | 0.03 | 0.05 | 0.08 | 0.13 | 0.08 | 0.28 | 0.79 | 0.99 |
| 621    | 970   | 116931 | 0.04 | 0.08 | 0.19 | 0.37 | 0.04 | 0.09 | 0.22 | 0.43 | 0.03 | 0.04 | 0.07 | 0.11 | 0.07 | 0.24 | 0.70 | 0.96 |
| 622    | 9429  | 116931 | 0.10 | 0.37 | 0.91 | 1.00 | 0.11 | 0.43 | 0.95 | 1.00 | 0.05 | 0.12 | 0.33 | 0.63 | 0.32 | 0.96 | 1.00 | 1.00 |
| 622.1  | 6913  | 116931 | 0.08 | 0.29 | 0.81 | 0.99 | 0.09 | 0.34 | 0.87 | 1.00 | 0.04 | 0.10 | 0.26 | 0.50 | 0.25 | 0.90 | 1.00 | 1.00 |
| 622.2  | 2951  | 116931 | 0.06 | 0.15 | 0.47 | 0.81 | 0.06 | 0.18 | 0.54 | 0.81 | 0.04 | 0.18 | 0.06 | 0.14 | 0.13 | 0.57 | 0.99 | 1.00 |
| 623    | 1089  | 116931 | 0.04 | 0.08 | 0.21 | 0.41 | 0.04 | 0.09 | 0.24 | 0.47 | 0.03 | 0.05 | 0.08 | 0.12 | 0.08 | 0.26 | 0.75 | 0.98 |
| 624    | 805   | 116931 | 0.04 | 0.07 | 0.17 | 0.32 | 0.04 | 0.08 | 0.19 | 0.37 | 0.03 | 0.04 | 0.07 | 0.10 | 0.07 | 0.20 | 0.62 | 0.92 |
| 624.1  | 254   | 116931 | 0.03 | 0.05 | 0.08 | 0.13 | 0.03 | 0.05 | 0.09 | 0.15 | 0.03 | 0.03 | 0.04 | 0.06 | 0.04 | 0.09 | 0.25 | 0.48 |
| 624.2  | 440   | 116931 | 0.03 | 0.06 | 0.11 | 0.20 | 0.04 | 0.06 | 0.12 | 0.20 | 0.03 | 0.06 | 0.04 | 0.05 | 0.05 | 0.13 | 0.39 | 0.71 |
| 624.9  | 5074  | 116931 | 0.07 | 0.23 | 0.69 | 0.96 | 0.08 | 0.27 | 0.76 | 0.98 | 0.04 | 0.08 | 0.20 | 0.40 | 0.20 | 0.79 | 1.00 | 1.00 |
| 625    | 2526  | 116931 | 0.05 | 0.14 | 0.41 | 0.74 | 0.06 | 0.16 | 0.48 | 0.81 | 0.04 | 0.06 | 0.12 | 0.23 | 0.12 | 0.51 | 0.98 | 1.00 |
| 625.1  | 1007  | 116931 | 0.04 | 0.08 | 0.20 | 0.38 | 0.04 | 0.09 | 0.23 | 0.44 | 0.03 | 0.04 | 0.07 | 0.12 | 0.07 | 0.24 | 0.71 | 0.97 |
| 626    | 15577 | 116931 | 0.13 | 0.54 | 0.98 | 1.00 | 0.14 | 0.61 | 0.99 | 1.00 | 0.06 | 0.16 | 0.48 | 0.82 | 0.46 | 1.00 | 1.00 | 1.00 |
| 626.1  | 13278 | 116931 | 0.12 | 0.48 | 0.97 | 1.00 | 0.13 | 0.55 | 0.99 | 1.00 | 0.05 | 0.14 | 0.43 | 0.76 | 0.41 | 0.99 | 1.00 | 1.00 |
| 626.12 | 8228  | 116931 | 0.09 | 0.34 | 0.87 | 1.00 | 0.10 | 0.39 | 0.92 | 1.00 | 0.05 | 0.11 | 0.30 | 0.57 | 0.29 | 0.94 | 1.00 | 1.00 |
| 626.13 | 1646  | 116931 | 0.05 | 0.10 | 0.29 | 0.56 | 0.05 | 0.12 | 0.34 | 0.64 | 0.03 | 0.05 | 0.10 | 0.16 | 0.09 | 0.36 | 0.90 | 1.00 |
| 626.14 | 3244  | 116931 | 0.06 | 0.16 | 0.50 | 0.84 | 0.06 | 0.19 | 0.58 | 0.90 | 0.04 | 0.07 | 0.15 | 0.28 | 0.14 | 0.61 | 0.99 | 1.00 |
| 626.2  | 1487  | 116931 | 0.05 | 0.10 | 0.27 | 0.52 | 0.05 | 0.11 | 0.31 | 0.60 | 0.03 | 0.05 | 0.09 | 0.15 | 0.09 | 0.33 | 0.86 | 1.00 |
| 626.8  | 1139  | 116931 | 0.04 | 0.09 | 0.22 | 0.42 | 0.04 | 0.09 | 0.25 | 0.49 | 0.03 | 0.05 | 0.08 | 0.13 | 0.08 | 0.27 | 0.76 | 0.98 |
| 627    | 9346  | 116931 | 0.10 | 0.37 | 0.90 | 1.00 | 0.11 | 0.43 | 0.95 | 1.00 | 0.05 | 0.11 | 0.33 | 0.62 | 0.32 | 0.96 | 1.00 | 1.00 |
| 627.1  | 7915  | 116931 | 0.09 | 0.33 | 0.85 | 0.99 | 0.10 | 0.38 | 0.91 | 1.00 | 0.05 | 0.10 | 0.29 | 0.56 | 0.28 | 0.93 | 1.00 | 1.00 |
| 627.3  | 1078  | 116931 | 0.04 | 0.08 | 0.21 | 0.40 | 0.04 | 0.08 | 0.24 | 0.47 | 0.03 | 0.05 | 0.08 | 0.12 | 0.08 | 0.26 | 0.74 | 0.97 |
| 627.4  | 252   | 116931 | 0.03 | 0.05 | 0.08 | 0.13 | 0.03 | 0.05 | 0.09 | 0.15 | 0.03 | 0.03 | 0.04 | 0.06 | 0.04 | 0.09 | 0.24 | 0.48 |
| 628    | 4147  | 116931 | 0.06 | 0.20 | 0.60 | 0.91 | 0.07 | 0.23 | 0.68 | 0.95 | 0.04 | 0.07 | 0.18 | 0.34 | 0.17 | 0.71 | 1.00 | 1.00 |
| 634    | 4525  | 169668 | 0.07 | 0.21 | 0.64 | 0.94 | 0.07 | 0.25 | 0.72 | 0.97 | 0.04 | 0.08 | 0.19 | 0.37 | 0.18 | 0.75 | 1.00 | 1.00 |
| 634.1  | 1038  | 169668 | 0.04 | 0.08 | 0.20 | 0.39 | 0.04 | 0.09 | 0.23 | 0.45 | 0.03 | 0.04 | 0.08 | 0.12 | 0.07 | 0.25 | 0.73 | 0.97 |
| 634.3  | 272   | 169668 | 0.03 | 0.05 | 0.08 | 0.14 | 0.03 | 0.05 | 0.09 | 0.16 | 0.03 | 0.03 | 0.05 | 0.06 | 0.04 | 0.10 | 0.26 | 0.51 |
| 635    | 1680  | 169668 | 0.05 | 0.11 | 0.30 | 0.57 | 0.05 | 0.12 | 0.35 | 0.65 | 0.03 | 0.05 | 0.10 | 0.17 | 0.10 | 0.37 | 0.90 | 1.00 |
| 635.2  | 739   | 169668 | 0.04 | 0.07 | 0.16 | 0.30 | 0.04 | 0.07 | 0.18 | 0.34 | 0.03 | 0.04 | 0.06 | 0.10 | 0.06 | 0.19 | 0.58 | 0.90 |
| 635.3  | 1054  | 169668 | 0.04 | 0.08 | 0.20 | 0.40 | 0.04 | 0.09 | 0.24 | 0.46 | 0.03 | 0.04 | 0.08 | 0.12 | 0.07 | 0.25 | 0.73 | 0.97 |
| 636    | 2079  | 169668 | 0.05 | 0.12 | 0.36 | 0.66 | 0.05 | 0.14 | 0.41 | 0.74 | 0.03 | 0.06 | 0.11 | 0.20 | 0.11 | 0.44 | 0.95 | 1.00 |
| 636.2  | 508   | 169668 | 0.04 | 0.06 | 0.12 | 0.22 | 0.04 | 0.06 | 0.14 | 0.25 | 0.03 | 0.04 | 0.06 | 0.08 | 0.05 | 0.14 | 0.44 | 0.77 |
| 636.3  | 872   | 169668 | 0.04 | 0.07 | 0.18 | 0.34 | 0.04 | 0.08 | 0.20 | 0.39 | 0.03 | 0.04 | 0.07 | 0.11 | 0.07 | 0.22 | 0.65 | 0.94 |
| 642    | 946   | 169668 | 0.04 | 0.08 | 0.19 | 0.36 | 0.04 | 0.08 | 0.22 | 0.42 | 0.03 | 0.04 | 0.07 | 0.11 | 0.07 | 0.23 | 0.69 | 0.96 |
| 642.1  | 259   | 169668 | 0.03 | 0.05 | 0.08 | 0.13 | 0.03 | 0.05 | 0.09 | 0.15 | 0.03 | 0.03 | 0.04 | 0.06 | 0.04 | 0.09 | 0.25 | 0.49 |
| 644    | 677   | 169668 | 0.04 | 0.07 | 0.15 | 0.28 | 0.04 | 0.07 | 0.17 | 0.32 | 0.03 | 0.04 | 0.06 | 0.09 | 0.06 | 0.18 | 0.55 | 0.87 |
| 645    | 1054  | 325859 | 0.04 | 0.08 | 0.20 | 0.40 | 0.04 | 0.09 | 0.24 | 0.46 | 0.03 | 0.04 | 0.08 | 0.12 | 0.07 | 0.25 | 0.73 | 0.97 |
| 646    | 1868  | 169668 | 0.05 | 0.11 | 0.33 | 0.62 | 0.05 | 0.13 | 0.38 | 0.69 | 0.03 | 0.05 | 0.10 | 0.18 | 0.10 | 0.40 | 0.93 | 1.00 |
| 647.1  | 226   | 169668 | 0.03 | 0.04 | 0.08 | 0.12 | 0.03 | 0.05 | 0.08 | 0.14 | 0.03 | 0.03 | 0.04 | 0.06 | 0.04 | 0.09 | 0.22 | 0.44 |
| 650    | 1568  | 325859 | 0.05 | 0.10 | 0.28 | 0.55 | 0.05 | 0.11 | 0.33 | 0.62 | 0.03 | 0.05 | 0.09 | 0.16 | 0.09 | 0.35 | 0.88 | 1.00 |
| 651    | 299   | 325859 | 0.03 | 0.05 | 0.09 | 0.15 | 0.03 | 0.05 | 0.10 | 0.17 | 0.03 | 0.03 | 0.05 | 0.06 | 0.05 | 0.10 | 0.28 | 0.54 |
| 652    | 1428  | 325859 | 0.04 | 0.10 | 0.26 | 0.51 | 0.05 | 0.11 | 0.30 | 0.58 | 0.03 | 0.05 | 0.09 | 0.15 | 0.09 | 0.32 | 0.85 | 0.99 |
| 653    | 1257  | 169668 | 0.04 | 0.09 | 0.24 | 0.46 | 0.05 | 0.10 | 0.27 | 0.53 | 0.03 | 0.05 | 0.08 | 0.14 | 0.08 | 0.29 | 0.81 | 0.99 |
| 654.1  | 1034  | 169668 | 0.04 | 0.08 | 0.20 | 0.39 | 0.04 | 0.09 | 0.23 | 0.39 | 0.03 | 0.04 | 0.08 | 0.12 | 0.07 | 0.25 | 0.73 | 0.97 |
| 654.2  | 258   | 169668 | 0.03 | 0.05 | 0.08 | 0.13 | 0.03 | 0.05 | 0.09 | 0.15 | 0.03 | 0.03 | 0.04 | 0.06 | 0.04 | 0.09 | 0.25 | 0.48 |
| 655    | 3585  | 169668 | 0.06 | 0.18 | 0.55 | 0.88 | 0.07 | 0.20 | 0.62 | 0.93 | 0.04 | 0.07 | 0.16 | 0.30 | 0.16 | 0.66 | 1.00 | 1.00 |
| 656    | 499   | 325859 | 0.04 | 0.06 | 0.12 | 0.22 | 0.04 | 0.06 | 0.13 | 0.25 | 0.03 | 0.04 | 0.06 | 0.08 | 0.05 | 0.14 | 0.43 | 0.76 |
| 661    | 1819  | 325859 | 0.05 | 0.11 | 0.32 | 0.61 | 0.05 | 0.13 | 0.37 | 0.69 | 0.03 | 0.05 | 0.10 | 0.18 | 0.10 | 0.40 | 0.92 | 1.00 |
| 663    | 511   | 325859 | 0.04 | 0.06 | 0.12 | 0.22 | 0.04 | 0.06 | 0.14 | 0.25 | 0.03 | 0.04 | 0.06 | 0.08 | 0.05 | 0.14 | 0.44 | 0.77 |
| 665    | 4394  | 325859 | 0.07 | 0.21 | 0.64 | 0.93 | 0.07 | 0.24 | 0.71 | 0.97 | 0.04 | 0.08 | 0.19 | 0.36 | 0.18 | 0.75 | 1.00 | 1.00 |
| 669    | 2212  | 169668 | 0.05 | 0.13 | 0.37 | 0.69 | 0.05 | 0.14 | 0.43 | 0.77 | 0.04 | 0.06 | 0.12 | 0.21 | 0.11 | 0.46 | 0.96 | 1.00 |
| 674    | 217   | 169668 | 0.03 | 0.04 | 0.07 | 0.12 | 0.03 | 0.05 | 0.08 | 0.13 | 0.03 | 0.03 | 0.04 | 0.05 | 0.04 | 0.08 | 0.22 | 0.42 |
| 681    | 7381  | 289596 | 0.09 | 0.32 | 0.84 | 0.99 | 0.10 | 0.37 | 0.90 | 1.00 | 0.05 | 0.10 | 0.28 | 0.54 | 0.27 | 0.92 | 1.00 | 1.00 |
| 681.1  | 550   | 289596 | 0.04 | 0.06 | 0.13 | 0.23 | 0.04 | 0.07 | 0.14 | 0.27 | 0.03 | 0.04 | 0.06 | 0.08 | 0.06 | 0.15 | 0.46 | 0.80 |
| 681.2  | 509   | 289596 | 0.04 | 0.06 | 0.12 | 0.22 | 0.04 | 0.06 | 0.14 | 0.25 | 0.03 | 0.04 | 0.06 | 0.08 | 0.05 | 0.14 | 0.44 | 0.77 |
| 681.3  | 5521  | 289596 | 0.07 | 0.25 | 0.73 | 0.97 | 0.08 | 0.29 | 0.80 | 0.99 | 0.04 | 0.09 | 0.22 | 0.44 | 0.22 | 0.84 | 1.00 | 1.00 |
| 681.5  | 5524  | 289596 | 0.07 | 0.25 | 0.73 | 0.97 | 0.08 |      |      |      |      |      |      |      |      |      |      |      |

|        |       |        |      |      |      |      |        |      |      |      |      |      |      |      |      |      |      |      |
|--------|-------|--------|------|------|------|------|--------|------|------|------|------|------|------|------|------|------|------|------|
| 686.3  | 510   | 289596 | 0.04 | 0.06 | 0.12 | 0.22 | 0.04   | 0.06 | 0.14 | 0.25 | 0.03 | 0.04 | 0.06 | 0.08 | 0.05 | 0.14 | 0.44 | 0.77 |
| 686.4  | 337   | 289596 | 0.03 | 0.05 | 0.09 | 0.16 | 0.03   | 0.05 | 0.10 | 0.18 | 0.03 | 0.04 | 0.05 | 0.07 | 0.05 | 0.11 | 0.31 | 0.59 |
| 687    | 1302  | 289596 | 0.04 | 0.09 | 0.24 | 0.47 | 0.05   | 0.10 | 0.28 | 0.54 | 0.03 | 0.05 | 0.08 | 0.14 | 0.08 | 0.30 | 0.82 | 0.99 |
| 687.1  | 2100  | 289596 | 0.05 | 0.12 | 0.36 | 0.67 | 0.05   | 0.14 | 0.42 | 0.75 | 0.04 | 0.06 | 0.11 | 0.20 | 0.11 | 0.45 | 0.95 | 1.00 |
| 687.2  | 947   | 289596 | 0.04 | 0.08 | 0.19 | 0.37 | 0.04   | 0.09 | 0.22 | 0.37 | 0.03 | 0.04 | 0.07 | 0.11 | 0.07 | 0.23 | 0.69 | 0.96 |
| 687.4  | 2787  | 289596 | 0.06 | 0.15 | 0.45 | 0.79 | 0.06   | 0.17 | 0.52 | 0.85 | 0.04 | 0.06 | 0.13 | 0.25 | 0.13 | 0.55 | 0.99 | 1.00 |
| 689    | 5767  | 289596 | 0.08 | 0.26 | 0.75 | 0.98 | 0.08   | 0.30 | 0.82 | 0.99 | 0.04 | 0.09 | 0.23 | 0.45 | 0.22 | 0.85 | 1.00 | 1.00 |
| 690    | 3042  | 289596 | 0.06 | 0.16 | 0.49 | 0.82 | 0.06   | 0.18 | 0.56 | 0.88 | 0.04 | 0.07 | 0.14 | 0.27 | 0.14 | 0.59 | 0.99 | 1.00 |
| 690.1  | 3024  | 289596 | 0.06 | 0.16 | 0.48 | 0.82 | 0.06   | 0.18 | 0.55 | 0.88 | 0.04 | 0.06 | 0.14 | 0.27 | 0.14 | 0.59 | 0.99 | 1.00 |
| 694    | 952   | 289596 | 0.04 | 0.08 | 0.19 | 0.37 | 0.04   | 0.09 | 0.22 | 0.42 | 0.03 | 0.04 | 0.07 | 0.11 | 0.07 | 0.23 | 0.69 | 0.96 |
| 694.2  | 762   | 289596 | 0.04 | 0.07 | 0.16 | 0.30 | 0.04   | 0.08 | 0.18 | 0.35 | 0.03 | 0.04 | 0.07 | 0.10 | 0.06 | 0.20 | 0.60 | 0.91 |
| 695    | 2344  | 289596 | 0.05 | 0.13 | 0.39 | 0.72 | 0.06   | 0.15 | 0.45 | 0.79 | 0.04 | 0.06 | 0.12 | 0.22 | 0.12 | 0.49 | 0.97 | 1.00 |
| 695.3  | 312   | 289596 | 0.03 | 0.05 | 0.09 | 0.15 | 0.03   | 0.05 | 0.10 | 0.17 | 0.03 | 0.03 | 0.05 | 0.06 | 0.05 | 0.10 | 0.29 | 0.56 |
| 695.4  | 391   | 288757 | 0.03 | 0.05 | 0.10 | 0.18 | 0.04   | 0.06 | 0.11 | 0.20 | 0.03 | 0.06 | 0.04 | 0.05 | 0.05 | 0.12 | 0.35 | 0.66 |
| 695.42 | 324   | 288757 | 0.03 | 0.05 | 0.09 | 0.16 | 0.03   | 0.05 | 0.10 | 0.18 | 0.03 | 0.03 | 0.05 | 0.06 | 0.05 | 0.11 | 0.30 | 0.58 |
| 695.7  | 724   | 289596 | 0.04 | 0.07 | 0.15 | 0.29 | 0.04   | 0.07 | 0.18 | 0.34 | 0.03 | 0.04 | 0.06 | 0.10 | 0.06 | 0.19 | 0.57 | 0.90 |
| 695.8  | 231   | 289596 | 0.03 | 0.05 | 0.08 | 0.12 | 0.03   | 0.05 | 0.08 | 0.14 | 0.03 | 0.03 | 0.04 | 0.06 | 0.04 | 0.09 | 0.23 | 0.44 |
| 695.9  | 486   | 289596 | 0.04 | 0.06 | 0.12 | 0.21 | 0.04   | 0.06 | 0.12 | 0.24 | 0.03 | 0.04 | 0.05 | 0.08 | 0.05 | 0.14 | 0.42 | 0.75 |
| 696    | 2369  | 286399 | 0.05 | 0.13 | 0.40 | 0.72 | 0.06   | 0.15 | 0.46 | 0.80 | 0.04 | 0.06 | 0.12 | 0.22 | 0.12 | 0.49 | 0.97 | 1.00 |
| 696.4  | 2308  | 286399 | 0.05 | 0.13 | 0.39 | 0.71 | 0.06   | 0.15 | 0.45 | 0.78 | 0.04 | 0.06 | 0.12 | 0.21 | 0.12 | 0.48 | 0.97 | 1.00 |
| 696.41 | 1756  | 286399 | 0.05 | 0.11 | 0.31 | 0.59 | 0.05   | 0.12 | 0.36 | 0.67 | 0.03 | 0.05 | 0.10 | 0.17 | 0.10 | 0.39 | 0.92 | 1.00 |
| 696.42 | 711   | 286399 | 0.04 | 0.07 | 0.15 | 0.29 | 0.04   | 0.07 | 0.17 | 0.33 | 0.03 | 0.04 | 0.06 | 0.10 | 0.06 | 0.18 | 0.57 | 0.89 |
| 697    | 522   | 289596 | 0.04 | 0.06 | 0.12 | 0.22 | 0.04   | 0.06 | 0.14 | 0.26 | 0.03 | 0.04 | 0.06 | 0.08 | 0.06 | 0.15 | 0.45 | 0.78 |
| 698    | 767   | 289596 | 0.04 | 0.07 | 0.16 | 0.31 | 0.04   | 0.08 | 0.18 | 0.36 | 0.03 | 0.04 | 0.07 | 0.10 | 0.06 | 0.20 | 0.60 | 0.91 |
| 700    | 280   | 289596 | 0.03 | 0.05 | 0.08 | 0.14 | 0.03   | 0.05 | 0.09 | 0.16 | 0.03 | 0.03 | 0.05 | 0.06 | 0.05 | 0.10 | 0.27 | 0.52 |
| 701    | 4868  | 289596 | 0.07 | 0.23 | 0.68 | 0.95 | 0.08   | 0.26 | 0.75 | 0.98 | 0.04 | 0.08 | 0.20 | 0.39 | 0.20 | 0.79 | 1.00 | 1.00 |
| 701.2  | 2159  | 289596 | 0.05 | 0.13 | 0.37 | 0.68 | 0.05   | 0.13 | 0.43 | 0.76 | 0.04 | 0.14 | 0.06 | 0.11 | 0.11 | 0.46 | 0.96 | 1.00 |
| 701.3  | 478   | 289596 | 0.04 | 0.06 | 0.12 | 0.21 | 0.04   | 0.06 | 0.13 | 0.24 | 0.03 | 0.04 | 0.05 | 0.08 | 0.05 | 0.14 | 0.41 | 0.74 |
| 701.4  | 205   | 289596 | 0.03 | 0.04 | 0.07 | 0.11 | 0.03   | 0.05 | 0.08 | 0.13 | 0.03 | 0.03 | 0.04 | 0.05 | 0.04 | 0.08 | 0.21 | 0.40 |
| 701.5  | 447   | 289596 | 0.04 | 0.06 | 0.11 | 0.20 | 0.04   | 0.06 | 0.12 | 0.23 | 0.03 | 0.04 | 0.05 | 0.07 | 0.05 | 0.13 | 0.39 | 0.72 |
| 702    | 5494  | 289596 | 0.07 | 0.25 | 0.73 | 0.97 | 0.08   | 0.29 | 0.80 | 0.99 | 0.04 | 0.09 | 0.22 | 0.43 | 0.22 | 0.83 | 1.00 | 1.00 |
| 702.1  | 2726  | 289596 | 0.06 | 0.15 | 0.44 | 0.78 | 0.06   | 0.17 | 0.51 | 0.85 | 0.04 | 0.06 | 0.13 | 0.24 | 0.13 | 0.55 | 0.99 | 1.00 |
| 702.2  | 2973  | 289596 | 0.06 | 0.16 | 0.48 | 0.81 | 0.06   | 0.18 | 0.55 | 0.88 | 0.04 | 0.06 | 0.14 | 0.26 | 0.14 | 0.58 | 0.99 | 1.00 |
| 703    | 345   | 289596 | 0.03 | 0.05 | 0.10 | 0.16 | 0.03   | 0.05 | 0.11 | 0.19 | 0.03 | 0.04 | 0.05 | 0.07 | 0.05 | 0.11 | 0.32 | 0.60 |
| 703.1  | 837   | 289596 | 0.04 | 0.07 | 0.17 | 0.33 | 0.04   | 0.08 | 0.20 | 0.38 | 0.03 | 0.04 | 0.07 | 0.10 | 0.07 | 0.21 | 0.64 | 0.93 |
| 704    | 4724  | 289596 | 0.07 | 0.22 | 0.67 | 0.95 | 0.08   | 0.26 | 0.74 | 0.97 | 0.04 | 0.08 | 0.20 | 0.38 | 0.19 | 0.78 | 1.00 | 1.00 |
| 705.8  | 569   | 289596 | 0.04 | 0.06 | 0.13 | 0.24 | 0.04   | 0.07 | 0.15 | 0.28 | 0.03 | 0.04 | 0.06 | 0.08 | 0.06 | 0.16 | 0.48 | 0.81 |
| 706    | 7950  | 289596 | 0.09 | 0.34 | 0.87 | 1.00 | 0.10   | 0.39 | 0.92 | 1.00 | 0.05 | 0.11 | 0.30 | 0.57 | 0.29 | 0.94 | 1.00 | 1.00 |
| 706.2  | 7878  | 289596 | 0.09 | 0.34 | 0.87 | 1.00 | 0.10   | 0.39 | 0.92 | 1.00 | 0.05 | 0.11 | 0.30 | 0.57 | 0.29 | 0.94 | 1.00 | 1.00 |
| 707    | 2310  | 289596 | 0.05 | 0.13 | 0.39 | 0.71 | 0.06   | 0.15 | 0.45 | 0.79 | 0.04 | 0.15 | 0.06 | 0.12 | 0.12 | 0.48 | 0.97 | 1.00 |
| 707.1  | 1184  | 289596 | 0.04 | 0.09 | 0.22 | 0.44 | 0.04   | 0.10 | 0.26 | 0.50 | 0.03 | 0.05 | 0.08 | 0.13 | 0.08 | 0.28 | 0.78 | 0.98 |
| 707.2  | 1199  | 289596 | 0.04 | 0.09 | 0.23 | 0.44 | 0.05   | 0.10 | 0.26 | 0.51 | 0.03 | 0.05 | 0.08 | 0.13 | 0.08 | 0.28 | 0.79 | 0.99 |
| 709    | 3306  | 289596 | 0.06 | 0.17 | 0.52 | 0.85 | 0.06   | 0.19 | 0.59 | 0.91 | 0.04 | 0.07 | 0.15 | 0.29 | 0.15 | 0.63 | 1.00 | 1.00 |
| 709.2  | 512   | 289596 | 0.04 | 0.06 | 0.12 | 0.22 | 0.04   | 0.06 | 0.14 | 0.22 | 0.03 | 0.06 | 0.04 | 0.06 | 0.05 | 0.15 | 0.44 | 0.77 |
| 709.7  | 2592  | 289596 | 0.05 | 0.14 | 0.43 | 0.76 | 0.06   | 0.16 | 0.49 | 0.83 | 0.04 | 0.06 | 0.13 | 0.23 | 0.12 | 0.53 | 0.98 | 1.00 |
| 710    | 620   | 295120 | 0.04 | 0.06 | 0.14 | 0.26 | 0.04   | 0.07 | 0.16 | 0.30 | 0.03 | 0.04 | 0.06 | 0.09 | 0.06 | 0.17 | 0.51 | 0.85 |
| 710.1  | 602   | 295120 | 0.04 | 0.06 | 0.14 | 0.25 | 0.04   | 0.07 | 0.15 | 0.29 | 0.03 | 0.04 | 0.06 | 0.09 | 0.06 | 0.16 | 0.50 | 0.84 |
| 710.19 | 444   | 295120 | 0.03 | 0.06 | 0.11 | 0.20 | 0.04   | 0.06 | 0.12 | 0.20 | 0.03 | 0.04 | 0.05 | 0.07 | 0.05 | 0.13 | 0.39 | 0.71 |
| 711    | 433   | 295120 | 0.03 | 0.06 | 0.11 | 0.19 | 0.04   | 0.06 | 0.12 | 0.22 | 0.03 | 0.04 | 0.05 | 0.07 | 0.05 | 0.13 | 0.38 | 0.70 |
| 711.1  | 333   | 295120 | 0.03 | 0.05 | 0.09 | 0.16 | 0.03   | 0.05 | 0.10 | 0.18 | 0.03 | 0.04 | 0.05 | 0.06 | 0.05 | 0.11 | 0.31 | 0.59 |
| 714    | 4896  | 294409 | 0.07 | 0.23 | 0.68 | 0.95 | 0.08   | 0.26 | 0.76 | 0.98 | 0.04 | 0.08 | 0.20 | 0.40 | 0.20 | 0.79 | 1.00 | 1.00 |
| 714.1  | 4369  | 294409 | 0.07 | 0.21 | 0.63 | 0.93 | 0.07   | 0.24 | 0.71 | 0.96 | 0.04 | 0.08 | 0.19 | 0.36 | 0.18 | 0.75 | 1.00 | 1.00 |
| 715    | 1641  | 294409 | 0.05 | 0.11 | 0.29 | 0.57 | 0.05   | 0.12 | 0.34 | 0.64 | 0.03 | 0.05 | 0.10 | 0.17 | 0.09 | 0.36 | 0.90 | 1.00 |
| 715.2  | 399   | 294409 | 0.03 | 0.05 | 0.10 | 0.18 | 0.04   | 0.06 | 0.12 | 0.21 | 0.03 | 0.04 | 0.05 | 0.07 | 0.05 | 0.12 | 0.36 | 0.67 |
| 716    | 38203 | 295120 | 0.25 | 0.90 | 1.00 | 1.00 | 0.29   | 0.94 | 1.00 | 1.00 | 0.09 | 0.32 | 0.85 | 0.99 | 0.84 | 1.00 | 1.00 | 1.00 |
| 716.2  | 16046 | 295120 | 0.14 | 0.58 | 0.99 | 1.00 | 0.15   | 0.66 | 1.00 | 1.00 | 0.06 | 0.17 | 0.52 | 0.85 | 0.50 | 1.00 | 1.00 | 1.00 |
| 716.9  | 38053 | 295120 | 0.25 | 0.90 | 1.00 | 1.00 | 0.29   | 0.94 | 1.00 | 1.00 | 0.09 | 0.32 | 0.85 | 0.99 | 0.83 | 1.00 | 1.00 | 1.00 |
| 717    | 1354  | 336121 | 0.04 | 0.09 | 0.25 | 0.49 | 0.05   | 0.10 | 0.29 | 0.56 | 0.03 | 0.05 | 0.09 | 0.14 | 0.08 | 0.31 | 0.83 | 0.99 |
| 720    | 4105  | 322347 | 0.07 | 0.20 | 0.61 | 0.92 | 0.07   | 0.23 | 0.68 | 0.96 | 0.04 | 0.07 | 0.18 | 0.34 | 0.17 | 0.72 | 1.00 | 1.00 |
| 721    | 8311  | 322347 | 0.09 | 0.35 | 0.88 | 1.00 | 0.10   | 0.41 | 0.93 | 1.00 | 0.05 | 0.11 | 0.31 | 0.59 | 0.30 | 0.95 | 1.00 | 1.00 |
| 721.1  | 7917  | 322347 | 0.09 | 0.34 | 0.87 | 1.00 | 0.10   | 0.39 | 0.92 | 1.00 | 0.05 | 0.11 | 0.30 | 0.57 | 0.29 | 0.94 | 1.00 | 1.00 |
| 721.2  | 204   | 322347 | 0.03 | 0.04 | 0.07 | 0.11 | 0.03   | 0.05 | 0.08 | 0.13 | 0.03 | 0.03 | 0.04 | 0.05 | 0.04 | 0.08 | 0.21 | 0.40 |
| 721.8  | 384   | 322347 | 0.03 | 0.05 | 0.10 | 0.18 | 0.04   | 0.06 | 0.11 | 0.20 | 0.03 | 0.04 | 0.05 | 0.07 | 0.05 | 0.12 | 0.35 | 0.65 |
| 722    | 6764  | 322347 | 0.08 | 0.30 | 0.81 | 0.99 | 0.09   | 0.34 | 0.88 | 1.00 | 0.05 | 0.10 | 0.26 | 0.51 | 0.25 | 0.90 | 1.00 | 1.00 |
| 722.1  | 495   | 322347 | 0.04 | 0.06 | 0.12 | 0.21 | 0.04   | 0.06 | 0.13 | 0.25 | 0.03 | 0.04 | 0.05 | 0.08 | 0.05 | 0.14 | 0.43 | 0.76 |
| 722.6  | 2865  | 322347 | 0.06 | 0.15 | 0.46 | 0.80 | 0.06   | 0.17 | 0.53 | 0.86 | 0.04 | 0.06 | 0.14 | 0.25 | 0.13 | 0.57 | 0.99 | 1.00 |
| 722.7  | 398   | 322347 | 0.03 | 0.05 | 0.10 | 0.18 | 0.04   | 0.06 | 0.12 | 0.21 | 0.03 | 0.04 | 0.05 | 0.07 | 0.05 | 0.12 | 0.36 | 0.67 |
| 722.9  | 4097  | 322347 | 0.06 | 0.20 | 0.61 | 0.92 | 0.07   | 0.23 | 0.68 | 0.95 | 0.04 | 0.07 | 0.18 | 0.34 | 0.17 | 0.72 | 1.00 | 1.00 |
| 723    | 537   | 322347 | 0.04 | 0.06 | 0.13 | 0.23 | 0.04   | 0.06 | 0.14 | 0.26 | 0.03 | 0.04 | 0.06 | 0.08 | 0.06 | 0.15 | 0.46 | 0.79 |
| 724    | 1156  | 322347 | 0.04 | 0.09 | 0.22 | 0.43 | 0.04</ |      |      |      |      |      |      |      |      |      |      |      |

|        |       |        |      |      |      |      |      |      |      |      |      |      |      |      |      |      |      |      |
|--------|-------|--------|------|------|------|------|------|------|------|------|------|------|------|------|------|------|------|------|
| 726.1  | 9643  | 306383 | 0.10 | 0.40 | 0.92 | 1.00 | 0.11 | 0.46 | 0.96 | 1.00 | 0.05 | 0.12 | 0.35 | 0.66 | 0.34 | 0.97 | 1.00 | 1.00 |
| 726.2  | 527   | 306383 | 0.04 | 0.06 | 0.12 | 0.23 | 0.04 | 0.06 | 0.14 | 0.26 | 0.03 | 0.04 | 0.06 | 0.08 | 0.06 | 0.15 | 0.45 | 0.78 |
| 726.3  | 822   | 306383 | 0.04 | 0.07 | 0.17 | 0.32 | 0.04 | 0.08 | 0.19 | 0.38 | 0.03 | 0.04 | 0.07 | 0.10 | 0.07 | 0.21 | 0.63 | 0.93 |
| 726.4  | 3462  | 306383 | 0.06 | 0.17 | 0.54 | 0.87 | 0.07 | 0.20 | 0.61 | 0.92 | 0.04 | 0.07 | 0.16 | 0.30 | 0.15 | 0.65 | 1.00 | 1.00 |
| 727    | 12755 | 306383 | 0.12 | 0.49 | 0.97 | 1.00 | 0.13 | 0.56 | 0.97 | 1.00 | 0.05 | 0.14 | 0.44 | 0.77 | 0.42 | 0.99 | 1.00 | 1.00 |
| 727.1  | 5004  | 306383 | 0.07 | 0.23 | 0.69 | 0.96 | 0.08 | 0.27 | 0.77 | 0.98 | 0.04 | 0.08 | 0.21 | 0.40 | 0.20 | 0.80 | 1.00 | 1.00 |
| 727.4  | 2903  | 306383 | 0.06 | 0.15 | 0.47 | 0.80 | 0.06 | 0.18 | 0.54 | 0.87 | 0.04 | 0.06 | 0.14 | 0.26 | 0.13 | 0.57 | 0.99 | 1.00 |
| 727.5  | 587   | 306383 | 0.04 | 0.06 | 0.13 | 0.25 | 0.04 | 0.07 | 0.15 | 0.28 | 0.03 | 0.04 | 0.06 | 0.09 | 0.06 | 0.16 | 0.49 | 0.83 |
| 727.6  | 3877  | 306383 | 0.06 | 0.19 | 0.58 | 0.90 | 0.07 | 0.22 | 0.66 | 0.94 | 0.04 | 0.07 | 0.17 | 0.33 | 0.17 | 0.69 | 1.00 | 1.00 |
| 728    | 832   | 306383 | 0.04 | 0.07 | 0.17 | 0.33 | 0.04 | 0.07 | 0.20 | 0.38 | 0.03 | 0.08 | 0.04 | 0.07 | 0.07 | 0.21 | 0.63 | 0.93 |
| 728.2  | 402   | 306383 | 0.03 | 0.05 | 0.10 | 0.18 | 0.04 | 0.06 | 0.12 | 0.21 | 0.03 | 0.04 | 0.05 | 0.07 | 0.05 | 0.12 | 0.36 | 0.67 |
| 728.7  | 3729  | 306383 | 0.06 | 0.19 | 0.57 | 0.89 | 0.07 | 0.21 | 0.64 | 0.94 | 0.04 | 0.07 | 0.17 | 0.32 | 0.16 | 0.68 | 1.00 | 1.00 |
| 728.71 | 3406  | 306383 | 0.06 | 0.17 | 0.53 | 0.86 | 0.06 | 0.20 | 0.60 | 0.92 | 0.04 | 0.07 | 0.15 | 0.29 | 0.15 | 0.64 | 1.00 | 1.00 |
| 729    | 6003  | 306383 | 0.08 | 0.27 | 0.77 | 0.98 | 0.08 | 0.27 | 0.84 | 0.99 | 0.04 | 0.09 | 0.24 | 0.47 | 0.23 | 0.86 | 1.00 | 1.00 |
| 729.1  | 835   | 306383 | 0.04 | 0.07 | 0.17 | 0.33 | 0.04 | 0.08 | 0.20 | 0.38 | 0.03 | 0.04 | 0.07 | 0.10 | 0.07 | 0.21 | 0.63 | 0.93 |
| 731    | 290   | 320016 | 0.03 | 0.05 | 0.09 | 0.14 | 0.03 | 0.05 | 0.10 | 0.16 | 0.03 | 0.03 | 0.05 | 0.06 | 0.05 | 0.10 | 0.27 | 0.53 |
| 731.1  | 239   | 320016 | 0.03 | 0.05 | 0.08 | 0.13 | 0.03 | 0.05 | 0.09 | 0.14 | 0.03 | 0.03 | 0.04 | 0.06 | 0.04 | 0.09 | 0.23 | 0.46 |
| 732    | 461   | 320016 | 0.04 | 0.06 | 0.11 | 0.20 | 0.04 | 0.06 | 0.11 | 0.23 | 0.03 | 0.06 | 0.03 | 0.05 | 0.08 | 0.05 | 0.13 | 0.40 |
| 732.1  | 205   | 320016 | 0.03 | 0.04 | 0.07 | 0.11 | 0.03 | 0.05 | 0.08 | 0.13 | 0.03 | 0.03 | 0.04 | 0.05 | 0.04 | 0.08 | 0.21 | 0.40 |
| 733    | 2100  | 320016 | 0.05 | 0.12 | 0.36 | 0.67 | 0.05 | 0.14 | 0.42 | 0.75 | 0.04 | 0.06 | 0.11 | 0.20 | 0.11 | 0.45 | 0.95 | 1.00 |
| 733.2  | 295   | 320016 | 0.03 | 0.05 | 0.09 | 0.15 | 0.03 | 0.05 | 0.10 | 0.17 | 0.03 | 0.03 | 0.03 | 0.06 | 0.05 | 0.10 | 0.28 | 0.54 |
| 733.4  | 518   | 320016 | 0.04 | 0.06 | 0.12 | 0.22 | 0.04 | 0.06 | 0.14 | 0.22 | 0.03 | 0.06 | 0.04 | 0.06 | 0.06 | 0.15 | 0.44 | 0.78 |
| 733.8  | 1175  | 320016 | 0.04 | 0.09 | 0.22 | 0.44 | 0.04 | 0.10 | 0.26 | 0.50 | 0.03 | 0.05 | 0.08 | 0.13 | 0.08 | 0.28 | 0.78 | 0.98 |
| 735    | 8929  | 324005 | 0.10 | 0.37 | 0.90 | 1.00 | 0.11 | 0.43 | 0.95 | 1.00 | 0.05 | 0.11 | 0.33 | 0.62 | 0.32 | 0.96 | 1.00 | 1.00 |
| 735.1  | 215   | 324005 | 0.03 | 0.04 | 0.07 | 0.12 | 0.03 | 0.05 | 0.08 | 0.13 | 0.03 | 0.03 | 0.04 | 0.05 | 0.04 | 0.08 | 0.21 | 0.42 |
| 735.2  | 4749  | 324005 | 0.07 | 0.22 | 0.67 | 0.95 | 0.08 | 0.26 | 0.75 | 0.98 | 0.04 | 0.08 | 0.20 | 0.39 | 0.19 | 0.78 | 1.00 | 1.00 |
| 735.21 | 1813  | 324005 | 0.05 | 0.11 | 0.32 | 0.61 | 0.05 | 0.13 | 0.37 | 0.68 | 0.03 | 0.05 | 0.10 | 0.18 | 0.10 | 0.40 | 0.92 | 1.00 |
| 735.23 | 1423  | 324005 | 0.04 | 0.10 | 0.26 | 0.51 | 0.05 | 0.11 | 0.30 | 0.58 | 0.03 | 0.05 | 0.09 | 0.15 | 0.09 | 0.32 | 0.85 | 0.99 |
| 735.3  | 6000  | 324005 | 0.08 | 0.27 | 0.77 | 0.98 | 0.08 | 0.31 | 0.84 | 0.99 | 0.04 | 0.09 | 0.24 | 0.47 | 0.23 | 0.87 | 1.00 | 1.00 |
| 736    | 1764  | 324005 | 0.05 | 0.11 | 0.31 | 0.60 | 0.05 | 0.12 | 0.36 | 0.67 | 0.03 | 0.05 | 0.10 | 0.17 | 0.10 | 0.39 | 0.92 | 1.00 |
| 736.2  | 234   | 324005 | 0.03 | 0.05 | 0.08 | 0.12 | 0.03 | 0.05 | 0.08 | 0.14 | 0.03 | 0.03 | 0.03 | 0.04 | 0.04 | 0.09 | 0.23 | 0.45 |
| 737    | 1419  | 324005 | 0.04 | 0.10 | 0.26 | 0.51 | 0.05 | 0.11 | 0.30 | 0.58 | 0.03 | 0.05 | 0.09 | 0.15 | 0.09 | 0.32 | 0.85 | 0.99 |
| 737.1  | 213   | 324005 | 0.03 | 0.04 | 0.07 | 0.12 | 0.03 | 0.05 | 0.08 | 0.13 | 0.03 | 0.03 | 0.04 | 0.05 | 0.04 | 0.08 | 0.21 | 0.42 |
| 737.3  | 1174  | 324005 | 0.04 | 0.09 | 0.22 | 0.44 | 0.04 | 0.10 | 0.26 | 0.50 | 0.03 | 0.05 | 0.08 | 0.13 | 0.08 | 0.28 | 0.78 | 0.98 |
| 738    | 1991  | 324005 | 0.05 | 0.12 | 0.34 | 0.65 | 0.05 | 0.12 | 0.34 | 0.65 | 0.03 | 0.06 | 0.11 | 0.19 | 0.11 | 0.43 | 0.94 | 1.00 |
| 738.4  | 1644  | 324005 | 0.05 | 0.11 | 0.29 | 0.57 | 0.05 | 0.12 | 0.34 | 0.64 | 0.03 | 0.05 | 0.10 | 0.17 | 0.09 | 0.36 | 0.90 | 1.00 |
| 739    | 496   | 324005 | 0.04 | 0.06 | 0.12 | 0.21 | 0.04 | 0.06 | 0.13 | 0.25 | 0.03 | 0.04 | 0.06 | 0.08 | 0.05 | 0.14 | 0.43 | 0.76 |
| 740    | 50335 | 287140 | 0.31 | 0.95 | 1.00 | 1.00 | 0.35 | 0.98 | 1.00 | 1.00 | 0.10 | 0.39 | 0.92 | 1.00 | 0.91 | 1.00 | 1.00 | 1.00 |
| 740.1  | 31034 | 287140 | 0.22 | 0.83 | 1.00 | 1.00 | 0.25 | 0.89 | 1.00 | 1.00 | 0.08 | 0.27 | 0.78 | 0.98 | 0.76 | 1.00 | 1.00 | 1.00 |
| 740.11 | 8866  | 287140 | 0.10 | 0.37 | 0.90 | 1.00 | 0.11 | 0.43 | 0.94 | 1.00 | 0.05 | 0.11 | 0.33 | 0.62 | 0.32 | 0.96 | 1.00 | 1.00 |
| 740.12 | 634   | 287140 | 0.04 | 0.06 | 0.14 | 0.26 | 0.04 | 0.07 | 0.16 | 0.30 | 0.03 | 0.04 | 0.06 | 0.09 | 0.06 | 0.17 | 0.52 | 0.85 |
| 740.2  | 4353  | 287140 | 0.07 | 0.21 | 0.63 | 0.93 | 0.07 | 0.24 | 0.71 | 0.96 | 0.04 | 0.08 | 0.19 | 0.36 | 0.18 | 0.74 | 1.00 | 1.00 |
| 740.9  | 28265 | 287140 | 0.20 | 0.80 | 1.00 | 1.00 | 0.23 | 0.87 | 1.00 | 1.00 | 0.08 | 0.26 | 0.74 | 0.97 | 0.73 | 1.00 | 1.00 | 1.00 |
| 741    | 3744  | 331152 | 0.06 | 0.19 | 0.57 | 0.89 | 0.07 | 0.21 | 0.64 | 0.89 | 0.04 | 0.07 | 0.17 | 0.32 | 0.16 | 0.68 | 1.00 | 1.00 |
| 741.2  | 590   | 331152 | 0.04 | 0.06 | 0.13 | 0.25 | 0.04 | 0.07 | 0.15 | 0.29 | 0.03 | 0.04 | 0.06 | 0.09 | 0.06 | 0.16 | 0.49 | 0.83 |
| 741.4  | 1400  | 331152 | 0.04 | 0.10 | 0.26 | 0.50 | 0.05 | 0.11 | 0.30 | 0.57 | 0.03 | 0.05 | 0.09 | 0.15 | 0.09 | 0.32 | 0.85 | 0.99 |
| 742    | 2856  | 331152 | 0.06 | 0.15 | 0.46 | 0.80 | 0.06 | 0.17 | 0.53 | 0.86 | 0.04 | 0.06 | 0.14 | 0.25 | 0.13 | 0.57 | 0.99 | 1.00 |
| 742.1  | 297   | 331152 | 0.03 | 0.05 | 0.09 | 0.15 | 0.03 | 0.05 | 0.10 | 0.17 | 0.03 | 0.03 | 0.03 | 0.05 | 0.05 | 0.10 | 0.28 | 0.54 |
| 742.2  | 383   | 331152 | 0.03 | 0.05 | 0.10 | 0.18 | 0.04 | 0.06 | 0.11 | 0.20 | 0.03 | 0.04 | 0.05 | 0.07 | 0.05 | 0.12 | 0.35 | 0.65 |
| 742.8  | 970   | 331152 | 0.04 | 0.08 | 0.19 | 0.37 | 0.04 | 0.09 | 0.22 | 0.43 | 0.03 | 0.04 | 0.07 | 0.11 | 0.07 | 0.24 | 0.70 | 0.96 |
| 742.9  | 2384  | 331152 | 0.05 | 0.13 | 0.40 | 0.72 | 0.06 | 0.15 | 0.46 | 0.80 | 0.04 | 0.06 | 0.12 | 0.22 | 0.12 | 0.49 | 0.97 | 1.00 |
| 743    | 7552  | 329923 | 0.09 | 0.32 | 0.85 | 0.99 | 0.10 | 0.38 | 0.91 | 0.99 | 0.05 | 0.10 | 0.29 | 0.55 | 0.28 | 0.93 | 1.00 | 1.00 |
| 743.1  | 6241  | 329923 | 0.08 | 0.28 | 0.78 | 0.98 | 0.09 | 0.32 | 0.85 | 0.99 | 0.04 | 0.09 | 0.25 | 0.48 | 0.24 | 0.88 | 1.00 | 1.00 |
| 743.11 | 6220  | 329923 | 0.08 | 0.28 | 0.78 | 0.98 | 0.09 | 0.32 | 0.85 | 0.99 | 0.04 | 0.09 | 0.25 | 0.48 | 0.24 | 0.88 | 1.00 | 1.00 |
| 743.2  | 571   | 329923 | 0.04 | 0.06 | 0.13 | 0.24 | 0.04 | 0.07 | 0.15 | 0.28 | 0.03 | 0.04 | 0.06 | 0.08 | 0.06 | 0.16 | 0.48 | 0.82 |
| 743.21 | 325   | 329923 | 0.03 | 0.05 | 0.09 | 0.16 | 0.03 | 0.05 | 0.10 | 0.18 | 0.03 | 0.03 | 0.03 | 0.05 | 0.05 | 0.11 | 0.30 | 0.58 |
| 743.9  | 836   | 329923 | 0.04 | 0.07 | 0.17 | 0.33 | 0.04 | 0.07 | 0.20 | 0.38 | 0.03 | 0.08 | 0.04 | 0.07 | 0.07 | 0.21 | 0.64 | 0.93 |
| 745    | 7733  | 329742 | 0.09 | 0.33 | 0.86 | 1.00 | 0.10 | 0.38 | 0.91 | 1.00 | 0.05 | 0.11 | 0.29 | 0.56 | 0.28 | 0.93 | 1.00 | 1.00 |
| 747    | 3002  | 329064 | 0.06 | 0.16 | 0.48 | 0.82 | 0.06 | 0.18 | 0.55 | 0.88 | 0.04 | 0.06 | 0.14 | 0.26 | 0.14 | 0.59 | 0.99 | 1.00 |
| 747.1  | 2826  | 329064 | 0.06 | 0.15 | 0.46 | 0.79 | 0.06 | 0.17 | 0.53 | 0.86 | 0.04 | 0.06 | 0.14 | 0.25 | 0.13 | 0.56 | 0.99 | 1.00 |
| 747.11 | 576   | 329064 | 0.04 | 0.06 | 0.13 | 0.24 | 0.04 | 0.07 | 0.15 | 0.28 | 0.03 | 0.04 | 0.06 | 0.08 | 0.06 | 0.16 | 0.48 | 0.82 |
| 747.12 | 270   | 329064 | 0.03 | 0.05 | 0.08 | 0.14 | 0.03 | 0.05 | 0.09 | 0.15 | 0.03 | 0.03 | 0.05 | 0.06 | 0.04 | 0.10 | 0.26 | 0.50 |
| 747.13 | 2015  | 329064 | 0.05 | 0.12 | 0.35 | 0.65 | 0.05 | 0.13 | 0.40 | 0.73 | 0.03 | 0.06 | 0.11 | 0.19 | 0.11 | 0.43 | 0.95 | 1.00 |
| 749    | 295   | 329064 | 0.03 | 0.05 | 0.09 | 0.15 | 0.03 | 0.05 | 0.10 | 0.17 | 0.03 | 0.03 | 0.03 | 0.05 | 0.05 | 0.10 | 0.28 | 0.54 |
| 750    | 706   | 329064 | 0.04 | 0.07 | 0.15 | 0.29 | 0.04 | 0.07 | 0.17 | 0.33 | 0.03 | 0.04 | 0.06 | 0.09 | 0.06 | 0.18 | 0.56 | 0.89 |
| 750.1  | 351   | 329064 | 0.03 | 0.05 | 0.10 | 0.16 | 0.03 | 0.05 | 0.11 | 0.19 | 0.03 | 0.04 | 0.05 | 0.07 | 0.05 | 0.11 | 0.32 | 0.61 |
| 750.13 | 204   | 329064 | 0.03 | 0.04 | 0.07 | 0.11 | 0.03 | 0.05 | 0.08 | 0.13 | 0.03 | 0.03 | 0.04 | 0.05 | 0.04 | 0.08 | 0.21 | 0.40 |
| 750.2  | 348   | 329064 | 0.03 | 0.05 | 0.10 | 0.16 | 0.03 | 0.05 | 0.11 | 0.19 | 0.03 | 0.04 | 0.05 | 0.07 | 0.05 | 0.11 | 0.32 | 0.61 |
| 750.21 | 222   | 329064 | 0.03 | 0.04 | 0.08 | 0.12 | 0.03 | 0.05 | 0.08 | 0.13 | 0.03 | 0.03 | 0.04 | 0.06 | 0.04 | 0.09 | 0.22 | 0.43 |
| 751    | 1465  | 329064 | 0.05 | 0.10 |      |      |      |      |      |      |      |      |      |      |      |      |      |      |

|        |       |        |      |      |      |      |      |      |      |      |      |      |      |      |      |      |      |      |
|--------|-------|--------|------|------|------|------|------|------|------|------|------|------|------|------|------|------|------|------|
| 751.21 | 394   | 329064 | 0.03 | 0.05 | 0.10 | 0.18 | 0.04 | 0.06 | 0.11 | 0.21 | 0.03 | 0.04 | 0.05 | 0.07 | 0.05 | 0.12 | 0.35 | 0.66 |
| 751.22 | 333   | 329064 | 0.03 | 0.05 | 0.09 | 0.16 | 0.03 | 0.05 | 0.10 | 0.18 | 0.03 | 0.04 | 0.05 | 0.06 | 0.05 | 0.11 | 0.31 | 0.59 |
| 752    | 1689  | 329064 | 0.05 | 0.11 | 0.30 | 0.58 | 0.05 | 0.12 | 0.35 | 0.65 | 0.03 | 0.05 | 0.10 | 0.17 | 0.10 | 0.37 | 0.91 | 1.00 |
| 752.1  | 1613  | 329064 | 0.05 | 0.10 | 0.29 | 0.56 | 0.05 | 0.12 | 0.34 | 0.63 | 0.03 | 0.05 | 0.10 | 0.16 | 0.09 | 0.36 | 0.89 | 1.00 |
| 754    | 1491  | 329064 | 0.05 | 0.10 | 0.27 | 0.53 | 0.05 | 0.11 | 0.31 | 0.60 | 0.03 | 0.05 | 0.09 | 0.15 | 0.09 | 0.34 | 0.87 | 1.00 |
| 755    | 432   | 329064 | 0.03 | 0.06 | 0.11 | 0.19 | 0.04 | 0.06 | 0.12 | 0.22 | 0.03 | 0.04 | 0.05 | 0.07 | 0.05 | 0.13 | 0.38 | 0.70 |
| 755.1  | 222   | 329064 | 0.03 | 0.04 | 0.08 | 0.12 | 0.03 | 0.05 | 0.08 | 0.13 | 0.03 | 0.03 | 0.04 | 0.06 | 0.04 | 0.09 | 0.22 | 0.43 |
| 756    | 590   | 329064 | 0.04 | 0.06 | 0.13 | 0.25 | 0.04 | 0.07 | 0.15 | 0.29 | 0.03 | 0.04 | 0.06 | 0.09 | 0.06 | 0.16 | 0.49 | 0.83 |
| 756.5  | 425   | 329064 | 0.03 | 0.05 | 0.11 | 0.19 | 0.04 | 0.06 | 0.12 | 0.22 | 0.03 | 0.04 | 0.05 | 0.07 | 0.05 | 0.13 | 0.38 | 0.69 |
| 759    | 223   | 329064 | 0.03 | 0.04 | 0.08 | 0.12 | 0.03 | 0.04 | 0.08 | 0.12 | 0.03 | 0.05 | 0.03 | 0.04 | 0.04 | 0.09 | 0.22 | 0.43 |
| 760    | 10889 | 257697 | 0.11 | 0.43 | 0.95 | 1.00 | 0.12 | 0.50 | 0.97 | 1.00 | 0.05 | 0.13 | 0.38 | 0.70 | 0.37 | 0.98 | 1.00 | 1.00 |
| 761    | 1764  | 257697 | 0.05 | 0.11 | 0.31 | 0.60 | 0.05 | 0.12 | 0.36 | 0.67 | 0.03 | 0.05 | 0.10 | 0.17 | 0.10 | 0.39 | 0.92 | 1.00 |
| 764    | 2339  | 257697 | 0.05 | 0.13 | 0.39 | 0.72 | 0.06 | 0.15 | 0.45 | 0.79 | 0.04 | 0.06 | 0.12 | 0.22 | 0.12 | 0.48 | 0.97 | 1.00 |
| 765    | 505   | 257697 | 0.04 | 0.06 | 0.12 | 0.22 | 0.04 | 0.06 | 0.14 | 0.22 | 0.03 | 0.04 | 0.06 | 0.08 | 0.05 | 0.14 | 0.43 | 0.77 |
| 766    | 1265  | 257697 | 0.04 | 0.09 | 0.24 | 0.46 | 0.05 | 0.10 | 0.27 | 0.53 | 0.03 | 0.05 | 0.08 | 0.14 | 0.08 | 0.29 | 0.81 | 0.99 |
| 770    | 1789  | 257697 | 0.05 | 0.11 | 0.31 | 0.60 | 0.05 | 0.12 | 0.36 | 0.68 | 0.03 | 0.05 | 0.10 | 0.18 | 0.10 | 0.39 | 0.92 | 1.00 |
| 771    | 776   | 257697 | 0.04 | 0.07 | 0.16 | 0.31 | 0.04 | 0.08 | 0.19 | 0.36 | 0.03 | 0.04 | 0.07 | 0.10 | 0.06 | 0.20 | 0.60 | 0.91 |
| 771.1  | 4680  | 257697 | 0.07 | 0.22 | 0.66 | 0.95 | 0.07 | 0.25 | 0.74 | 0.95 | 0.04 | 0.08 | 0.20 | 0.38 | 0.19 | 0.77 | 1.00 | 1.00 |
| 772    | 676   | 257697 | 0.04 | 0.07 | 0.15 | 0.28 | 0.04 | 0.07 | 0.17 | 0.32 | 0.03 | 0.04 | 0.06 | 0.09 | 0.06 | 0.18 | 0.54 | 0.87 |
| 773    | 5984  | 257697 | 0.08 | 0.27 | 0.76 | 0.98 | 0.08 | 0.31 | 0.83 | 0.99 | 0.04 | 0.09 | 0.24 | 0.46 | 0.23 | 0.86 | 1.00 | 1.00 |
| 780    | 212   | 257697 | 0.03 | 0.04 | 0.07 | 0.12 | 0.03 | 0.05 | 0.08 | 0.13 | 0.03 | 0.03 | 0.04 | 0.05 | 0.04 | 0.08 | 0.21 | 0.41 |
| 781    | 9086  | 257697 | 0.10 | 0.38 | 0.91 | 1.00 | 0.11 | 0.43 | 0.95 | 1.00 | 0.05 | 0.12 | 0.33 | 0.63 | 0.32 | 0.96 | 1.00 | 1.00 |
| 782.3  | 1941  | 257697 | 0.05 | 0.12 | 0.34 | 0.64 | 0.05 | 0.13 | 0.39 | 0.71 | 0.03 | 0.05 | 0.11 | 0.19 | 0.10 | 0.42 | 0.94 | 1.00 |
| 783    | 3998  | 257697 | 0.06 | 0.19 | 0.59 | 0.91 | 0.07 | 0.22 | 0.67 | 0.95 | 0.04 | 0.07 | 0.17 | 0.33 | 0.17 | 0.71 | 1.00 | 1.00 |
| 785    | 37426 | 257697 | 0.24 | 0.89 | 1.00 | 1.00 | 0.28 | 0.93 | 1.00 | 1.00 | 0.09 | 0.31 | 0.84 | 0.99 | 0.82 | 1.00 | 1.00 | 1.00 |
| 788    | 9030  | 257697 | 0.10 | 0.37 | 0.91 | 1.00 | 0.11 | 0.43 | 0.95 | 1.00 | 0.05 | 0.12 | 0.33 | 0.63 | 0.32 | 0.96 | 1.00 | 1.00 |
| 789    | 11420 | 257697 | 0.11 | 0.45 | 0.96 | 1.00 | 0.12 | 0.52 | 0.98 | 1.00 | 0.05 | 0.13 | 0.40 | 0.72 | 0.39 | 0.99 | 1.00 | 1.00 |
| 790.6  | 6857  | 257697 | 0.08 | 0.30 | 0.82 | 0.99 | 0.09 | 0.35 | 0.88 | 1.00 | 0.05 | 0.10 | 0.26 | 0.51 | 0.26 | 0.90 | 1.00 | 1.00 |
| 791    | 645   | 257697 | 0.04 | 0.06 | 0.14 | 0.27 | 0.04 | 0.07 | 0.16 | 0.31 | 0.03 | 0.04 | 0.06 | 0.09 | 0.06 | 0.17 | 0.53 | 0.86 |
| 793.2  | 608   | 257697 | 0.04 | 0.06 | 0.14 | 0.25 | 0.04 | 0.07 | 0.15 | 0.29 | 0.03 | 0.04 | 0.06 | 0.09 | 0.06 | 0.16 | 0.50 | 0.84 |
| 798    | 3438  | 257697 | 0.06 | 0.17 | 0.53 | 0.86 | 0.07 | 0.20 | 0.61 | 0.86 | 0.04 | 0.07 | 0.16 | 0.30 | 0.15 | 0.64 | 1.00 | 1.00 |
| 798.1  | 607   | 257697 | 0.04 | 0.06 | 0.14 | 0.25 | 0.04 | 0.07 | 0.15 | 0.29 | 0.03 | 0.04 | 0.06 | 0.09 | 0.06 | 0.16 | 0.50 | 0.84 |
| 800    | 6862  | 243043 | 0.08 | 0.30 | 0.82 | 0.99 | 0.09 | 0.35 | 0.88 | 1.00 | 0.05 | 0.10 | 0.26 | 0.51 | 0.26 | 0.90 | 1.00 | 1.00 |
| 800.1  | 1926  | 243043 | 0.05 | 0.12 | 0.33 | 0.63 | 0.05 | 0.13 | 0.39 | 0.71 | 0.03 | 0.05 | 0.11 | 0.19 | 0.10 | 0.41 | 0.94 | 1.00 |
| 800.2  | 888   | 243043 | 0.04 | 0.08 | 0.18 | 0.35 | 0.04 | 0.08 | 0.21 | 0.35 | 0.03 | 0.04 | 0.07 | 0.11 | 0.07 | 0.22 | 0.66 | 0.95 |
| 800.3  | 1976  | 243043 | 0.05 | 0.12 | 0.34 | 0.64 | 0.05 | 0.13 | 0.40 | 0.72 | 0.03 | 0.05 | 0.11 | 0.19 | 0.11 | 0.42 | 0.94 | 1.00 |
| 800.4  | 689   | 243043 | 0.04 | 0.07 | 0.15 | 0.28 | 0.04 | 0.07 | 0.17 | 0.32 | 0.03 | 0.04 | 0.06 | 0.09 | 0.06 | 0.18 | 0.55 | 0.88 |
| 801    | 1992  | 243043 | 0.05 | 0.12 | 0.34 | 0.65 | 0.05 | 0.13 | 0.40 | 0.72 | 0.03 | 0.05 | 0.11 | 0.19 | 0.11 | 0.43 | 0.94 | 1.00 |
| 801.1  | 1220  | 243043 | 0.04 | 0.09 | 0.23 | 0.45 | 0.05 | 0.10 | 0.27 | 0.52 | 0.03 | 0.05 | 0.08 | 0.13 | 0.08 | 0.28 | 0.79 | 0.99 |
| 802    | 759   | 243043 | 0.04 | 0.07 | 0.16 | 0.30 | 0.04 | 0.08 | 0.18 | 0.35 | 0.03 | 0.04 | 0.07 | 0.10 | 0.06 | 0.19 | 0.59 | 0.91 |
| 803    | 8356  | 243043 | 0.09 | 0.35 | 0.88 | 1.00 | 0.10 | 0.41 | 0.93 | 1.00 | 0.05 | 0.11 | 0.31 | 0.59 | 0.30 | 0.95 | 1.00 | 1.00 |
| 803.1  | 1610  | 243043 | 0.05 | 0.10 | 0.29 | 0.56 | 0.05 | 0.12 | 0.33 | 0.63 | 0.03 | 0.05 | 0.10 | 0.16 | 0.09 | 0.36 | 0.89 | 1.00 |
| 803.2  | 5165  | 243043 | 0.07 | 0.24 | 0.70 | 0.96 | 0.08 | 0.27 | 0.78 | 0.98 | 0.04 | 0.08 | 0.21 | 0.41 | 0.20 | 0.81 | 1.00 | 1.00 |
| 803.3  | 1581  | 243043 | 0.05 | 0.10 | 0.28 | 0.55 | 0.05 | 0.11 | 0.33 | 0.62 | 0.03 | 0.05 | 0.09 | 0.16 | 0.09 | 0.35 | 0.89 | 1.00 |
| 804    | 3156  | 243043 | 0.06 | 0.16 | 0.50 | 0.84 | 0.06 | 0.19 | 0.57 | 0.89 | 0.04 | 0.07 | 0.15 | 0.28 | 0.14 | 0.61 | 0.99 | 1.00 |
| 805    | 1685  | 243043 | 0.05 | 0.11 | 0.30 | 0.58 | 0.05 | 0.12 | 0.35 | 0.65 | 0.03 | 0.05 | 0.10 | 0.17 | 0.10 | 0.37 | 0.90 | 1.00 |
| 807    | 1555  | 243043 | 0.05 | 0.10 | 0.28 | 0.54 | 0.05 | 0.11 | 0.32 | 0.62 | 0.03 | 0.05 | 0.09 | 0.16 | 0.09 | 0.35 | 0.88 | 1.00 |
| 809    | 10448 | 243043 | 0.10 | 0.42 | 0.94 | 1.00 | 0.12 | 0.48 | 0.97 | 1.00 | 0.05 | 0.13 | 0.37 | 0.69 | 0.36 | 0.98 | 1.00 | 1.00 |
| 817    | 219   | 243043 | 0.03 | 0.04 | 0.07 | 0.12 | 0.03 | 0.05 | 0.08 | 0.13 | 0.03 | 0.03 | 0.04 | 0.05 | 0.04 | 0.09 | 0.22 | 0.43 |
| 818    | 667   | 243043 | 0.04 | 0.07 | 0.15 | 0.27 | 0.04 | 0.07 | 0.17 | 0.32 | 0.03 | 0.04 | 0.06 | 0.09 | 0.06 | 0.18 | 0.54 | 0.87 |
| 819    | 2986  | 243043 | 0.06 | 0.16 | 0.48 | 0.81 | 0.06 | 0.18 | 0.55 | 0.88 | 0.04 | 0.06 | 0.14 | 0.26 | 0.14 | 0.58 | 0.99 | 1.00 |
| 830    | 1954  | 243043 | 0.05 | 0.12 | 0.34 | 0.64 | 0.05 | 0.13 | 0.39 | 0.72 | 0.03 | 0.05 | 0.11 | 0.19 | 0.10 | 0.42 | 0.94 | 1.00 |
| 835    | 13967 | 243043 | 0.12 | 0.52 | 0.98 | 1.00 | 0.14 | 0.59 | 0.99 | 1.00 | 0.06 | 0.15 | 0.46 | 0.80 | 0.45 | 1.00 | 1.00 | 1.00 |
| 836    | 498   | 243043 | 0.04 | 0.06 | 0.12 | 0.22 | 0.04 | 0.06 | 0.13 | 0.25 | 0.03 | 0.04 | 0.06 | 0.08 | 0.05 | 0.14 | 0.43 | 0.76 |
| 840    | 866   | 243043 | 0.04 | 0.07 | 0.18 | 0.34 | 0.04 | 0.08 | 0.20 | 0.39 | 0.03 | 0.04 | 0.07 | 0.11 | 0.07 | 0.22 | 0.65 | 0.94 |
| 840.3  | 457   | 243043 | 0.04 | 0.06 | 0.11 | 0.20 | 0.04 | 0.06 | 0.13 | 0.23 | 0.03 | 0.04 | 0.05 | 0.08 | 0.05 | 0.13 | 0.40 | 0.72 |
| 850    | 5032  | 243043 | 0.07 | 0.23 | 0.69 | 0.96 | 0.08 | 0.27 | 0.77 | 0.98 | 0.04 | 0.08 | 0.21 | 0.40 | 0.20 | 0.80 | 1.00 | 1.00 |
| 851    | 17270 | 243043 | 0.14 | 0.60 | 0.99 | 1.00 | 0.16 | 0.68 | 1.00 | 1.00 | 0.06 | 0.18 | 0.54 | 0.87 | 0.53 | 1.00 | 1.00 | 1.00 |
| 853    | 494   | 243043 | 0.04 | 0.06 | 0.12 | 0.21 | 0.04 | 0.06 | 0.13 | 0.25 | 0.03 | 0.04 | 0.05 | 0.08 | 0.05 | 0.14 | 0.43 | 0.76 |
| 854    | 2535  | 243043 | 0.05 | 0.14 | 0.42 | 0.75 | 0.06 | 0.16 | 0.48 | 0.82 | 0.04 | 0.06 | 0.13 | 0.23 | 0.12 | 0.52 | 0.98 | 1.00 |
| 857    | 1436  | 243043 | 0.05 | 0.10 | 0.26 | 0.51 | 0.05 | 0.11 | 0.30 | 0.58 | 0.03 | 0.05 | 0.09 | 0.15 | 0.09 | 0.33 | 0.85 | 0.99 |
| 858    | 3502  | 243043 | 0.06 | 0.18 | 0.54 | 0.87 | 0.07 | 0.20 | 0.61 | 0.92 | 0.04 | 0.07 | 0.16 | 0.30 | 0.15 | 0.65 | 1.00 | 1.00 |
| 859    | 3509  | 243043 | 0.06 | 0.18 | 0.54 | 0.87 | 0.07 | 0.20 | 0.61 | 0.92 | 0.04 | 0.07 | 0.16 | 0.30 | 0.15 | 0.65 | 1.00 | 1.00 |
| 870    | 3784  | 243043 | 0.06 | 0.19 | 0.57 | 0.89 | 0.07 | 0.21 | 0.65 | 0.94 | 0.04 | 0.07 | 0.17 | 0.32 | 0.16 | 0.68 | 1.00 | 1.00 |
| 870.1  | 522   | 243043 | 0.04 | 0.06 | 0.12 | 0.22 | 0.04 | 0.06 | 0.14 | 0.26 | 0.03 | 0.04 | 0.06 | 0.08 | 0.06 | 0.15 | 0.45 | 0.78 |
| 870.3  | 2938  | 243043 | 0.06 | 0.15 | 0.47 | 0.81 | 0.06 | 0.18 | 0.54 | 0.87 | 0.04 | 0.06 | 0.14 | 0.26 | 0.14 | 0.58 | 0.99 | 1.00 |
| 870.4  | 247   | 243043 | 0.03 | 0.05 | 0.08 | 0.13 | 0.03 | 0.05 | 0.09 | 0.15 | 0.03 | 0.03 | 0.04 | 0.06 | 0.04 | 0.09 | 0.24 | 0.47 |
| 870.5  | 374   | 243043 | 0.03 | 0.05 | 0.10 | 0.17 | 0.03 | 0.06 | 0.11 | 0.20 | 0.03 | 0.04 | 0.05 | 0.07 | 0.05 | 0.12 | 0.34 | 0.64 |
| 871    | 4405  | 243043 | 0.07 | 0.21 | 0.64 | 0.93 | 0.07 | 0.24 | 0.71 | 0.97 | 0.04 | 0.08 | 0.19 | 0.36 | 0.18 | 0.75 | 1.00 | 1.00 |
| 872    | 435   | 243043 | 0.03 | 0.06 | 0.11 | 0.19 | 0.04 | 0.06 | 0.12 | 0.22 | 0.   |      |      |      |      |      |      |      |

|                                                |       |        |      |      |      |      |      |      |      |      |      |      |      |      |      |      |      |      |
|------------------------------------------------|-------|--------|------|------|------|------|------|------|------|------|------|------|------|------|------|------|------|------|
| 938                                            | 368   | 288850 | 0.03 | 0.05 | 0.10 | 0.17 | 0.03 | 0.06 | 0.11 | 0.20 | 0.03 | 0.04 | 0.05 | 0.07 | 0.05 | 0.12 | 0.33 | 0.63 |
| 938.2                                          | 256   | 288850 | 0.03 | 0.05 | 0.08 | 0.13 | 0.03 | 0.05 | 0.09 | 0.15 | 0.03 | 0.03 | 0.04 | 0.06 | 0.04 | 0.09 | 0.25 | 0.48 |
| 939                                            | 2227  | 288850 | 0.05 | 0.13 | 0.38 | 0.70 | 0.05 | 0.14 | 0.44 | 0.77 | 0.04 | 0.06 | 0.12 | 0.21 | 0.11 | 0.47 | 0.96 | 1.00 |
| 941                                            | 259   | 241796 | 0.03 | 0.05 | 0.08 | 0.13 | 0.03 | 0.05 | 0.09 | 0.15 | 0.03 | 0.03 | 0.04 | 0.06 | 0.04 | 0.09 | 0.25 | 0.49 |
| 946                                            | 527   | 241796 | 0.04 | 0.06 | 0.12 | 0.23 | 0.04 | 0.06 | 0.14 | 0.26 | 0.03 | 0.04 | 0.06 | 0.08 | 0.06 | 0.15 | 0.45 | 0.78 |
| 947                                            | 541   | 288850 | 0.04 | 0.06 | 0.13 | 0.23 | 0.04 | 0.06 | 0.14 | 0.27 | 0.03 | 0.04 | 0.06 | 0.08 | 0.06 | 0.15 | 0.46 | 0.79 |
| 949                                            | 397   | 241796 | 0.03 | 0.05 | 0.10 | 0.18 | 0.04 | 0.06 | 0.12 | 0.21 | 0.03 | 0.04 | 0.05 | 0.07 | 0.05 | 0.12 | 0.36 | 0.66 |
| 958                                            | 531   | 243043 | 0.04 | 0.06 | 0.12 | 0.23 | 0.04 | 0.06 | 0.14 | 0.26 | 0.03 | 0.04 | 0.06 | 0.08 | 0.06 | 0.15 | 0.45 | 0.79 |
| 960                                            | 18479 | 243043 | 0.15 | 0.63 | 1.00 | 1.00 | 0.17 | 0.71 | 1.00 | 1.00 | 0.06 | 0.19 | 0.57 | 0.89 | 0.55 | 1.00 | 1.00 | 1.00 |
| 960.2                                          | 16028 | 243043 | 0.14 | 0.57 | 0.99 | 1.00 | 0.15 | 0.65 | 1.00 | 1.00 | 0.06 | 0.17 | 0.51 | 0.85 | 0.50 | 1.00 | 1.00 | 1.00 |
| 961                                            | 411   | 243043 | 0.03 | 0.05 | 0.11 | 0.19 | 0.04 | 0.06 | 0.12 | 0.21 | 0.03 | 0.04 | 0.05 | 0.07 | 0.05 | 0.12 | 0.37 | 0.68 |
| 961.1                                          | 842   | 243043 | 0.04 | 0.07 | 0.17 | 0.33 | 0.04 | 0.08 | 0.20 | 0.38 | 0.03 | 0.04 | 0.07 | 0.11 | 0.07 | 0.21 | 0.64 | 0.93 |
| 962                                            | 482   | 243043 | 0.04 | 0.06 | 0.12 | 0.21 | 0.04 | 0.06 | 0.13 | 0.24 | 0.03 | 0.04 | 0.05 | 0.08 | 0.05 | 0.14 | 0.42 | 0.75 |
| 962.3                                          | 357   | 243043 | 0.03 | 0.05 | 0.10 | 0.17 | 0.03 | 0.05 | 0.11 | 0.19 | 0.03 | 0.04 | 0.05 | 0.07 | 0.05 | 0.11 | 0.33 | 0.62 |
| 963                                            | 2626  | 243043 | 0.05 | 0.14 | 0.43 | 0.76 | 0.06 | 0.16 | 0.50 | 0.83 | 0.04 | 0.06 | 0.13 | 0.24 | 0.13 | 0.53 | 0.98 | 1.00 |
| 964                                            | 391   | 243043 | 0.03 | 0.05 | 0.10 | 0.18 | 0.04 | 0.06 | 0.11 | 0.20 | 0.03 | 0.04 | 0.05 | 0.07 | 0.05 | 0.12 | 0.35 | 0.66 |
| 964.1                                          | 298   | 243043 | 0.03 | 0.05 | 0.09 | 0.15 | 0.03 | 0.05 | 0.10 | 0.17 | 0.03 | 0.03 | 0.05 | 0.06 | 0.05 | 0.10 | 0.28 | 0.54 |
| 965                                            | 6181  | 243043 | 0.08 | 0.27 | 0.78 | 0.98 | 0.09 | 0.32 | 0.84 | 0.99 | 0.04 | 0.09 | 0.24 | 0.47 | 0.24 | 0.87 | 1.00 | 1.00 |
| 965.1                                          | 1370  | 243043 | 0.04 | 0.09 | 0.25 | 0.49 | 0.05 | 0.11 | 0.29 | 0.56 | 0.03 | 0.05 | 0.09 | 0.14 | 0.09 | 0.31 | 0.84 | 0.99 |
| 965.3                                          | 378   | 243043 | 0.03 | 0.05 | 0.10 | 0.17 | 0.04 | 0.06 | 0.11 | 0.20 | 0.03 | 0.04 | 0.05 | 0.07 | 0.05 | 0.12 | 0.34 | 0.64 |
| 966                                            | 507   | 243043 | 0.04 | 0.06 | 0.12 | 0.22 | 0.04 | 0.06 | 0.14 | 0.25 | 0.03 | 0.04 | 0.06 | 0.08 | 0.05 | 0.14 | 0.43 | 0.77 |
| 967                                            | 515   | 243043 | 0.04 | 0.06 | 0.12 | 0.22 | 0.04 | 0.06 | 0.14 | 0.26 | 0.03 | 0.04 | 0.06 | 0.08 | 0.06 | 0.15 | 0.44 | 0.77 |
| 969                                            | 1748  | 243043 | 0.05 | 0.11 | 0.31 | 0.59 | 0.05 | 0.12 | 0.36 | 0.67 | 0.03 | 0.05 | 0.10 | 0.17 | 0.10 | 0.38 | 0.91 | 1.00 |
| 971                                            | 511   | 243043 | 0.04 | 0.06 | 0.12 | 0.22 | 0.04 | 0.06 | 0.14 | 0.25 | 0.03 | 0.04 | 0.06 | 0.08 | 0.05 | 0.14 | 0.44 | 0.77 |
| 972                                            | 828   | 243043 | 0.04 | 0.07 | 0.17 | 0.33 | 0.04 | 0.08 | 0.19 | 0.38 | 0.03 | 0.04 | 0.07 | 0.10 | 0.07 | 0.21 | 0.63 | 0.93 |
| 973                                            | 211   | 243043 | 0.03 | 0.04 | 0.07 | 0.12 | 0.03 | 0.05 | 0.08 | 0.13 | 0.03 | 0.03 | 0.04 | 0.05 | 0.04 | 0.08 | 0.21 | 0.41 |
| 977                                            | 5864  | 243043 | 0.08 | 0.26 | 0.76 | 0.98 | 0.08 | 0.30 | 0.83 | 0.99 | 0.04 | 0.09 | 0.23 | 0.45 | 0.23 | 0.86 | 1.00 | 1.00 |
| 979                                            | 692   | 243043 | 0.04 | 0.07 | 0.15 | 0.28 | 0.04 | 0.07 | 0.17 | 0.33 | 0.03 | 0.04 | 0.06 | 0.09 | 0.06 | 0.18 | 0.55 | 0.88 |
| 981                                            | 262   | 243043 | 0.03 | 0.05 | 0.08 | 0.13 | 0.03 | 0.05 | 0.09 | 0.15 | 0.03 | 0.03 | 0.04 | 0.06 | 0.04 | 0.09 | 0.25 | 0.49 |
| 990                                            | 3850  | 243043 | 0.06 | 0.19 | 0.58 | 0.90 | 0.07 | 0.22 | 0.65 | 0.94 | 0.04 | 0.07 | 0.17 | 0.32 | 0.16 | 0.69 | 1.00 | 1.00 |
| 994                                            | 3970  | 243043 | 0.06 | 0.19 | 0.59 | 0.91 | 0.07 | 0.22 | 0.67 | 0.95 | 0.04 | 0.07 | 0.17 | 0.33 | 0.17 | 0.70 | 1.00 | 1.00 |
| 994.2                                          | 3970  | 243043 | 0.06 | 0.19 | 0.59 | 0.91 | 0.07 | 0.22 | 0.67 | 0.95 | 0.04 | 0.07 | 0.17 | 0.33 | 0.17 | 0.70 | 1.00 | 1.00 |
| <b>Total no of phecodes with power &gt;80%</b> |       |        | 0    | 17   | 151  | 319  | 0    | 24   | 178  | 367  | 0    | 0    | 10   | 60   | 10   | 186  | 557  | 801  |

**Supplementary Table 6:** Associations of each genetic instrument (PCSK9, HMGCR, NPC1L1, and LDLR) with cardiovascular related biomarkers (from the IVWMR analyses).

|                                         | PCSK9 genetic instrument |         |             | HMGCR genetic instrument |          |             | NPC1L1 genetic instrument |         |             | LDLR genetic instrument |         |             |
|-----------------------------------------|--------------------------|---------|-------------|--------------------------|----------|-------------|---------------------------|---------|-------------|-------------------------|---------|-------------|
|                                         | beta (95% CI)            | P       | F-statistic | beta (95% CI)            | P        | F-statistic | beta (95% CI)             | P       | F-statistic | beta (95% CI)           | P       | F-statistic |
| Cholesterol (mmol/L)                    | -0.02 (-0.02, -0.02)     | 3.3E-62 | 324.08      | -0.03 (-0.03, -0.03)     | 1.7E-132 | 421.95      | -0.02 (-0.02, -0.02)      | 4.2E-27 | 61.88       | -0.03 (-0.03, -0.02)    | 6.1E-38 | 1649.14     |
| Direct Low-Density Lipoprotein (mmol/L) | -0.02 (-0.02, -0.01)     | 1.8E-61 | 400.03      | -0.02 (-0.02, -0.02)     | 4.6E-170 | 481.80      | -0.02 (-0.02, -0.01)      | 2.8E-36 | 84.42       | -0.02 (-0.02, -0.02)    | 4.4E-58 | 2077.99     |
| HDL-Cholesterol (mmol/L)                | 0.00 (-0.00, 0.00)       | 0.21    | 1.16        | -0.00 (-0.00, -0.00)     | 7.5E-07  | 8.77        | 0.00 (0.00, 0.00)         | 2.3E-03 | 4.97        | 0.00 (-0.00, 0.00)      | 0.57    | 1.21        |
| Triglyceride (mmol/L)                   | 0.00 (-0.00, 0.00)       | 0.06    | 2.99        | -0.00 (-0.00, 0.00)      | 0.17     | 1.50        | -0.00 (-0.01, 0.00)       | 0.05    | 5.81        | -0.00 (-0.00, 0.00)     | 0.32    | 0.99        |
| Apolipoprotein A (g/L)                  | 0.00 (0.00, 0.00)        | 1.6E-05 | 5.70        | 0.00 (0.00, 0.00)        | 2.7E-03  | 2.07        | 0.00 (0.00, 0.00)         | 2.1E-04 | 6.05        | 0.00 (0.00, 0.00)       | 7.2E-09 | 47.04       |
| Apolipoprotein B (g/L)                  | -0.00 (-0.00, -0.00)     | 9.7E-57 | 378.48      | -0.01 (-0.01, -0.00)     | 5.3E-154 | 371.08      | -0.00 (-0.00, -0.00)      | 1.9E-26 | 61.09       | -0.01 (-0.01, -0.01)    | 6.5E-67 | 2011.47     |
| C-reactive Protein (mg/L)               | 0.01 (0.00, 0.02)        | 4.7E-03 | 6.35        | 0.00 (-0.00, 0.01)       | 0.19     | 0.57        | 0.01 (-0.02, 0.04)        | 0.42    | 2.38        | -0.00 (-0.00, 0.00)     | 0.88    | 0.18        |
| Lipoprotein (a) (nmol/L)                | -0.05 (-0.11, 0.02)      | 0.15    | 1.24        | -0.11 (-0.18, -0.04)     | 2.5E-03  | 3.37        | -0.00 (-0.17, 0.17)       | 0.98    | 0.05        | -0.09 (-0.14, -0.04)    | 1.0E-03 | 9.54        |

**Supplementary Table 7:** Associations between each LDL-C lowering genetic risk score and known confounders.

|                            | PCSK9 GRS               |                          | HMGCR GRS                            |                           | NPC1L1 GRS              |      | LDLR GRS                |       |
|----------------------------|-------------------------|--------------------------|--------------------------------------|---------------------------|-------------------------|------|-------------------------|-------|
|                            | OR/beta (95% CI)        | P                        | OR/beta (95% CI)                     | P                         | OR/beta (95% CI)        | P    | OR/beta (95% CI)        | P     |
| Age <sup>a</sup>           | -0.002 (-0.013, 0.009)  | 0.76                     | -0.015 (-0.025, -0.004) <sup>c</sup> | 0.007/ 0.049 <sup>b</sup> | -0.005 (-0.025, 0.015)  | 0.64 | -0.027 (-0.050, -0.004) | 0.023 |
| Sex                        | -0.002 (-0.005, 0.0004) | 0.091                    | 0.0005 (-0.002, 0.003)               | 0.74                      | -0.002 (-0.007, 0.003)  | 0.54 | 0.0006 (-0.005, 0.007)  | 0.83  |
| Smoking                    | -0.0009 (-0.004, 0.002) | 0.56                     | 0.002 (-0.001, 0.004)                | 0.31                      | -0.0004 (-0.006, 0.005) | 0.88 | 0.004 (-0.002, 0.010)   | 0.20  |
| Alcohol                    | 0.003 (-0.003, 0.008)   | 0.34                     | 0.002 (-0.003, 0.008)                | 0.38                      | 0.003 (-0.007, 0.014)   | 0.51 | 0.0002 (-0.012, 0.012)  | 0.98  |
| Physical activity          | 0.001 (-0.001, 0.004)   | 0.34                     | -0.001 (-0.004, 0.002)               | 0.51                      | -0.001 (-0.006, 0.005)  | 0.81 | -0.003 (-0.009, 0.003)  | 0.27  |
| Education                  | 0.0001 (-0.003, 0.003)  | 0.97                     | -0.002 (-0.005, 0.0003)              | 0.08                      | -0.002 (-0.007, 0.003)  | 0.45 | -0.004 (-0.010, 0.002)  | 0.17  |
| Townsend deprivation index | 0.004 (0.0008, 0.006)   | 0.01 / 0.07 <sup>b</sup> | -0.0003 (-0.003, 0.002)              | 0.82                      | 0.003 (-0.002, 0.008)   | 0.29 | 0.003 (-0.003, 0.009)   | 0.40  |

<sup>a</sup> Effect estimate for models with age is from linear regression. All other estimates from logistic regression where variables were grouped as: Smoking (never vs. ex-or current smoker). Alcohol consumption (never vs. ex- or current drinker), physical activity (below vs. above the median MET/week), education (College or University degree vs. other levels including none), and Townsend deprivation index (less deprived vs more deprived; using a median). All adjusted for assessment center, types of SNP array, 15 principal components.

<sup>b</sup> Bonferroni corrected. Bonferroni threshold = 0.007.

<sup>c</sup> Odds per one allele higher, adjusted for LDL-C = -0.009 (-0.020, 0.002), P = 0.1

**Supplementary Table 8:** MR analyses using MR IVW, weighted medium, weighted mode, MR-Egger and MR-PRESSO approaches, for 13 disease outcomes identified in the PheWAS of LDL-C lowering variants under FDR corrected thresholds.

| GRS    | Phecode | Description                                       | Cases, n | Controls, n | P_PheWAS | MR IVW            |         | Weighted median   |         | Weighted mode     |         | MR-Egger          |         | MR-PRESSO               |                         |      |
|--------|---------|---------------------------------------------------|----------|-------------|----------|-------------------|---------|-------------------|---------|-------------------|---------|-------------------|---------|-------------------------|-------------------------|------|
|        |         |                                                   |          |             |          | OR (95% CI)       | P       | OR (95% CI)       | P       | OR (95% CI)       | P       | OR (95% CI)       | P       | P <sub>pleiotropy</sub> | P <sub>distortion</sub> |      |
| PCSK9  | 272     | Disorders of lipid metabolism                     | 35143    | 261466      | 1.0E-11  | 0.98 (0.98, 0.98) | 4.3E-25 | 0.98 (0.97, 0.98) | 1.4E-16 | 0.98 (0.97, 0.99) | 1.2E-03 | 0.99 (0.95, 1.02) | 1.5E-01 | 0.98 (0.98, 0.98)       | 4.2E-06                 | 0.38 |
|        | 272.1   | Hyperlipidemia                                    | 35033    | 261466      | 6.6E-12  | 0.98 (0.98, 0.98) | 1.7E-25 | 0.98 (0.97, 0.98) | 1.6E-17 | 0.98 (0.97, 0.99) | 1.0E-03 | 0.99 (0.95, 1.02) | 1.4E-01 | 0.98 (0.98, 0.98)       | 4.2E-06                 | 0.38 |
|        | 272.11  | Hypercholesterolemia                              | 32554    | 261466      | 4.2E-11  | 0.98 (0.98, 0.98) | 3.3E-24 | 0.98 (0.98, 0.99) | 3.2E-16 | 0.98 (0.97, 0.99) | 8.2E-04 | 0.99 (0.96, 1.02) | 2.2E-01 | 0.98 (0.97, 0.98)       | 1.4E-05                 | 0.27 |
|        | 401.2   | Hypertensive heart and/or renal disease           | 1667     | 202269      | 1.6E-04  | 0.96 (0.94, 0.97) | 9.7E-08 | 0.96 (0.94, 0.98) | 8.8E-05 | 0.97 (0.92, 1.02) | 7.2E-02 | 0.95 (0.82, 1.09) | 1.7E-01 | 0.96 (0.93, 0.98)       | 1.1E-03                 | 0.80 |
|        | 411     | Ischemic Heart Disease                            | 30489    | 202269      | 3.3E-06  | 0.99 (0.98, 0.99) | 9.7E-10 | 0.99 (0.98, 0.99) | 1.1E-07 | 0.98 (0.97, 1.00) | 8.5E-03 | 0.99 (0.96, 1.03) | 4.5E-01 | 0.99 (0.98, 0.99)       | 8.4E-04                 | 0.50 |
|        | 411.1   | Unstable angina (intermediate coronary syndrome)  | 4478     | 202269      | 7.5E-01  | 1.00 (0.99, 1.01) | 9.8E-01 | 1.00 (0.99, 1.02) | 4.6E-01 | 1.01 (0.98, 1.04) | 5.1E-01 | 1.02 (0.93, 1.12) | 4.4E-01 | 1.00 (0.98, 1.02)       | 9.9E-01                 | 0.42 |
|        | 411.2   | Myocardial infarction                             | 12033    | 202269      | 1.3E-02  | 0.99 (0.98, 1.00) | 6.7E-03 | 0.99 (0.98, 1.00) | 1.3E-02 | 0.99 (0.97, 1.01) | 1.5E-01 | 1.01 (0.96, 1.07) | 3.9E-01 | 0.99 (0.98, 1.00)       | 3.5E-02                 | 0.13 |
|        | 411.3   | Angina pectoris                                   | 15180    | 202269      | 8.6E-06  | 0.98 (0.98, 0.99) | 5.6E-10 | 0.98 (0.97, 0.99) | 9.2E-08 | 0.98 (0.97, 0.99) | 4.7E-03 | 0.99 (0.94, 1.04) | 2.8E-01 | 0.98 (0.98, 0.99)       | 6.1E-05                 | 0.71 |
|        | 411.4   | Coronary atherosclerosis                          | 19684    | 202269      | 9.4E-04  | 0.99 (0.98, 0.99) | 1.6E-05 | 0.99 (0.98, 0.99) | 1.7E-04 | 0.99 (0.97, 1.00) | 3.2E-02 | 1.00 (0.95, 1.04) | 7.6E-01 | 0.99 (0.98, 1.00)       | 2.8E-03                 | 0.45 |
|        | 411.8   | Other chronic ischemic heart disease, unspecified | 15139    | 202269      | 2.0E-04  | 0.99 (0.98, 0.99) | 8.9E-07 | 0.99 (0.98, 0.99) | 1.2E-04 | 0.98 (0.96, 1.00) | 1.0E-02 | 1.00 (0.95, 1.05) | 7.0E-01 | 0.99 (0.98, 0.99)       | 2.9E-04                 | 0.42 |
|        | 442.11  | Abdominal aortic aneurysm                         | 1047     | 202269      | 2.4E-01  | 0.98 (0.96, 1.01) | 2.9E-01 | 0.99 (0.96, 1.02) | 4.6E-01 | 1.00 (0.92, 1.08) | 8.8E-01 | 0.94 (0.73, 1.21) | 3.3E-01 | 0.98 (0.94, 1.03)       | 3.3E-01                 | 0.43 |
|        | 443     | Peripheral vascular disease                       | 4031     | 202269      | 1.6E-01  | 0.99 (0.98, 1.00) | 8.7E-02 | 0.99 (0.98, 1.00) | 1.2E-01 | 0.99 (0.96, 1.02) | 2.2E-01 | 0.98 (0.90, 1.08) | 4.6E-01 | 0.99 (0.98, 1.00)       | 3.1E-02                 | 0.72 |
|        | 561.1   | Diarrhea                                          | 536      | 191014      | 6.8E-01  | 1.01 (0.98, 1.04) | 6.8E-01 | 0.99 (0.96, 1.03) | 7.9E-01 | 1.00 (0.93, 1.06) | 8.6E-01 | 0.93 (0.72, 1.18) | 2.3E-01 | 1.01 (0.97, 1.04)       | 6.2E-01                 | 0.19 |
| HMGR   | 272     | Disorders of lipid metabolism                     | 35143    | 261466      | 2.2E-08  | 0.98 (0.97, 0.98) | 3.1E-26 | 0.98 (0.97, 0.98) | 3.3E-17 | 0.98 (0.97, 0.99) | 9.4E-04 | 0.97 (0.92, 1.02) | 6.5E-02 | 0.98 (0.97, 0.98)       | 3.5E-06                 | 0.51 |
|        | 272.1   | Hyperlipidemia                                    | 35033    | 261466      | 2.2E-08  | 0.98 (0.97, 0.98) | 2.2E-26 | 0.98 (0.97, 0.98) | 1.5E-16 | 0.98 (0.97, 0.99) | 8.2E-04 | 0.97 (0.92, 1.02) | 6.4E-02 | 0.98 (0.97, 0.98)       | 3.4E-06                 | 0.50 |
|        | 272.11  | Hypercholesterolemia                              | 32554    | 261466      | 1.5E-08  | 0.98 (0.97, 0.98) | 9.0E-26 | 0.98 (0.97, 0.98) | 8.9E-16 | 0.98 (0.96, 0.99) | 1.2E-03 | 0.97 (0.91, 1.03) | 7.1E-02 | 0.98 (0.97, 0.98)       | 1.0E-05                 | 0.55 |
|        | 401.2   | Hypertensive heart and/or renal disease           | 1667     | 202269      | 4.9E-01  | 0.98 (0.96, 1.00) | 6.7E-02 | 0.98 (0.96, 1.00) | 1.1E-01 | 0.98 (0.94, 1.03) | 2.3E-01 | 0.94 (0.73, 1.21) | 3.4E-01 | 0.98 (0.95, 1.01)       | 1.3E-01                 | 0.47 |
|        | 411     | Ischemic Heart Disease                            | 30489    | 202269      | 4.9E-02  | 0.99 (0.98, 1.00) | 6.7E-03 | 0.99 (0.99, 1.00) | 1.8E-02 | 0.99 (0.98, 1.00) | 6.3E-02 | 0.97 (0.88, 1.06) | 2.2E-01 | 0.99 (0.98, 1.00)       | 4.2E-02                 | 0.38 |
|        | 411.1   | Unstable angina (intermediate coronary syndrome)  | 4478     | 202269      | 5.9E-01  | 0.99 (0.98, 1.00) | 2.7E-01 | 0.99 (0.98, 1.01) | 2.8E-01 | 0.99 (0.96, 1.02) | 3.3E-01 | 0.98 (0.85, 1.14) | 6.6E-01 | 0.99 (0.98, 1.01)       | 2.5E-01                 | 0.79 |
|        | 411.2   | Myocardial infarction                             | 12033    | 202269      | 3.0E-01  | 0.99 (0.98, 1.00) | 1.0E-01 | 0.99 (0.98, 1.00) | 1.9E-01 | 0.99 (0.98, 1.01) | 3.5E-01 | 0.97 (0.86, 1.08) | 2.4E-01 | 0.99 (0.98, 1.01)       | 1.7E-01                 | 0.33 |
|        | 411.3   | Angina pectoris                                   | 15180    | 202269      | 5.0E-03  | 0.98 (0.97, 0.99) | 3.4E-08 | 0.98 (0.97, 0.99) | 4.8E-06 | 0.98 (0.97, 1.00) | 1.3E-02 | 0.97 (0.88, 1.05) | 1.6E-01 | 0.98 (0.97, 0.99)       | 2.7E-03                 | 0.46 |
|        | 411.4   | Coronary atherosclerosis                          | 19684    | 202269      | 1.5E-02  | 0.99 (0.98, 0.99) | 1.9E-05 | 0.99 (0.98, 1.00) | 1.6E-03 | 0.99 (0.97, 1.00) | 4.2E-02 | 0.96 (0.89, 1.04) | 1.0E-01 | 0.99 (0.98, 1.00)       | 7.9E-03                 | 0.26 |
|        | 411.8   | Other chronic ischemic heart disease, unspecified | 15139    | 202269      | 1.5E-01  | 0.99 (0.98, 1.00) | 4.9E-03 | 0.99 (0.98, 1.00) | 4.3E-02 | 0.99 (0.98, 1.01) | 1.3E-01 | 0.98 (0.89, 1.08) | 4.2E-01 | 0.99 (0.98, 1.00)       | 3.7E-02                 | 0.67 |
|        | 442.11  | Abdominal aortic aneurysm                         | 1047     | 202269      | 8.2E-02  | 0.96 (0.94, 0.99) | 1.3E-03 | 0.96 (0.94, 0.99) | 4.0E-03 | 0.96 (0.91, 1.02) | 8.0E-02 | 0.98 (0.73, 1.31) | 7.9E-01 | 0.96 (0.94, 0.99)       | 6.4E-03                 | 0.80 |
|        | 443     | Peripheral vascular disease                       | 4031     | 202269      | 6.5E-01  | 0.99 (0.98, 1.01) | 3.0E-01 | 1.00 (0.98, 1.01) | 6.9E-01 | 1.00 (0.97, 1.02) | 6.3E-01 | 0.95 (0.80, 1.14) | 3.1E-01 | 0.99 (0.97, 1.02)       | 3.4E-01                 | 0.38 |
|        | 561.1   | Diarrhea                                          | 536      | 191014      | 1.1E-01  | 0.96 (0.93, 0.99) | 5.1E-03 | 0.97 (0.93, 1.01) | 1.7E-01 | 0.97 (0.90, 1.05) | 2.9E-01 | 1.06 (0.71, 1.58) | 5.6E-01 | 0.96 (0.91, 1.00)       | 2.5E-02                 | 0.32 |
| NPC1L1 | 272     | Disorders of lipid metabolism                     | 35143    | 261466      | 3.4E-03  | 0.98 (0.97, 0.99) | 1.4E-03 | 0.98 (0.97, 1.00) | 7.5E-03 | 0.98 (0.96, 1.01) | 1.1E-01 | 1.03 (0.84, 1.27) | 5.7E-01 | 0.98 (0.97, 1.00)       | 4.5E-02                 | 0.41 |
|        | 272.1   | Hyperlipidemia                                    | 35033    | 261466      | 3.4E-03  | 0.98 (0.97, 0.99) | 1.3E-03 | 0.98 (0.97, 1.00) | 6.3E-03 | 0.98 (0.96, 1.01) | 9.5E-02 | 1.03 (0.84, 1.27) | 6.0E-01 | 0.98 (0.97, 1.00)       | 3.9E-02                 | 0.43 |
|        | 272.11  | Hypercholesterolemia                              | 32554    | 261466      | 2.1E-03  | 0.98 (0.97, 0.99) | 7.4E-04 | 0.98 (0.97, 1.00) | 7.7E-03 | 0.98 (0.96, 1.01) | 9.2E-02 | 1.02 (0.83, 1.26) | 7.1E-01 | 0.98 (0.97, 1.00)       | 2.4E-02                 | 0.50 |
|        | 401.2   | Hypertensive heart and/or renal disease           | 1667     | 202269      | 8.1E-02  | 0.95 (0.91, 0.99) | 1.1E-02 | 0.94 (0.89, 0.99) | 1.5E-02 | 0.98 (0.89, 1.07) | 4.9E-01 | 0.96 (0.39, 2.33) | 8.6E-01 | 0.95 (0.89, 1.00)       | 6.1E-02                 | 0.96 |
|        | 411     | Ischemic Heart Disease                            | 30489    | 202269      | 3.8E-02  | 0.98 (0.96, 1.00) | 1.0E-01 | 0.97 (0.96, 0.99) | 3.6E-03 | 0.97 (0.94, 1.00) | 5.3E-02 | 1.06 (0.69, 1.62) | 6.3E-01 | 0.98 (0.95, 1.02)       | 2.0E-01                 | 0.54 |
|        | 411.1   | Unstable angina (intermediate coronary syndrome)  | 4478     | 202269      | 3.9E-01  | 0.98 (0.93, 1.03) | 4.9E-01 | 0.95 (0.92, 0.99) | 1.8E-02 | 0.95 (0.90, 1.01) | 7.6E-02 | 1.20 (0.40, 3.59) | 5.5E-01 | 0.98 (0.90, 1.07)       | 5.4E-01                 | 0.51 |
|        | 411.2   | Myocardial infarction                             | 12033    | 202269      | 9.8E-02  | 0.98 (0.96, 1.01) | 1.4E-01 | 0.99 (0.97, 1.02) | 4.2E-01 | 0.96 (0.92, 1.00) | 6.3E-02 | 1.00 (0.57, 1.78) | 9.9E-01 | 0.98 (0.94, 1.02)       | 2.4E-01                 | 0.89 |
|        | 411.3   | Angina pectoris                                   | 15180    | 202269      | 1.2E-01  | 0.98 (0.97, 1.00) | 8.0E-02 | 0.97 (0.96, 0.99) | 1.1E-02 | 0.97 (0.94, 1.01) | 9.4E-02 | 1.07 (0.74, 1.54) | 5.4E-01 | 0.98 (0.95, 1.01)       | 1.8E-01                 | 0.45 |
|        | 411.4   | Coronary atherosclerosis                          | 19684    | 202269      | 2.1E-02  | 0.98 (0.96, 1.00) | 5.8E-02 | 0.97 (0.95, 0.99) | 1.8E-03 | 0.96 (0.93, 1.00) | 4.4E-02 | 1.06 (0.65, 1.74) | 6.6E-01 | 0.98 (0.94, 1.02)       | 1.5E-01                 | 0.55 |
|        | 411.8   | Other chronic ischemic heart disease, unspecified | 15139    | 202269      | 4.7E-02  | 0.98 (0.96, 1.00) | 4.2E-02 | 0.98 (0.96, 1.00) | 3.8E-02 | 0.97 (0.93, 1.01) | 8.3E-02 | 1.09 (0.75, 1.58) | 4.1E-01 | 0.98 (0.95, 1.01)       | 1.3E-01                 | 0.32 |
|        | 442.11  | Abdominal aortic aneurysm                         | 1047     | 202269      | 1.4E-01  | 0.95 (0.90, 1.01) | 1.0E-01 | 0.95 (0.89, 1.02) | 1.6E-01 | 0.95 (0.84, 1.07) | 2.6E-01 | 1.00 (0.34, 2.95) | 1.0E+00 | 0.95 (0.94, 0.97)       | 4.9E-03                 | 0.87 |
|        | 443     | Peripheral vascular disease                       | 4031     | 202269      | 5.5E-01  | 1.01 (0.98, 1.04) | 4.6E-01 | 1.02 (0.98, 1.05) | 3.8E-01 | 1.02 (0.96, 1.08) | 3.8E-01 | 1.13 (0.64, 1.98) | 4.6E-01 | 1.01 (0.98, 1.04)       | 3.2E-01                 | 0.49 |
|        | 561.1   | Diarrhea                                          | 536      | 191014      | 1.0E-04  | 1.23 (1.14, 1.33) | 4.0E-07 | 1.23 (1.12, 1.35) | 2.0E-05 | 1.23 (1.03, 1.47) | 3.4E-02 | 1.62 (0.31, 8.35) | 3.3E-01 | 1.23 (1.14, 1.33)       | 3.6E-03                 | 0.54 |
| LDLR   | 272     | Disorders of lipid metabolism                     | 35143    | 261466      | 1.7E-51  | 0.97 (0.97, 0.97) | 4.2E-67 | 0.97 (0.97, 0.97) | 9.5E-50 | 0.97 (0.96, 0.98) | 5.8E-03 | 0.97 (0.96, 0.99) | 7.8E-02 |                         |                         | 0.99 |
|        | 272.1   | Hyperlipidemia                                    | 35033    | 261466      | 2.1E-51  | 0.97 (0.97, 0.97) | 5.6E-67 | 0.97 (0.97, 0.97) | 1.3E-52 | 0.97 (0.96, 0.98) | 4.7E-03 | 0.97 (0.96, 0.99) | 7.6E-02 |                         |                         | 0.99 |
|        | 272.11  | Hypercholesterolemia                              | 32554    | 261466      | 2.8E-53  | 0.97 (0.97, 0.97) | 1.7E-69 | 0.97 (0.97, 0.97) | 8.4E-55 | 0.97 (0.96, 0.98) | 5.2E-03 | 0.97 (0.95, 0.99) | 8.3E-02 |                         |                         | 0.96 |
|        | 401.2   | Hypertensive heart and/or renal disease           | 1667     | 202269      | 2.8E-01  | 0.99 (0.98, 1.00) | 2.0E-01 | 0.99 (0.98, 1.00) | 1.8E-01 | 0.99 (0.97, 1.02) | 3.3E-01 | 0.99 (0.94, 1.04) | 5.1E-01 |                         |                         | 0.81 |
|        | 411     | Ischemic Heart Disease                            | 30489    | 202269      | 1.0E-12  | 0.98 (0.98, 0.99) | 3.6E-14 | 0.99 (0.98, 0.99) | 6.4E-13 | 0.99 (0.98, 0.99) | 2.1E-02 | 0.99 (0.97, 1.01) | 2.1E-01 |                         |                         | 0.85 |
|        | 411.1   | Unstable angina (intermediate coronary syndrome)  | 4478     | 202269      | 9.3E-05  | 0.98 (0.97, 0.99) | 3.8E-03 | 0.98 (0.97, 0.99) | 3.4E-05 | 0.98 (0.97, 1.00) | 8.2E-02 | 0.99 (0.96, 1.03) | 5.9E-01 |                         |                         | 0.27 |
|        | 411.2   | Myocardial infarction                             | 12033    | 202269      | 7.2E-10  | 0.98 (0.97, 0.99) | 1.3E-12 | 0.98 (0.98, 0.99) | 4.0E-09 | 0.98 (0.97, 0.99) | 3.2E-02 | 0.98 (0.96, 1.01) | 2.2E-01 |                         |                         | 0.71 |
|        | 411.3   | Angina pectoris                                   | 15180    | 202269      | 9.1E-08  | 0.98 (0.98, 0.99) | 7.2E-10 | 0.98 (0.98, 0.99) | 6.3E-09 | 0.99 (0.98, 0.99) | 3.6E-02 | 0.99 (0.97, 1.01) | 2.0E-01 |                         |                         | 0.73 |
|        | 411.4   | Coronary atherosclerosis                          | 19684    | 202269      | 1.2E-15  | 0.98 (0.97, 0.98) | 3.7E-20 | 0.98 (0.98, 0.98) | 2.2E-17 | 0.98 (0.97, 0.99) | 1.6E-02 | 0.98 (0.96, 1.00) | 1.3E-01 |                         |                         | 0.66 |
|        | 411.8   | Other chronic ischemic heart disease, unspecified | 15139    | 202269      | 8.5E-10  | 0.98 (0.98, 0.99) | 2.2E-12 | 0.98 (0.98, 0.99) | 1.2E-10 | 0.98 (0.97, 0.99) | 2.9E-02 | 0.98 (0.96, 1.00) | 1.7E-01 |                         |                         | 0.85 |
|        | 442.11  | Abdominal aortic aneurysm                         | 1047     | 202269      | 6.1E-05  | 0.96 (0.94, 0.98) | 4.4E-06 | 0.96 (0.94, 0.97) | 4.2E-06 | 0.95 (0.92, 0.99) | 5.4E-02 | 0.95 (0           |         |                         |                         |      |



**Supplementary Table 9:** Replication of MR analyses for disease phenotypes available in the MR-Base repository.

| GRS   | Disease phenotype                       | Consortium | Harmonized<br>SNP, n | Cases, n | Controls, n | MR IVW            |         | Weighted median   | Weighted mode     | MR-Egger          | MR-PRESSO                | OR (95% CI) outliers |                         |                         |
|-------|-----------------------------------------|------------|----------------------|----------|-------------|-------------------|---------|-------------------|-------------------|-------------------|--------------------------|----------------------|-------------------------|-------------------------|
|       |                                         |            |                      |          |             | OR (95% CI)       | P       | OR (95% CI)       | OR (95% CI)       | OR (95% CI)       | Outliers                 | removed              | P <sub>pleiotropy</sub> | P <sub>distortion</sub> |
| PCSK9 | Pure hypercholesterolaemia              | FinnGen*   | 4                    | 3262     | 91366       | 0.97 (0.95, 1.00) | 0.03    | 0.96 (0.94, 0.99) | 0.96 (0.91, 1.02) | 1.02 (0.78, 1.35) | None                     | 0.97 (0.94, 1.01)    | 0.11                    | NA                      |
|       | Hyperlipidaemia, other/unspecified      | FinnGen    | 4                    | 1539     | 91366       | 0.98 (0.95, 1.02) | 0.42    | 0.98 (0.94, 1.01) | 0.96 (0.88, 1.05) | 1.12 (0.80, 1.59) | None                     | 0.98 (0.92, 1.05)    | 0.13                    | NA                      |
|       | Angina pectoris                         | FinnGen    | 4                    | 6382     | 85760       | 0.99 (0.97, 1.01) | 0.33    | 0.99 (0.98, 1.01) | 1.00 (0.96, 1.04) | 1.07 (0.90, 1.27) | None                     | 0.99 (0.96, 1.02)    | 0.07                    | NA                      |
|       | Hypertensive heart and/or renal disease | FinnGen    | 4                    | 1798     | 74345       | 0.98 (0.95, 1.01) | 0.22    | 0.97 (0.94, 1.00) | 0.96 (0.89, 1.05) | 1.02 (0.69, 1.53) | None                     | 0.98 (0.93, 1.03)    | 0.16                    | NA                      |
| HMGR  | Ischemic heart diseases                 | FinnGen    | 4                    | 10739    | 85760       | 0.98 (0.97, 1.00) | 0.01    | 0.99 (0.97, 1.00) | 0.99 (0.96, 1.03) | 1.04 (0.90, 1.20) | None                     | 0.98 (0.96, 1.01)    | 0.06                    | NA                      |
|       | Pure hypercholesterolaemia              | FinnGen    | 5                    | 3262     | 91366       | 0.96 (0.95, 0.98) | 3.5E-05 | 0.97 (0.95, 0.98) | 0.97 (0.93, 1.00) | 0.97 (0.71, 1.33) | None                     | 0.96 (0.96, 0.97)    | 0.92                    | NA                      |
| LDLR  | Hyperlipidaemia, other/unspecified      | FinnGen    | 5                    | 1539     | 91366       | 0.97 (0.95, 1.00) | 0.04    | 0.97 (0.95, 1.00) | 0.98 (0.93, 1.03) | 1.04 (0.66, 1.62) | None                     | 0.97 (0.95, 1.00)    | 0.59                    | NA                      |
|       | Pure hypercholesterolaemia              | FinnGen    | 3                    | 3262     | 91366       | 0.96 (0.94, 0.98) | 1.7E-04 | 0.97 (0.95, 0.98) | 0.97 (0.95, 0.99) | 0.98 (0.94, 1.02) | Insufficient no. of SNPs | NA                   | 0.24                    | NA                      |
|       | Hyperlipidaemia, other/unspecified      | FinnGen    | 3                    | 1539     | 91366       | 0.97 (0.96, 0.99) | 3.6E-04 | 0.97 (0.95, 0.99) | 0.97 (0.94, 1.00) | 0.96 (0.90, 1.02) | Insufficient no. of SNPs | NA                   | 0.49                    | NA                      |
|       | Angina pectoris                         | FinnGen    | 3                    | 6382     | 85760       | 0.99 (0.98, 1.00) | 0.01    | 0.99 (0.98, 1.00) | 0.99 (0.98, 1.01) | 0.99 (0.96, 1.03) | Insufficient no. of SNPs | NA                   | 0.75                    | NA                      |
|       | Aortic aneurysm                         | FinnGen    | 3                    | 791      | 92349       | 1.00 (0.98, 1.02) | 0.79    | 1.00 (0.98, 1.03) | 1.01 (0.97, 1.05) | 1.02 (0.94, 1.11) | Insufficient no. of SNPs | NA                   | 0.49                    | NA                      |
|       | Coronary atherosclerosis                | FinnGen    | 3                    | 7661     | 85760       | 0.99 (0.98, 1.00) | 0.003   | 0.99 (0.98, 0.99) | 0.99 (0.98, 1.00) | 1.00 (0.97, 1.03) | Insufficient no. of SNPs | NA                   | 0.34                    | NA                      |
|       | Hypertensive heart and/or renal disease | FinnGen    | 3                    | 1798     | 74345       | 1.00 (0.98, 1.01) | 0.51    | 0.99 (0.98, 1.01) | 0.99 (0.96, 1.02) | 0.99 (0.93, 1.05) | Insufficient no. of SNPs | NA                   | 0.59                    | NA                      |
|       | Ischemic heart diseases                 | FinnGen    | 3                    | 10739    | 85760       | 0.99 (0.98, 1.00) | 0.02    | 0.99 (0.98, 1.00) | 0.99 (0.98, 1.01) | 1.00 (0.97, 1.02) | Insufficient no. of SNPs | NA                   | 0.55                    | NA                      |
|       | Myocardial infarction                   | FinnGen    | 3                    | 4065     | 85760       | 0.98 (0.97, 1.00) | 0.06    | 0.99 (0.97, 1.00) | 0.99 (0.97, 1.01) | 1.00 (0.96, 1.04) | Insufficient no. of SNPs | NA                   | 0.27                    | NA                      |
|       | Unstable angina pectoris                | FinnGen    | 3                    | 2296     | 89324       | 0.98 (0.97, 0.99) | 0.002   | 0.98 (0.97, 0.99) | 0.98 (0.96, 1.00) | 0.98 (0.93, 1.03) | Insufficient no. of SNPs | NA                   | 0.83                    | NA                      |

NA: not applicable

\* The FinnGen study contains genome information (from Finnish biobanks) and linked digital healthcare data (from national health registries), collected from >300,000 participants in Finland.

**Supplementary Table 10:** List of 52 serum, cardiac imaging, brain imaging and clinical biomarkers.

|                                   | <b>Biomarker</b>                                          | <b>Unit</b>       | <b>Sample type</b>    | <b>Method of Data Collection or Analysis</b>                   |
|-----------------------------------|-----------------------------------------------------------|-------------------|-----------------------|----------------------------------------------------------------|
| <b>Serum biomarkers</b>           | Cholesterol                                               | mmol/L            | Serum                 | CHO-POD                                                        |
|                                   | Direct Low-Density Lipoprotein                            | mmol/L            | Serum                 | Enzymatic selective protection                                 |
|                                   | HDL-Cholesterol                                           | mmol/L            | Serum                 | Enzyme immuno-inhibition                                       |
|                                   | Triglyceride                                              | mmol/L            | Serum                 | GPO-POD                                                        |
|                                   | Apolipoprotein A                                          | g/L               | Serum                 | Immunoturbidimetric                                            |
|                                   | Apolipoprotein B                                          | g/L               | Serum                 | Immunoturbidimetric                                            |
|                                   | C-reactive Protein                                        | mg/L              | Serum                 | Immunoturbidimetric - high sensitivity                         |
|                                   | Lipoprotein (a)                                           | nmol/L            | Serum                 | Immunoturbidimetric                                            |
|                                   | Vitamin D                                                 | nmol/L            | Serum                 | CLIA                                                           |
|                                   | Rheumatoid factor                                         | IU/mL             | Serum                 | Immunoturbidimetric                                            |
|                                   | Alkaline Phosphatase                                      | U/L               | Serum                 | AMP (IFCC)                                                     |
|                                   | Calcium                                                   | μmol/L            | Serum                 | Arsenazo III                                                   |
|                                   | SHBG                                                      | nmol/L            | Serum                 | Two-step sandwich immunoassay                                  |
|                                   | Testosterone                                              | pmol/L            | Serum                 | One step competitive                                           |
|                                   | Oestradiol                                                | pmol/L            | Serum                 | Two-step competitive                                           |
|                                   | IGF-1                                                     | pmol/L            | Serum                 | CLIA                                                           |
|                                   | Glycated Haemoglobin (HbA1c)                              | mmol/mol          | Red blood cells (RBC) | HPLC                                                           |
|                                   | Glucose                                                   | mg/dL             | Serum                 | Hexokinase                                                     |
|                                   | Cystatin C                                                | mg/L              | Serum                 | Latex enhanced immunoturbidimetric                             |
|                                   | Creatinine                                                | μmol/L            | Serum                 | Enzymatic                                                      |
|                                   | Total protein                                             | g/L               | Serum                 | Biuret                                                         |
|                                   | Urea                                                      | mmol/L            | Serum                 | GLDH, kinetic                                                  |
|                                   | Phosphate                                                 | mmol/L            | Serum                 | Phosphomolybdate complex                                       |
|                                   | Urate                                                     | μmol/L            | Serum                 | Uricase PAP                                                    |
|                                   | Creatinine (urine)                                        | mmol/L            | Urine                 | Enzymatic                                                      |
|                                   | Sodium (urine)                                            | mmol/L            | Urine                 | ISE                                                            |
|                                   | Potassium (urine)                                         | mmol/L            | Urine                 | ISE                                                            |
|                                   | Albumin                                                   | g/L               | Serum                 | BCG                                                            |
|                                   | Direct Bilirubin                                          | nmol/L            | Serum                 | DPD                                                            |
|                                   | Total Bilirubin                                           | μmol/L            | Serum                 | Photometric colour                                             |
|                                   | Gamma Glutamyltransferase                                 | U/L               | Serum                 | IFCC                                                           |
|                                   | Alanine aminotransferase                                  | U/L               | Serum                 | IFCC                                                           |
| Aspartate aminotransferase        | U/L                                                       | Serum             | IFCC                  |                                                                |
| <b>Cardiac imaging biomarkers</b> | Augmentation index for PWA                                | %                 | Cardiac imaging       | Pulse wave analysis                                            |
|                                   | Central augmentation pressure during PWA                  | mmHg              | Cardiac imaging       | Pulse wave analysis                                            |
|                                   | Mean carotid IMT (intima-medial thickness) at 240 degrees | micrometres       | Cardiac imaging       | Carotid ultrasound                                             |
|                                   | Cardiac output                                            | L/min             | Cardiac imaging       | Left ventricular size and function derived from Heart MRI data |
|                                   | LV end systolic volume                                    | mL                | Cardiac imaging       | Left ventricular size and function derived from Heart MRI data |
|                                   | LV end diastolic volume                                   | mL                | Cardiac imaging       | Left ventricular size and function derived from Heart MRI data |
|                                   | LV ejection fraction                                      | %                 | Cardiac imaging       | Left ventricular size and function derived from Heart MRI data |
| <b>Brain imaging biomarkers</b>   | Total brain volume                                        | cm <sup>3</sup>   | Brain imaging         | T1 structural brain MRI                                        |
|                                   | Grey matter volume                                        | cm <sup>3</sup>   | Brain imaging         | T1 structural brain MRI                                        |
|                                   | White matter volume                                       | cm <sup>3</sup>   | Brain imaging         | T1 structural brain MRI                                        |
|                                   | Hippocampal volume                                        | mm <sup>3</sup>   | Brain imaging         | T1 structural brain MRI                                        |
|                                   | White matter hyperintensity volume                        | mm <sup>3</sup>   | Brain imaging         | T1 + T2_FLAIR brain MRI                                        |
| <b>Clinical</b>                   | Body mass index (BMI)                                     | kg/m <sup>2</sup> | Anthropometric        | Baseline impedance measures                                    |
|                                   | Body fat percentage (%)                                   | %                 | Anthropometric        | Baseline impedance measures                                    |
|                                   | Forced expiratory volume (FEV1)                           | mL                | Spirometry            | Vitalograph Pneumotrac 6800 breath spirometry                  |
|                                   | Forced vital capacity (FVC)                               | mL                | Spirometry            | Vitalograph Pneumotrac 6800 breath spirometry                  |
|                                   | FEV1/FVC ratio                                            |                   | Spirometry            | Vitalograph Pneumotrac 6800 breath spirometry                  |
|                                   | Systolic blood pressure                                   | mmHg              | Clinical              | Automated reading on an Omron device                           |
|                                   | Diastolic blood pressure                                  | mmHg              | Clinical              | Automated reading on an Omron device                           |

**Supplementary Table 11:** MR analyses using MR IVW, weighted medium, weighted mode, MR-Egger and MR-PRESSO approaches, for all 52 serum, urine, cardiac imaging, brain imaging and clinical biomarkers, using the PCSK9 genetic instrument.

| GRS   | Biomarker                                          | Sample size, n | MR IVW                |         | Weighted median        |          | Weighted mode         |         | MR-Egger               |      | MR-PRESSO            |         | P <sub>pleiotropy</sub> | P <sub>distortion</sub> |
|-------|----------------------------------------------------|----------------|-----------------------|---------|------------------------|----------|-----------------------|---------|------------------------|------|----------------------|---------|-------------------------|-------------------------|
|       |                                                    |                | beta (95% CI)         | P       | beta (95% CI)          | P        | beta (95% CI)         | P       | beta (95% CI)          | P    | beta (95% CI)        | P       |                         |                         |
| PCSK9 | Cholesterol                                        | 321,748        | -0.02 (-0.02, -0.02)  | 3.3E-62 | -0.02 (-0.02, -0.02)   | 7.3E-81  | -0.02 (-0.02, -0.01)  | 7.2E-06 | -0.01 (-0.03, 0.00)    | 0.02 | -0.02 (-0.02, -0.01) | 3.0E-06 | 0.24                    | NA                      |
|       | Direct Low-Density Lipoprotein                     | 321,141        | -0.02 (-0.02, -0.01)  | 1.8E-61 | -0.02 (-0.02, -0.01)   | 8.7E-101 | -0.02 (-0.02, -0.01)  | 3.3E-06 | -0.01 (-0.03, 0.00)    | 0.02 | -0.02 (-0.02, -0.01) | 3.1E-06 | 0.40                    | 0.17                    |
|       | HDL-Cholesterol                                    | 294,531        | 0.00 (-0.00, 0.00)    | 0.21    | 0.00 (-0.00, 0.00)     | 0.21     | 0.00 (-0.00, 0.00)    | 0.28    | 0.00 (-0.00, 0.00)     | 0.90 | 0.00 (-0.00, 0.00)   | 0.26    | 0.68                    | NA                      |
|       | Triglyceride                                       | 321,484        | 0.00 (-0.00, 0.00)    | 0.06    | 0.00 (-0.00, 0.00)     | 0.19     | 0.00 (-0.00, 0.00)    | 0.48    | 0.00 (-0.01, 0.01)     | 0.98 | 0.00 (-0.00, 0.00)   | 0.11    | 0.64                    | NA                      |
|       | Apolipoprotein A                                   | 292,911        | 0.00 (0.00, 0.00)     | 1.6E-05 | 0.00 (0.00, 0.00)      | 2.4E-03  | 0.00 (-0.00, 0.00)    | 0.11    | 0.00 (-0.00, 0.00)     | 0.25 | 0.00 (0.00, 0.00)    | 4.5E-03 | 0.81                    | NA                      |
|       | Apolipoprotein B                                   | 320,189        | -0.00 (-0.00, -0.00)  | 9.7E-57 | -0.00 (-0.00, -0.00)   | 6.1E-102 | -0.00 (-0.00, -0.00)  | 2.9E-06 | -0.00 (-0.01, 0.00)    | 0.02 | -0.00 (-0.00, -0.00) | 4.0E-06 | 0.47                    | 0.12                    |
|       | C-reactive Protein                                 | 321,051        | 0.01 (0.00, 0.02)     | 4.7E-03 | 0.01 (0.00, 0.02)      | 0.01     | 0.01 (-0.01, 0.02)    | 0.22    | 0.02 (-0.04, 0.08)     | 0.28 | 0.01 (-0.00, 0.02)   | 0.03    | 0.61                    | NA                      |
|       | Lipoprotein (a)                                    | 255,820        | -0.05 (-0.11, 0.02)   | 0.15    | -0.03 (-0.11, 0.05)    | 0.44     | -0.01 (-0.19, 0.16)   | 0.81    | 0.05 (-0.50, 0.60)     | 0.73 | -0.05 (-0.11, 0.01)  | 0.04    | 0.48                    | NA                      |
|       | Vitamin D                                          | 307,609        | 0.04 (0.01, 0.06)     | 2.0E-03 | 0.03 (0.00, 0.06)      | 0.04     | 0.03 (-0.05, 0.11)    | 0.25    | 0.07 (-0.14, 0.28)     | 0.20 | 0.04 (0.00, 0.07)    | 0.01    | 0.50                    | NA                      |
|       | Rheumatoid factor                                  | 28,705         | 0.06 (-0.01, 0.14)    | 0.09    | 0.07 (-0.02, 0.16)     | 0.12     | 0.07 (-0.12, 0.26)    | 0.27    | 0.15 (-0.50, 0.80)     | 0.37 | 0.06 (-0.00, 0.13)   | 0.02    | 0.59                    | NA                      |
|       | Alkaline Phosphatase                               | 321,762        | 0.03 (-0.00, 0.06)    | 0.08    | 0.02 (-0.02, 0.06)     | 0.28     | 0.02 (-0.08, 0.12)    | 0.52    | 0.07 (-0.19, 0.33)     | 0.32 | 0.03 (-0.02, 0.07)   | 0.12    | 0.52                    | NA                      |
|       | Calcium                                            | 294,549        | -0.00 (-0.00, -0.00)  | 0.04    | -0.00 (-0.00, 0.00)    | 0.10     | -0.00 (-0.00, 0.00)   | 0.28    | -0.00 (-0.00, 0.00)    | 0.67 | -0.00 (-0.00, 0.00)  | 0.08    | 0.96                    | NA                      |
|       | SHBG                                               | 291,824        | 0.03 (0.00, 0.07)     | 0.03    | 0.04 (-0.00, 0.08)     | 0.06     | 0.04 (-0.05, 0.12)    | 0.23    | 0.04 (-0.23, 0.30)     | 0.59 | 0.03 (0.00, 0.07)    | 0.02    | 0.99                    | NA                      |
|       | Testosterone                                       | 291,707        | 0.00 (-0.00, 0.01)    | 0.23    | 0.00 (-0.00, 0.01)     | 0.62     | 0.00 (-0.01, 0.01)    | 0.90    | 0.01 (-0.02, 0.04)     | 0.16 | 0.00 (-0.00, 0.01)   | 0.28    | 0.23                    | NA                      |
|       | Oestradiol                                         | 50,478         | 0.86 (-0.34, 2.07)    | 0.16    | 1.26 (-0.32, 2.84)     | 0.12     | 1.37 (-2.46, 5.21)    | 0.30    | -2.74 (-13.05, 7.57)   | 0.30 | 0.86 (-1.08, 2.80)   | 0.21    | 0.18                    | NA                      |
|       | IGF-1                                              | 320,022        | -0.01 (-0.02, -0.00)  | 6.0E-03 | -0.01 (-0.02, 0.00)    | 0.14     | -0.01 (-0.02, 0.01)   | 0.32    | -0.01 (-0.07, 0.04)    | 0.42 | -0.01 (-0.02, 0.00)  | 0.02    | 0.87                    | NA                      |
|       | Glycated Haemoglobin (HbA1c)                       | 321,610        | -0.00 (-0.01, 0.00)   | 0.46    | -0.00 (-0.01, 0.01)    | 0.38     | -0.01 (-0.02, 0.01)   | 0.36    | -0.02 (-0.08, 0.04)    | 0.21 | -0.00 (-0.01, 0.01)  | 0.44    | 0.26                    | NA                      |
|       | Glucose                                            | 294,346        | -0.00 (-0.01, 0.00)   | 0.46    | -0.00 (-0.01, 0.01)    | 0.38     | -0.01 (-0.02, 0.01)   | 0.36    | -0.02 (-0.08, 0.04)    | 0.21 | -0.00 (-0.01, 0.01)  | 0.44    | 0.10                    | NA                      |
|       | Cystatin C                                         | 321,727        | -0.00 (-0.00, 0.00)   | 0.05    | -0.00 (-0.00, 0.00)    | 0.13     | -0.00 (-0.00, 0.00)   | 0.35    | 0.00 (-0.00, 0.00)     | 0.68 | -0.00 (-0.00, 0.00)  | 0.06    | 0.38                    | NA                      |
|       | Creatinine                                         | 321,583        | -0.00 (-0.00, 0.00)   | 0.28    | -0.00 (-0.00, 0.00)    | 0.79     | 0.00 (-0.00, 0.00)    | 0.93    | 0.00 (-0.00, 0.00)     | 1.00 | -0.00 (-0.00, 0.00)  | 0.32    | 0.80                    | NA                      |
|       | Total protein                                      | 294,331        | -0.01 (-0.02, -0.00)  | 0.02    | -0.01 (-0.01, -0.00)   | 8.0E-03  | -0.01 (-0.02, 0.00)   | 0.06    | -0.02 (-0.09, 0.05)    | 0.25 | -0.01 (-0.02, 0.00)  | 0.06    | 0.48                    | NA                      |
|       | Urea                                               | 321,537        | -0.00 (-0.00, 0.00)   | 0.08    | -0.00 (-0.00, 0.00)    | 0.06     | -0.00 (-0.01, 0.00)   | 0.35    | 0.00 (-0.02, 0.02)     | 0.82 | -0.00 (-0.01, 0.00)  | 0.14    | 0.53                    | NA                      |
|       | Phosphate                                          | 294,096        | -0.00 (-0.00, 0.00)   | 0.65    | -0.00 (-0.00, 0.00)    | 0.50     | -0.00 (-0.00, 0.00)   | 0.65    | 0.00 (-0.00, 0.00)     | 0.18 | -0.00 (-0.00, 0.00)  | 0.62    | 0.15                    | NA                      |
|       | Urate                                              | 321,334        | 0.13 (0.05, 0.21)     | 1.3E-03 | 0.13 (0.04, 0.23)      | 7.8E-03  | 0.18 (-0.04, 0.40)    | 0.04    | 0.20 (-0.47, 0.88)     | 0.25 | 0.13 (0.05, 0.21)    | 2.7E-03 | 0.65                    | NA                      |
|       | Creatinine (urine)                                 | 327,791        | -7.95 (-14.13, -1.77) | 0.01    | -10.01 (-17.81, -2.21) | 0.01     | -12.01 (-28.66, 4.63) | 0.06    | -11.88 (-64.86, 41.11) | 0.38 | -7.95 (-16.63, 0.73) | 0.03    | 0.75                    | NA                      |
|       | Sodium (urine)                                     | 327,096        | -0.02 (-0.07, 0.03)   | 0.44    | -0.04 (-0.09, 0.02)    | 0.23     | -0.04 (-0.16, 0.09)   | 0.36    | -0.03 (-0.44, 0.38)    | 0.78 | -0.02 (-0.08, 0.05)  | 0.40    | 0.92                    | NA                      |
|       | Potassium (urine)                                  | 327,082        | -0.04 (-0.09, 0.01)   | 0.15    | -0.03 (-0.08, 0.02)    | 0.23     | -0.02 (-0.12, 0.09)   | 0.64    | -0.08 (-0.57, 0.41)    | 0.50 | -0.04 (-0.12, 0.05)  | 0.20    | 0.71                    | NA                      |
|       | Albumin                                            | 294,657        | -0.00 (-0.00, 0.00)   | 0.88    | 0.00 (-0.00, 0.01)     | 0.73     | 0.00 (-0.01, 0.01)    | 0.76    | 0.00 (-0.04, 0.04)     | 0.87 | -0.00 (-0.01, 0.01)  | 0.88    | 0.84                    | NA                      |
|       | Direct Bilirubin                                   | 273,743        | 0.00 (0.00, 0.00)     | 5.6E-03 | 0.00 (0.00, 0.00)      | 0.05     | 0.00 (0.00, 0.00)     | 0.28    | 0.00 (-0.01, 0.01)     | 0.79 | 0.00 (0.00, 0.00)    | 5.4E-03 | 0.67                    | NA                      |
|       | Total Bilirubin                                    | 320,401        | -0.00 (-0.01, 0.00)   | 0.31    | -0.00 (-0.01, 0.00)    | 0.31     | -0.00 (-0.02, 0.01)   | 0.39    | -0.00 (-0.05, 0.04)    | 0.64 | -0.00 (-0.01, 0.00)  | 0.14    | 0.82                    | NA                      |
|       | Gamma Glutamyltransferase                          | 321,588        | 0.07 (0.02, 0.12)     | 8.8E-03 | 0.06 (0.00, 0.12)      | 0.05     | 0.06 (-0.05, 0.16)    | 0.15    | -0.09 (-0.50, 0.31)    | 0.38 | 0.07 (-0.01, 0.15)   | 0.04    | 0.14                    | NA                      |
|       | Alanine aminotransferase                           | 321,623        | 0.03 (0.01, 0.04)     | 7.9E-04 | 0.03 (0.01, 0.05)      | 0.01     | 0.03 (-0.02, 0.07)    | 0.09    | 0.01 (-0.13, 0.15)     | 0.78 | 0.03 (0.00, 0.05)    | 0.01    | 0.60                    | NA                      |
|       | Aspartate aminotransferase                         | 320,556        | 0.01 (-0.00, 0.02)    | 0.12    | 0.01 (-0.00, 0.03)     | 0.17     | 0.01 (-0.02, 0.04)    | 0.26    | -0.01 (-0.11, 0.09)    | 0.72 | 0.01 (-0.01, 0.03)   | 0.14    | 0.45                    | NA                      |
|       | Augmentation index for PWA                         | 20,387         | 0.02 (-0.01, 0.06)    | 0.23    | 0.04 (-0.01, 0.09)     | 0.11     | 0.05 (-0.07, 0.17)    | 0.23    | 0.07 (-0.26, 0.40)     | 0.39 | 0.02 (-0.03, 0.08)   | 0.24    | 0.54                    | NA                      |
|       | Central augmentation pressure during PWA           | 20,169         | 0.03 (-0.00, 0.06)    | 0.08    | 0.04 (-0.00, 0.08)     | 0.08     | 0.05 (-0.05, 0.14)    | 0.19    | 0.09 (-0.18, 0.37)     | 0.21 | 0.03 (-0.02, 0.07)   | 0.09    | 0.36                    | NA                      |
|       | Mean carotid IMT (intima-medial thickness) at 240° | 17,863         | -0.81 (-1.50, -0.11)  | 0.02    | -0.93 (-1.74, -0.12)   | 0.02     | -0.81 (-2.84, 1.23)   | 0.25    | -1.60 (-7.90, 4.70)    | 0.33 | -0.81 (-1.93, 0.32)  | 0.06    | 0.60                    | NA                      |
|       | Cardiac output (L/min)                             | 3,350          | -0.00 (-0.01, 0.01)   | 0.46    | -0.01 (-0.02, 0.01)    | 0.45     | -0.01 (-0.04, 0.02)   | 0.46    | -0.03 (-0.13, 0.06)    | 0.18 | -0.00 (-0.02, 0.01)  | 0.40    | 0.22                    | NA                      |
|       | LV end systolic volume (mL)                        | 3,358          | 0.05 (-0.15, 0.25)    | 0.61    | 0.03 (-0.21, 0.26)     | 0.82     | 0.02 (-0.46, 0.50)    | 0.90    | -0.67 (-2.28, 0.95)    | 0.14 | 0.05 (-0.27, 0.38)   | 0.63    | 0.10                    | NA                      |
|       | LV end diastolic volume (mL)                       | 3,362          | -0.10 (-0.44, 0.24)   | 0.55    | -0.14 (-0.54, 0.27)    | 0.51     | -0.14 (-0.90, 0.62)   | 0.57    | -1.20 (-3.89, 1.49)    | 0.11 | -0.10 (-0.65, 0.45)  | 0.57    | 0.13                    | NA                      |
|       | LV ejection fraction (%)                           | 3,331          | -0.05 (-0.12, 0.01)   | 0.09    | -0.03 (-0.10, 0.04)    | 0.37     | -0.03 (-0.18, 0.12)   | 0.51    | 0.11 (-0.43, 0.65)     | 0.42 | -0.05 (-0.13, 0.02)  | 0.05    | 0.23                    | NA                      |
|       | Total brain volume                                 | 27,117         | 0.01 (-0.22, 0.24)    | 0.93    | 0.16 (-0.14, 0.45)     | 0.30     | 0.19 (-0.40, 0.79)    | 0.35    | 0.44 (-1.55, 2.44)     | 0.38 | 0.01 (-0.35, 0.37)   | 0.93    | 0.38                    | NA                      |
|       | Grey matter volume                                 | 27,117         | -0.05 (-0.19, 0.09)   | 0.46    | -0.11 (-0.29, 0.07)    | 0.23     | -0.19 (-0.69, 0.30)   | 0.26    | -0.09 (-1.35, 1.17)    | 0.77 | -0.05 (-0.27, 0.16)  | 0.47    | 0.91                    | NA                      |
|       | White matter volume                                | 27,117         | 0.06 (-0.10, 0.23)    | 0.44    | 0.07 (-0.13, 0.27)     | 0.49     | 0.07 (-0.43, 0.58)    | 0.67    | 0.53 (-0.75, 1.82)     | 0.13 | 0.06 (-0.20, 0.33)   | 0.47    | 0.17                    | NA                      |
|       | Hippocampal volume                                 | 27,106         | -0.00 (-0.01, 0.00)   | 0.44    | -0.00 (-0.01, 0.00)    | 0.07     | -0.00 (-0.01, 0.01)   | 0.30    | -0.01 (-0.05, 0.04)    | 0.60 | -0.00 (-0.01, 0.01)  | 0.47    | 0.71                    | NA                      |
|       | White matter hyperintensity volume                 | 26,783         | 0.04 (0.01, 0.07)     | 0.02    | 0.05 (0.01, 0.09)      | 0.02     | 0.06 (-0.05, 0.17)    | 0.13    | -0.01 (-0.28, 0.26)    | 0.88 | 0.04 (-0.01, 0.08)   | 0.03    | 0.47                    | NA                      |
|       | Body mass index (BMI)                              | 336,381        | 0.00 (-0.00, 0.01)    | 0.14    | 0.00 (-0.00, 0.01)     | 0.17     | 0.00 (-0.01, 0.02)    | 0.33    | 0.01 (-0.04, 0.05)     | 0.63 | 0.00 (0.00, 0.01)    | 4.5E-04 | 0.90                    | NA                      |
|       | Body fat percentage (%)                            | 331,383        | 0.01 (0.00, 0.02)     | 2.2E-03 | 0.01 (0.00, 0.02)      | 0.03     | 0.01 (-0.01, 0.03)    | 0.22    | 0.01 (-0.05, 0.07)     | 0.38 | 0.01 (0.00, 0.02)    | 1.2E-03 | 0.86                    | NA                      |
|       | Forced expiratory volume (FEV1)                    | 255,647        | -1.49 (-2.21, -0.78)  | 4.3E-05 | -1.49 (-2.31, -0.67)   | 3.6E-04  | -1.47 (-3.33, 0.40)   | 0.05    | -1.13 (-7.26, 5.00)    | 0.46 | -1.49 (-1.97, -1.02) | 5.8E-05 | 0.80                    | NA                      |
|       | Forced vital capacity (FVC)                        | 255,647        | -1.42 (-2.29, -0.54)  | 1.5E-03 | -1.40 (-2.51, -0.30)   | 0.01     | -1.33 (-3.63, 0.98)   | 0.12    | -0.93 (-8.45, 6.58)    | 0.62 | -1.42 (-2.65, -0.19) | 0.01    | 0.79                    | NA                      |
|       | FEV1/FVC ratio                                     | 255,647        | -0.00 (-0.00, 0.00)   | 0.11    | -0.00 (-0.00, -0.00)   | 0.04     | -0.00 (-0.00, 0.00)   | 0.16    | -0.00 (-0.00, 0.00)    | 0.64 | -0.00 (-0.00, 0.00)  | 0.16    | 0.91                    | NA                      |
|       | Systolic blood pressure                            | 307,868        | 0.00 (-0.02, 0.03)    | 0.77    | 0.02 (-0.01, 0.05)     | 0.20     | 0.02 (-0.03, 0.08)    | 0.26    | 0.04 (-0.21, 0.29)     | 0.54 | 0.00 (-0.04, 0.05)   | 0.78    | 0.57                    | NA                      |
|       | Diastolic blood pressure                           | 307,876        | -0.00 (-0.02, 0.02)   | 0.94    | 0.01 (-0.01, 0.02)     | 0.54     | 0.01 (-0.03, 0.04)    | 0.60    | 0.02 (-0.13, 0.18)     | 0.57 | -0.00 (-0.03, 0.03)  | 0.94    | 0.55                    | NA                      |

**Supplementary Table 12:** MR analyses using MR IVW, weighted medium, weighted mode, MR-Egger and MR-PRESSO approaches, for all 52 serum, urine, cardiac imaging, brain imaging and clinical biomarkers, using the HMGCR genetic instrument.

| GRS   | Biomarker                                          | Sample size, n | MR IVW               |          | Weighted median      |         | Weighted mode        |         | MR-Egger               |         | MR-PRESSO            |         | P <sub>pleiotropy</sub> | P <sub>distortion</sub> |
|-------|----------------------------------------------------|----------------|----------------------|----------|----------------------|---------|----------------------|---------|------------------------|---------|----------------------|---------|-------------------------|-------------------------|
|       |                                                    |                | beta (95% CI)        | P        | beta (95% CI)        | P       | beta (95% CI)        | P       | beta (95% CI)          | P       | beta (95% CI)        | P       |                         |                         |
| HMGCR | Cholesterol                                        | 321,748        | -0.03 (-0.03, -0.03) | 1.7E-132 | -0.03 (-0.03, -0.03) | 1.6E-73 | -0.03 (-0.03, -0.02) | 1.7E-05 | -0.04 (-0.06, -0.01)   | 4.3E-03 | -0.03 (-0.03, -0.02) | 2.1E-06 | 0.25                    | NA                      |
|       | Direct Low-Density Lipoprotein                     | 321,141        | -0.02 (-0.02, -0.02) | 4.6E-170 | -0.02 (-0.03, -0.02) | 5.8E-75 | -0.02 (-0.03, -0.02) | 1.5E-05 | -0.03 (-0.05, -0.01)   | 3.0E-03 | -0.02 (-0.02, -0.02) | 1.1E-06 | 0.25                    | NA                      |
|       | HDL-Cholesterol                                    | 294,531        | -0.00 (-0.00, -0.00) | 7.5E-07  | -0.00 (-0.00, -0.00) | 1.0E-05 | -0.00 (-0.00, -0.00) | 0.01    | -0.00 (-0.01, 0.01)    | 0.73    | -0.00 (-0.00, -0.00) | 4.3E-03 | 0.71                    | NA                      |
|       | Triglyceride                                       | 321,484        | -0.00 (-0.00, 0.00)  | 0.17     | -0.00 (-0.00, 0.00)  | 0.13    | -0.00 (-0.00, 0.00)  | 0.14    | -0.01 (-0.03, 0.01)    | 0.05    | -0.00 (-0.00, 0.00)  | 0.22    | 0.07                    | NA                      |
|       | Apolipoprotein A                                   | 292,911        | 0.00 (0.00, 0.00)    | 2.7E-03  | 0.00 (0.00, 0.00)    | 0.04    | 0.00 (-0.00, 0.00)   | 0.20    | -0.00 (-0.00, 0.00)    | 0.92    | 0.00 (0.00, 0.00)    | 0.01    | 0.57                    | NA                      |
|       | Apolipoprotein B                                   | 320,189        | -0.01 (-0.01, -0.00) | 5.3E-154 | -0.01 (-0.01, -0.00) | 1.8E-62 | -0.01 (-0.01, -0.00) | 2.1E-05 | -0.01 (-0.01, -0.00)   | 1.8E-03 | -0.01 (-0.01, -0.00) | 1.4E-06 | 0.14                    | NA                      |
|       | C-reactive Protein                                 | 321,051        | 0.00 (-0.00, 0.01)   | 0.19     | 0.00 (-0.00, 0.01)   | 0.46    | 0.00 (-0.01, 0.01)   | 0.54    | -0.02 (-0.09, 0.05)    | 0.32    | 0.00 (-0.00, 0.01)   | 0.22    | 0.24                    | NA                      |
|       | Lipoprotein (a)                                    | 255,820        | -0.11 (-0.18, -0.04) | 2.5E-03  | -0.11 (-0.19, -0.02) | 0.01    | -0.11 (-0.28, 0.06)  | 0.10    | -0.06 (-0.98, 0.86)    | 0.78    | -0.11 (-0.14, -0.09) | 2.6E-05 | 0.83                    | NA                      |
|       | Vitamin D                                          | 307,609        | -0.04 (-0.07, -0.01) | 3.5E-03  | -0.04 (-0.07, 0.00)  | 0.03    | -0.04 (-0.11, 0.02)  | 0.09    | 0.00 (-0.35, 0.35)     | 0.97    | -0.04 (-0.08, -0.00) | 0.02    | 0.61                    | NA                      |
|       | Rheumatoid factor                                  | 28,705         | 0.04 (-0.04, 0.13)   | 0.34     | 0.05 (-0.06, 0.17)   | 0.35    | 0.06 (-0.15, 0.28)   | 0.38    | 0.22 (-0.92, 1.37)     | 0.44    | 0.04 (-0.10, 0.18)   | 0.38    | 0.52                    | NA                      |
|       | Alkaline Phosphatase                               | 321,762        | -0.07 (-0.11, -0.04) | 1.9E-05  | -0.07 (-0.11, -0.02) | 2.4E-03 | -0.06 (-0.15, 0.02)  | 0.06    | -0.06 (-0.50, 0.37)    | 0.56    | -0.07 (-0.12, -0.03) | 2.6E-03 | 0.92                    | NA                      |
|       | Calcium                                            | 294,549        | -0.00 (-0.00, -0.00) | 2.1E-15  | -0.00 (-0.00, -0.00) | 1.4E-09 | -0.00 (-0.00, -0.00) | 3.2E-03 | -0.00 (-0.00, 0.00)    | 0.14    | -0.00 (-0.00, -0.00) | 1.4E-04 | 0.66                    | NA                      |
|       | SHBG                                               | 291,824        | -0.11 (-0.14, -0.08) | 3.9E-10  | -0.13 (-0.17, -0.09) | 3.0E-09 | -0.13 (-0.22, -0.05) | 4.7E-03 | -0.18 (-0.62, 0.26)    | 0.15    | -0.11 (-0.16, -0.06) | 1.1E-03 | 0.53                    | NA                      |
|       | Testosterone                                       | 291,707        | -0.01 (-0.01, -0.01) | 9.0E-09  | -0.01 (-0.01, -0.01) | 1.8E-05 | -0.01 (-0.02, -0.00) | 0.02    | -0.01 (-0.06, 0.04)    | 0.47    | -0.01 (-0.01, -0.01) | 2.2E-05 | 0.86                    | NA                      |
|       | Oestradiol                                         | 50,478         | -1.57 (-2.92, -0.22) | 0.02     | -1.78 (-3.40, -0.16) | 0.03    | -1.95 (-5.31, 1.41)  | 0.12    | -3.16 (-20.48, 14.15)  | 0.48    | -1.57 (-2.70, -0.44) | 6.8E-03 | 0.71                    | NA                      |
|       | IGF-1                                              | 320,022        | -0.01 (-0.02, -0.00) | 0.01     | -0.01 (-0.02, 0.00)  | 0.10    | -0.01 (-0.02, 0.01)  | 0.24    | -0.01 (-0.10, 0.08)    | 0.74    | -0.01 (-0.02, 0.00)  | 0.04    | 0.95                    | NA                      |
|       | Glycated Haemoglobin (HbA1c)                       | 321,610        | 0.03 (0.01, 0.04)    | 3.7E-06  | 0.03 (0.02, 0.04)    | 1.4E-06 | 0.03 (0.01, 0.04)    | 6.0E-03 | 0.01 (-0.15, 0.16)     | 0.89    | 0.03 (0.01, 0.04)    | 5.7E-03 | 0.58                    | NA                      |
|       | Glucose                                            | 294,346        | 0.00 (-0.00, 0.00)   | 0.08     | 0.00 (-0.00, 0.00)   | 0.16    | 0.00 (-0.00, 0.01)   | 0.29    | -0.00 (-0.02, 0.02)    | 0.90    | 0.00 (0.00, 0.00)    | 6.4E-03 | 0.68                    | NA                      |
|       | Cystatin C                                         | 321,727        | 0.00 (-0.00, 0.00)   | 0.19     | 0.00 (-0.00, 0.00)   | 0.14    | 0.00 (-0.00, 0.00)   | 0.22    | -0.00 (-0.00, 0.00)    | 0.94    | 0.00 (-0.00, 0.00)   | 0.25    | 0.78                    | NA                      |
|       | Creatinine                                         | 321,583        | 0.00 (0.00, 0.00)    | 0.02     | 0.00 (0.00, 0.00)    | 0.01    | 0.00 (0.00, 0.00)    | 0.06    | 0.00 (-0.00, 0.00)     | 0.26    | 0.00 (-0.00, 0.00)   | 0.07    | 0.41                    | NA                      |
|       | Total protein                                      | 294,331        | -0.01 (-0.01, 0.00)  | 0.06     | -0.01 (-0.01, -0.00) | 0.02    | -0.01 (-0.02, 0.00)  | 0.09    | -0.03 (-0.10, 0.04)    | 0.11    | -0.01 (-0.02, 0.00)  | 0.12    | 0.17                    | NA                      |
|       | Urea                                               | 321,537        | 0.00 (-0.00, 0.00)   | 0.25     | 0.00 (-0.00, 0.00)   | 0.22    | 0.00 (-0.00, 0.01)   | 0.25    | 0.00 (-0.02, 0.03)     | 0.50    | 0.00 (-0.00, 0.00)   | 0.06    | 0.61                    | NA                      |
|       | Phosphate                                          | 294,096        | 0.00 (-0.00, 0.00)   | 0.92     | -0.00 (-0.00, 0.00)  | 0.92    | -0.00 (-0.00, 0.00)  | 0.81    | -0.00 (-0.00, 0.00)    | 0.25    | 0.00 (-0.00, 0.00)   | 0.89    | 0.24                    | NA                      |
|       | Urate                                              | 321,334        | -0.06 (-0.15, 0.03)  | 0.17     | -0.05 (-0.15, 0.05)  | 0.35    | -0.05 (-0.25, 0.15)  | 0.48    | -0.11 (-1.24, 1.02)    | 0.69    | -0.06 (-0.16, 0.04)  | 0.10    | 0.86                    | NA                      |
|       | Creatinine (urine)                                 | 327,791        | 13.74 (6.74, 20.74)  | 1.2E-04  | 14.81 (5.88, 23.75)  | 1.2E-03 | 16.82 (-0.16, 33.80) | 0.03    | 53.32 (-35.74, 142.38) | 0.06    | 13.74 (2.37, 25.11)  | 0.01    | 0.12                    | NA                      |
|       | Sodium (urine)                                     | 327,096        | 0.18 (0.13, 0.23)    | 6.4E-11  | 0.17 (0.10, 0.23)    | 1.9E-06 | 0.16 (0.04, 0.29)    | 9.0E-03 | 0.06 (-0.63, 0.75)     | 0.73    | 0.18 (0.12, 0.24)    | 2.3E-04 | 0.49                    | NA                      |
|       | Potassium (urine)                                  | 327,082        | 0.05 (0.01, 0.10)    | 0.02     | 0.04 (-0.02, 0.09)   | 0.17    | 0.04 (-0.06, 0.13)   | 0.25    | 0.25 (-0.31, 0.80)     | 0.13    | 0.05 (-0.02, 0.12)   | 0.07    | 0.20                    | NA                      |
|       | Albumin                                            | 294,657        | -0.00 (-0.01, -0.00) | 0.02     | -0.00 (-0.01, -0.00) | 0.05    | -0.00 (-0.01, 0.00)  | 0.15    | -0.00 (-0.05, 0.04)    | 0.70    | -0.00 (-0.01, -0.00) | 2.9E-03 | 0.98                    | NA                      |
|       | Direct Bilirubin                                   | 273,743        | 0.00 (0.00, 0.00)    | 1.2E-06  | 0.00 (0.00, 0.00)    | 1.7E-04 | 0.00 (-0.00, 0.01)   | 0.03    | 0.00 (-0.01, 0.02)     | 0.70    | 0.00 (0.00, 0.00)    | 2.2E-03 | 0.70                    | NA                      |
|       | Total Bilirubin                                    | 320,401        | -0.00 (-0.01, 0.00)  | 0.13     | -0.00 (-0.01, 0.00)  | 0.21    | -0.00 (-0.02, 0.01)  | 0.32    | -0.00 (-0.07, 0.07)    | 1.00    | -0.00 (-0.01, 0.00)  | 0.07    | 0.81                    | NA                      |
|       | Gamma Glutamyltransferase                          | 321,588        | 0.01 (-0.04, 0.07)   | 0.60     | 0.01 (-0.05, 0.08)   | 0.69    | 0.01 (-0.11, 0.14)   | 0.76    | -0.10 (-0.79, 0.58)    | 0.55    | 0.01 (-0.04, 0.07)   | 0.45    | 0.49                    | NA                      |
|       | Alanine aminotransferase                           | 321,623        | 0.01 (-0.01, 0.03)   | 0.33     | 0.01 (-0.01, 0.03)   | 0.34    | 0.01 (-0.03, 0.05)   | 0.49    | 0.00 (-0.22, 0.23)     | 0.99    | 0.01 (0.00, 0.01)    | 5.3E-03 | 0.88                    | NA                      |
|       | Aspartate aminotransferase                         | 320,556        | -0.02 (-0.04, -0.01) | 4.5E-04  | -0.02 (-0.04, -0.01) | 8.1E-03 | -0.02 (-0.05, 0.02)  | 0.15    | 0.02 (-0.16, 0.19)     | 0.67    | -0.02 (-0.04, -0.01) | 2.0E-03 | 0.34                    | NA                      |
|       | Augmentation index for PWA                         | 20,387         | -0.02 (-0.07, 0.02)  | 0.27     | -0.02 (-0.07, 0.03)  | 0.41    | -0.01 (-0.11, 0.09)  | 0.78    | 0.06 (-0.50, 0.61)     | 0.69    | -0.02 (-0.07, 0.02)  | 0.11    | 0.56                    | NA                      |
|       | Central augmentation pressure during PWA           | 20,169         | 0.02 (-0.02, 0.06)   | 0.27     | 0.02 (-0.03, 0.06)   | 0.50    | 0.02 (-0.07, 0.10)   | 0.52    | -0.04 (-0.51, 0.43)    | 0.72    | 0.02 (-0.03, 0.07)   | 0.21    | 0.59                    | NA                      |
|       | Mean carotid IMT (intima-medial thickness) at 240° | 17,863         | -0.54 (-1.26, 0.18)  | 0.14     | -0.61 (-1.48, 0.25)  | 0.16    | -0.64 (-2.45, 1.18)  | 0.31    | -1.43 (-10.67, 7.81)   | 0.54    | -0.54 (-1.16, 0.09)  | 0.04    | 0.69                    | NA                      |
|       | Cardiac output (L/min)                             | 3,350          | -0.01 (-0.02, 0.00)  | 0.05     | -0.01 (-0.02, 0.01)  | 0.34    | -0.01 (-0.03, 0.02)  | 0.46    | 0.04 (-0.11, 0.19)     | 0.32    | -0.01 (-0.03, 0.00)  | 0.06    | 0.21                    | NA                      |
|       | LV end systolic volume (mL)                        | 3,358          | 0.15 (-0.06, 0.36)   | 0.16     | 0.12 (-0.14, 0.37)   | 0.36    | 0.12 (-0.37, 0.61)   | 0.47    | -0.33 (-3.01, 2.35)    | 0.62    | 0.15 (-0.14, 0.44)   | 0.15    | 0.47                    | NA                      |
|       | LV end diastolic volume (mL)                       | 3,362          | 0.10 (-0.25, 0.45)   | 0.58     | 0.14 (-0.30, 0.57)   | 0.53    | 0.14 (-0.66, 0.93)   | 0.61    | -0.04 (-4.51, 4.43)    | 0.97    | 0.10 (-0.29, 0.49)   | 0.45    | 0.90                    | NA                      |
|       | LV ejection fraction (%)                           | 3,331          | -0.06 (-0.14, 0.01)  | 0.10     | -0.03 (-0.12, 0.05)  | 0.44    | -0.03 (-0.18, 0.12)  | 0.56    | 0.22 (-0.66, 1.11)     | 0.34    | -0.06 (-0.18, 0.06)  | 0.16    | 0.23                    | NA                      |
|       | Total brain volume                                 | 27,117         | 0.31 (-0.02, 0.65)   | 0.07     | 0.15 (-0.19, 0.49)   | 0.38    | 0.11 (-0.45, 0.66)   | 0.57    | -0.90 (-4.94, 3.13)    | 0.39    | 0.31 (-0.24, 0.86)   | 0.13    | 0.26                    | NA                      |
|       | Grey matter volume                                 | 27,117         | 0.14 (-0.01, 0.30)   | 0.07     | 0.11 (-0.09, 0.31)   | 0.26    | 0.08 (-0.31, 0.47)   | 0.56    | 0.09 (-2.09, 2.28)     | 0.86    | 0.14 (-0.10, 0.39)   | 0.12    | 0.92                    | NA                      |
|       | White matter volume                                | 27,117         | 0.17 (-0.05, 0.39)   | 0.13     | 0.01 (-0.21, 0.23)   | 0.93    | 0.04 (-0.34, 0.41)   | 0.77    | -1.00 (-3.16, 1.17)    | 0.12    | 0.17 (-0.19, 0.53)   | 0.19    | 0.08                    | NA                      |
|       | Hippocampal volume                                 | 27,106         | 0.01 (0.00, 0.01)    | 6.1E-03  | 0.00 (-0.00, 0.01)   | 0.13    | 0.00 (-0.01, 0.01)   | 0.29    | -0.00 (-0.06, 0.05)    | 0.92    | 0.01 (0.00, 0.01)    | 0.02    | 0.59                    | NA                      |
|       | White matter hyperintensity volume                 | 26,783         | 0.02 (-0.02, 0.05)   | 0.30     | 0.02 (-0.02, 0.06)   | 0.34    | 0.02 (-0.06, 0.10)   | 0.42    | -0.02 (-0.47, 0.43)    | 0.89    | 0.02 (-0.03, 0.06)   | 0.24    | 0.76                    | NA                      |
|       | Body mass index (BMI)                              | 336,381        | 0.04 (0.03, 0.06)    | 1.3E-10  | 0.04 (0.03, 0.05)    | 3.5E-19 | 0.04 (0.02, 0.06)    | 6.3E-04 | 0.01 (-0.17, 0.18)     | 0.90    | 0.04 (0.02, 0.07)    | 1.3E-03 | 0.38                    | NA                      |
|       | Body fat percentage (%)                            | 331,383        | 0.05 (0.03, 0.07)    | 2.0E-07  | 0.05 (0.03, 0.06)    | 1.4E-13 | 0.05 (0.02, 0.07)    | 1.0E-03 | -0.01 (-0.24, 0.23)    | 0.92    | 0.05 (0.02, 0.08)    | 3.5E-03 | 0.37                    | NA                      |
|       | Forced expiratory volume (FEV1)                    | 255,647        | -0.32 (-1.24, 0.60)  | 0.50     | -0.23 (-1.18, 0.72)  | 0.64    | -0.24 (-2.18, 1.71)  | 0.71    | -2.40 (-14.77, 9.98)   | 0.45    | -0.32 (-1.81, 1.18)  | 0.53    | 0.50                    | NA                      |
|       | Forced vital capacity (FVC)                        | 255,647        | -0.74 (-1.91, 0.43)  | 0.22     | -0.46 (-1.68, 0.76)  | 0.46    | -0.29 (-2.66, 2.08)  | 0.71    | -1.62 (-18.31, 15.08)  | 0.70    | -0.74 (-2.65, 1.17)  | 0.27    | 0.83                    | NA                      |
|       | FEV1/FVC ratio                                     | 255,647        | 0.00 (-0.00, 0.00)   | 0.14     | 0.00 (-0.00, 0.00)   | 0.27    | 0.00 (-0.00, 0.00)   | 0.57    | -0.00 (-0.00, 0.00)    | 0.36    | 0.00 (-0.00, 0.00)   | 0.10    | 0.26                    | NA                      |
|       | Systolic blood pressure                            | 307,868        | 0.02 (-0.01, 0.05)   | 0.11     | 0.03 (-0.00, 0.06)   | 0.06    | 0.03 (-0.03, 0.09)   | 0.21    | -0.13 (-0.42, 0.17)    | 0.14    | 0.02 (-0.02, 0.07)   | 0.17    | 0.09                    | NA                      |
|       | Diastolic blood pressure                           | 307,876        | -0.00 (-0.02, 0.01)  | 0.77     | -0.01 (-0.03, 0.01)  | 0.31    | -0.01 (-0.04, 0.02)  | 0.32    | -0.06 (-0.26, 0.14)    | 0.26    | -0.00 (-0.03, 0.02)  | 0.78    | 0.27                    | NA                      |

**Supplementary Table 13:** MR analyses using MR IVW, weighted medium, weighted mode, MR-Egger and MR-PRESSO approaches, for all 52 serum, urine, cardiac imaging, brain imaging and clinical biomarkers, using the NPC1L1 genetic instrument.

| GRS    | Biomarker                                          | Sample size, n | MR IVW               |         | Weighted median      |         | Weighted mode         |         | MR-Egger                 |      | MR-PRESSO            |         | P <sub>pleiotropy</sub> | P <sub>distortion</sub> |
|--------|----------------------------------------------------|----------------|----------------------|---------|----------------------|---------|-----------------------|---------|--------------------------|------|----------------------|---------|-------------------------|-------------------------|
|        |                                                    |                | beta (95% CI)        | P       | beta (95% CI)        | P       | beta (95% CI)         | P       | beta (95% CI)            | P    | beta (95% CI)        | P       |                         |                         |
| NPC1L1 | Cholesterol                                        | 321,748        | -0.02 (-0.02, -0.02) | 4.2E-27 | -0.02 (-0.03, -0.01) | 9.2E-14 | -0.02 (-0.03, -0.01)  | 7.8E-03 | -0.03 (-0.09, 0.04)      | 0.25 | -0.02 (-0.02, -0.02) | 2.9E-04 | 0.74                    | NA                      |
|        | Direct Low-Density Lipoprotein                     | 321,141        | -0.02 (-0.02, -0.01) | 2.8E-36 | -0.02 (-0.02, -0.01) | 1.3E-16 | -0.02 (-0.03, -0.01)  | 5.2E-03 | -0.02 (-0.08, 0.03)      | 0.25 | -0.02 (-0.02, -0.01) | 6.9E-04 | 0.84                    | NA                      |
|        | HDL-Cholesterol                                    | 294,531        | 0.00 (0.00, 0.00)    | 2.3E-03 | 0.00 (0.00, 0.00)    | 3.1E-04 | 0.00 (-0.00, 0.01)    | 0.07    | -0.00 (-0.03, 0.02)      | 0.72 | 0.00 (-0.00, 0.00)   | 0.05    | 0.53                    | NA                      |
|        | Triglyceride                                       | 321,484        | -0.00 (-0.01, 0.00)  | 0.05    | -0.00 (-0.01, 0.00)  | 0.08    | -0.00 (-0.01, 0.00)   | 0.18    | 0.03 (-0.03, 0.09)       | 0.18 | -0.00 (-0.01, 0.00)  | 0.15    | 0.15                    | NA                      |
|        | Apolipoprotein A                                   | 292,911        | 0.00 (0.00, 0.00)    | 2.1E-04 | 0.00 (0.00, 0.00)    | 8.7E-04 | 0.00 (-0.00, 0.00)    | 0.05    | 0.00 (-0.01, 0.02)       | 0.78 | 0.00 (0.00, 0.00)    | 0.01    | 0.93                    | NA                      |
|        | Apolipoprotein B                                   | 320,189        | -0.00 (-0.00, -0.00) | 1.9E-26 | -0.00 (-0.01, -0.00) | 4.7E-14 | -0.00 (-0.01, -0.00)  | 8.1E-03 | -0.00 (-0.02, 0.01)      | 0.30 | -0.00 (-0.00, -0.00) | 6.0E-04 | 0.85                    | NA                      |
|        | C-reactive Protein                                 | 321,051        | 0.01 (-0.02, 0.04)   | 0.42    | 0.00 (-0.01, 0.02)   | 0.63    | -0.00 (-0.03, 0.03)   | 0.82    | 0.05 (-0.67, 0.77)       | 0.80 | 0.01 (-0.04, 0.06)   | 0.48    | 0.85                    | NA                      |
|        | Lipoprotein (a)                                    | 255,820        | -0.00 (-0.17, 0.17)  | 0.98    | 0.03 (-0.18, 0.24)   | 0.78    | 0.02 (-0.35, 0.39)    | 0.85    | 1.00 (-2.41, 4.41)       | 0.34 | -0.00 (-0.24, 0.23)  | 0.98    | 0.33                    | NA                      |
|        | Vitamin D                                          | 307,609        | -0.01 (-0.10, 0.08)  | 0.81    | -0.05 (-0.13, 0.03)  | 0.24    | 0.06 (-0.09, 0.22)    | 0.27    | 0.04 (-2.04, 2.12)       | 0.94 | -0.01 (-0.15, 0.13)  | 0.82    | 0.93                    | NA                      |
|        | Rheumatoid factor                                  | 28,705         | -0.01 (-0.21, 0.20)  | 0.93    | 0.04 (-0.20, 0.27)   | 0.76    | 0.05 (-0.38, 0.48)    | 0.72    | 0.17 (-3.89, 4.24)       | 0.87 | -0.01 (-0.28, 0.26)  | 0.92    | 0.86                    | NA                      |
|        | Alkaline Phosphatase                               | 321,762        | -0.09 (-0.23, 0.04)  | 0.17    | -0.07 (-0.19, 0.05)  | 0.23    | -0.20 (-0.40, -0.01)  | 0.05    | 0.06 (-3.10, 3.23)       | 0.94 | -0.09 (-0.31, 0.12)  | 0.26    | 0.85                    | NA                      |
|        | Calcium                                            | 294,549        | -0.00 (-0.00, 0.00)  | 0.53    | -0.00 (-0.00, 0.00)  | 0.81    | -0.00 (-0.00, 0.00)   | 0.07    | -0.00 (-0.01, 0.01)      | 0.98 | -0.00 (-0.00, 0.00)  | 0.57    | 0.98                    | NA                      |
|        | SHBG                                               | 291,824        | -0.08 (-0.24, 0.08)  | 0.34    | -0.11 (-0.22, -0.01) | 0.03    | -0.10 (-0.28, 0.08)   | 0.17    | -1.20 (-2.96, 0.57)      | 0.10 | -0.08 (-0.34, 0.18)  | 0.41    | 0.11                    | NA                      |
|        | Testosterone                                       | 291,707        | -0.01 (-0.02, 0.01)  | 0.34    | -0.01 (-0.02, 0.00)  | 0.15    | -0.01 (-0.03, 0.01)   | 0.25    | -0.11 (-0.28, 0.06)      | 0.11 | -0.01 (-0.03, 0.02)  | 0.41    | 0.12                    | NA                      |
|        | Oestradiol                                         | 50,478         | -0.65 (-4.41, 3.12)  | 0.74    | 0.27 (-3.64, 4.18)   | 0.89    | 1.03 (-5.66, 7.72)    | 0.66    | 20.60 (-43.42, 84.62)    | 0.30 | -0.65 (-6.77, 5.47)  | 0.76    | 0.29                    | NA                      |
|        | IGF-1                                              | 320,022        | 0.01 (-0.03, 0.05)   | 0.58    | 0.01 (-0.01, 0.04)   | 0.42    | 0.04 (-0.00, 0.08)    | 0.06    | 0.10 (-0.77, 0.98)       | 0.67 | 0.01 (-0.05, 0.07)   | 0.62    | 0.70                    | NA                      |
|        | Glycated Haemoglobin (HbA1c)                       | 321,610        | 0.05 (0.03, 0.08)    | 2.5E-05 | 0.04 (0.02, 0.07)    | 5.4E-04 | 0.04 (-0.00, 0.08)    | 0.06    | 0.18 (-0.29, 0.65)       | 0.25 | 0.05 (0.01, 0.09)    | 0.02    | 0.37                    | NA                      |
|        | Glucose                                            | 294,346        | 0.00 (-0.00, 0.01)   | 0.57    | 0.00 (-0.00, 0.01)   | 0.83    | -0.00 (-0.01, 0.01)   | 0.76    | 0.04 (-0.04, 0.12)       | 0.16 | 0.00 (-0.01, 0.01)   | 0.61    | 0.17                    | NA                      |
|        | Cystatin C                                         | 321,727        | -0.00 (-0.00, 0.00)  | 0.57    | 0.00 (-0.00, 0.00)   | 0.99    | 0.00 (-0.00, 0.00)    | 0.78    | 0.00 (-0.01, 0.01)       | 0.93 | -0.00 (-0.00, 0.00)  | 0.53    | 0.88                    | NA                      |
|        | Creatinine                                         | 321,583        | 0.00 (-0.00, 0.00)   | 0.73    | 0.00 (-0.00, 0.00)   | 0.33    | 0.00 (-0.00, 0.00)    | 0.18    | -0.00 (-0.00, 0.00)      | 0.73 | 0.00 (-0.00, 0.00)   | 0.75    | 0.71                    | NA                      |
|        | Total protein                                      | 294,331        | -0.00 (-0.02, 0.02)  | 0.97    | 0.00 (-0.02, 0.02)   | 0.92    | -0.02 (-0.05, 0.01)   | 0.16    | -0.02 (-0.52, 0.48)      | 0.87 | -0.00 (-0.03, 0.03)  | 0.97    | 0.87                    | NA                      |
|        | Urea                                               | 321,537        | 0.00 (-0.00, 0.01)   | 0.09    | 0.00 (-0.00, 0.01)   | 0.10    | 0.00 (-0.00, 0.01)    | 0.18    | 0.01 (-0.07, 0.09)       | 0.59 | 0.00 (-0.00, 0.01)   | 0.08    | 0.70                    | NA                      |
|        | Phosphate                                          | 294,096        | -0.00 (-0.00, 0.00)  | 0.50    | -0.00 (-0.00, 0.00)  | 0.72    | 0.00 (-0.00, 0.00)    | 0.74    | 0.00 (-0.01, 0.01)       | 0.65 | -0.00 (-0.00, 0.00)  | 0.52    | 0.61                    | NA                      |
|        | Urate                                              | 321,334        | 0.28 (0.07, 0.49)    | 0.01    | 0.28 (0.03, 0.53)    | 0.03    | 0.32 (-0.16, 0.79)    | 0.13    | 0.52 (-3.67, 4.71)       | 0.65 | 0.28 (0.05, 0.51)    | 0.03    | 0.83                    | NA                      |
|        | Creatinine (urine)                                 | 327,791        | 17.07 (0.37, 33.76)  | 0.05    | 20.24 (0.59, 39.89)  | 0.04    | 20.81 (-17.38, 59.01) | 0.18    | -44.09 (-373.59, 285.41) | 0.62 | 17.07 (-0.93, 35.06) | 0.06    | 0.51                    | NA                      |
|        | Sodium (urine)                                     | 327,096        | -0.05 (-0.18, 0.08)  | 0.45    | -0.08 (-0.23, 0.07)  | 0.31    | -0.08 (-0.38, 0.22)   | 0.45    | -0.72 (-3.26, 1.82)      | 0.35 | -0.05 (-0.21, 0.11)  | 0.41    | 0.37                    | NA                      |
|        | Potassium (urine)                                  | 327,082        | 0.06 (-0.04, 0.17)   | 0.24    | 0.07 (-0.05, 0.18)   | 0.26    | 0.07 (-0.15, 0.30)    | 0.38    | -0.26 (-2.30, 1.78)      | 0.63 | 0.06 (-0.03, 0.15)   | 0.11    | 0.56                    | NA                      |
|        | Albumin                                            | 294,657        | -0.01 (-0.02, 0.01)  | 0.37    | -0.00 (-0.02, 0.01)  | 0.52    | -0.02 (-0.03, 0.00)   | 0.08    | -0.01 (-0.31, 0.29)      | 0.88 | -0.01 (-0.03, 0.01)  | 0.44    | 0.94                    | NA                      |
|        | Direct Bilirubin                                   | 273,743        | 0.00 (-0.00, 0.00)   | 0.99    | -0.00 (-0.00, 0.00)  | 0.61    | -0.00 (-0.01, 0.01)   | 0.66    | 0.01 (-0.04, 0.07)       | 0.43 | 0.00 (-0.00, 0.00)   | 0.99    | 0.43                    | NA                      |
|        | Total Bilirubin                                    | 320,401        | -0.01 (-0.02, 0.01)  | 0.24    | -0.01 (-0.02, 0.01)  | 0.50    | -0.01 (-0.03, 0.02)   | 0.61    | 0.01 (-0.25, 0.28)       | 0.84 | -0.01 (-0.02, 0.00)  | 0.14    | 0.75                    | NA                      |
|        | Gamma Glutamyltransferase                          | 321,588        | -0.06 (-0.21, 0.09)  | 0.44    | -0.02 (-0.17, 0.13)  | 0.79    | -0.04 (-0.31, 0.23)   | 0.68    | 1.01 (-1.51, 3.53)       | 0.23 | -0.06 (-0.30, 0.18)  | 0.49    | 0.21                    | NA                      |
|        | Alanine aminotransferase                           | 321,623        | -0.05 (-0.14, 0.05)  | 0.32    | -0.04 (-0.10, 0.03)  | 0.24    | -0.09 (-0.21, 0.03)   | 0.10    | 0.50 (-0.91, 1.92)       | 0.27 | -0.05 (-0.19, 0.10)  | 0.40    | 0.23                    | NA                      |
|        | Aspartate aminotransferase                         | 320,556        | -0.00 (-0.06, 0.06)  | 0.99    | -0.03 (-0.07, 0.02)  | 0.25    | -0.04 (-0.10, 0.03)   | 0.17    | 0.19 (-1.25, 1.64)       | 0.62 | -0.00 (-0.11, 0.10)  | 0.99    | 0.62                    | NA                      |
|        | Augmentation index for PWA                         | 20,387         | 0.01 (-0.11, 0.12)   | 0.88    | 0.06 (-0.07, 0.18)   | 0.38    | 0.07 (-0.15, 0.28)    | 0.40    | -0.24 (-2.87, 2.39)      | 0.73 | 0.01 (-0.18, 0.19)   | 0.89    | 0.72                    | NA                      |
|        | Central augmentation pressure during PWA           | 20,169         | -0.04 (-0.13, 0.05)  | 0.38    | -0.01 (-0.11, 0.10)  | 0.91    | -0.00 (-0.19, 0.18)   | 0.97    | -0.25 (-1.97, 1.47)      | 0.60 | -0.04 (-0.15, 0.07)  | 0.33    | 0.65                    | NA                      |
|        | Mean carotid IMT (intima-medial thickness) at 240° | 17,863         | 0.35 (-1.39, 2.08)   | 0.69    | 0.50 (-1.42, 2.42)   | 0.61    | 0.63 (-3.12, 4.38)    | 0.63    | 3.28 (-31.01, 37.57)     | 0.72 | 0.35 (-0.64, 1.33)   | 0.35    | 0.75                    | NA                      |
|        | Cardiac output (L/min)                             | 3,350          | 0.00 (-0.04, 0.04)   | 0.86    | 0.01 (-0.03, 0.04)   | 0.73    | -0.03 (-0.09, 0.04)   | 0.25    | -0.03 (-1.02, 0.96)      | 0.91 | 0.00 (-0.06, 0.07)   | 0.87    | 0.90                    | NA                      |
|        | LV end systolic volume (mL)                        | 3,358          | -0.64 (-1.15, -0.12) | 0.01    | -0.57 (-1.15, 0.02)  | 0.06    | -0.47 (-1.56, 0.63)   | 0.27    | -2.68 (-12.84, 7.48)     | 0.37 | -0.64 (-1.38, 0.11)  | 0.07    | 0.48                    | NA                      |
|        | LV end diastolic volume (mL)                       | 3,362          | -0.69 (-1.55, 0.16)  | 0.11    | -0.84 (-1.82, 0.14)  | 0.09    | -0.84 (-2.72, 1.04)   | 0.25    | -4.06 (-21.01, 12.90)    | 0.41 | -0.69 (-1.47, 0.09)  | 0.07    | 0.48                    | NA                      |
|        | LV ejection fraction (%)                           | 3,331          | 0.13 (-0.14, 0.39)   | 0.35    | 0.04 (-0.16, 0.25)   | 0.67    | 0.01 (-0.36, 0.38)    | 0.95    | 0.60 (-5.75, 6.95)       | 0.72 | 0.13 (-0.31, 0.56)   | 0.42    | 0.78                    | NA                      |
|        | Total brain volume                                 | 27,117         | -0.14 (-0.83, 0.55)  | 0.70    | 0.01 (-0.74, 0.77)   | 0.97    | 0.19 (-1.15, 1.53)    | 0.68    | -1.21 (-17.51, 15.08)    | 0.78 | -0.14 (-1.26, 0.98)  | 0.72    | 0.80                    | NA                      |
|        | Grey matter volume                                 | 27,117         | 0.05 (-0.33, 0.42)   | 0.82    | 0.15 (-0.30, 0.59)   | 0.52    | 0.24 (-0.56, 1.03)    | 0.41    | -0.94 (-8.41, 6.53)      | 0.64 | 0.05 (-0.45, 0.54)   | 0.79    | 0.63                    | NA                      |
|        | White matter volume                                | 27,117         | -0.18 (-0.59, 0.23)  | 0.38    | -0.13 (-0.63, 0.36)  | 0.60    | 0.01 (-0.84, 0.86)    | 0.98    | -0.28 (-10.14, 9.59)     | 0.91 | -0.18 (-0.85, 0.48)  | 0.45    | 0.97                    | NA                      |
|        | Hippocampal volume                                 | 27,106         | 0.00 (-0.01, 0.01)   | 0.77    | 0.00 (-0.01, 0.01)   | 0.78    | 0.01 (-0.01, 0.03)    | 0.34    | 0.02 (-0.19, 0.23)       | 0.73 | 0.00 (-0.01, 0.02)   | 0.76    | 0.75                    | NA                      |
|        | White matter hyperintensity volume                 | 26,783         | -0.03 (-0.13, 0.07)  | 0.54    | -0.00 (-0.10, 0.10)  | 0.98    | 0.00 (-0.18, 0.19)    | 0.95    | 0.69 (-0.97, 2.34)       | 0.22 | -0.03 (-0.19, 0.13)  | 0.58    | 0.20                    | NA                      |
|        | Body mass index (BMI)                              | 336,381        | -0.01 (-0.05, 0.03)  | 0.68    | -0.01 (-0.03, 0.01)  | 0.26    | -0.02 (-0.05, 0.02)   | 0.23    | 0.18 (-0.60, 0.95)       | 0.43 | -0.01 (-0.07, 0.06)  | 0.71    | 0.41                    | NA                      |
|        | Body fat percentage (%)                            | 331,383        | -0.01 (-0.06, 0.04)  | 0.59    | -0.02 (-0.05, 0.01)  | 0.18    | -0.03 (-0.08, 0.02)   | 0.15    | 0.21 (-0.80, 1.22)       | 0.46 | -0.01 (-0.10, 0.07)  | 0.63    | 0.44                    | NA                      |
|        | Forced expiratory volume (FEV1)                    | 255,647        | -1.17 (-4.22, 1.88)  | 0.45    | -0.09 (-2.38, 2.20)  | 0.94    | -0.08 (-3.93, 3.78)   | 0.95    | 18.56 (-23.75, 60.87)    | 0.20 | -1.17 (-6.13, 3.79)  | 0.51    | 0.18                    | NA                      |
|        | Forced vital capacity (FVC)                        | 255,647        | -0.93 (-3.88, 2.02)  | 0.54    | 0.06 (-2.73, 2.84)   | 0.97    | 0.08 (-4.86, 5.03)    | 0.96    | 19.09 (-27.65, 65.83)    | 0.22 | -0.93 (-5.72, 3.86)  | 0.58    | 0.20                    | NA                      |
|        | FEV1/FVC ratio                                     | 255,647        | -0.00 (-0.00, 0.00)  | 0.67    | 0.00 (-0.00, 0.00)   | 0.93    | 0.00 (-0.00, 0.00)    | 0.92    | 0.00 (-0.00, 0.01)       | 0.27 | -0.00 (-0.00, 0.00)  | 0.70    | 0.25                    | NA                      |
|        | Systolic blood pressure                            | 307,868        | -0.05 (-0.11, -0.00) | 0.06    | -0.04 (-0.11, 0.02)  | 0.21    | -0.04 (-0.16, 0.08)   | 0.34    | 0.18 (-0.90, 1.27)       | 0.54 | -0.05 (-0.11, 0.00)  | 0.06    | 0.44                    | NA                      |
|        | Diastolic blood pressure                           | 307,876        | 0.03 (-0.02, 0.09)   | 0.25    | 0.02 (-0.02, 0.08)   | 0.23    | 0.07 (-0.02, 0.15)    | 0.09    | -0.28 (-1.33, 0.77)      | 0.37 | -0.03 (-0.77, 1.33)  | 0.33    | 0.32                    | NA                      |

**Supplementary Table 14:** MR analyses using MR IVW, weighted medium, weighted mode, MR-Egger and MR-PRESSO approaches, for all 52 serum, urine, cardiac imaging, brain imaging and clinical biomarkers, using the LDLR genetic instrument.

| GRS  | Biomarker                                          | Sample size, n | MR IVW               |         | Weighted median      |          | Weighted mode        |         | MR-Egger              |      | MR-PRESSO     |    | P <sub>pleiotropy</sub> | P <sub>distortion</sub> |
|------|----------------------------------------------------|----------------|----------------------|---------|----------------------|----------|----------------------|---------|-----------------------|------|---------------|----|-------------------------|-------------------------|
|      |                                                    |                | beta (95% CI)        | P       | beta (95% CI)        | P        | beta (95% CI)        | P       | beta (95% CI)         | P    | beta (95% CI) | P  |                         |                         |
| LDLR | Cholesterol                                        | 321,748        | -0.03 (-0.03, -0.02) | 6.1E-38 | -0.03 (-0.03, -0.03) | 2.0E-246 | -0.03 (-0.03, -0.02) | 8.2E-04 | -0.03 (-0.04, -0.02)  | 0.07 | NA            | NA | 0.42                    | NA                      |
|      | Direct Low-Density Lipoprotein                     | 321,141        | -0.02 (-0.02, -0.02) | 4.4E-58 | -0.02 (-0.02, -0.02) | 1.2E-289 | -0.02 (-0.02, -0.02) | 6.9E-04 | -0.02 (-0.03, -0.02)  | 0.06 | NA            | NA | 0.43                    | NA                      |
|      | HDL-Cholesterol                                    | 294,531        | 0.00 (-0.00, 0.00)   | 0.57    | 0.00 (-0.00, 0.00)   | 0.52     | 0.00 (-0.00, 0.00)   | 0.97    | -0.00 (-0.00, 0.00)   | 0.37 | NA            | NA | 0.23                    | NA                      |
|      | Triglyceride                                       | 321,484        | -0.00 (-0.00, 0.00)  | 0.32    | -0.00 (-0.00, 0.00)  | 0.26     | -0.00 (-0.00, 0.00)  | 0.36    | -0.00 (-0.00, 0.00)   | 0.45 | NA            | NA | 0.60                    | NA                      |
|      | Apolipoprotein A                                   | 292,911        | 0.00 (0.00, 0.00)    | 7.2E-09 | 0.00 (0.00, 0.00)    | 1.1E-14  | 0.00 (0.00, 0.00)    | 0.03    | 0.00 (-0.00, 0.00)    | 0.20 | NA            | NA | 0.29                    | NA                      |
|      | Apolipoprotein B                                   | 320,189        | -0.01 (-0.01, -0.01) | 6.5E-67 | -0.01 (-0.01, -0.01) | 7.9E-280 | -0.01 (-0.01, -0.01) | 8.7E-04 | -0.01 (-0.01, -0.00)  | 0.06 | NA            | NA | 0.55                    | NA                      |
|      | C-reactive Protein                                 | 321,051        | -0.00 (-0.00, 0.00)  | 0.88    | -0.00 (-0.00, 0.00)  | 0.95     | 0.00 (-0.01, 0.01)   | 1.00    | -0.00 (-0.02, 0.02)   | 0.98 | NA            | NA | 0.97                    | NA                      |
|      | Lipoprotein (a)                                    | 255,820        | -0.09 (-0.14, -0.04) | 1.0E-03 | -0.10 (-0.15, -0.04) | 6.4E-04  | -0.10 (-0.20, 0.00)  | 0.09    | -0.11 (-0.32, 0.10)   | 0.26 | NA            | NA | 0.68                    | NA                      |
|      | Vitamin D                                          | 307,609        | 0.07 (0.03, 0.12)    | 1.4E-03 | 0.08 (0.06, 0.11)    | 1.4E-13  | 0.09 (0.05, 0.12)    | 0.02    | 0.11 (-0.04, 0.26)    | 0.20 | NA            | NA | 0.42                    | NA                      |
|      | Rheumatoid factor                                  | 28,705         | 0.03 (-0.03, 0.09)   | 0.36    | 0.04 (-0.02, 0.11)   | 0.21     | 0.04 (-0.07, 0.16)   | 0.35    | 0.06 (-0.19, 0.31)    | 0.51 | NA            | NA | 0.68                    | NA                      |
|      | Alkaline Phosphatase                               | 321,762        | -0.03 (-0.06, -0.00) | 0.03    | -0.02 (-0.05, 0.00)  | 0.07     | -0.02 (-0.07, 0.02)  | 0.25    | -0.01 (-0.15, 0.12)   | 0.72 | NA            | NA | 0.63                    | NA                      |
|      | Calcium                                            | 294,549        | 0.00 (-0.00, 0.00)   | 0.33    | 0.00 (-0.00, 0.00)   | 0.42     | 0.00 (-0.00, 0.00)   | 0.57    | 0.00 (-0.00, 0.00)    | 0.90 | NA            | NA | 0.72                    | NA                      |
|      | SHBG                                               | 291,824        | 0.02 (-0.01, 0.05)   | 0.13    | 0.02 (-0.01, 0.05)   | 0.21     | 0.02 (-0.03, 0.06)   | 0.37    | 0.01 (-0.09, 0.11)    | 0.70 | NA            | NA | 0.75                    | NA                      |
|      | Testosterone                                       | 291,707        | 0.00 (-0.00, 0.00)   | 0.29    | 0.00 (-0.00, 0.00)   | 0.21     | 0.00 (-0.00, 0.01)   | 0.34    | 0.00 (-0.01, 0.01)    | 0.49 | NA            | NA | 0.69                    | NA                      |
|      | Oestradiol                                         | 50,478         | 0.50 (-0.57, 1.56)   | 0.36    | 0.32 (-0.71, 1.35)   | 0.54     | 0.21 (-1.53, 1.94)   | 0.74    | -0.54 (-4.48, 3.41)   | 0.66 | NA            | NA | 0.40                    | NA                      |
|      | IGF-1                                              | 320,022        | -0.02 (-0.03, 0.00)  | 0.07    | -0.02 (-0.03, -0.01) | 1.0E-07  | -0.02 (-0.03, -0.01) | 0.04    | -0.02 (-0.11, 0.07)   | 0.53 | NA            | NA | 0.87                    | NA                      |
|      | Glycated Haemoglobin (HbA1c)                       | 321,610        | 0.00 (-0.00, 0.01)   | 0.54    | 0.00 (-0.00, 0.01)   | 0.44     | 0.00 (-0.01, 0.01)   | 0.55    | 0.00 (-0.02, 0.03)    | 0.63 | NA            | NA | 0.77                    | NA                      |
|      | Glucose                                            | 294,346        | 0.00 (-0.00, 0.00)   | 0.46    | 0.00 (-0.00, 0.00)   | 0.50     | 0.00 (-0.00, 0.00)   | 0.75    | -0.00 (-0.00, 0.00)   | 0.96 | NA            | NA | 0.67                    | NA                      |
|      | Cystatin C                                         | 321,727        | -0.00 (-0.00, 0.00)  | 0.87    | -0.00 (-0.00, 0.00)  | 0.83     | -0.00 (-0.00, 0.00)  | 0.84    | -0.00 (-0.00, 0.00)   | 0.84 | NA            | NA | 0.87                    | NA                      |
|      | Creatinine                                         | 321,583        | 0.00 (-0.00, 0.00)   | 0.07    | 0.00 (-0.00, 0.00)   | 0.11     | 0.00 (-0.00, 0.00)   | 0.32    | 0.00 (-0.00, 0.00)    | 0.69 | NA            | NA | 0.83                    | NA                      |
|      | Total protein                                      | 294,331        | -0.00 (-0.01, 0.00)  | 0.23    | -0.00 (-0.01, 0.00)  | 0.12     | -0.01 (-0.01, 0.00)  | 0.13    | -0.01 (-0.03, 0.01)   | 0.23 | NA            | NA | 0.29                    | NA                      |
|      | Urea                                               | 321,537        | 0.00 (-0.00, 0.00)   | 0.76    | -0.00 (-0.00, 0.00)  | 0.92     | -0.00 (-0.00, 0.00)  | 0.84    | -0.00 (-0.01, 0.01)   | 0.83 | NA            | NA | 0.71                    | NA                      |
|      | Phosphate                                          | 294,096        | 0.00 (-0.00, 0.00)   | 0.66    | 0.00 (-0.00, 0.00)   | 0.78     | 0.00 (-0.00, 0.00)   | 0.84    | -0.00 (-0.00, 0.00)   | 0.97 | NA            | NA | 0.79                    | NA                      |
|      | Urate                                              | 321,334        | 0.06 (-0.01, 0.12)   | 0.09    | 0.06 (-0.00, 0.13)   | 0.07     | 0.07 (-0.05, 0.19)   | 0.20    | 0.11 (-0.15, 0.37)    | 0.32 | NA            | NA | 0.48                    | NA                      |
|      | Creatinine (urine)                                 | 327,791        | 6.04 (-2.16, 14.23)  | 0.15    | 4.38 (-1.19, 9.94)   | 0.12     | 3.63 (-5.65, 12.92)  | 0.34    | -0.23 (-31.60, 31.15) | 0.98 | NA            | NA | 0.49                    | NA                      |
|      | Sodium (urine)                                     | 327,096        | 0.08 (0.03, 0.13)    | 0.00    | 0.07 (0.02, 0.11)    | 3.8E-03  | 0.06 (-0.01, 0.14)   | 0.12    | 0.05 (-0.19, 0.29)    | 0.54 | NA            | NA | 0.67                    | NA                      |
|      | Potassium (urine)                                  | 327,082        | -0.01 (-0.04, 0.02)  | 0.49    | -0.01 (-0.04, 0.02)  | 0.55     | -0.02 (-0.08, 0.04)  | 0.37    | -0.03 (-0.16, 0.09)   | 0.44 | NA            | NA | 0.51                    | NA                      |
|      | Albumin                                            | 294,657        | 0.00 (-0.00, 0.00)   | 0.10    | 0.00 (-0.00, 0.01)   | 0.09     | 0.00 (-0.00, 0.01)   | 0.27    | 0.00 (-0.01, 0.01)    | 0.46 | NA            | NA | 0.86                    | NA                      |
|      | Direct Bilirubin                                   | 273,743        | 0.00 (0.00, 0.00)    | 9.8E-09 | 0.00 (0.00, 0.00)    | 2.6E-07  | 0.00 (0.00, 0.00)    | 0.05    | 0.00 (-0.00, 0.01)    | 0.25 | NA            | NA | 0.52                    | NA                      |
|      | Total Bilirubin                                    | 320,401        | -0.00 (-0.01, 0.00)  | 0.36    | -0.00 (-0.01, 0.00)  | 0.38     | -0.00 (-0.01, 0.00)  | 0.27    | -0.01 (-0.02, 0.01)   | 0.34 | NA            | NA | 0.39                    | NA                      |
|      | Gamma Glutamyltransferase                          | 321,588        | 0.03 (-0.05, 0.12)   | 0.45    | 0.02 (-0.02, 0.06)   | 0.38     | 0.01 (-0.06, 0.08)   | 0.67    | -0.05 (-0.22, 0.12)   | 0.42 | NA            | NA | 0.24                    | NA                      |
|      | Alanine aminotransferase                           | 321,623        | 0.01 (0.00, 0.03)    | 0.04    | 0.01 (0.00, 0.03)    | 0.05     | 0.01 (-0.01, 0.04)   | 0.27    | 0.01 (-0.04, 0.06)    | 0.63 | NA            | NA | 0.67                    | NA                      |
|      | Aspartate aminotransferase                         | 320,556        | 0.01 (-0.00, 0.02)   | 0.13    | 0.01 (-0.00, 0.02)   | 0.14     | 0.01 (-0.01, 0.02)   | 0.40    | -0.00 (-0.04, 0.04)   | 0.90 | NA            | NA | 0.38                    | NA                      |
|      | Augmentation index for PWA                         | 20,387         | 0.01 (-0.02, 0.04)   | 0.56    | 0.01 (-0.03, 0.04)   | 0.62     | 0.01 (-0.05, 0.07)   | 0.69    | 0.01 (-0.12, 0.13)    | 0.86 | NA            | NA | 0.92                    | NA                      |
|      | Central augmentation pressure during PWA           | 20,169         | 0.01 (-0.02, 0.04)   | 0.46    | 0.01 (-0.02, 0.03)   | 0.73     | 0.00 (-0.04, 0.05)   | 0.80    | -0.01 (-0.11, 0.10)   | 0.81 | NA            | NA | 0.54                    | NA                      |
|      | Mean carotid IMT (intima-medial thickness) at 240° | 17,863         | -0.54 (-1.08, -0.01) | 0.05    | -0.53 (-1.08, 0.02)  | 0.06     | -0.52 (-1.52, 0.48)  | 0.24    | -0.50 (-2.60, 1.60)   | 0.49 | NA            | NA | 0.93                    | NA                      |
|      | Cardiac output (L/min)                             | 3,350          | -0.00 (-0.01, 0.01)  | 0.71    | -0.01 (-0.02, 0.00)  | 0.31     | -0.01 (-0.02, 0.01)  | 0.39    | -0.01 (-0.07, 0.05)   | 0.62 | NA            | NA | 0.65                    | NA                      |
|      | LV end systolic volume (mL)                        | 3,358          | -0.09 (-0.24, 0.07)  | 0.29    | -0.09 (-0.26, 0.07)  | 0.28     | -0.11 (-0.40, 0.19)  | 0.37    | -0.15 (-0.77, 0.48)   | 0.50 | NA            | NA | 0.71                    | NA                      |
|      | LV end diastolic volume (mL)                       | 3,362          | -0.10 (-0.36, 0.17)  | 0.48    | -0.11 (-0.38, 0.15)  | 0.41     | -0.14 (-0.63, 0.36)  | 0.47    | -0.22 (-1.26, 0.81)   | 0.52 | NA            | NA | 0.64                    | NA                      |
|      | LV ejection fraction (%)                           | 3,331          | 0.01 (-0.04, 0.06)   | 0.65    | 0.01 (-0.05, 0.06)   | 0.85     | 0.01 (-0.10, 0.11)   | 0.89    | -0.00 (-0.21, 0.20)   | 0.97 | NA            | NA | 0.78                    | NA                      |
|      | Total brain volume                                 | 27,117         | 0.10 (-0.21, 0.41)   | 0.53    | 0.03 (-0.18, 0.24)   | 0.78     | 0.01 (-0.34, 0.36)   | 0.93    | -0.12 (-1.38, 1.13)   | 0.75 | NA            | NA | 0.53                    | NA                      |
|      | Grey matter volume                                 | 27,117         | -0.03 (-0.18, 0.12)  | 0.73    | -0.04 (-0.17, 0.08)  | 0.49     | -0.07 (-0.29, 0.15)  | 0.41    | -0.16 (-0.63, 0.31)   | 0.38 | NA            | NA | 0.37                    | NA                      |
|      | White matter volume                                | 27,117         | 0.13 (-0.04, 0.29)   | 0.14    | 0.09 (-0.05, 0.23)   | 0.22     | 0.08 (-0.16, 0.32)   | 0.41    | 0.04 (-0.77, 0.84)    | 0.87 | NA            | NA | 0.67                    | NA                      |
|      | Hippocampal volume                                 | 27,106         | 0.00 (-0.00, 0.00)   | 0.39    | 0.00 (-0.00, 0.00)   | 0.56     | 0.00 (-0.01, 0.01)   | 0.70    | 0.00 (-0.01, 0.01)    | 0.85 | NA            | NA | 0.81                    | NA                      |
|      | White matter hyperintensity volume                 | 26,783         | -0.02 (-0.05, 0.00)  | 0.06    | -0.02 (-0.05, 0.01)  | 0.16     | -0.02 (-0.07, 0.03)  | 0.34    | -0.02 (-0.12, 0.09)   | 0.64 | NA            | NA | 0.71                    | NA                      |
|      | Body mass index (BMI)                              | 336,381        | 0.00 (-0.00, 0.01)   | 0.43    | 0.00 (-0.00, 0.01)   | 0.05     | 0.01 (-0.00, 0.01)   | 0.15    | 0.01 (-0.01, 0.03)    | 0.24 | NA            | NA | 0.28                    | NA                      |
|      | Body fat percentage (%)                            | 331,383        | 0.00 (-0.00, 0.01)   | 0.33    | 0.01 (-0.00, 0.01)   | 0.09     | 0.01 (-0.00, 0.02)   | 0.18    | 0.01 (-0.01, 0.04)    | 0.25 | NA            | NA | 0.30                    | NA                      |
|      | Forced expiratory volume (FEV1)                    | 255,647        | 0.95 (-0.53, 2.44)   | 0.21    | 0.58 (-0.06, 1.22)   | 0.07     | 0.52 (-0.53, 1.58)   | 0.26    | -0.04 (-6.40, 6.31)   | 0.98 | NA            | NA | 0.56                    | NA                      |
|      | Forced vital capacity (FVC)                        | 255,647        | 1.23 (-0.47, 2.92)   | 0.16    | 1.13 (0.35, 1.91)    | 4.5E-03  | 0.64 (-0.80, 2.07)   | 0.29    | -0.42 (-4.16, 3.31)   | 0.71 | NA            | NA | 0.26                    | NA                      |
|      | FEV1/FVC ratio                                     | 255,647        | -0.00 (-0.00, 0.00)  | 0.97    | 0.00 (-0.00, 0.00)   | 0.65     | 0.00 (-0.00, 0.00)   | 0.63    | 0.00 (-0.00, 0.00)    | 0.79 | NA            | NA | 0.73                    | NA                      |
|      | Systolic blood pressure                            | 307,868        | -0.02 (-0.05, 0.01)  | 0.14    | -0.02 (-0.04, 0.00)  | 0.05     | -0.02 (-0.05, 0.01)  | 0.21    | -0.02 (-0.16, 0.12)   | 0.63 | NA            | NA | 0.95                    | NA                      |
|      | Diastolic blood pressure                           | 307,876        | 0.99 (-0.00, 0.02)   | 0.12    | 0.99 (0.00, 0.02)    | 0.07     | 0.99 (-0.00, 0.03)   | 0.22    | 0.99 (-0.02, 0.05)    | 0.50 | NA            | NA | 0.77                    | NA                      |

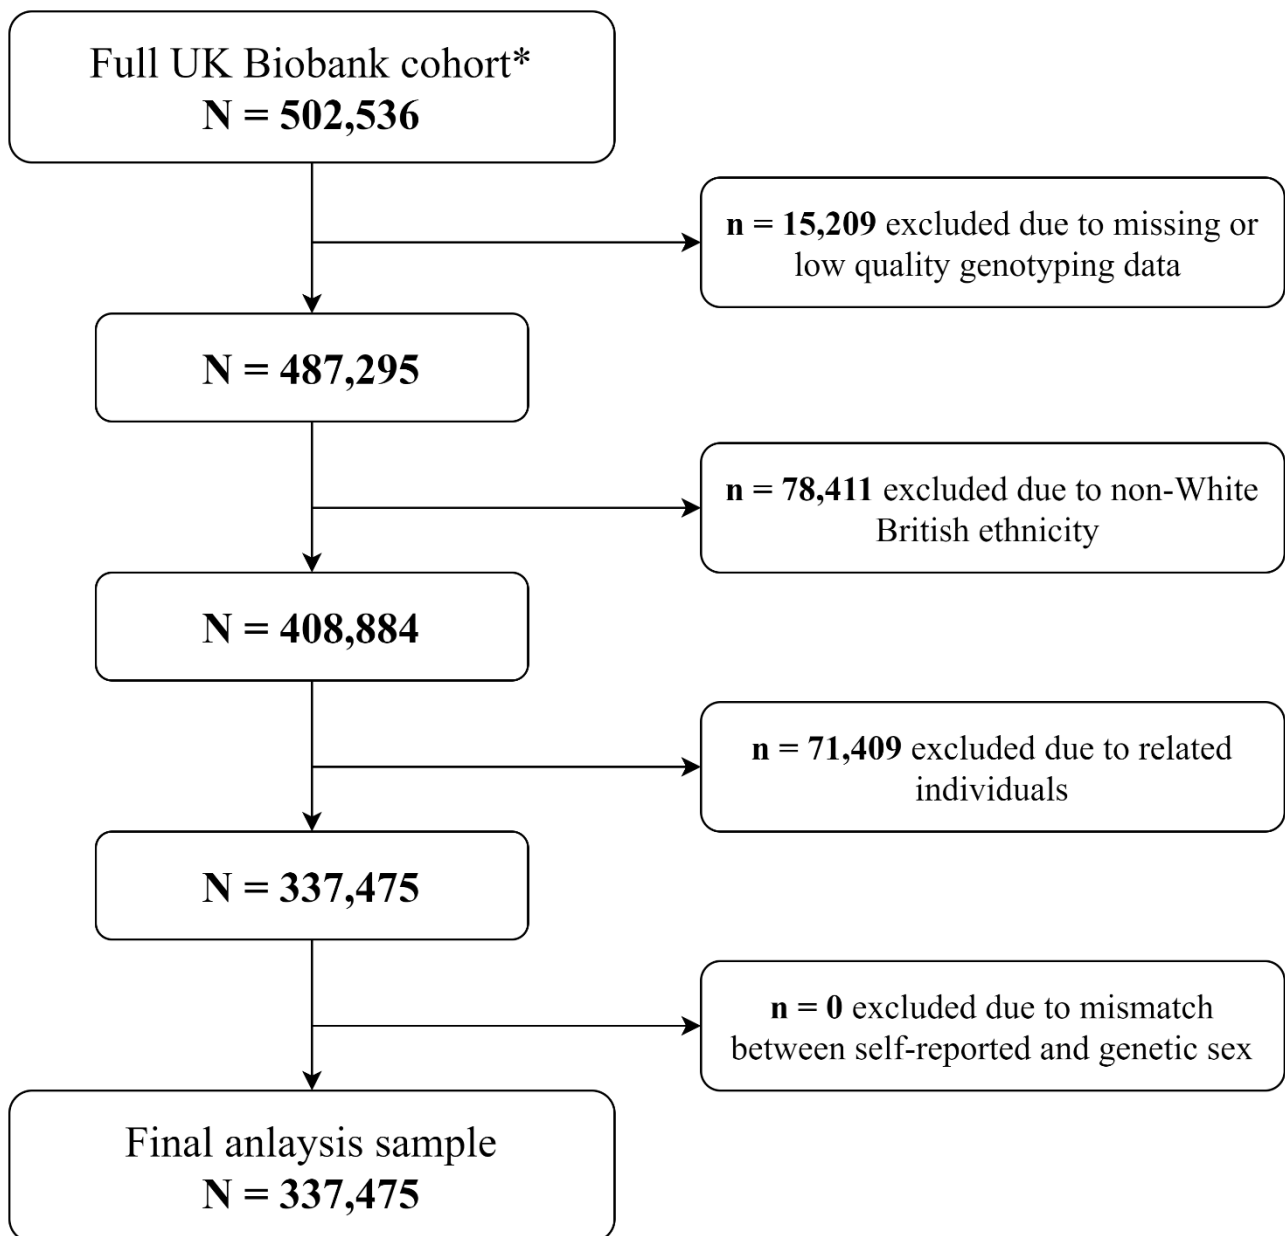

\* Excludes any participants who withdrew consent after participation in the study.

**Supplementary Figure 1:** Participant flowchart showing the sample restriction from the full UK Biobank cohort to the final analysis sample for the MR-PheWAS analysis.

**Unstable angina (411.1)**

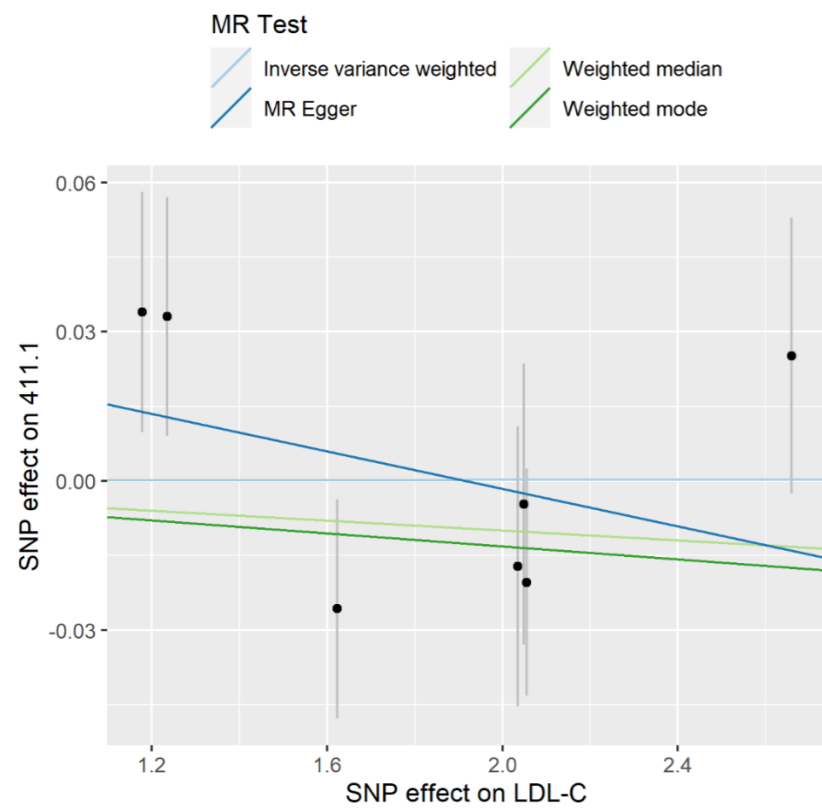

**Plot A**

**Plot A** shows the scatter plot of the variant-outcome association estimates for each genetic variant, against the overall estimates for the variant-exposure (i.e. LDL-C lowering) association using different MR methods.

**Plot B** displays the leave-one-out analysis, which compares the effect estimates when excluding each of the genetic variants in the GRS, one at a time, to the overall estimate including all variants.

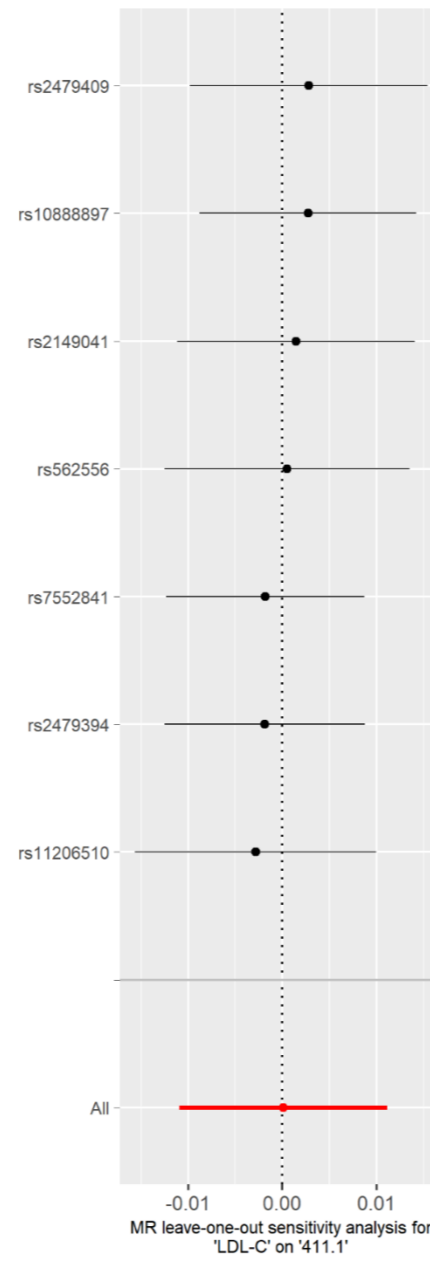

**Plot B**

**Myocardial infarction (411.2)**

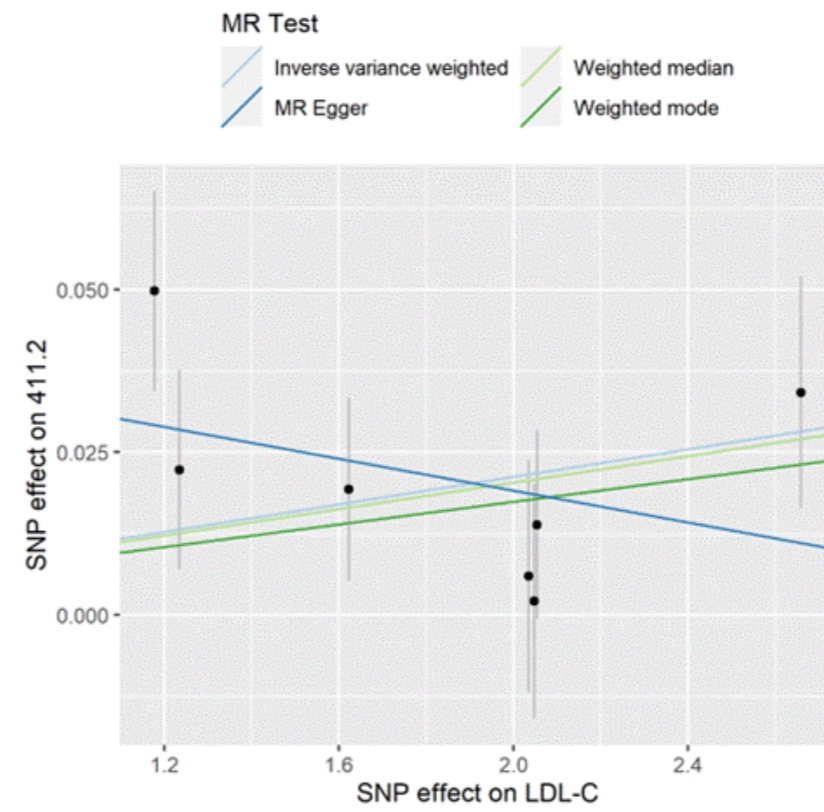

**Plot A**

**Plot A** shows the scatter plot of the variant-outcome association estimates for each genetic variant, against the overall estimates for the variant-exposure (i.e. LDL-C lowering) association using different MR methods.

**Plot B** displays the leave-one-out analysis, which compares the effect estimates when excluding each of the genetic variants in the GRS, one at a time, to the overall estimate including all variants.

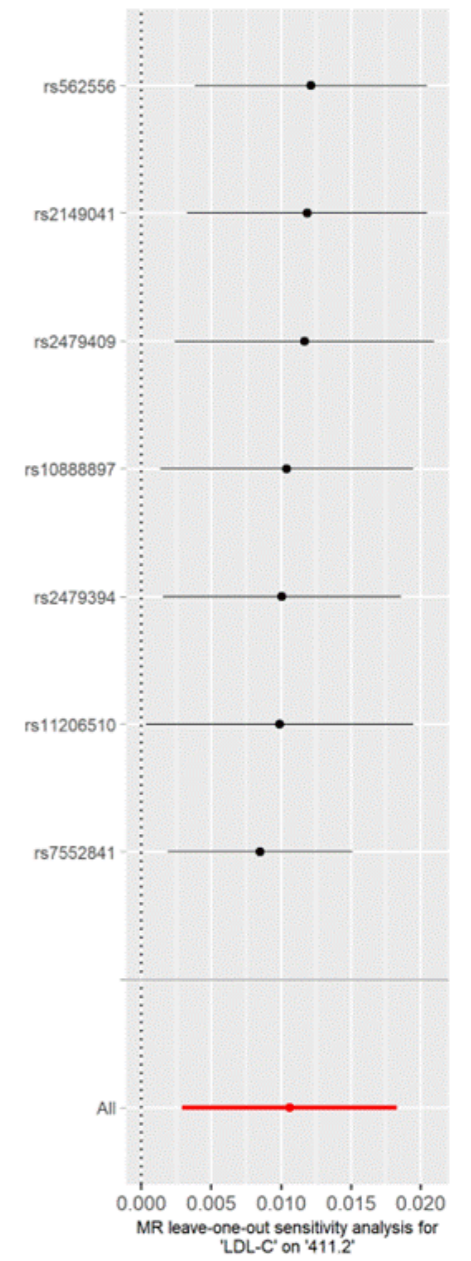

**Plot B**



**Angina pectoris (411.3)**

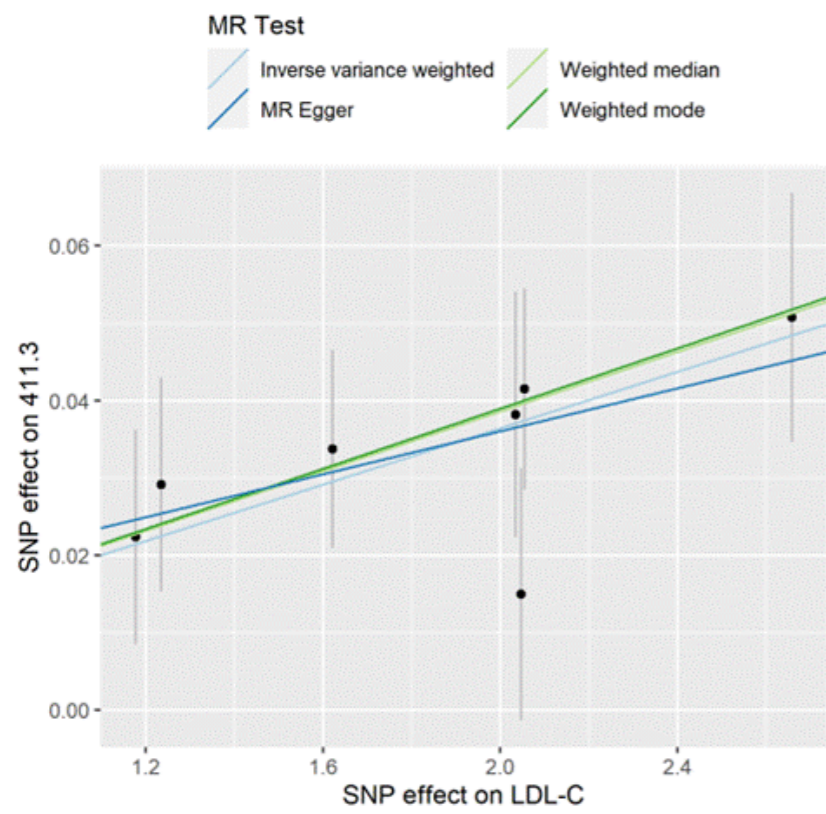

**Plot A**

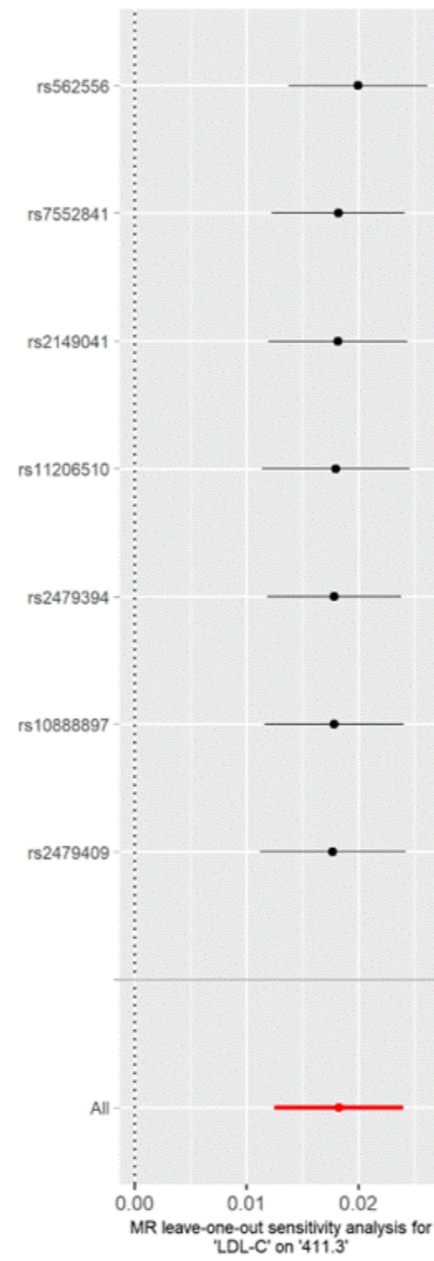

**Plot B**

**Plot A** shows the scatter plot of the variant-outcome association estimates for each genetic variant, against the overall estimates for the variant-exposure (i.e. LDL-C lowering) association using different MR methods.

**Plot B** displays the leave-one-out analysis, which compares the effect estimates when excluding each of the genetic variants in the GRS, one at a time, to the overall estimate including all variants.

**Coronary atherosclerosis (411.4)**

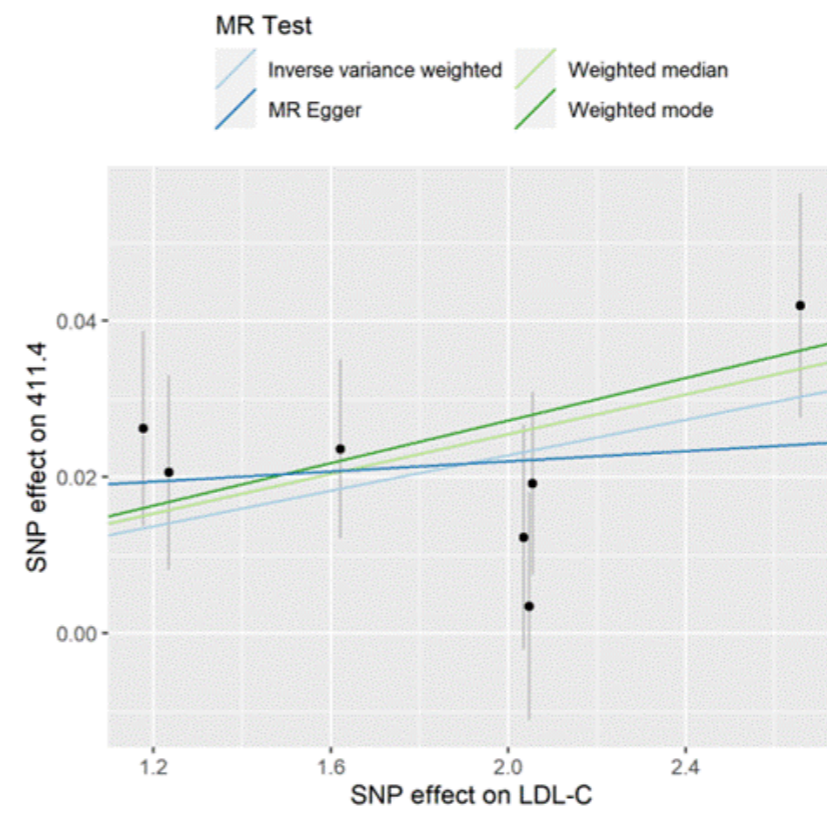

**Plot A**

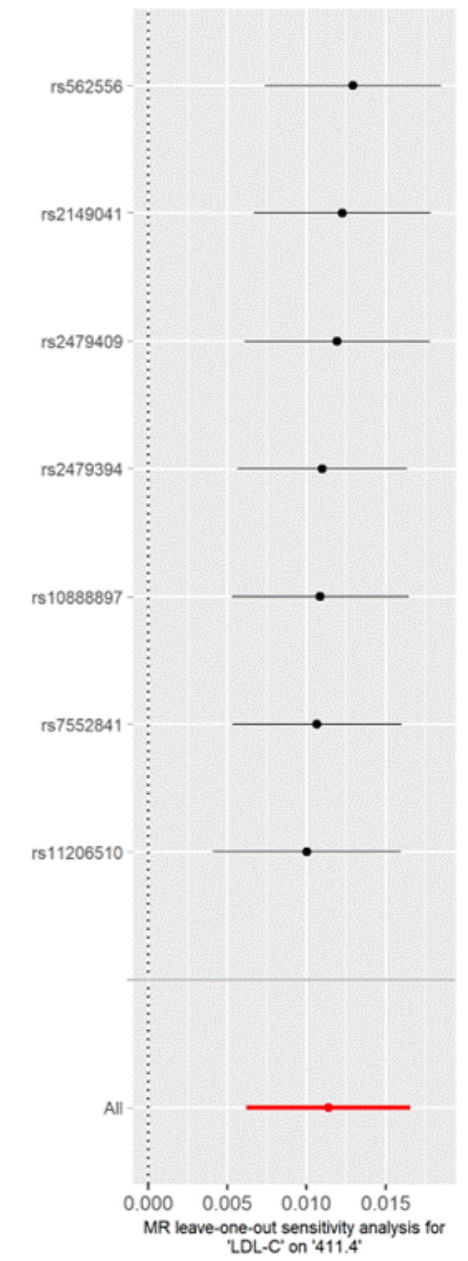

**Plot B**

**Plot A** shows the scatter plot of the variant-outcome association estimates for each genetic variant, against the overall estimates for the variant-exposure (i.e. LDL-C lowering) association using different MR methods.

**Plot B** displays the leave-one-out analysis, which compares the effect estimates when excluding each of the genetic variants in the GRS, one at a time, to the overall estimate including all variants.

**Other chronic ischemic heart diseases (411.8)**

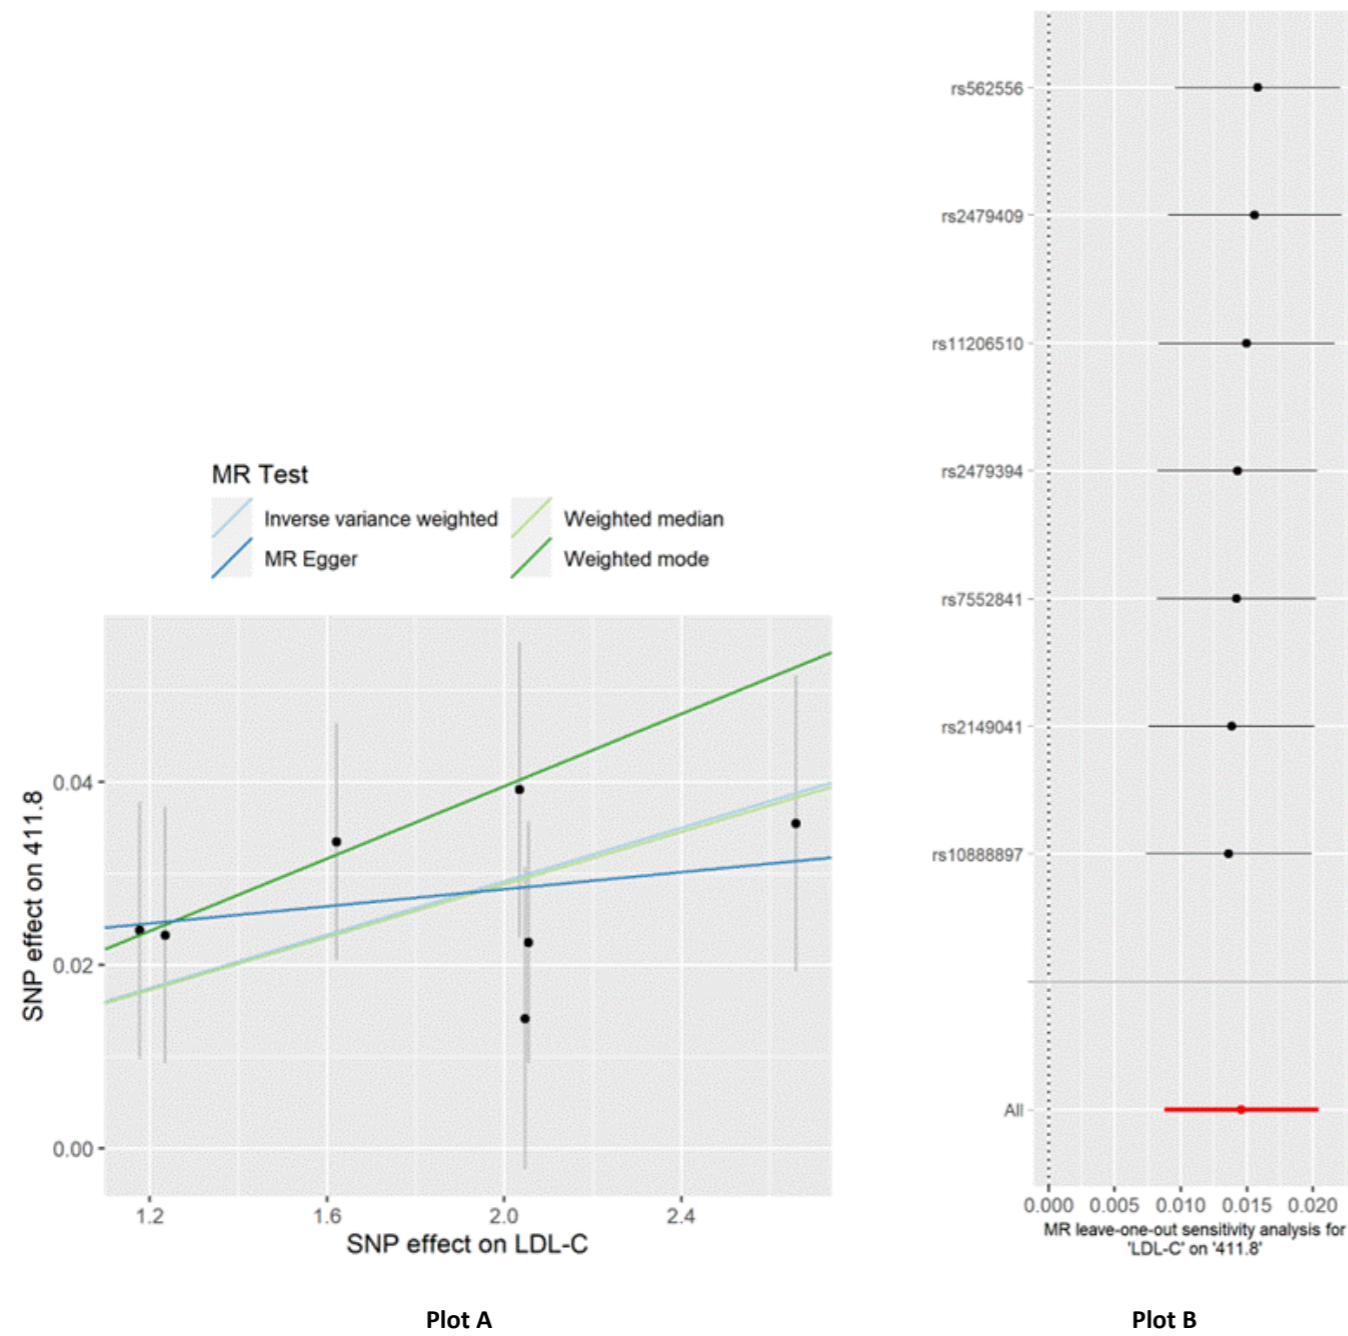

**Plot A** shows the scatter plot of the variant-outcome association estimates for each genetic variant, against the overall estimates for the variant-exposure (i.e. LDL-C lowering) association using different MR methods.

**Plot B** displays the leave-one-out analysis, which compares the effect estimates when excluding each of the genetic variants in the GRS, one at a time, to the overall estimate including all variants.

**Hypertensive heart and/or renal disease (401.2)**

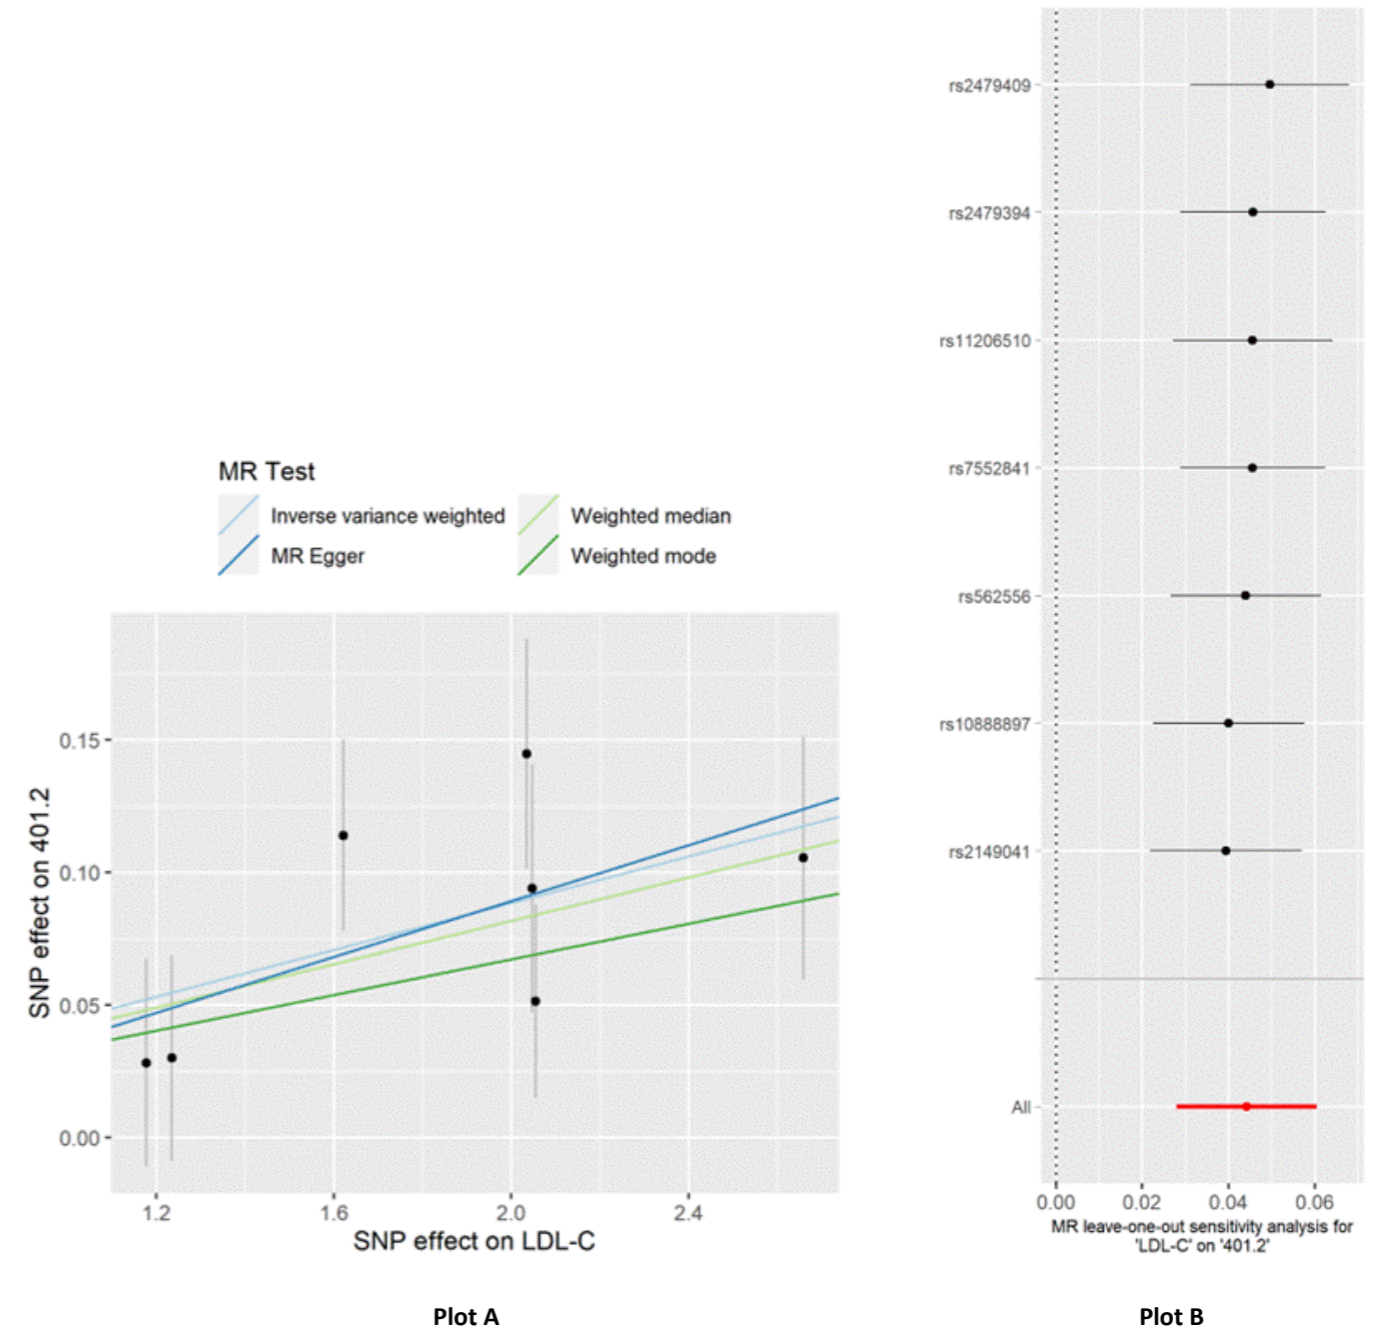

**Plot A** shows the scatter plot of the variant-outcome association estimates for each genetic variant, against the overall estimates for the variant-exposure (i.e. LDL-C lowering) association using different MR methods.

**Plot B** displays the leave-one-out analysis, which compares the effect estimates when excluding each of the genetic variants in the GRS, one at a time, to the overall estimate including all variants.

**Abdominal aortic aneurysm (442.11)**

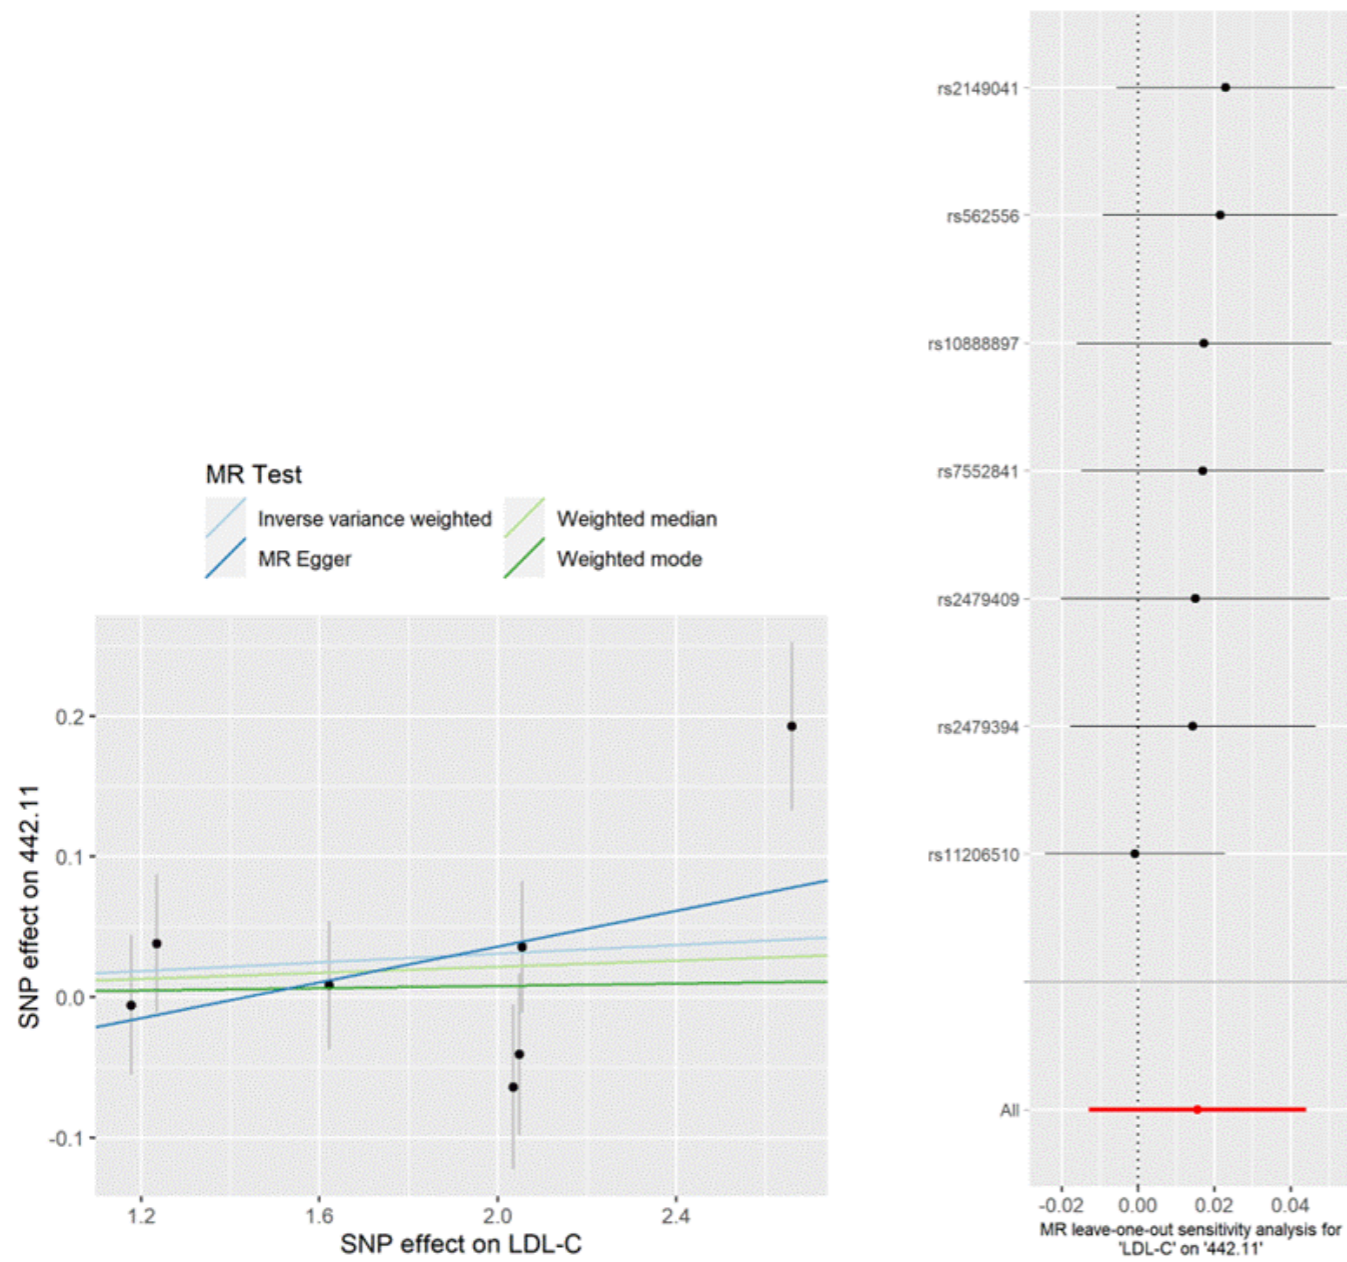

**Plot A**

**Plot B**

**Plot A** shows the scatter plot of the variant-outcome association estimates for each genetic variant, against the overall estimates for the variant-exposure (i.e. LDL-C lowering) association using different MR methods.

**Plot B** displays the leave-one-out analysis, which compares the effect estimates when excluding each of the genetic variants in the GRS, one at a time, to the overall estimate including all variants.

**Peripheral vascular disease (443)**

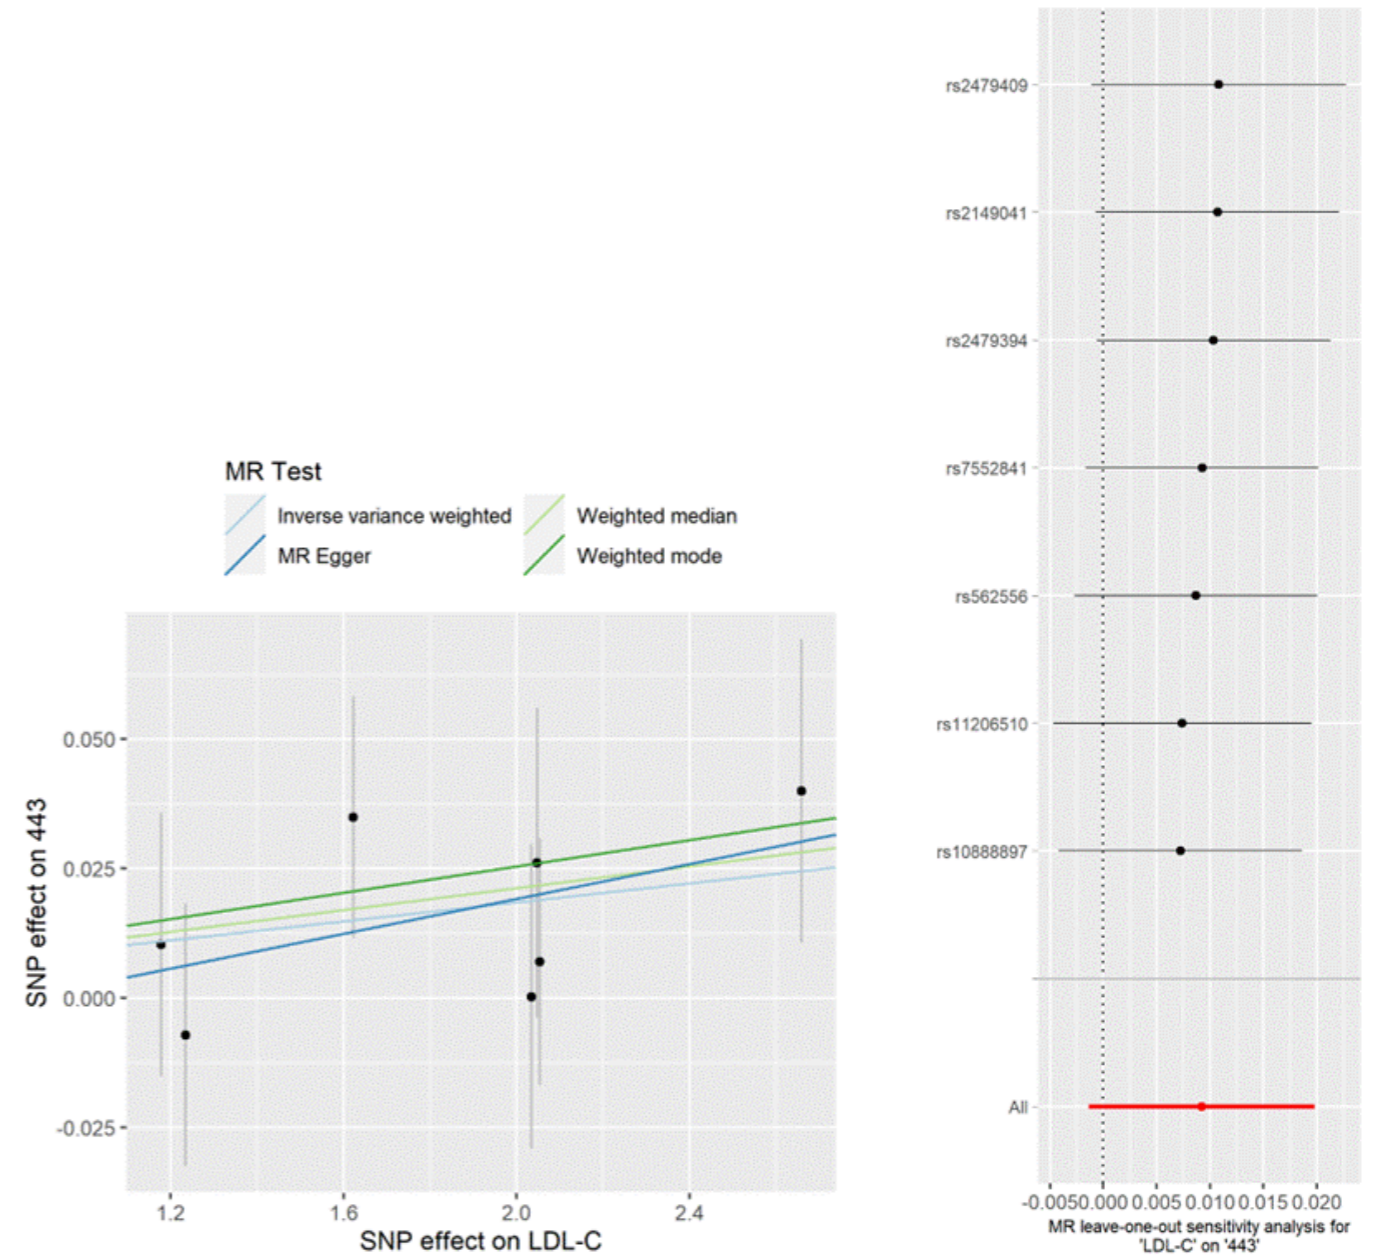

**Plot A**

**Plot B**

**Plot A** shows the scatter plot of the variant-outcome association estimates for each genetic variant, against the overall estimates for the variant-exposure (i.e. LDL-C lowering) association using different MR methods.

**Plot B** displays the leave-one-out analysis, which compares the effect estimates when excluding each of the genetic variants in the GRS, one at a time, to the overall estimate including all variants.

**Hypercholesterolemia (272.11)**

**Diarrhea (561.1)**

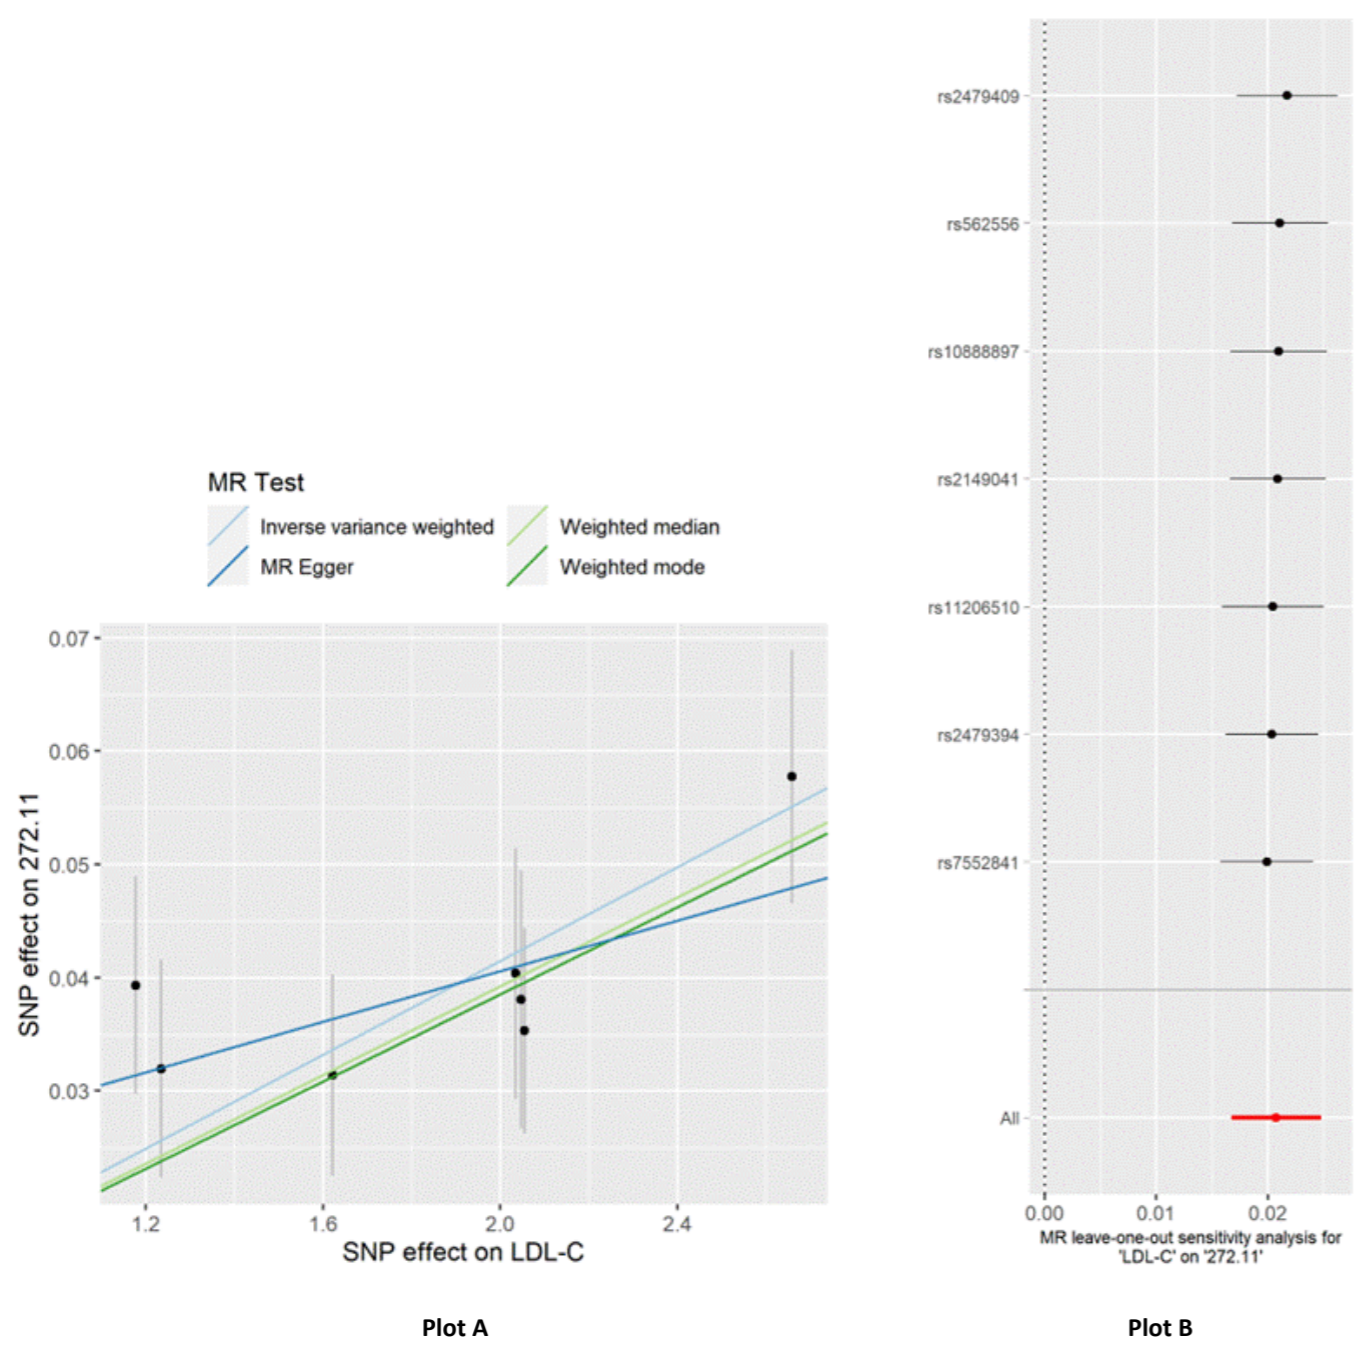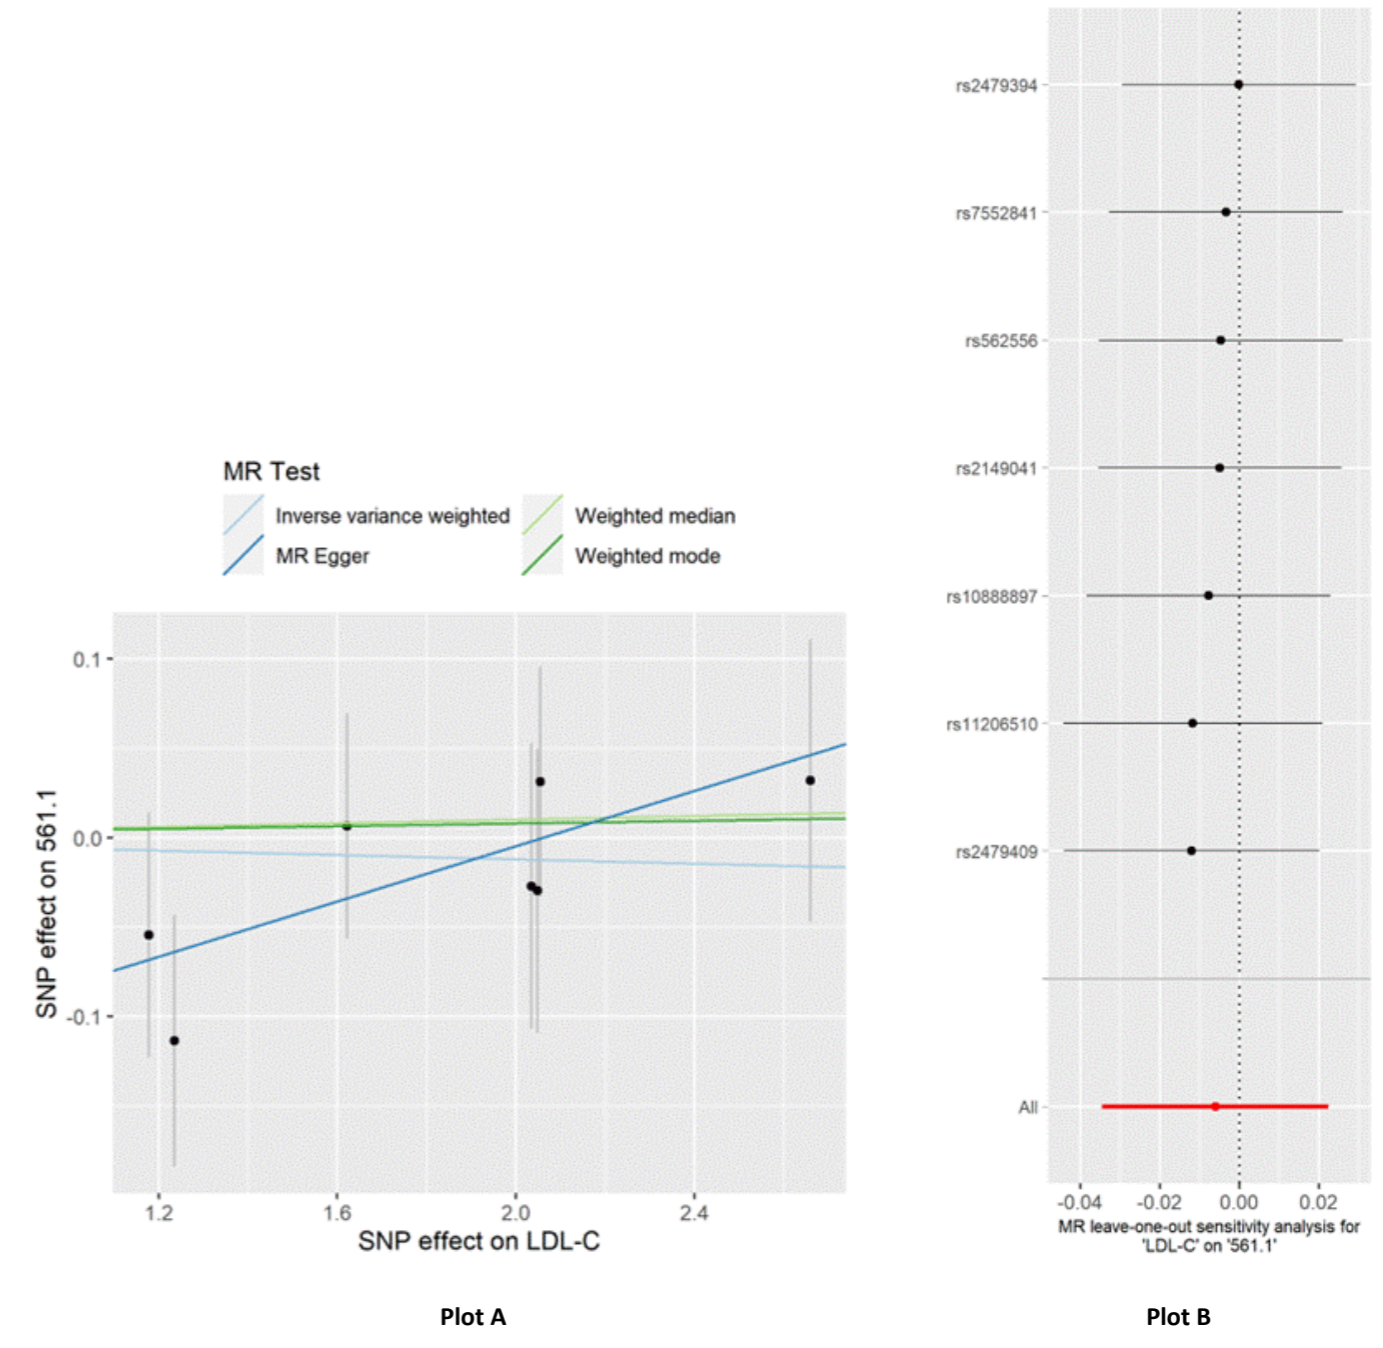

**Plot A** shows the scatter plot of the variant-outcome association estimates for each genetic variant, against the overall estimates for the variant-exposure (i.e. LDL-C lowering) association using different MR methods.

**Plot B** displays the leave-one-out analysis, which compares the effect estimates when excluding each of the genetic variants in the GRS, one at a time, to the overall estimate including all variants.

**Plot A** shows the scatter plot of the variant-outcome association estimates for each genetic variant, against the overall estimates for the variant-exposure (i.e. LDL-C lowering) association using different MR methods.

**Plot B** displays the leave-one-out analysis, which compares the effect estimates when excluding each of the genetic variants in the GRS, one at a time, to the overall estimate including all variants.

**Supplementary Figure 2:** Plots for the 10 distinct LDL-C-disease associations significant under FDR correction, for the PCSK9 genetic risk score.

**Unstable angina (411.1)**

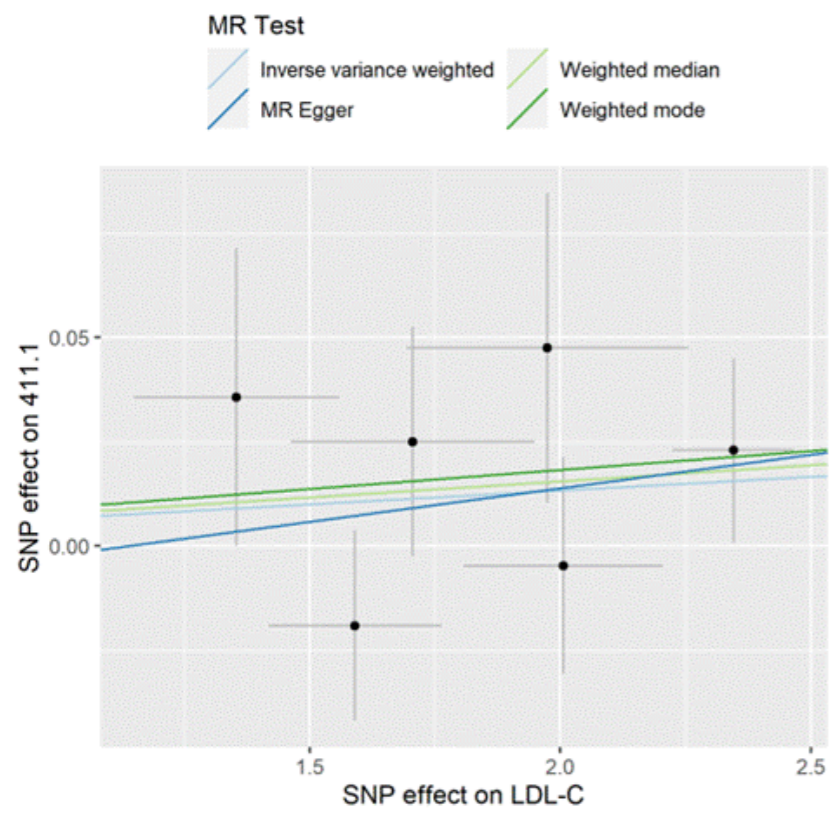

**Plot A**

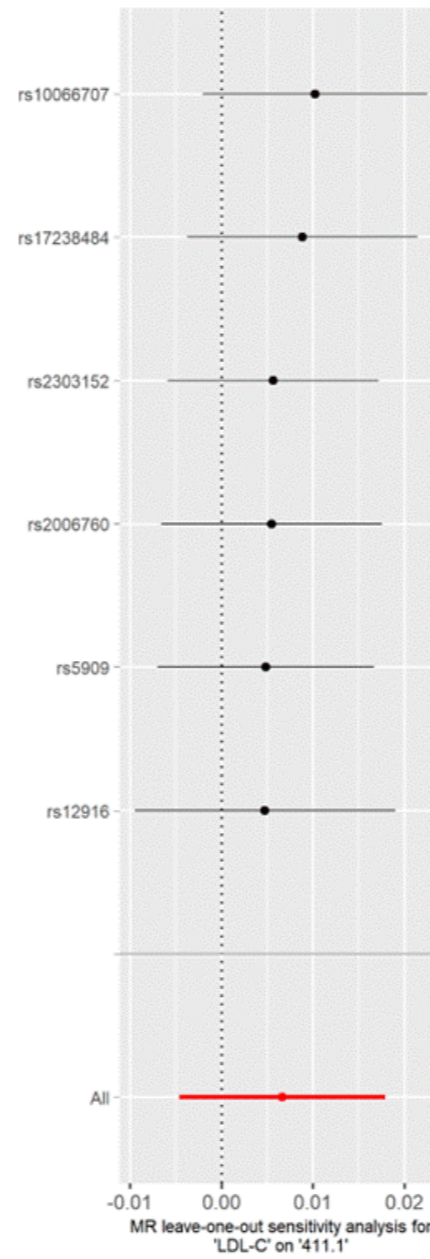

**Plot B**

**Plot A** shows the scatter plot of the variant-outcome association estimates for each genetic variant, against the overall estimates for the variant-exposure (i.e. LDL-C lowering) association using different MR methods.

**Plot B** displays the leave-one-out analysis, which compares the effect estimates when excluding each of the genetic variants in the GRS, one at a time, to the overall estimate including all variants.

**Myocardial infarction (411.2)**

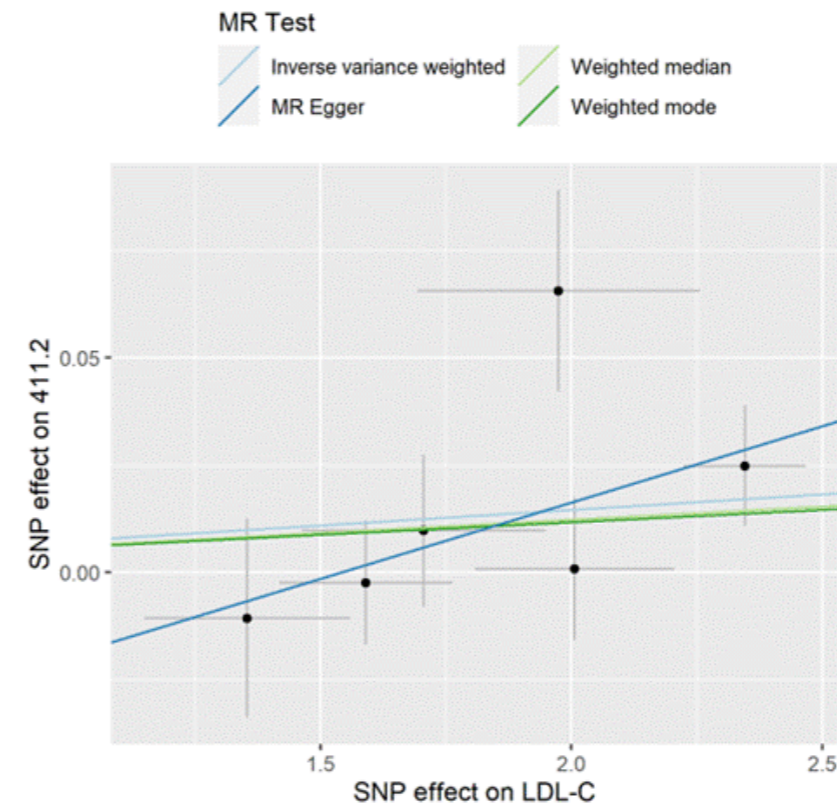

**Plot A**

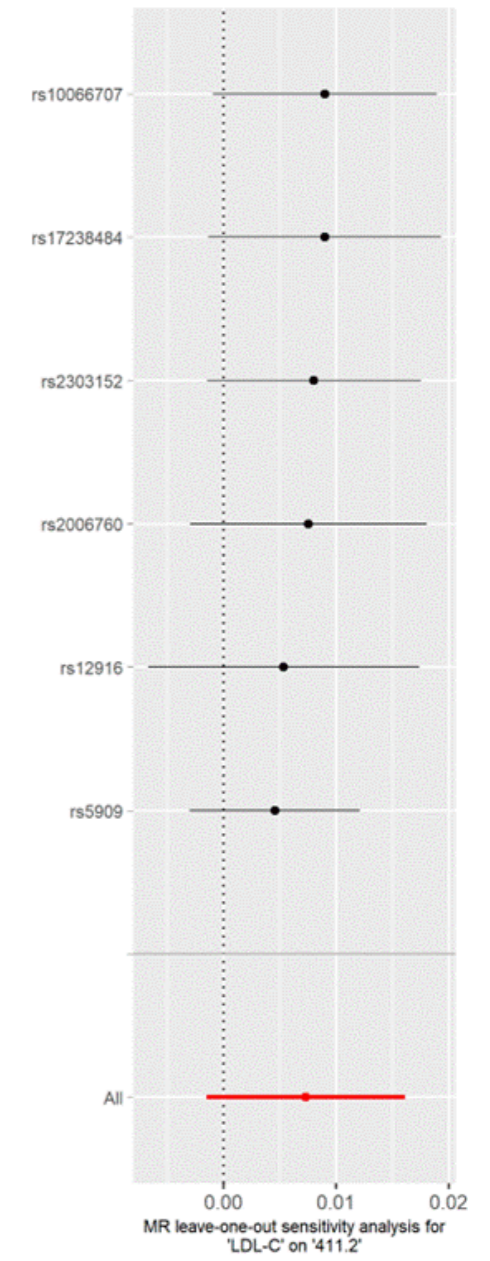

**Plot B**

**Plot A** shows the scatter plot of the variant-outcome association estimates for each genetic variant, against the overall estimates for the variant-exposure (i.e. LDL-C lowering) association using different MR methods.

**Plot B** displays the leave-one-out analysis, which compares the effect estimates when excluding each of the genetic variants in the GRS, one at a time, to the overall estimate including all variants.

### Angina pectoris (411.3)

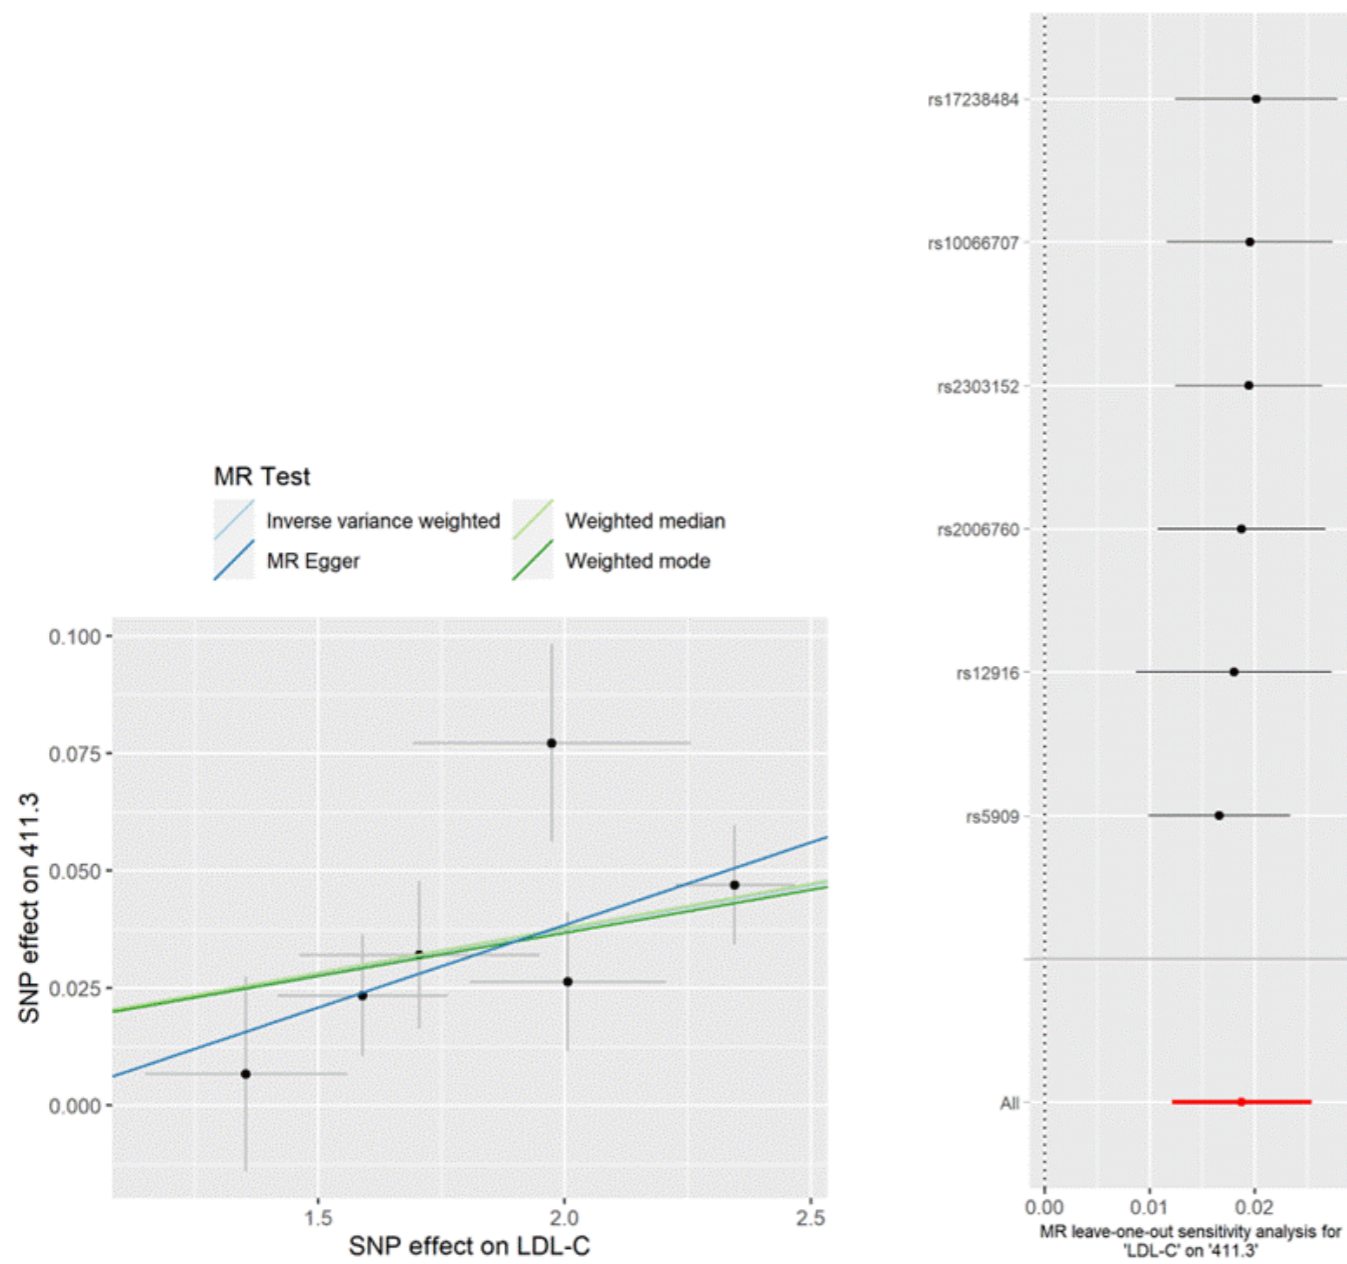

Plot A

Plot B

**Plot A** shows the scatter plot of the variant-outcome association estimates for each genetic variant, against the overall estimates for the variant-exposure (i.e. LDL-C lowering) association using different MR methods.

**Plot B** displays the leave-one-out analysis, which compares the effect estimates when excluding each of the genetic variants in the GRS, one at a time, to the overall estimate including all variants.

### Coronary atherosclerosis (411.4)

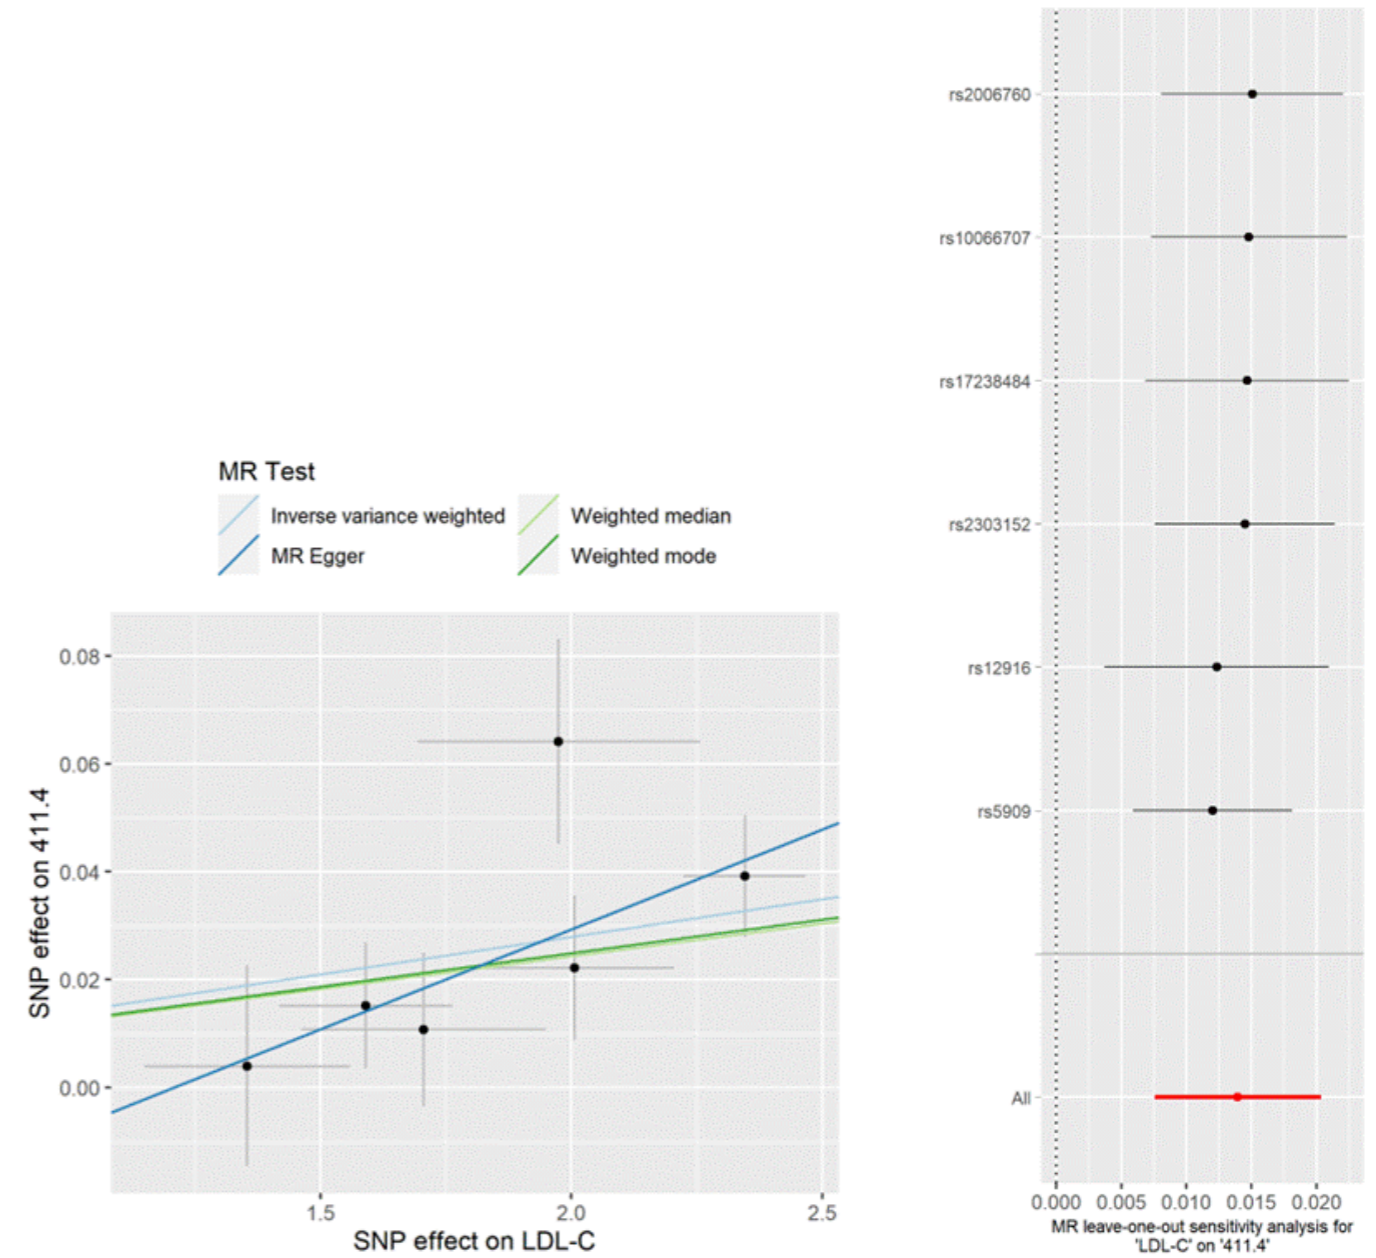

Plot A

Plot B

**Plot A** shows the scatter plot of the variant-outcome association estimates for each genetic variant, against the overall estimates for the variant-exposure (i.e. LDL-C lowering) association using different MR methods.

**Plot B** displays the leave-one-out analysis, which compares the effect estimates when excluding each of the genetic variants in the GRS, one at a time, to the overall estimate including all variants.

**Other chronic ischemic heart diseases (411.8)**

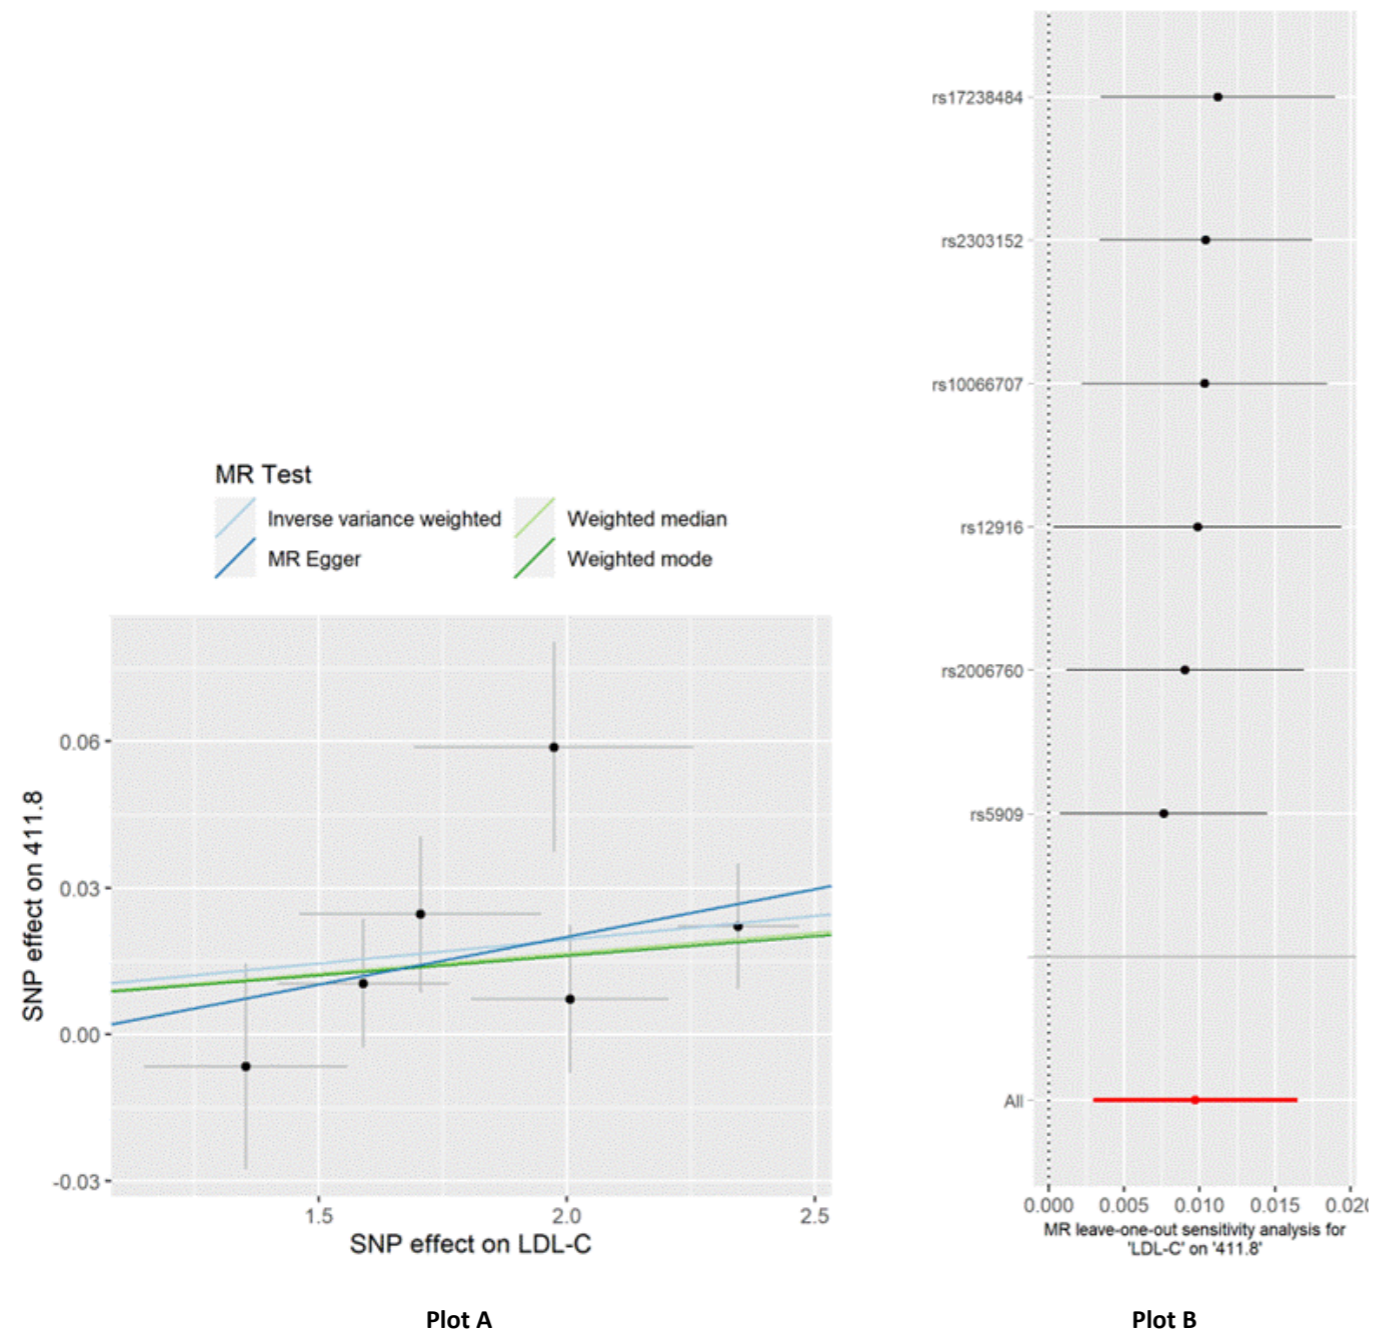

**Plot A** shows the scatter plot of the variant-outcome association estimates for each genetic variant, against the overall estimates for the variant-exposure (i.e. LDL-C lowering) association using different MR methods.

**Plot B** displays the leave-one-out analysis, which compares the effect estimates when excluding each of the genetic variants in the GRS, one at a time, to the overall estimate including all variants.

**Hypertensive heart and/or renal disease (401.2)**

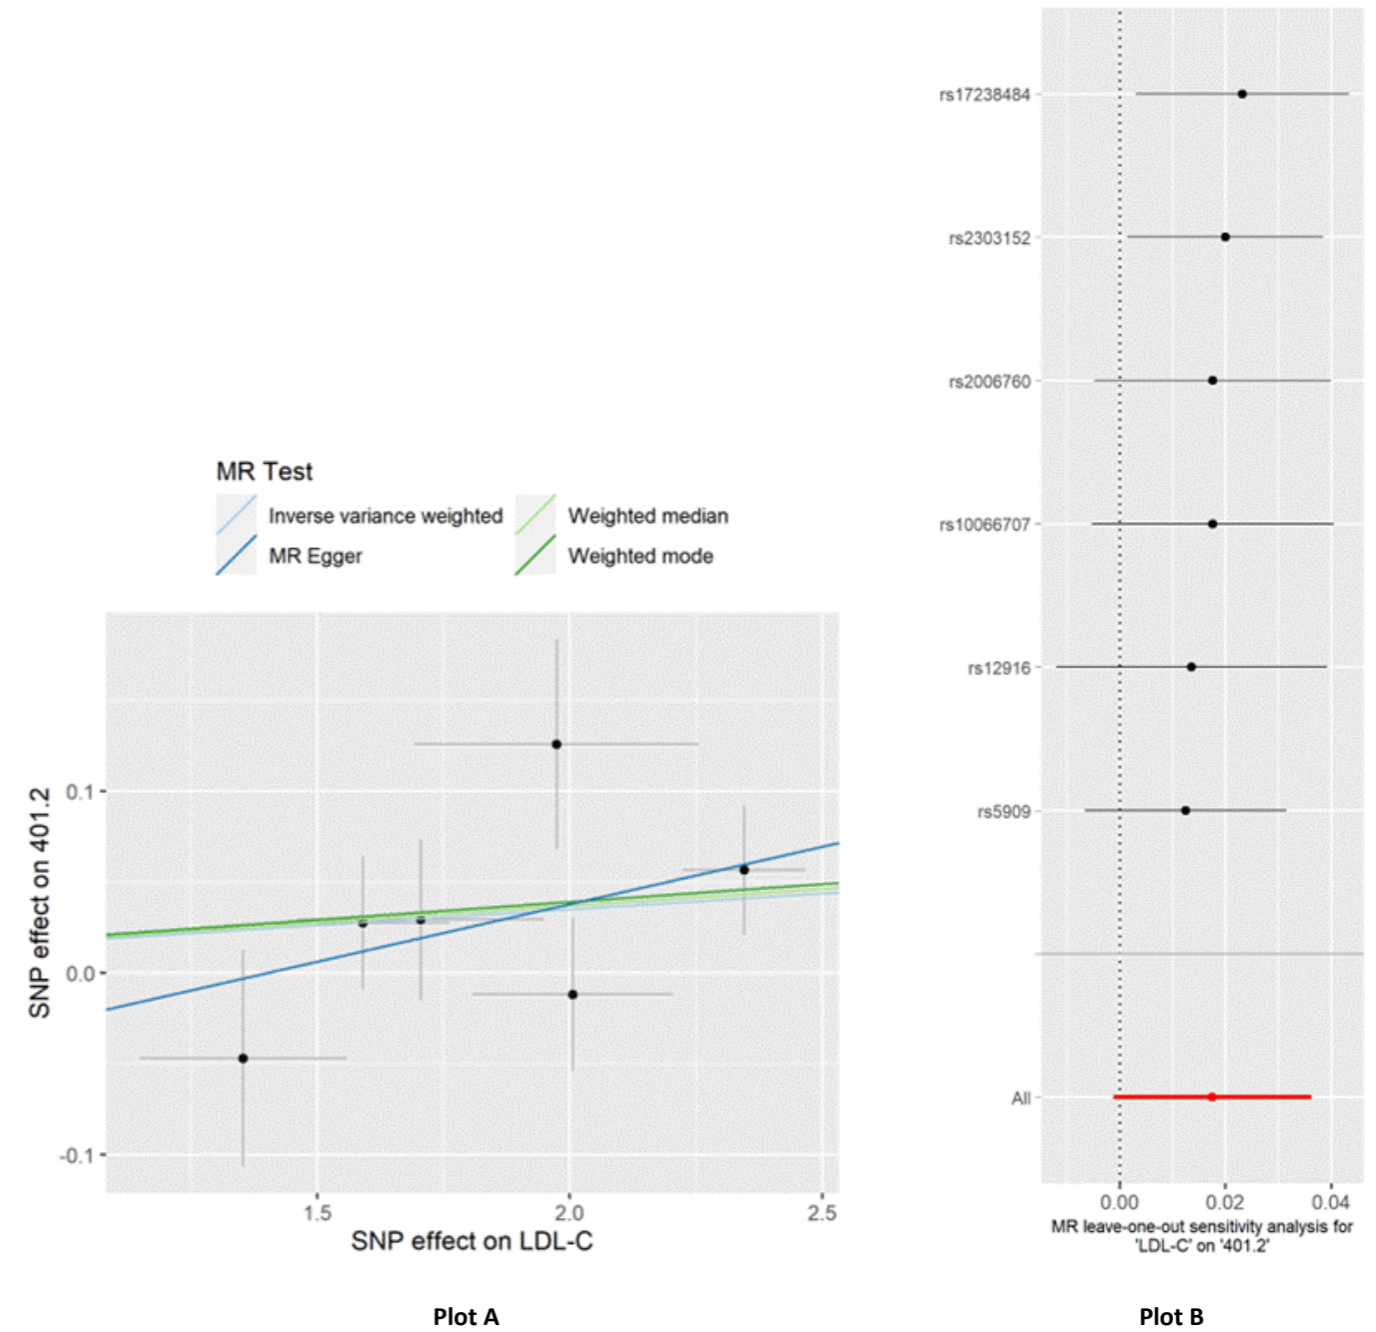

**Plot A** shows the scatter plot of the variant-outcome association estimates for each genetic variant, against the overall estimates for the variant-exposure (i.e. LDL-C lowering) association using different MR methods.

**Plot B** displays the leave-one-out analysis, which compares the effect estimates when excluding each of the genetic variants in the GRS, one at a time, to the overall estimate including all variants.

**Abdominal aortic aneurysm (442.11)**

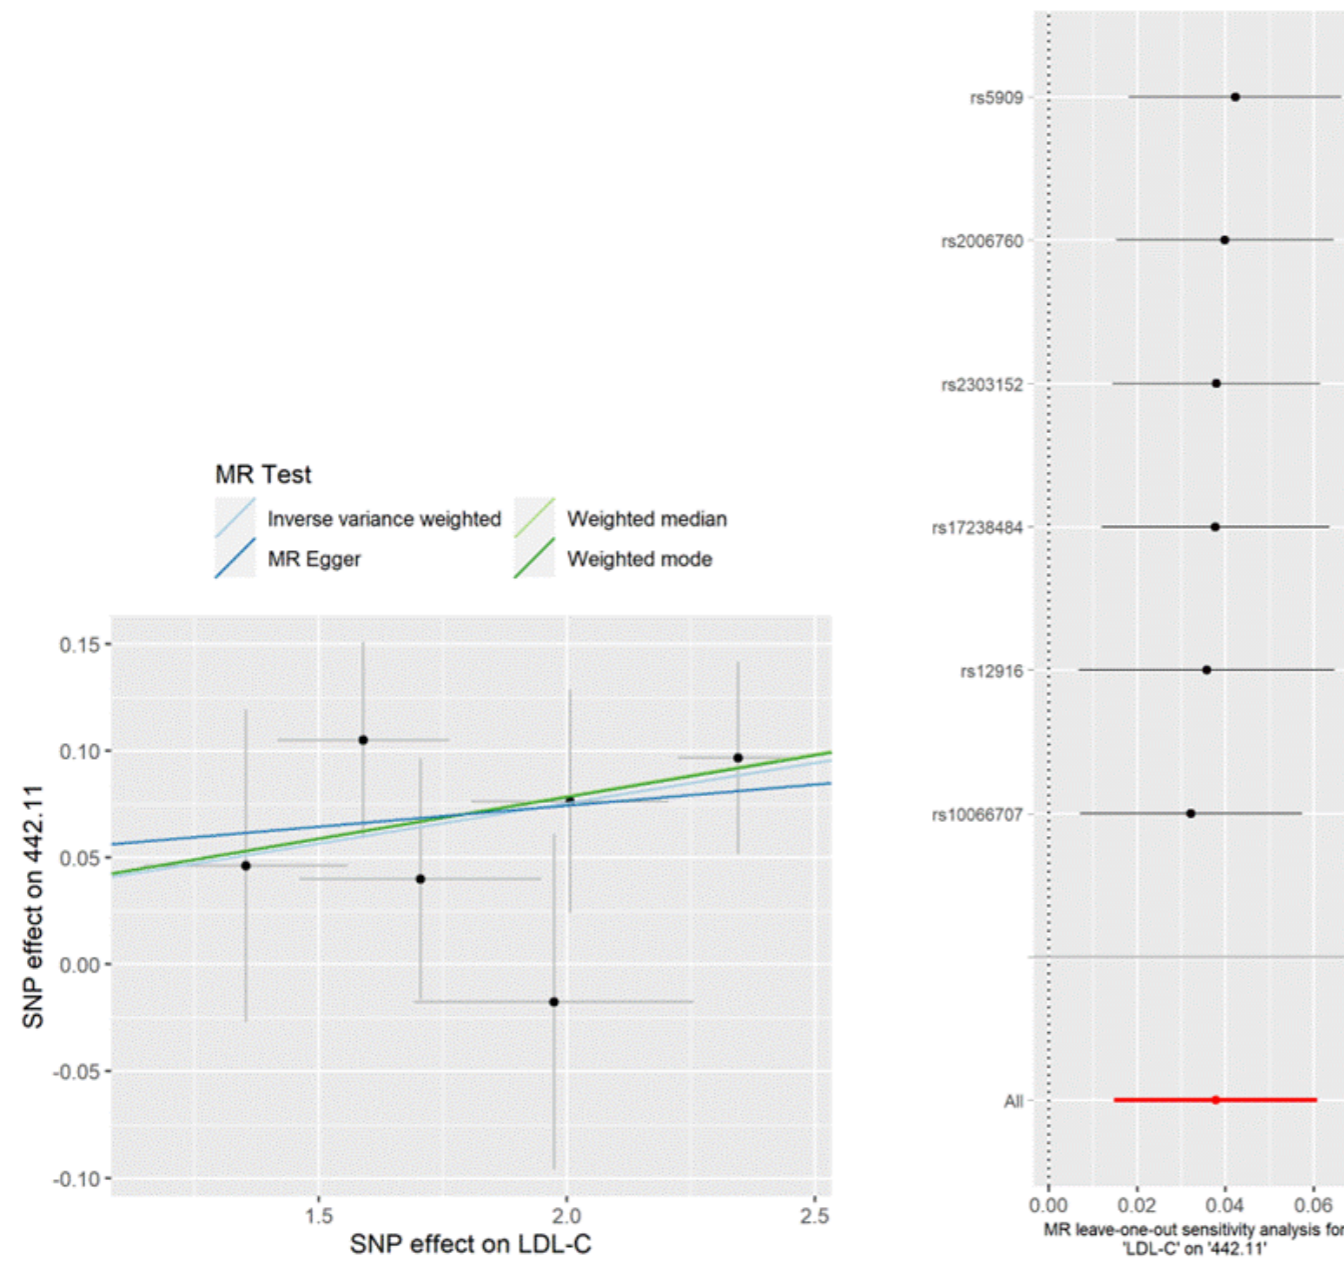

**Plot A**

**Plot B**

**Plot A** shows the scatter plot of the variant-outcome association estimates for each genetic variant, against the overall estimates for the variant-exposure (i.e. LDL-C lowering) association using different MR methods.

**Plot B** displays the leave-one-out analysis, which compares the effect estimates when excluding each of the genetic variants in the GRS, one at a time, to the overall estimate including all variants.

**Peripheral vascular disease (443)**

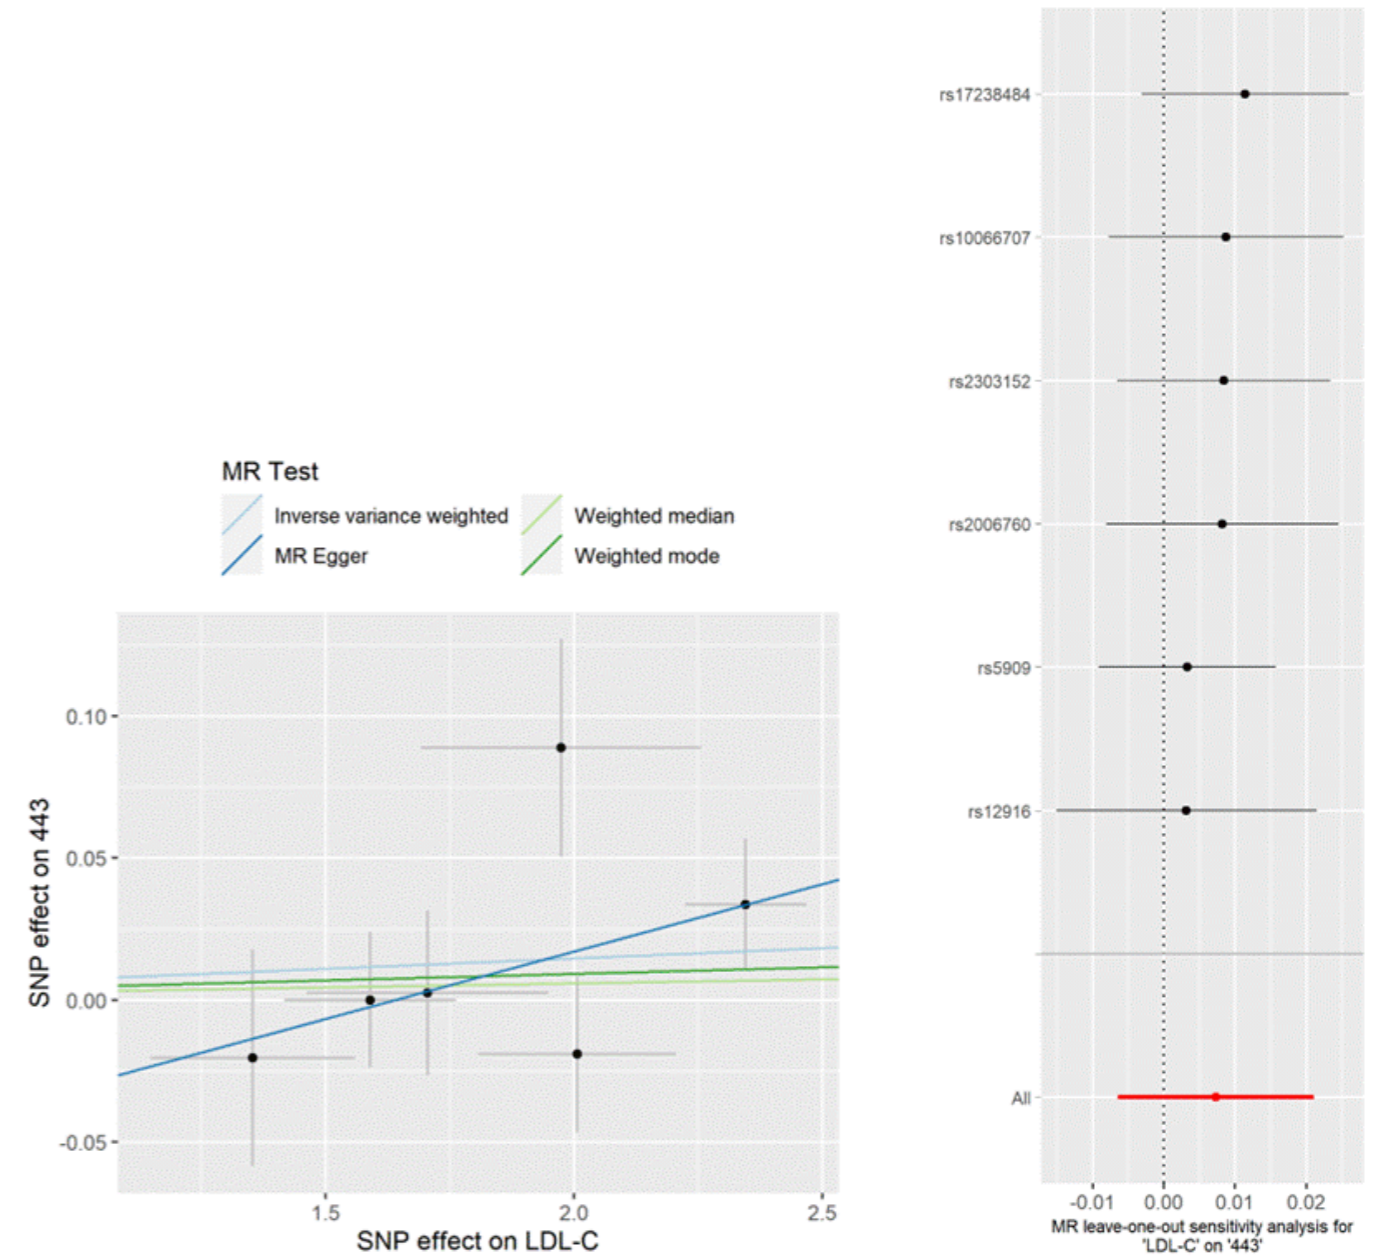

**Plot A**

**Plot B**

**Plot A** shows the scatter plot of the variant-outcome association estimates for each genetic variant, against the overall estimates for the variant-exposure (i.e. LDL-C lowering) association using different MR methods.

**Plot B** displays the leave-one-out analysis, which compares the effect estimates when excluding each of the genetic variants in the GRS, one at a time, to the overall estimate including all variants.



**Hypercholesterolemia (272.11)**

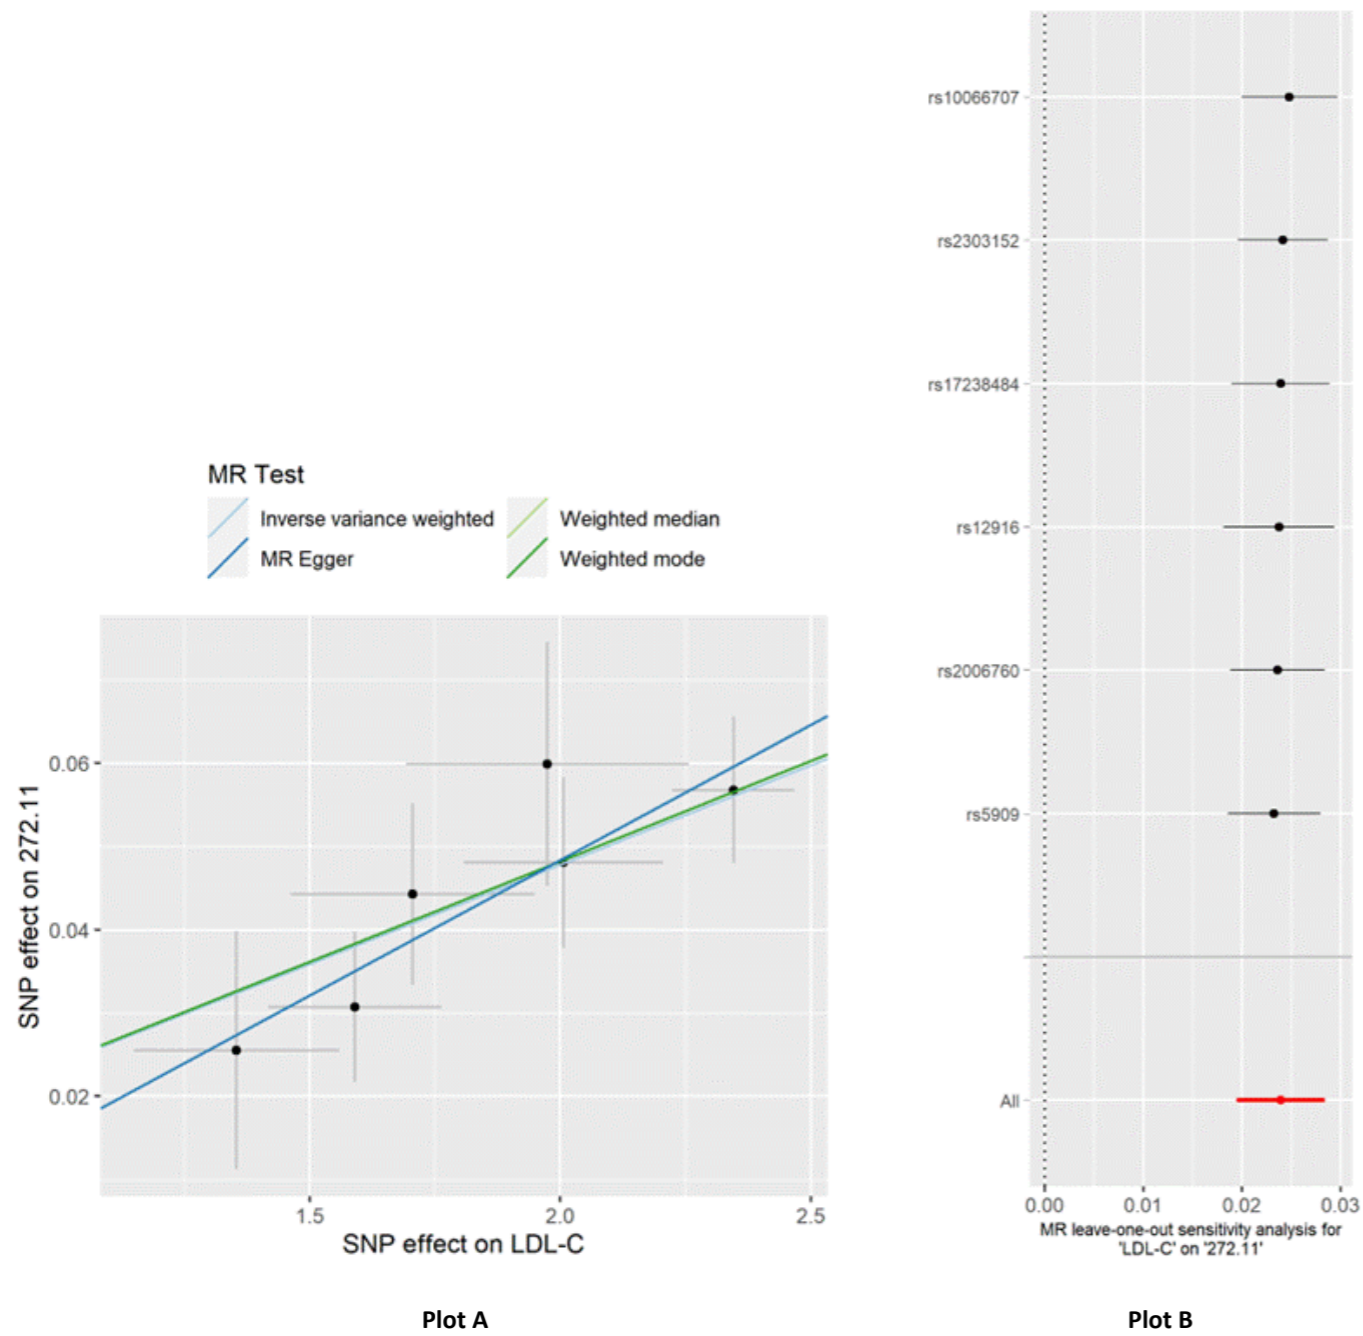

**Plot A** shows the scatter plot of the variant-outcome association estimates for each genetic variant, against the overall estimates for the variant-exposure (i.e. LDL-C lowering) association using different MR methods.

**Plot B** displays the leave-one-out analysis, which compares the effect estimates when excluding each of the genetic variants in the GRS, one at a time, to the overall estimate including all variants.

**Diarrhea (561.1)**

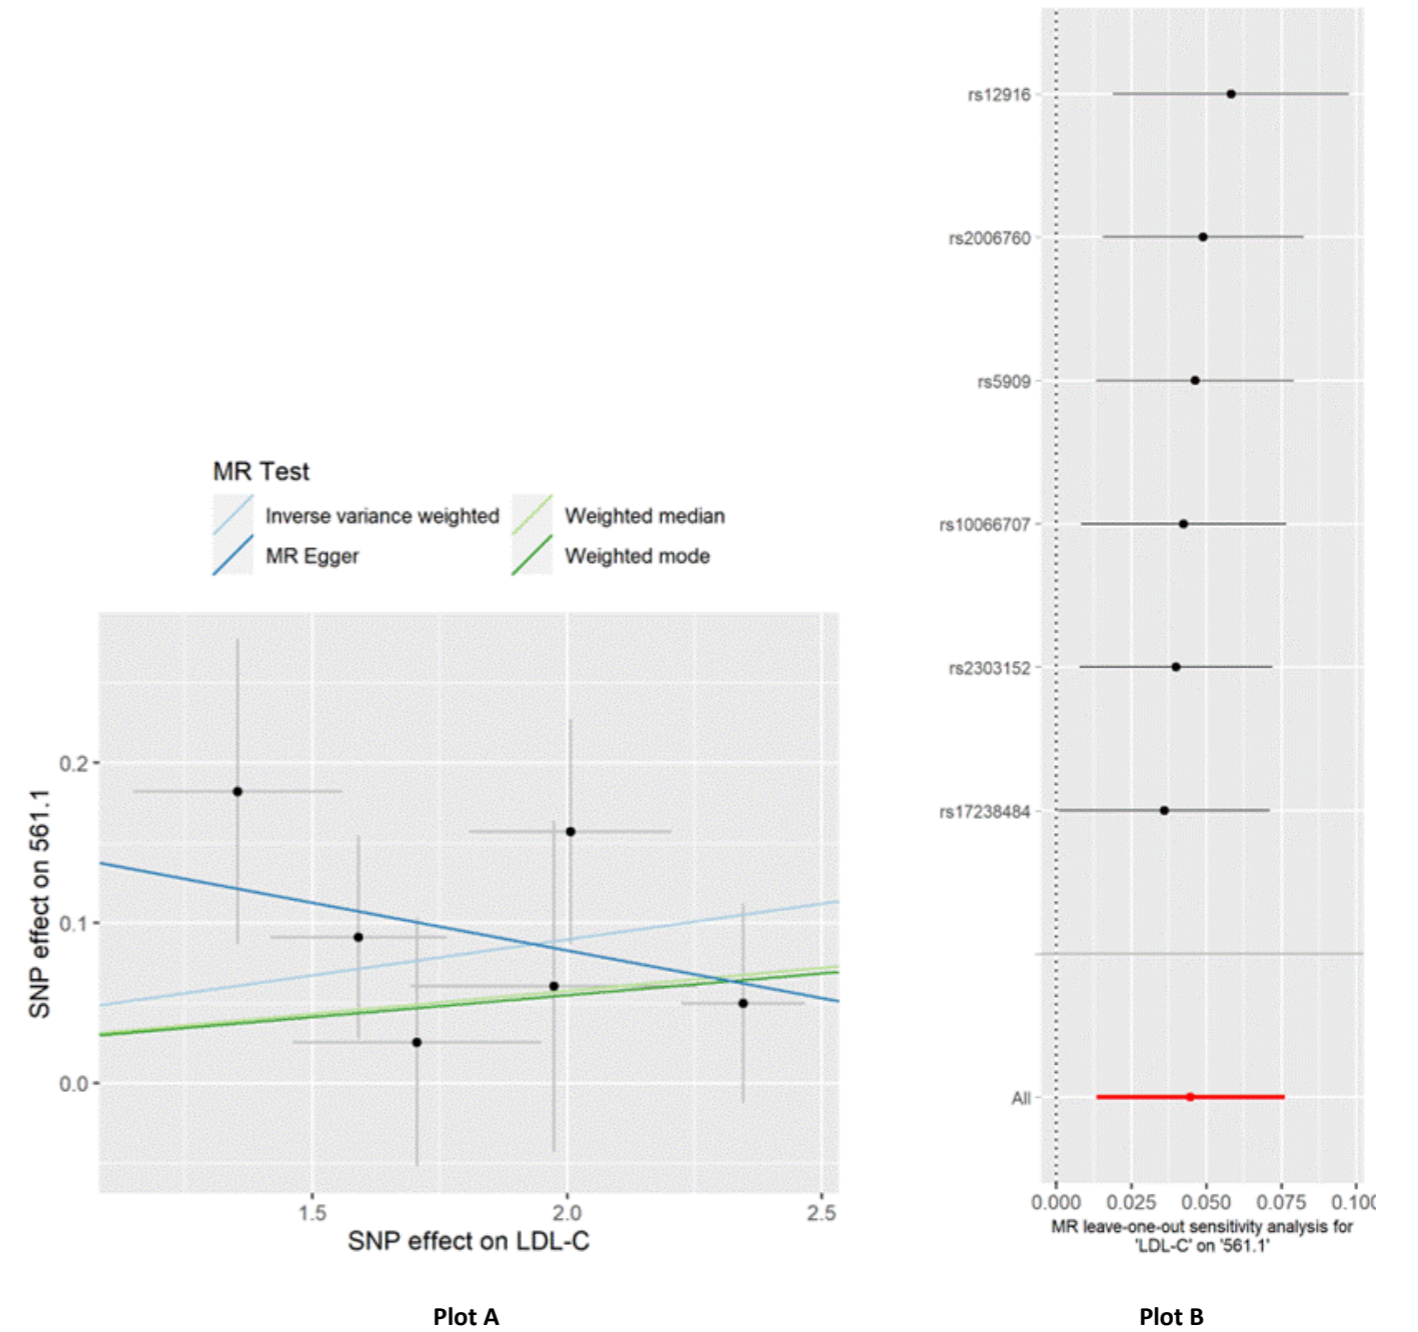

**Plot A** shows the scatter plot of the variant-outcome association estimates for each genetic variant, against the overall estimates for the variant-exposure (i.e. LDL-C lowering) association using different MR methods.

**Plot B** displays the leave-one-out analysis, which compares the effect estimates when excluding each of the genetic variants in the GRS, one at a time, to the overall estimate including all variants.

**Supplementary Figure 3:** Plots for the 10 distinct LDL-C-disease associations significant under FDR correction, for the HMGCR genetic risk score.

**Unstable angina (411.1)**

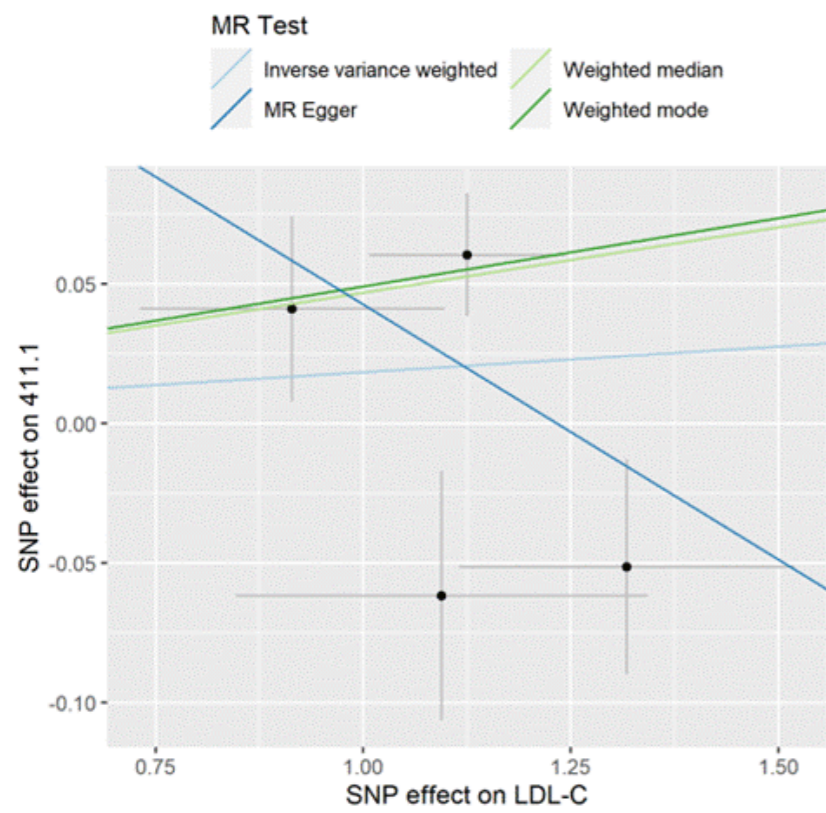

**Plot A**

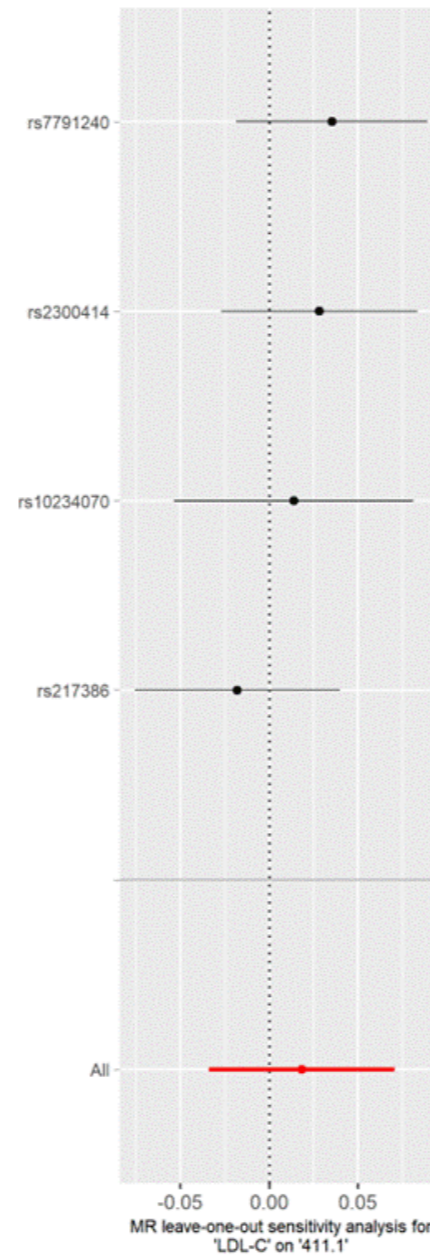

**Plot B**

**Plot A** shows the scatter plot of the variant-outcome association estimates for each genetic variant, against the overall estimates for the variant-exposure (i.e. LDL-C lowering) association using different MR methods.

**Plot B** displays the leave-one-out analysis, which compares the effect estimates when excluding each of the genetic variants in the GRS, one at a time, to the overall estimate including all variants.

**Myocardial infarction (411.2)**

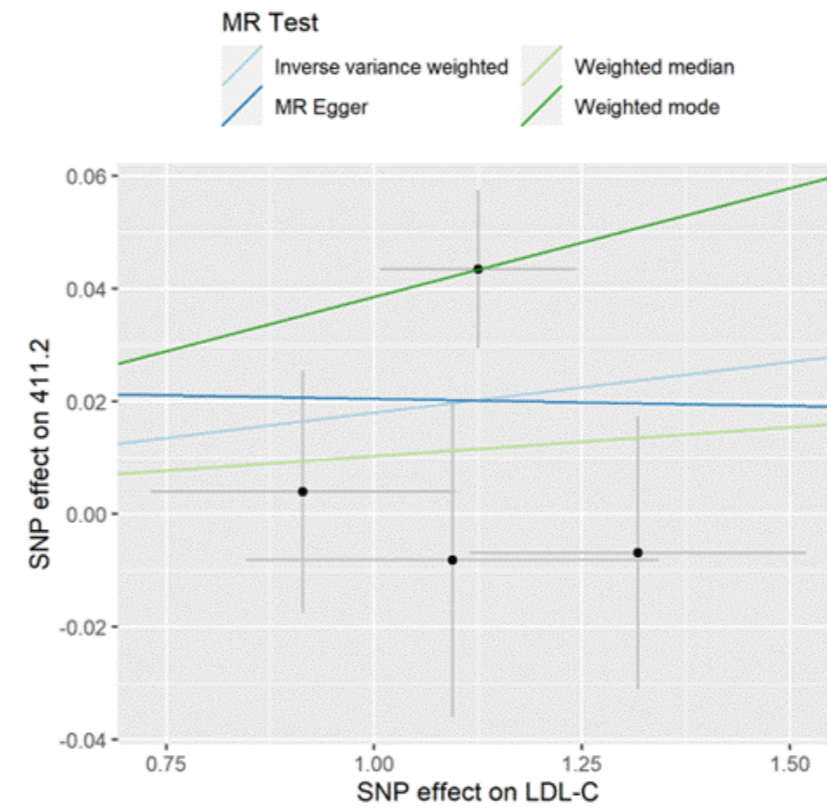

**Plot A**

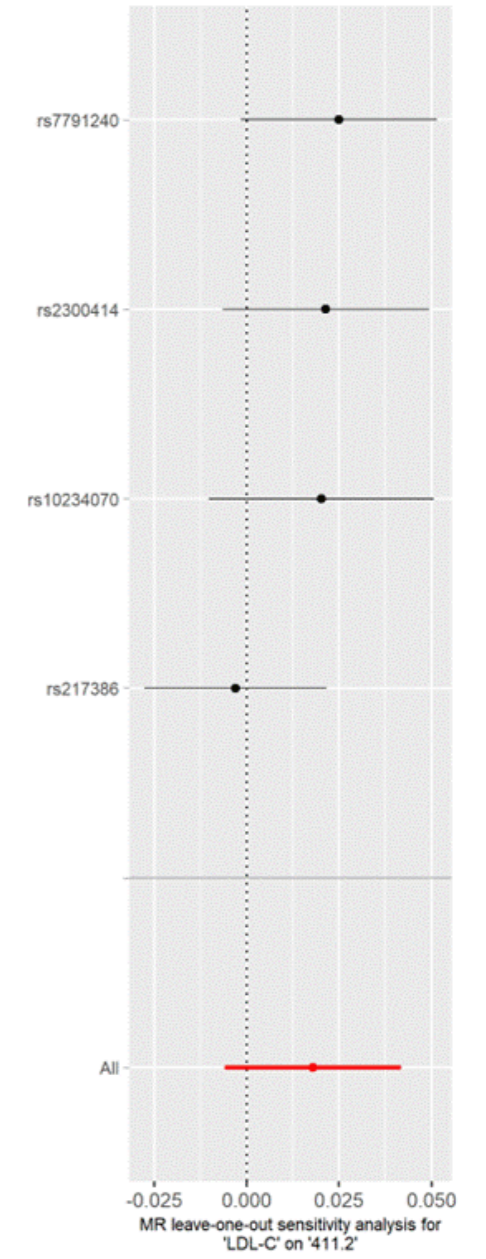

**Plot B**

**Plot A** shows the scatter plot of the variant-outcome association estimates for each genetic variant, against the overall estimates for the variant-exposure (i.e. LDL-C lowering) association using different MR methods.

**Plot B** displays the leave-one-out analysis, which compares the effect estimates when excluding each of the genetic variants in the GRS, one at a time, to the overall estimate including all variants.

Angina pectoris (411.3)

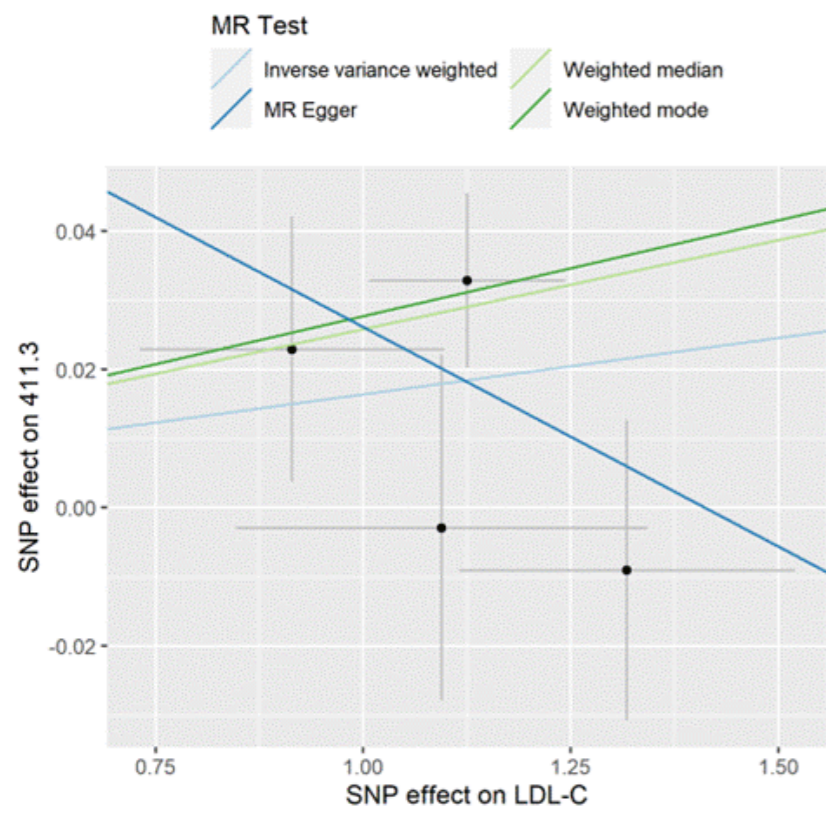

Plot A

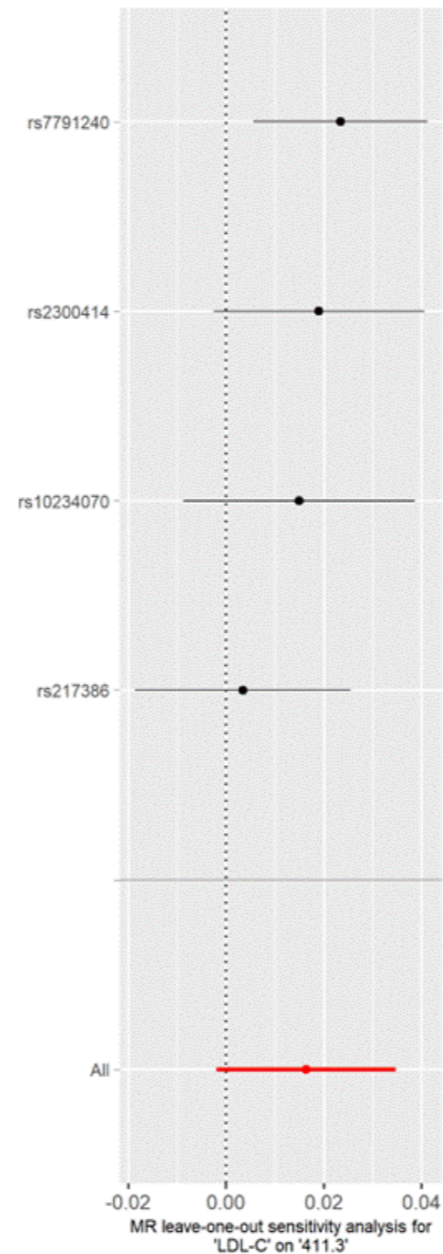

Plot B

**Plot A** shows the scatter plot of the variant-outcome association estimates for each genetic variant, against the overall estimates for the variant-exposure (i.e. LDL-C lowering) association using different MR methods.

**Plot B** displays the leave-one-out analysis, which compares the effect estimates when excluding each of the genetic variants in the GRS, one at a time, to the overall estimate including all variants.

Coronary atherosclerosis (411.4)

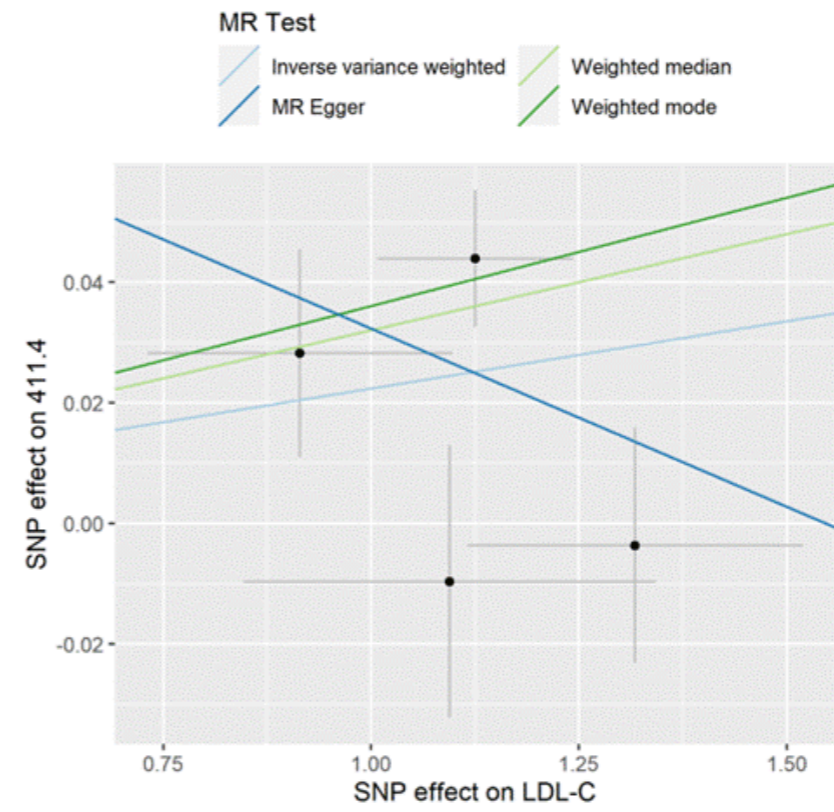

Plot A

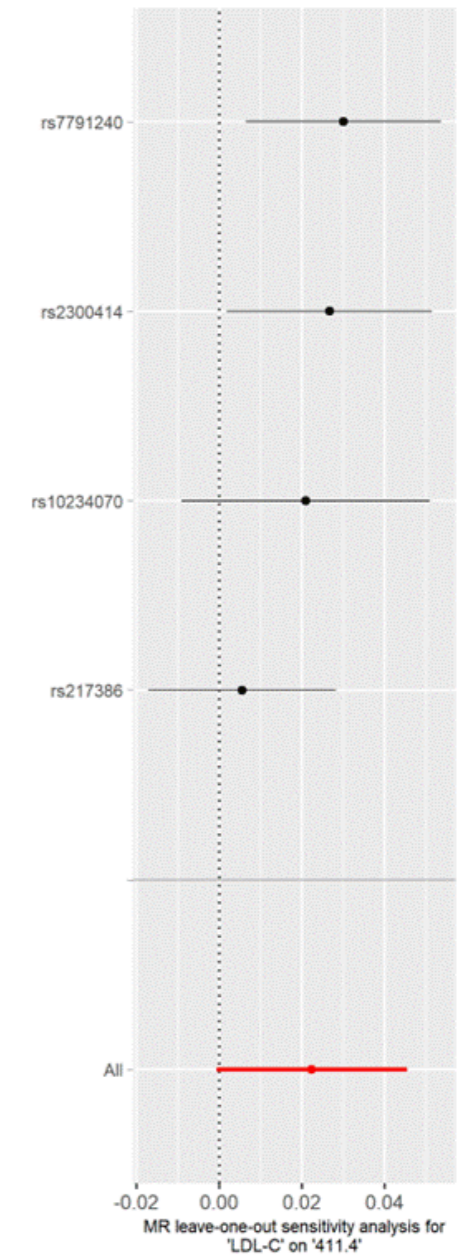

Plot B

**Plot A** shows the scatter plot of the variant-outcome association estimates for each genetic variant, against the overall estimates for the variant-exposure (i.e. LDL-C lowering) association using different MR methods.

**Plot B** displays the leave-one-out analysis, which compares the effect estimates when excluding each of the genetic variants in the GRS, one at a time, to the overall estimate including all variants.

**Other chronic ischemic heart diseases (411.8)**

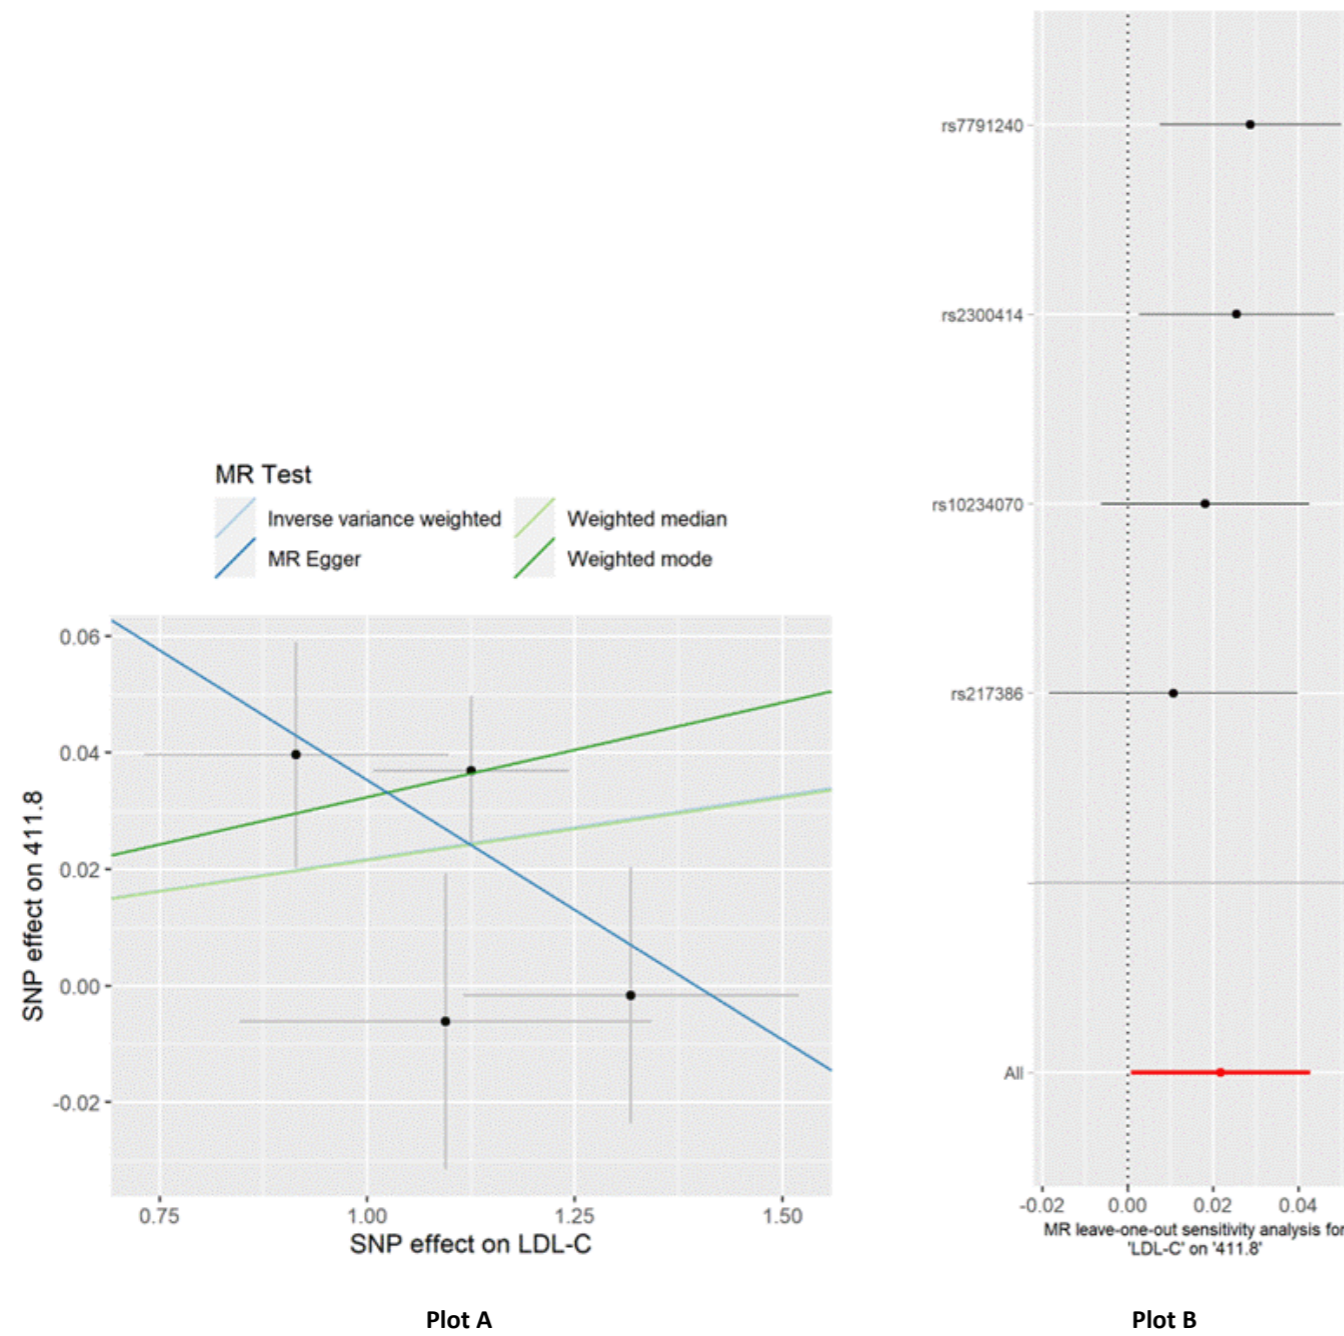

**Plot A** shows the scatter plot of the variant-outcome association estimates for each genetic variant, against the overall estimates for the variant-exposure (i.e. LDL-C lowering) association using different MR methods.

**Plot B** displays the leave-one-out analysis, which compares the effect estimates when excluding each of the genetic variants in the GRS, one at a time, to the overall estimate including all variants.

**Hypertensive heart and/or renal disease (401.2)**

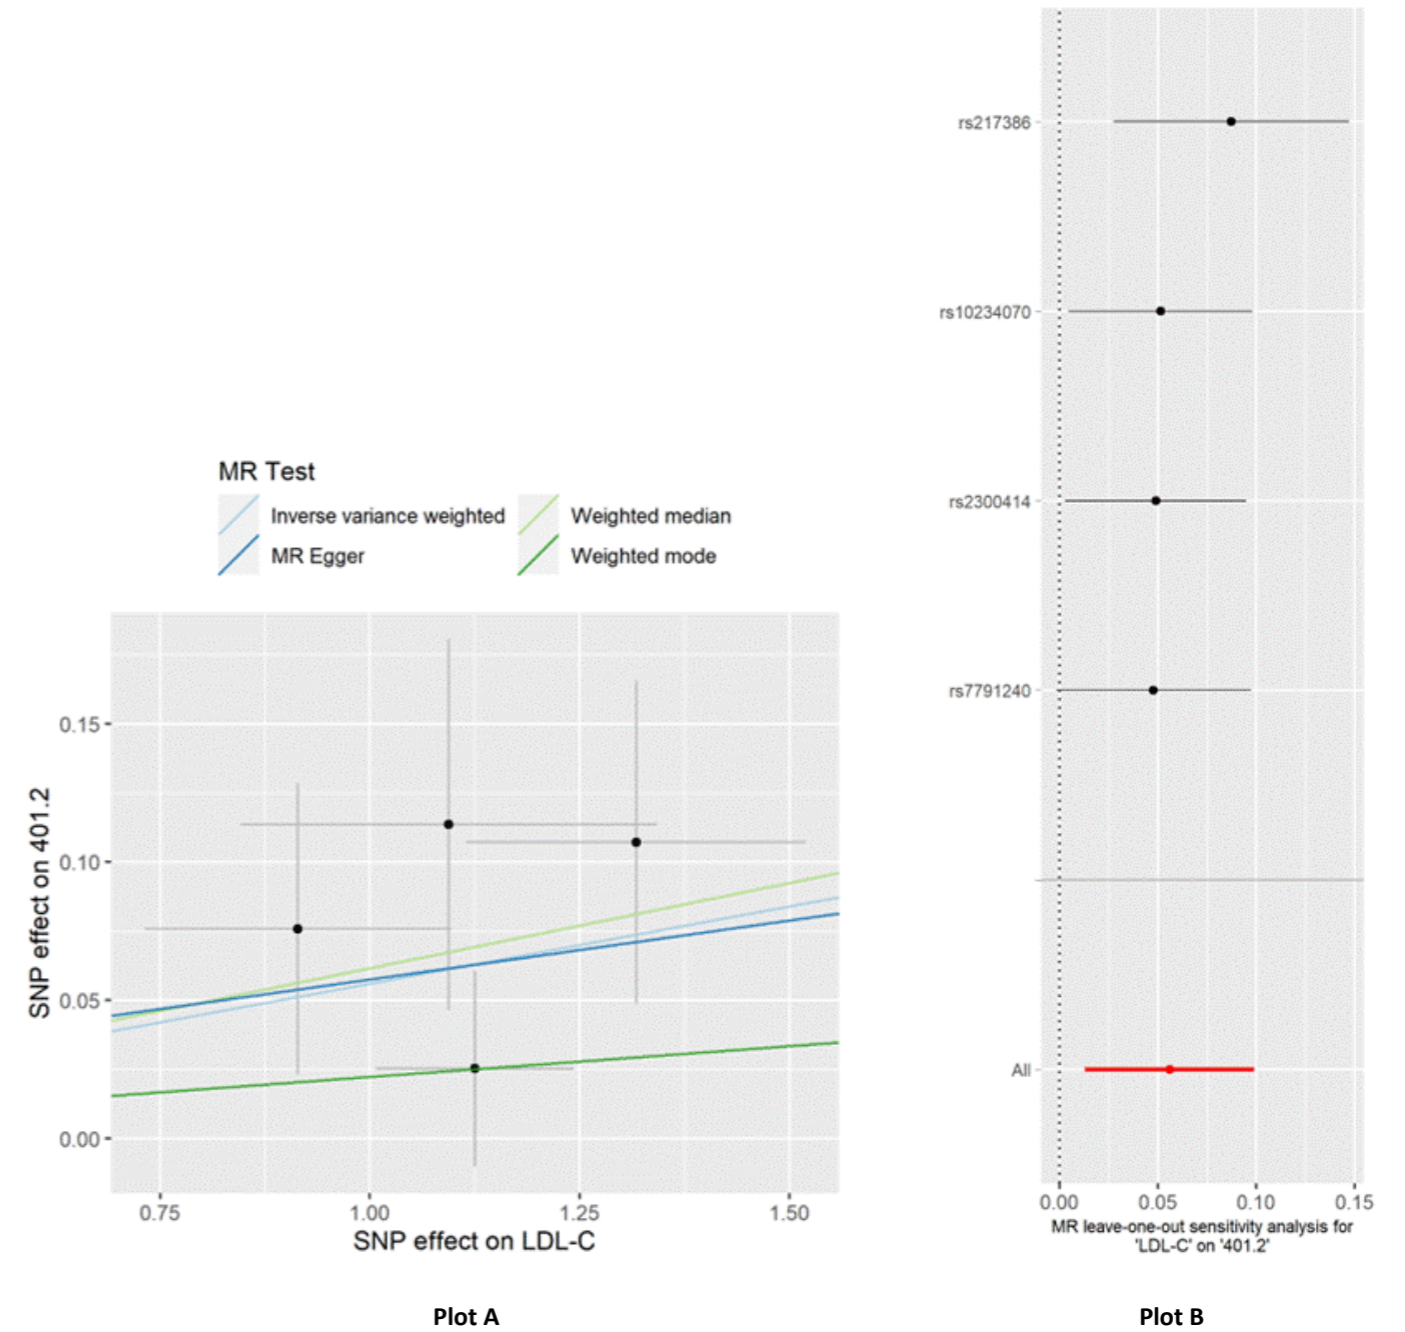

**Plot A** shows the scatter plot of the variant-outcome association estimates for each genetic variant, against the overall estimates for the variant-exposure (i.e. LDL-C lowering) association using different MR methods.

**Plot B** displays the leave-one-out analysis, which compares the effect estimates when excluding each of the genetic variants in the GRS, one at a time, to the overall estimate including all variants.

**Abdominal aortic aneurysm (442.11)**

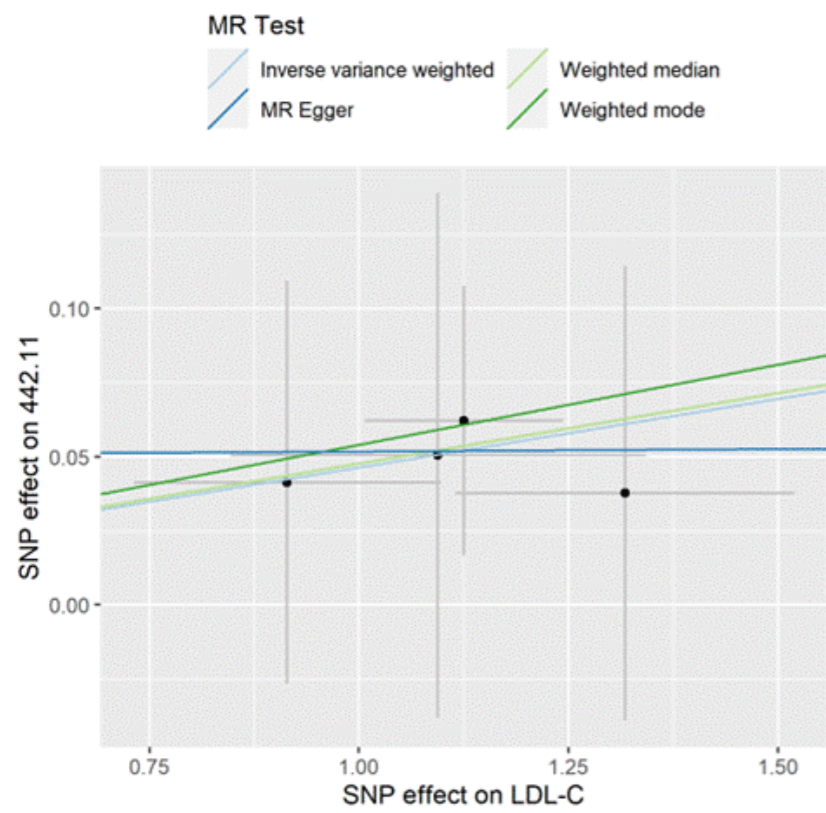

**Plot A**

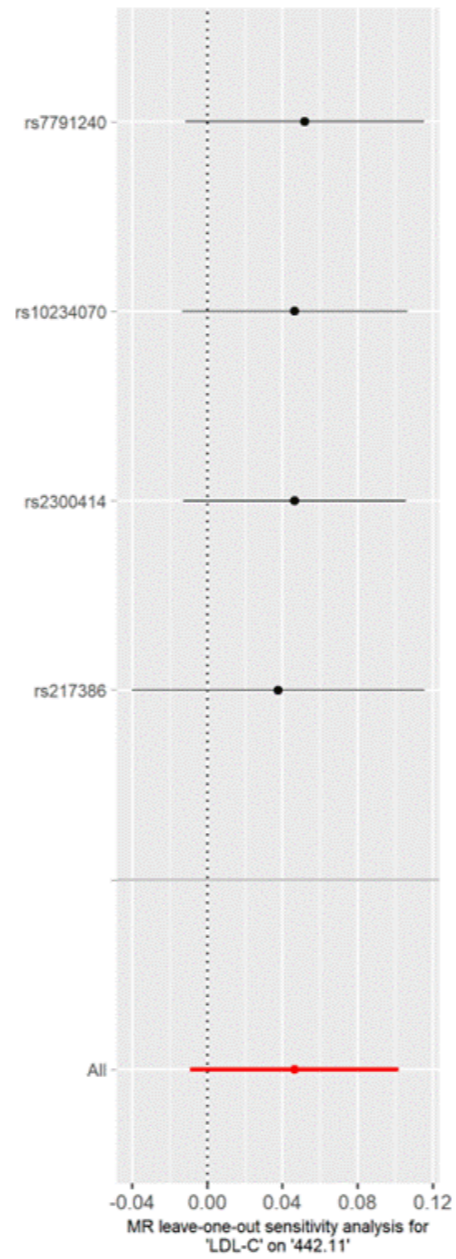

**Plot B**

**Plot A** shows the scatter plot of the variant-outcome association estimates for each genetic variant, against the overall estimates for the variant-exposure (i.e. LDL-C lowering) association using different MR methods.

**Plot B** displays the leave-one-out analysis, which compares the effect estimates when excluding each of the genetic variants in the GRS, one at a time, to the overall estimate including all variants.

**Peripheral vascular disease (443)**

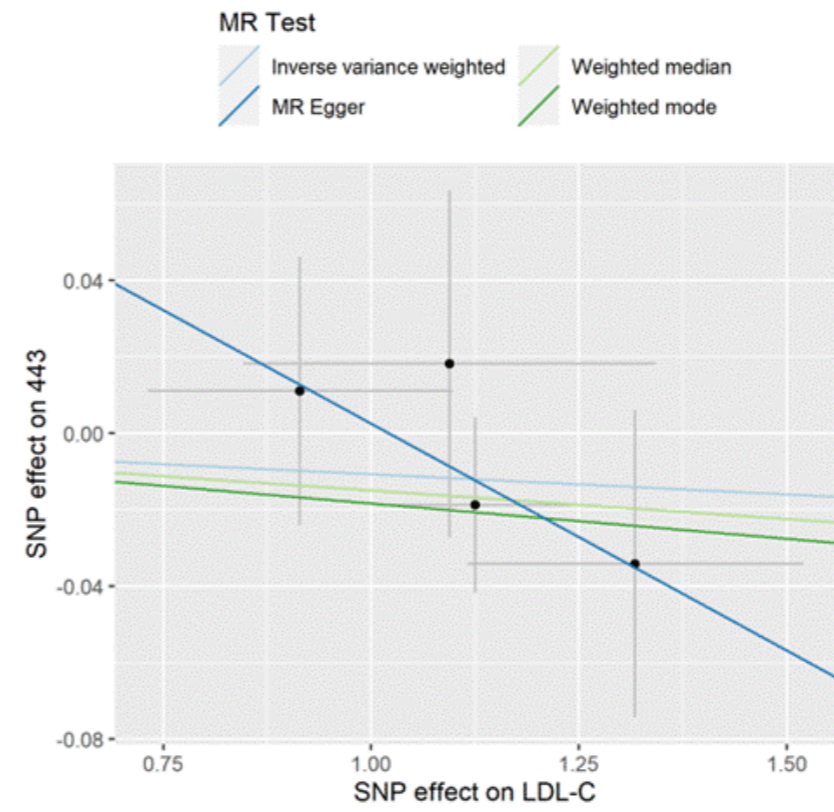

**Plot A**

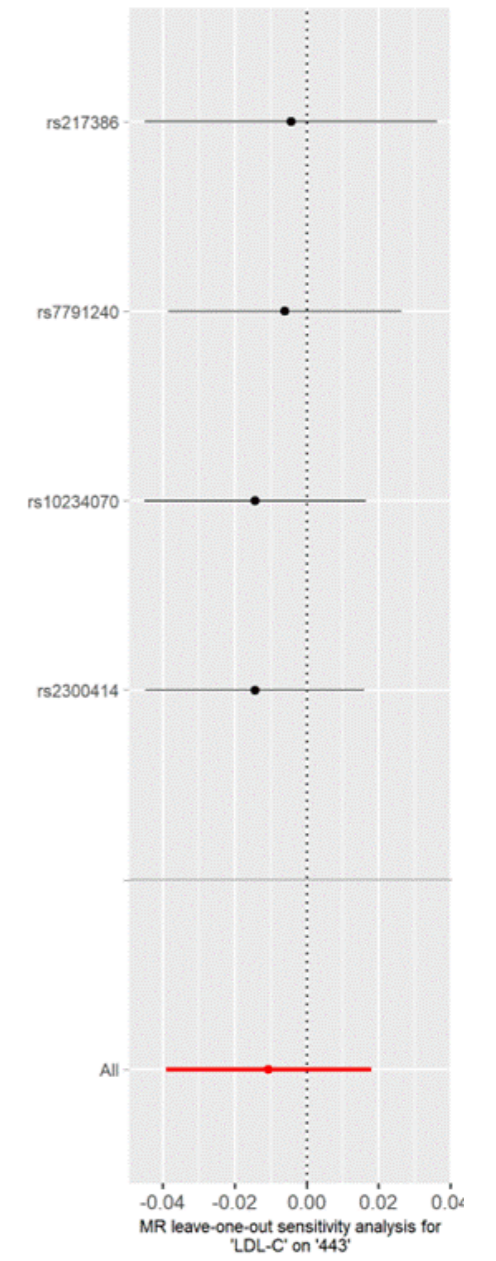

**Plot B**

**Plot A** shows the scatter plot of the variant-outcome association estimates for each genetic variant, against the overall estimates for the variant-exposure (i.e. LDL-C lowering) association using different MR methods.

**Plot B** displays the leave-one-out analysis, which compares the effect estimates when excluding each of the genetic variants in the GRS, one at a time, to the overall estimate including all variants.

**Hypercholesterolemia (272.11)**

**Diarrhea (561.1)**

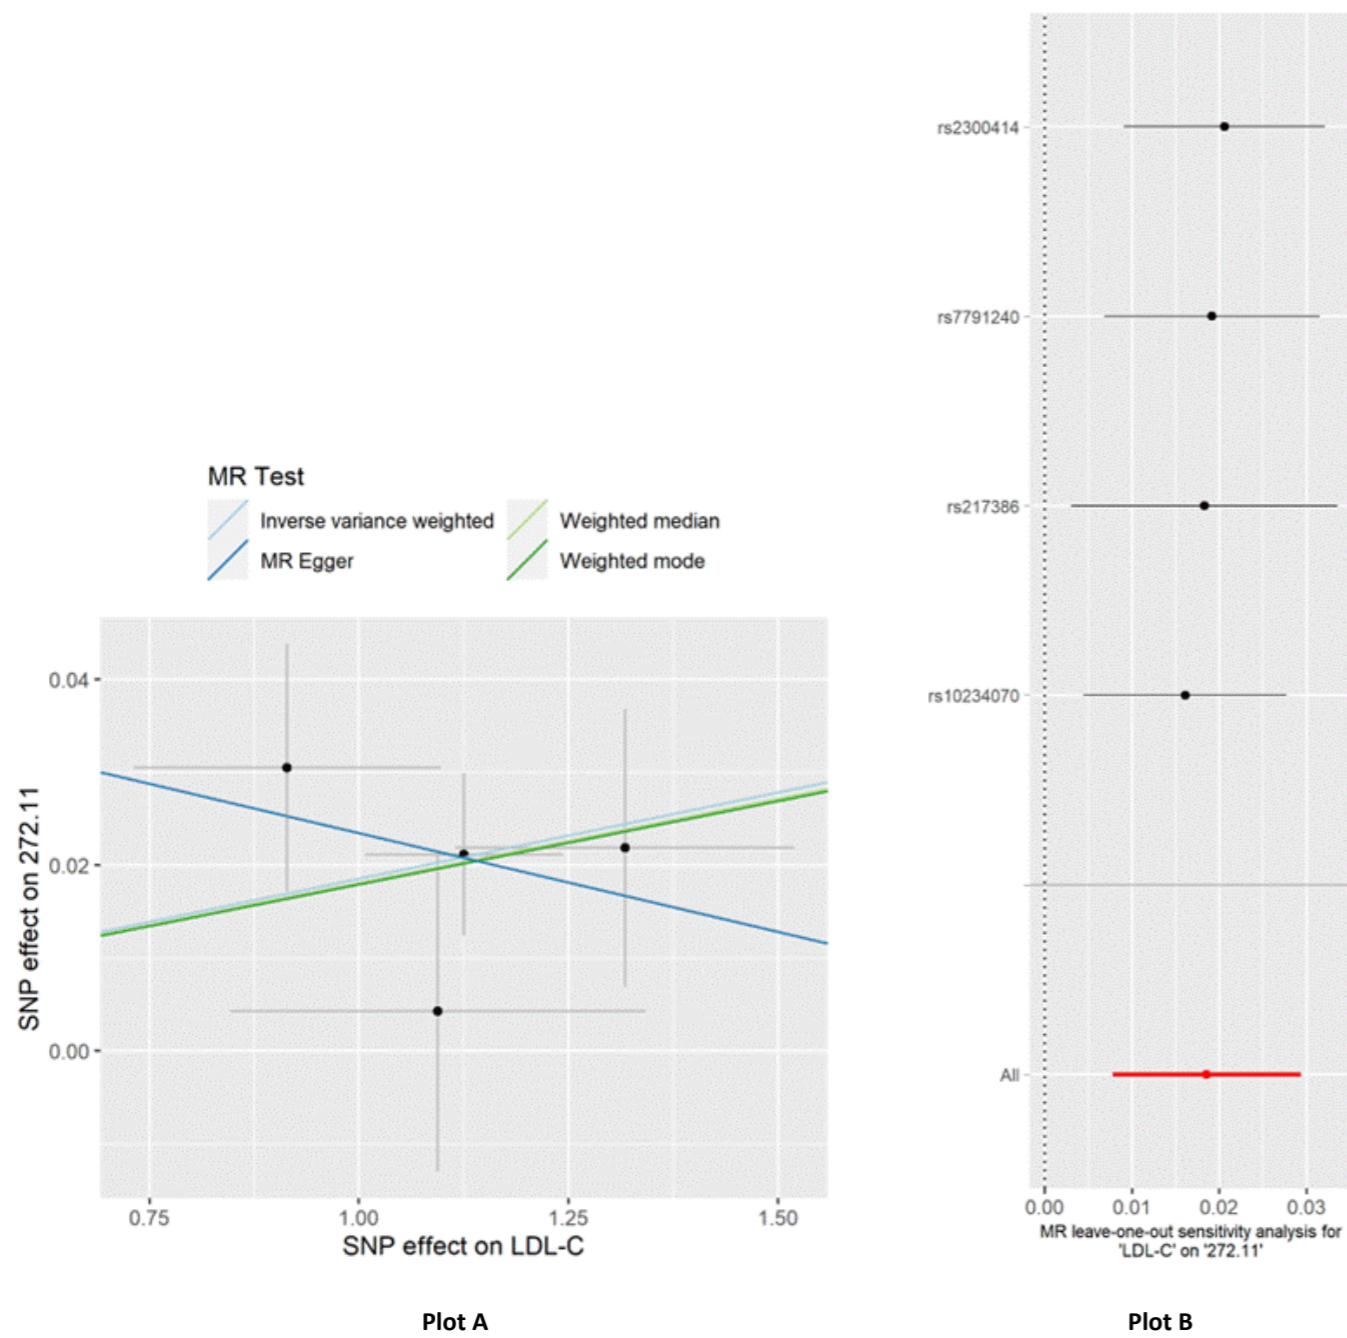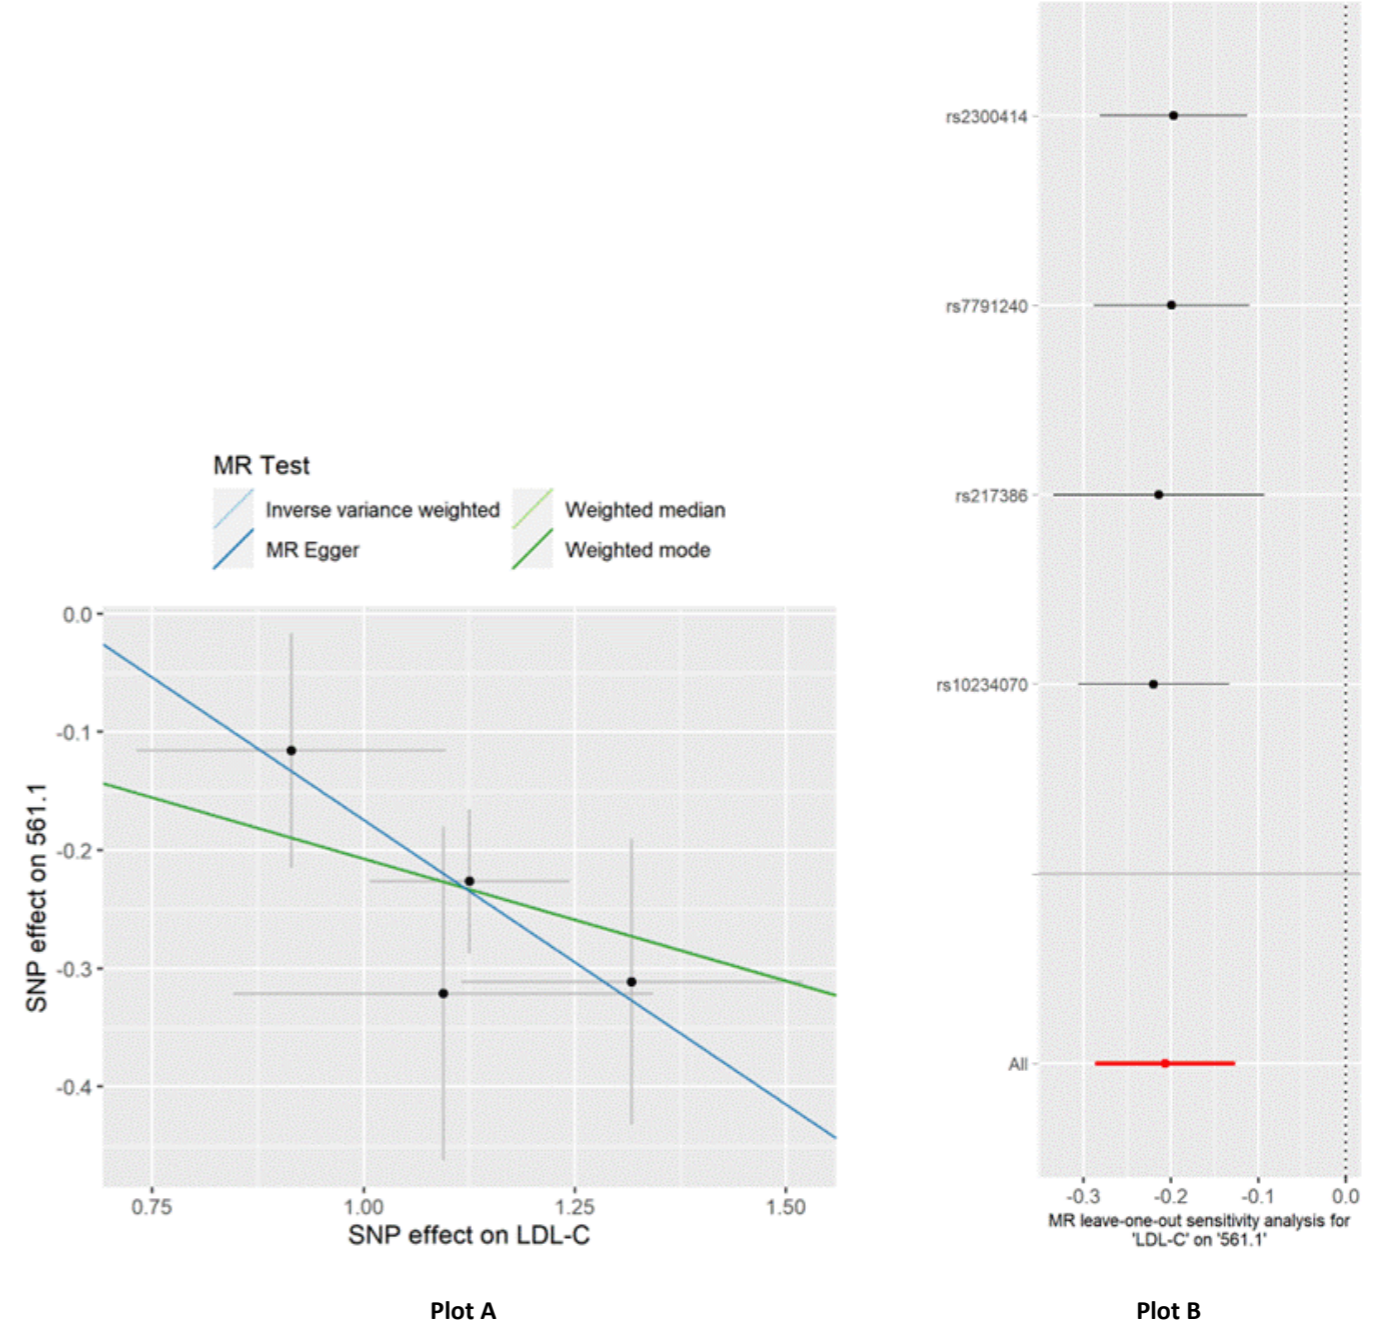

**Plot A** shows the scatter plot of the variant-outcome association estimates for each genetic variant, against the overall estimates for the variant-exposure (i.e. LDL-C lowering) association using different MR methods.

**Plot B** displays the leave-one-out analysis, which compares the effect estimates when excluding each of the genetic variants in the GRS, one at a time, to the overall estimate including all variants.

**Plot A** shows the scatter plot of the variant-outcome association estimates for each genetic variant, against the overall estimates for the variant-exposure (i.e. LDL-C lowering) association using different MR methods.

**Plot B** displays the leave-one-out analysis, which compares the effect estimates when excluding each of the genetic variants in the GRS, one at a time, to the overall estimate including all variants.

**Supplementary Figure 4:** Plots for the 10 distinct LDL-C-disease associations significant under FDR correction, for the NPC1L1 genetic risk score.

**Unstable angina (411.1)**

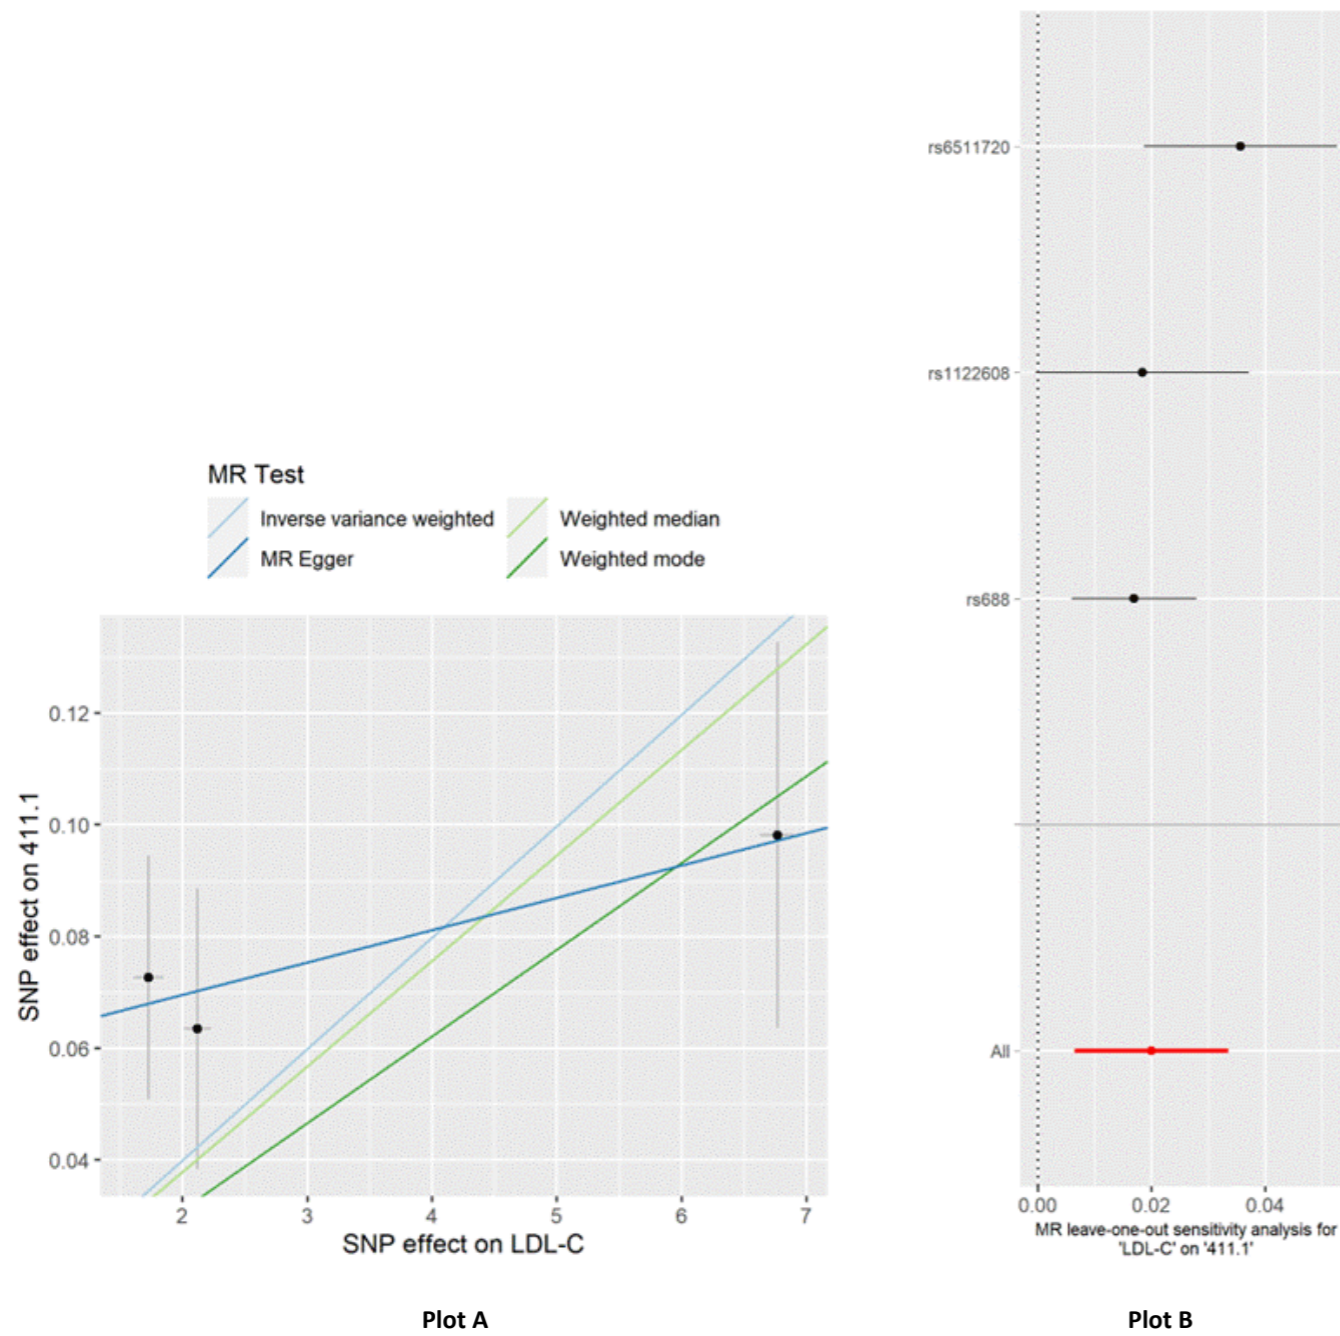

**Plot A** shows the scatter plot of the variant-outcome association estimates for each genetic variant, against the overall estimates for the variant-exposure (i.e. LDL-C lowering) association using different MR methods.

**Plot B** displays the leave-one-out analysis, which compares the effect estimates when excluding each of the genetic variants in the GRS, one at a time, to the overall estimate including all variants.

**Myocardial infarction (411.2)**

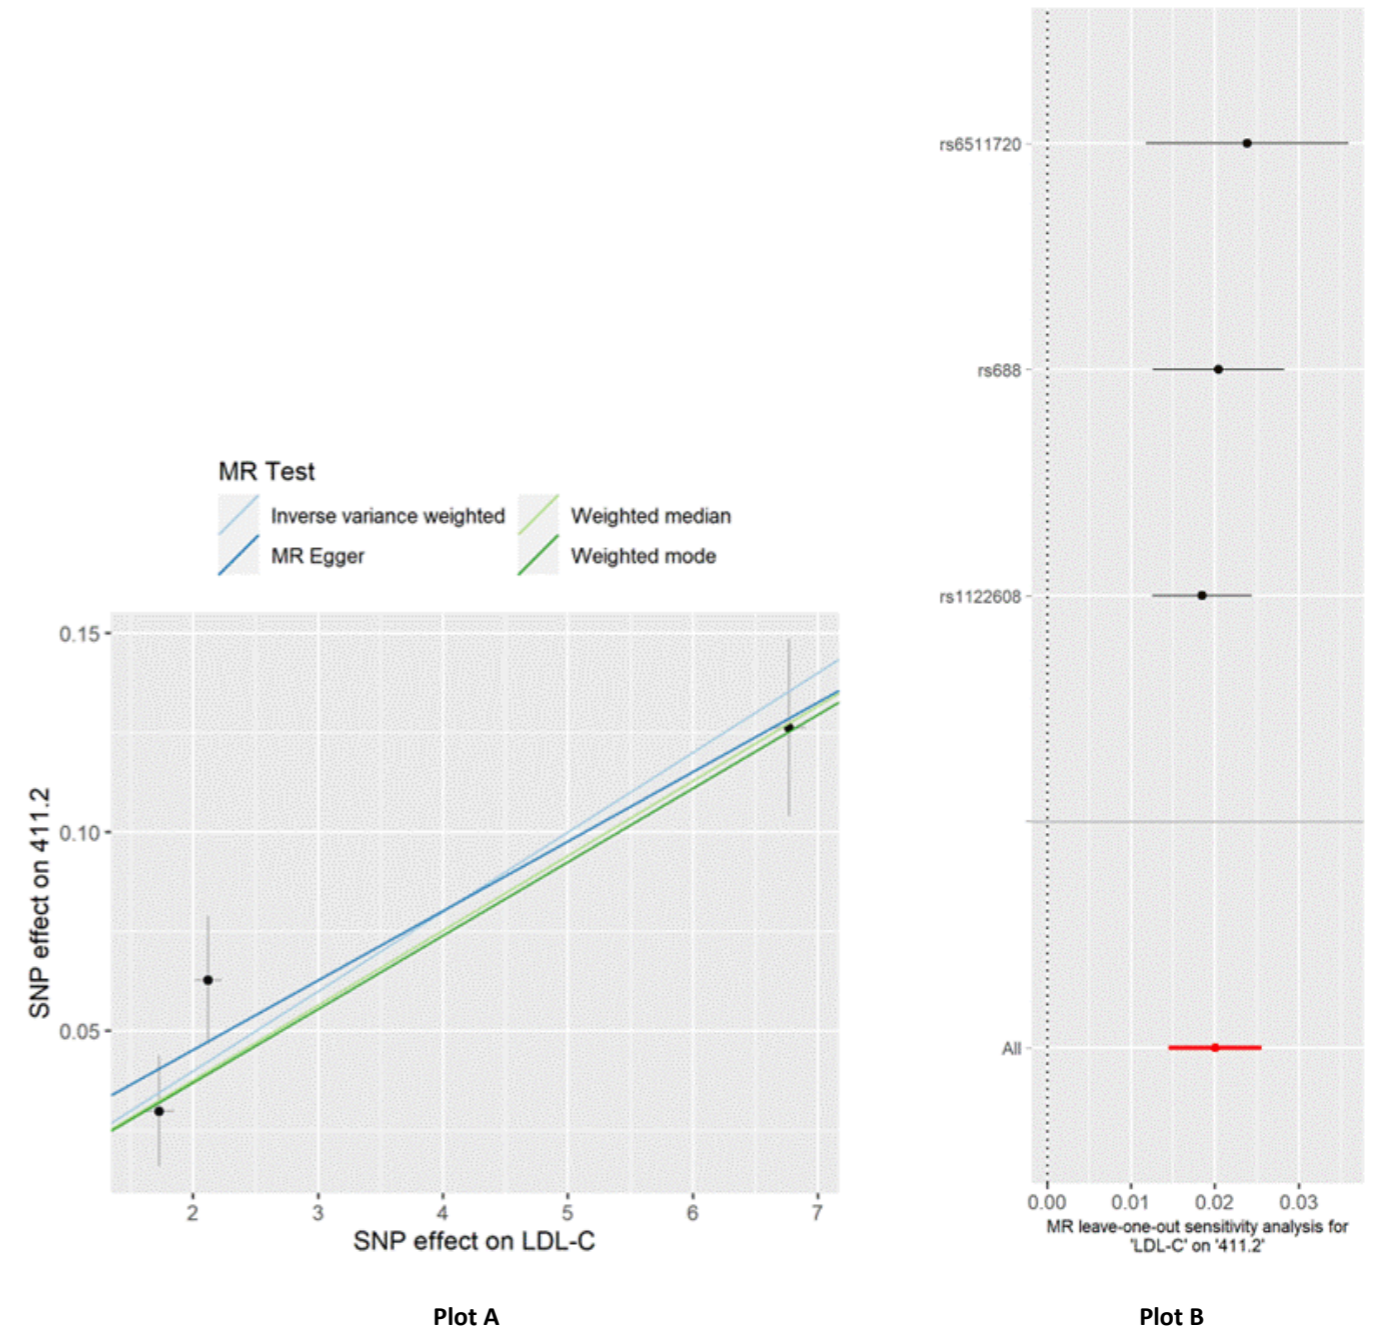

**Plot A** shows the scatter plot of the variant-outcome association estimates for each genetic variant, against the overall estimates for the variant-exposure (i.e. LDL-C lowering) association using different MR methods.

**Plot B** displays the leave-one-out analysis, which compares the effect estimates when excluding each of the genetic variants in the GRS, one at a time, to the overall estimate including all variants.

**Angina pectoris (411.3)**

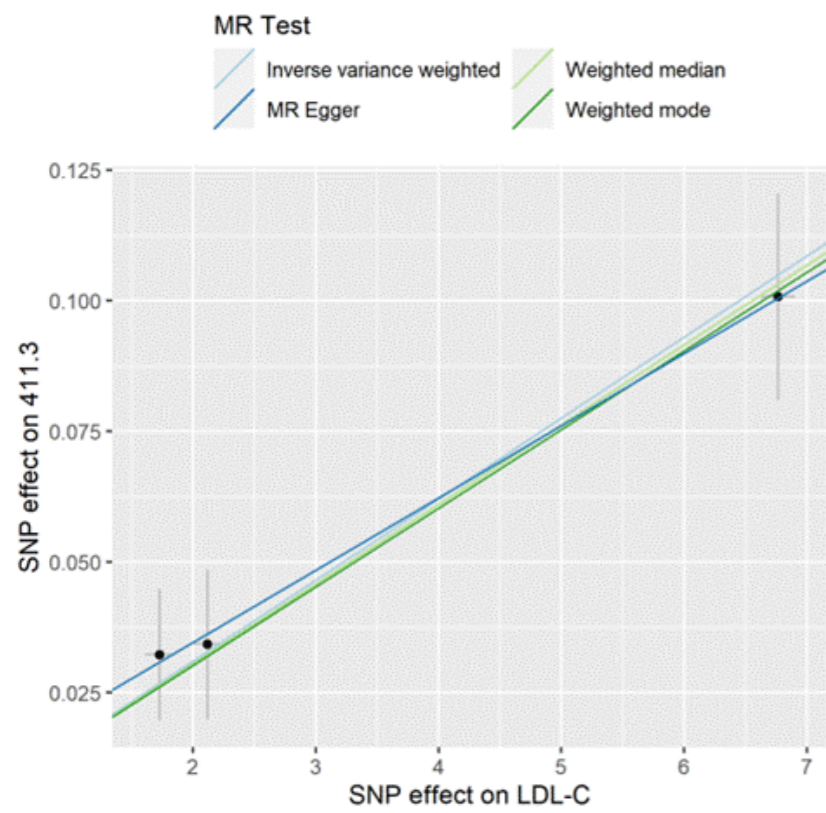

**Plot A**

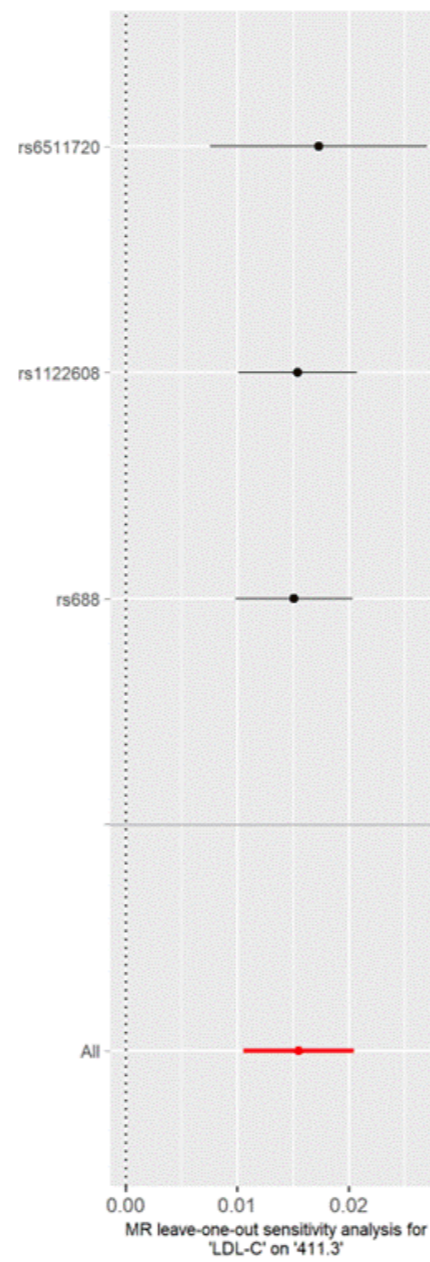

**Plot B**

**Plot A** shows the scatter plot of the variant-outcome association estimates for each genetic variant, against the overall estimates for the variant-exposure (i.e. LDL-C lowering) association using different MR methods.

**Plot B** displays the leave-one-out analysis, which compares the effect estimates when excluding each of the genetic variants in the GRS, one at a time, to the overall estimate including all variants.

**Coronary atherosclerosis (411.4)**

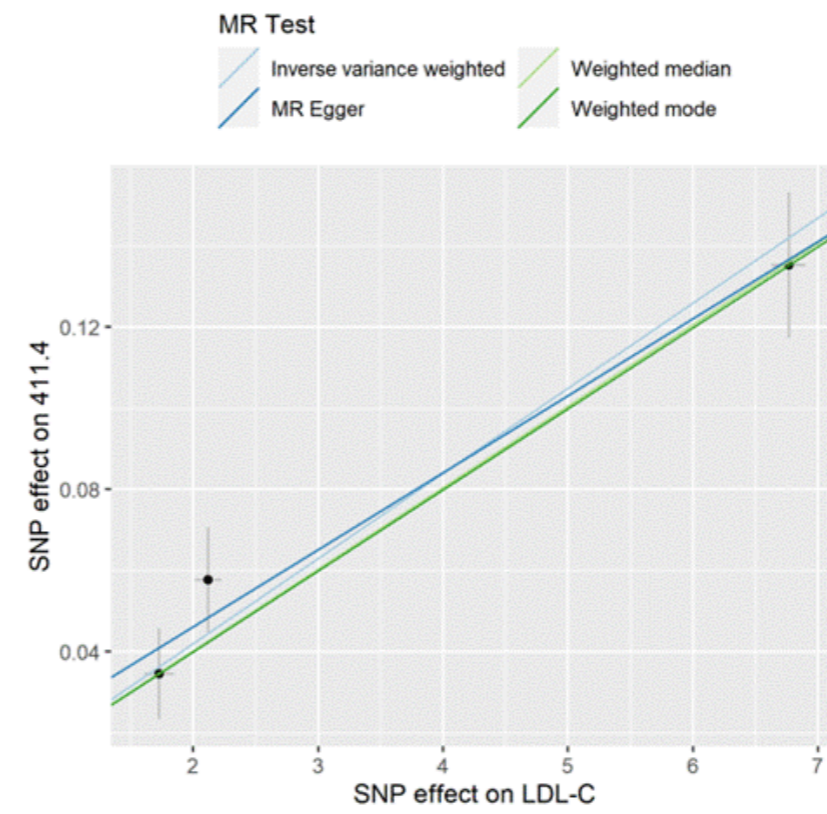

**Plot A**

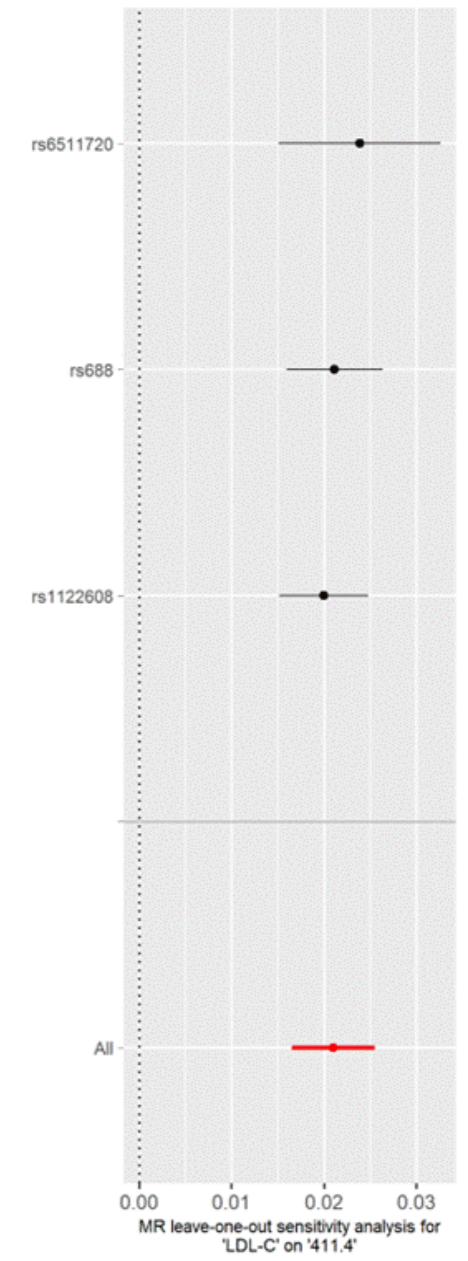

**Plot B**

**Plot A** shows the scatter plot of the variant-outcome association estimates for each genetic variant, against the overall estimates for the variant-exposure (i.e. LDL-C lowering) association using different MR methods.

**Plot B** displays the leave-one-out analysis, which compares the effect estimates when excluding each of the genetic variants in the GRS, one at a time, to the overall estimate including all variants.



**Other chronic ischemic heart disease (411.8)**

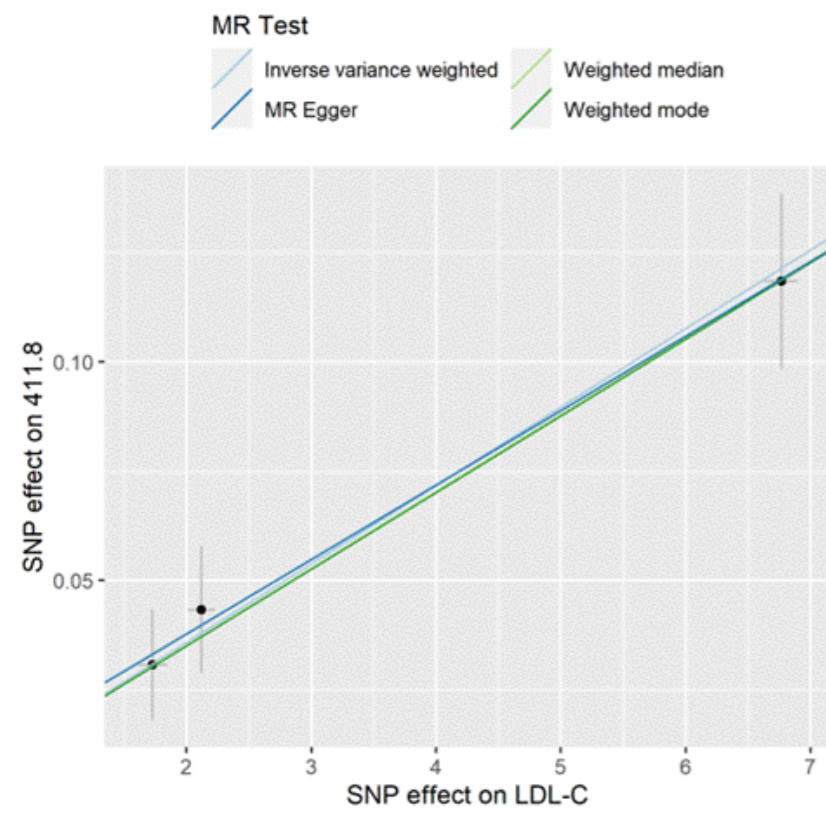

**Plot A**

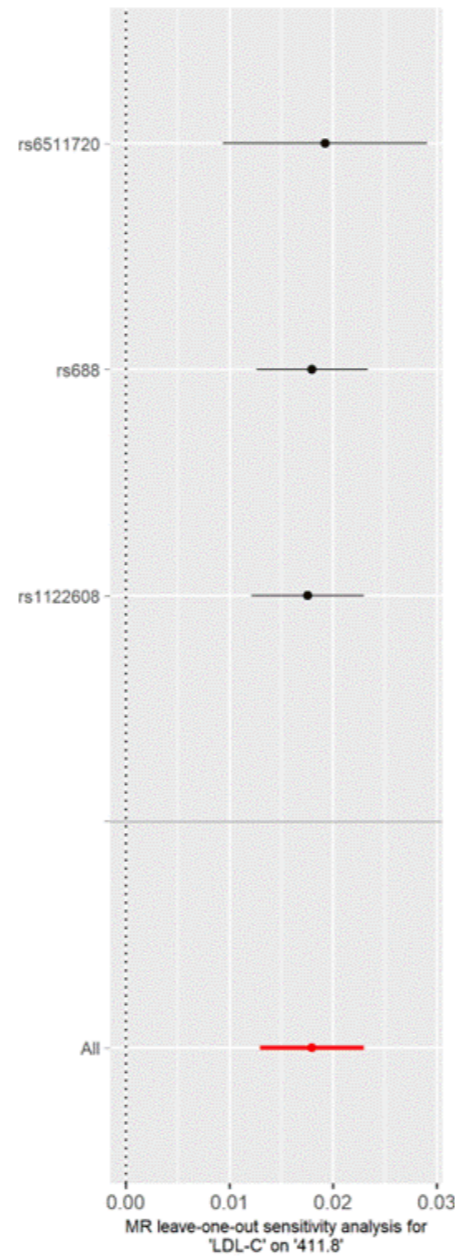

**Plot B**

**Plot A** shows the scatter plot of the variant-outcome association estimates for each genetic variant, against the overall estimates for the variant-exposure (i.e. LDL-C lowering) association using different MR methods.

**Plot B** displays the leave-one-out analysis, which compares the effect estimates when excluding each of the genetic variants in the GRS, one at a time, to the overall estimate including all variants.

**Hypertensive heart and/or renal disease (401.2)**

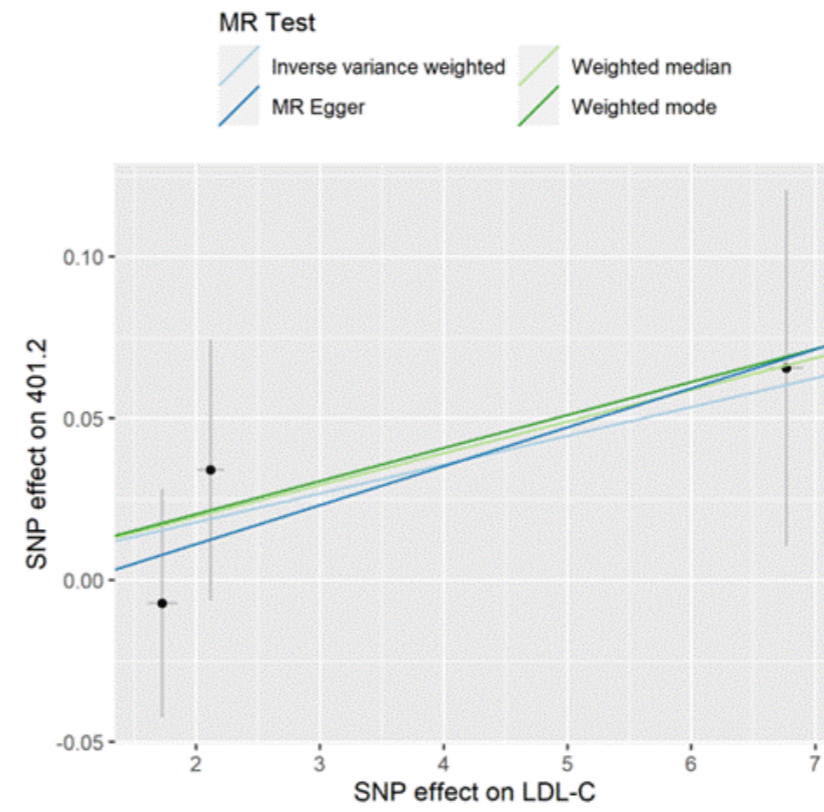

**Plot A**

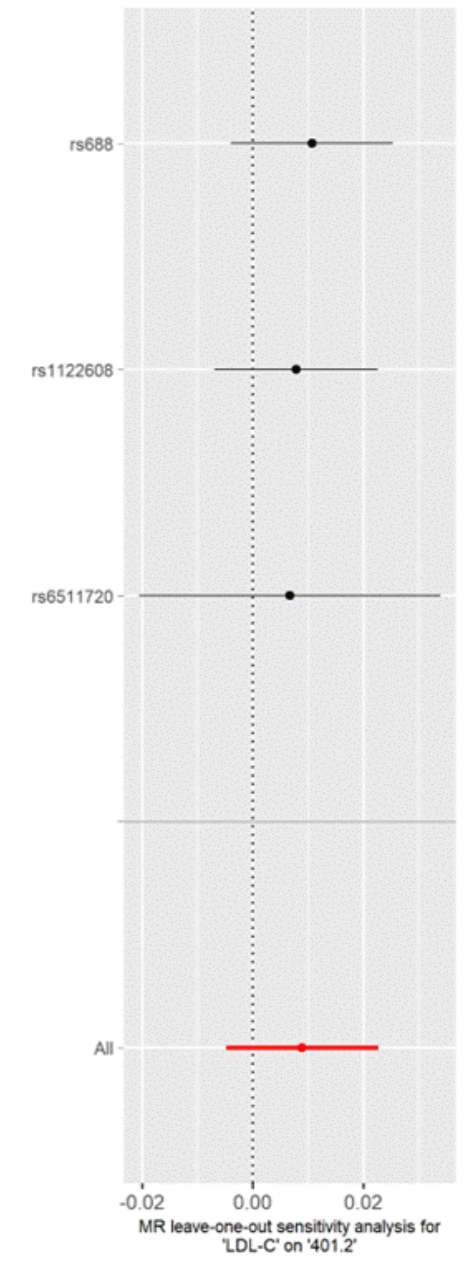

**Plot B**

**Plot A** shows the scatter plot of the variant-outcome association estimates for each genetic variant, against the overall estimates for the variant-exposure (i.e. LDL-C lowering) association using different MR methods.

**Plot B** displays the leave-one-out analysis, which compares the effect estimates when excluding each of the genetic variants in the GRS, one at a time, to the overall estimate including all variants.

**Abdominal aortic aneurysm (442.11)**

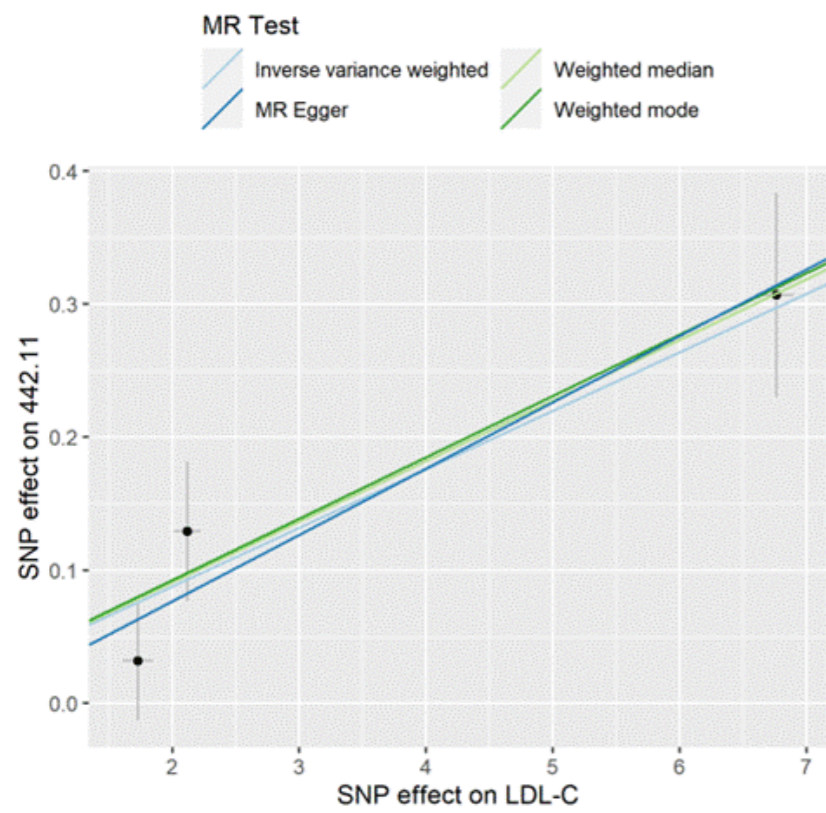

**Plot A**

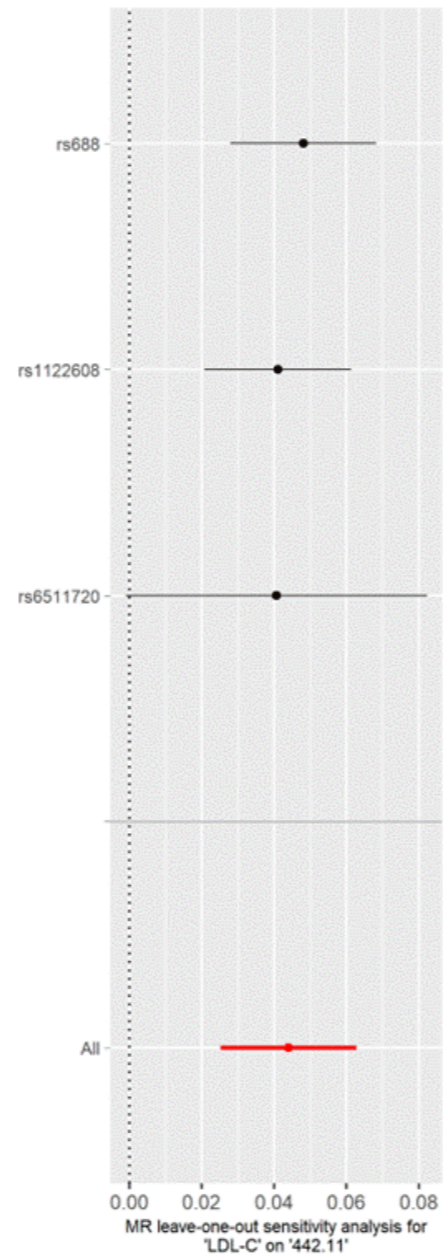

**Plot B**

**Plot A** shows the scatter plot of the variant-outcome association estimates for each genetic variant, against the overall estimates for the variant-exposure (i.e. LDL-C lowering) association using different MR methods.

**Plot B** displays the leave-one-out analysis, which compares the effect estimates when excluding each of the genetic variants in the GRS, one at a time, to the overall estimate including all variants.

**Peripheral vascular disease (443)**

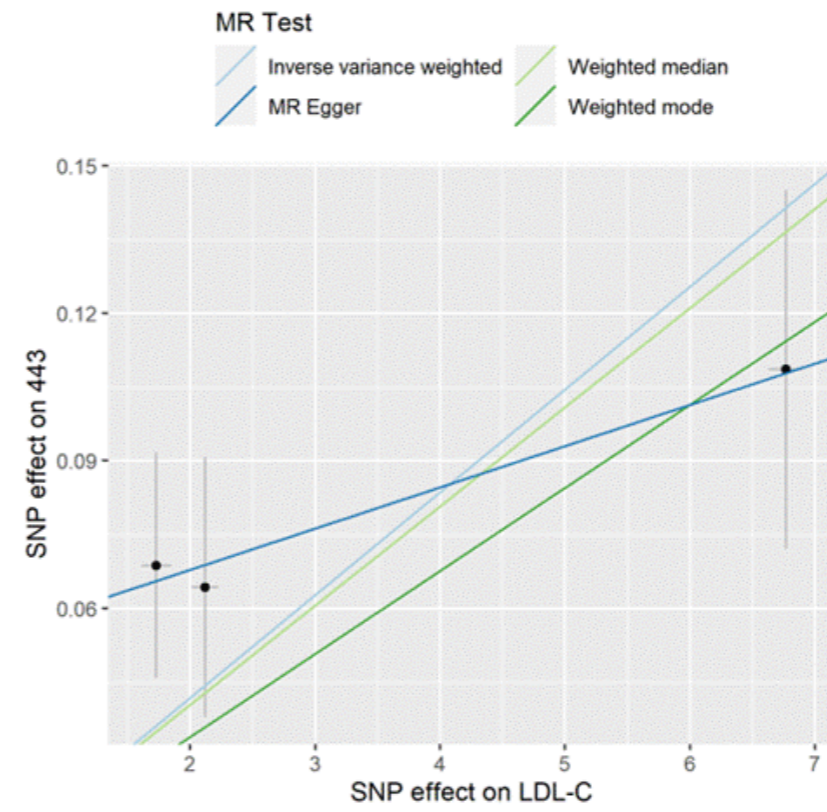

**Plot A**

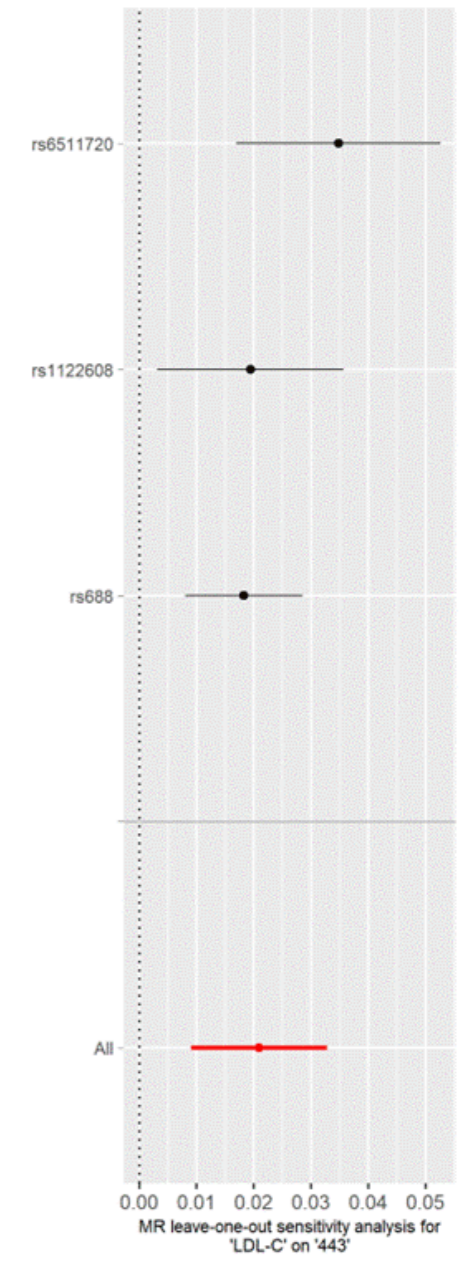

**Plot B**

**Plot A** shows the scatter plot of the variant-outcome association estimates for each genetic variant, against the overall estimates for the variant-exposure (i.e. LDL-C lowering) association using different MR methods.

**Plot B** displays the leave-one-out analysis, which compares the effect estimates when excluding each of the genetic variants in the GRS, one at a time, to the overall estimate including all variants.

**Hypercholesterolemia (272.11)**

**Diarrhea (561.1)**

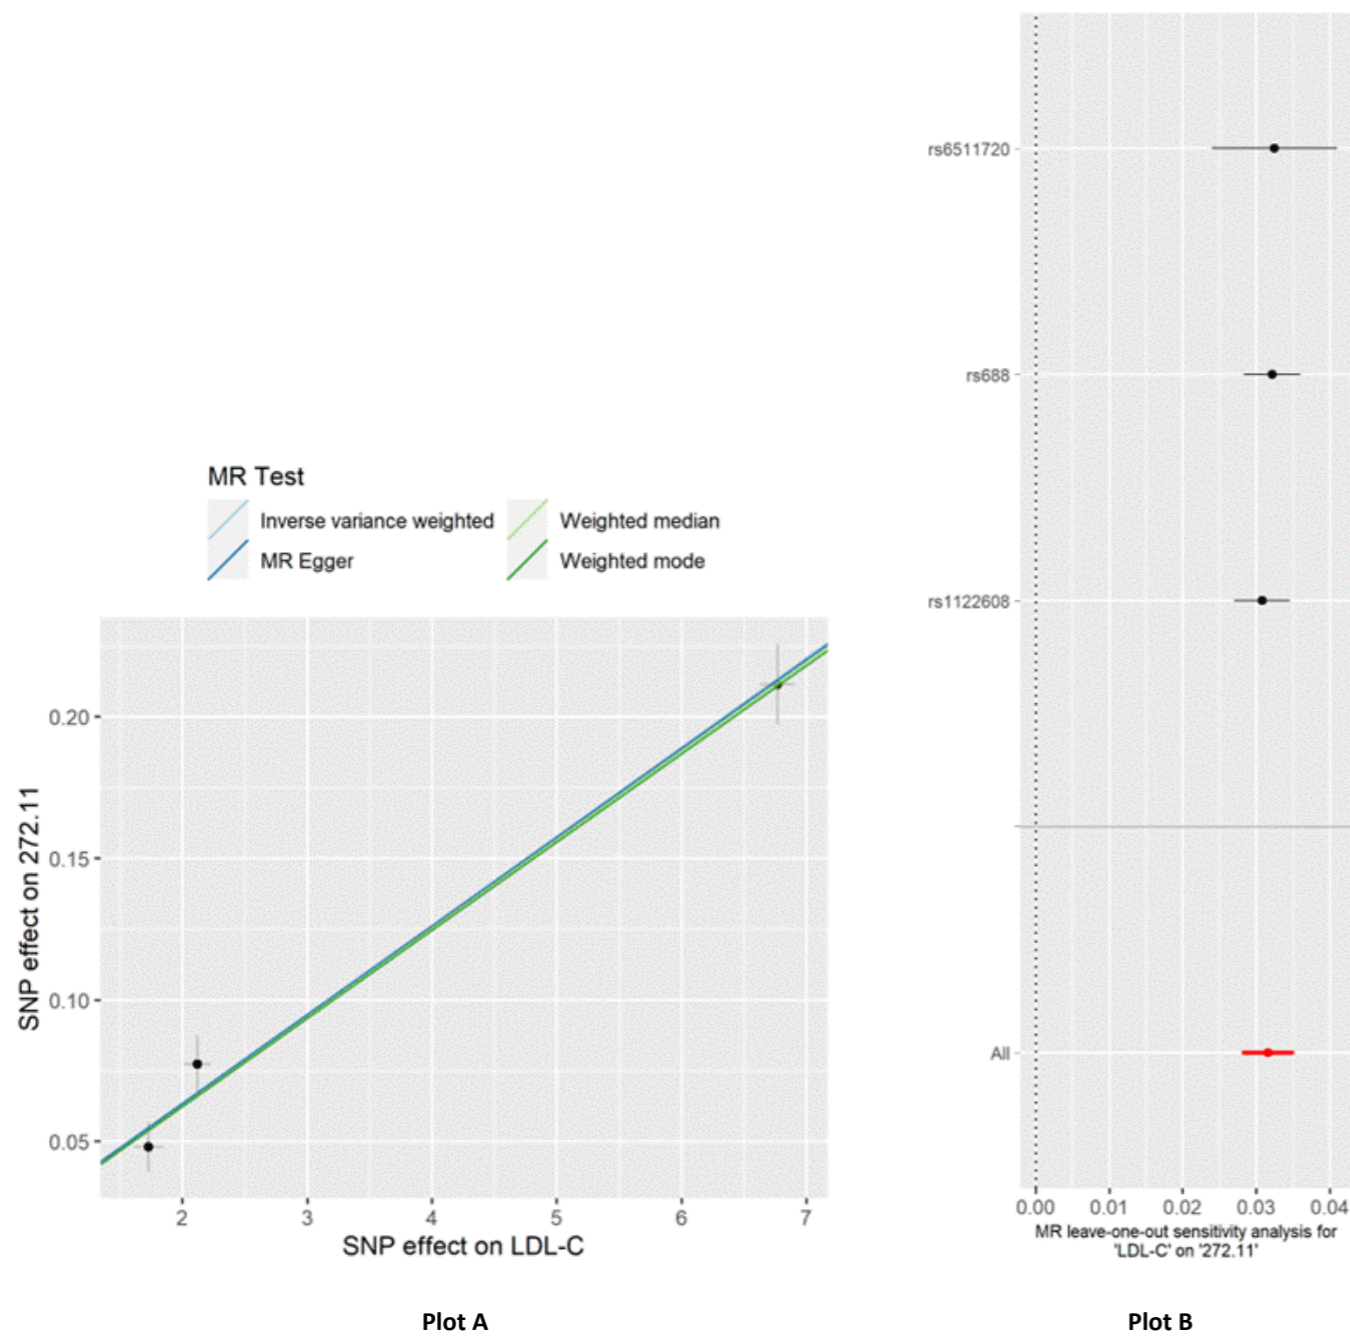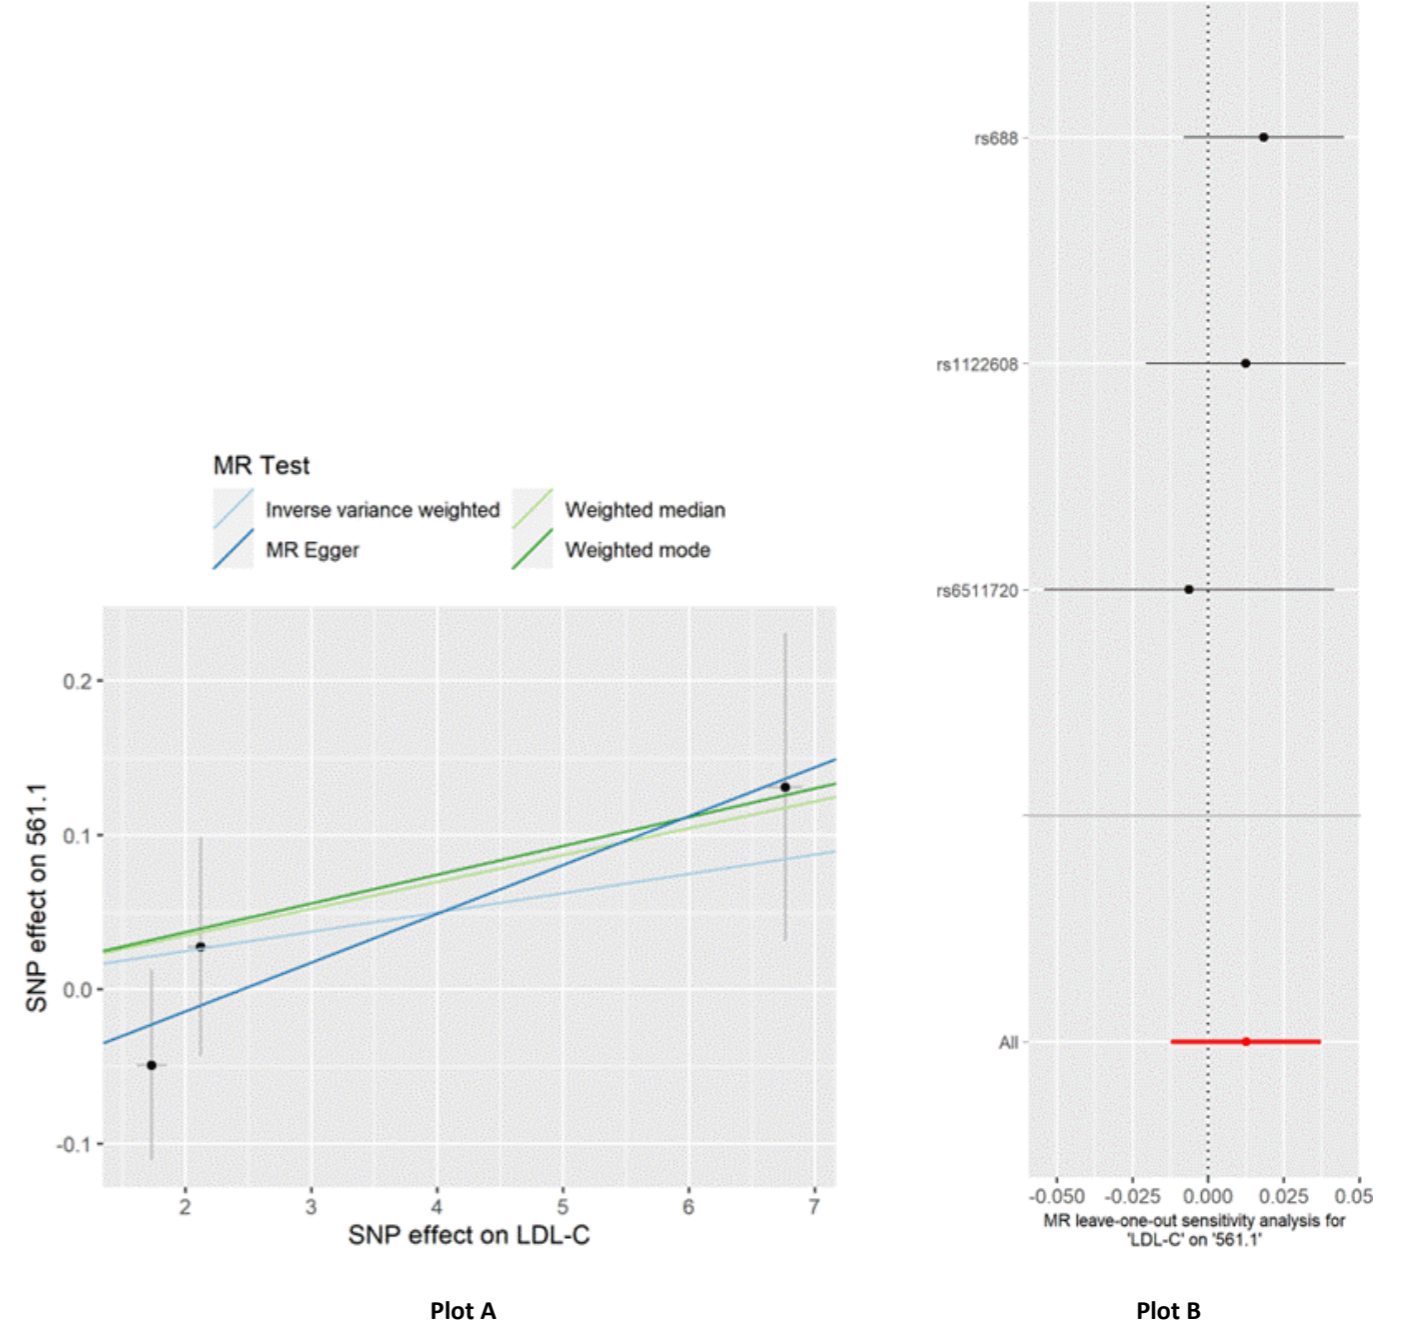

**Plot A** shows the scatter plot of the variant-outcome association estimates for each genetic variant, against the overall estimates for the variant-exposure (i.e. LDL-C lowering) association using different MR methods.

**Plot B** displays the leave-one-out analysis, which compares the effect estimates when excluding each of the genetic variants in the GRS, one at a time, to the overall estimate including all variants.

**Plot A** shows the scatter plot of the variant-outcome association estimates for each genetic variant, against the overall estimates for the variant-exposure (i.e. LDL-C lowering) association using different MR methods.

**Plot B** displays the leave-one-out analysis, which compares the effect estimates when excluding each of the genetic variants in the GRS, one at a time, to the overall estimate including all variants.

**Supplementary Figure 5:** Plots for the 10 distinct LDL-C-disease associations significant under FDR correction, for the LDLR genetic risk score.

**Supplementary Figure 6:** Forest plots for the mendelian randomisation analyses on 5 LDL-C lowering hormone biomarker associations, using the LDL-C lowering genetic instruments and stratified by sex. Analyses using inverse-variance weighted mendelian randomisation (IVWMR) are shown. Estimates are odds ratios (OR 95% CI) per 1mg/dL lower LDL-cholesterol.

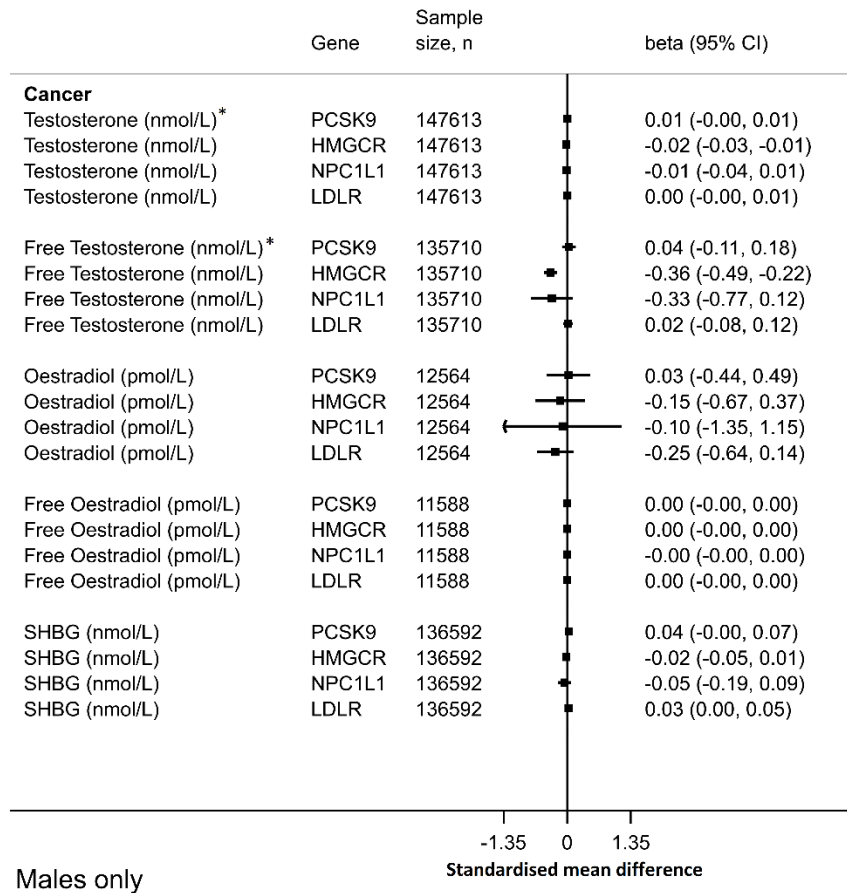

\* Heterogeneity p val <0.0001

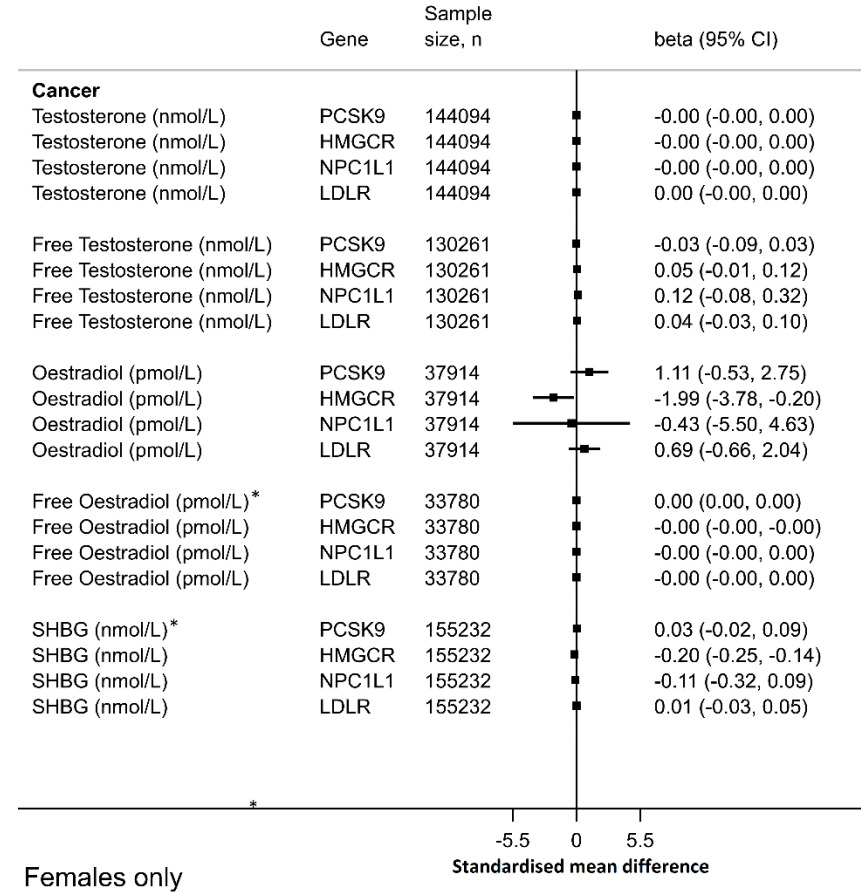

\* Heterogeneity p val <0.0001
